# Supplementary material for: Microstructural organization of human insula is linked to its macrofunctional circuitry and predicts cognitive control
Source: eLife. 2020 Jun 4;9:e53470. doi: 10.7554/eLife.53470 (PMC7308087; doi:10.7554/eLife.53470)
Supplement: Figure 2—source data 1. [file elife-53470-fig2-data1.csv]

subjId	rPI	rdAI	rvAI	lPI	ldAI	lvAI
101410	3.36451268196	3.08299565315	3.01017785072	3.34721183777	2.89840745926	2.78672981262
101915	3.81844449043	3.50915575027	3.61293983459	4.45881891251	3.97904229164	3.4698843956
102311	3.80758190155	3.17935609818	3.08168745041	3.92708325386	3.30550956726	3.36455821991
102816	3.63833642006	3.12899899483	2.78566622734	3.70040202141	3.34857273102	3.00587654114
103111	3.80812335014	3.39280152321	3.37157607079	3.75036740303	3.63915133476	3.68055605888
103414	3.5445098877	3.42250967026	3.27194857597	3.87229514122	3.57716202736	3.27743697166
103818	4.21559333801	3.94998335838	3.88945150375	4.61971521378	4.19962120056	3.80199074745
104820	3.44230151176	3.33568048477	3.00955152512	3.01334691048	3.10350823402	2.86406946182
105115	3.83803391457	3.57794809341	3.5205552578	3.50706291199	3.27892756462	3.31752634048
105216	3.52132105827	3.16146612167	3.25789570808	3.636926651	3.14205908775	3.1218817234
106016	3.4295129776	3.07060432434	2.95205116272	3.51151680946	3.29673600197	3.32476735115
106319	3.4269220829	3.24646258354	3.15203547478	3.5765349865	3.36744832993	3.28996133804
106521	3.37314987183	3.22452425957	3.1821668148	3.49592971802	3.27304530144	2.93444395065
107321	3.47990822792	3.23262286186	3.20189237595	3.42919492722	3.2190387249	3.29750442505
107422	4.04297590256	3.98594880104	3.81164669991	3.45196461678	3.37573480606	3.52162909508
108323	3.30724716187	2.93449783325	2.85679578781	3.51818346977	3.1830728054	3.09560322762
108525	3.41454386711	3.05954551697	2.92595076561	3.44707679749	3.02799153328	2.66002559662
108828	3.61802721024	3.39791297913	3.50438570976	3.26394462585	3.27433943748	3.36158013344
109123	3.7146923542	3.57656955719	3.46329259872	3.26336836815	3.29577422142	3.57623934746
110411	4.03344917297	3.6179189682	3.69026303291	3.97331404686	3.6696844101	3.56761717796
111312	3.55459666252	3.47563385963	3.38989639282	3.86788606644	3.75580453873	3.62941169739
111413	3.69099187851	3.56584239006	3.56804704666	3.71035194397	3.56919121742	3.18784976006
111716	3.785343647	3.78582978249	3.73602795601	4.58679914474	4.12307214737	3.67351436615
113215	3.3940911293	3.092451334	3.04982185364	3.98472547531	3.42301487923	3.04551768303
113922	3.55383276939	3.13624095917	2.84566140175	3.59897351265	3.40106606483	3.29545402527
114419	4.12071752548	3.57288074493	3.72592043877	3.95363140106	3.45094442368	3.39113044739
115320	4.06232213974	3.77598452568	3.9678106308	4.18965530396	3.84312415123	3.98607158661
116524	3.82279086113	3.49021410942	3.44779109955	3.79402661324	3.57504415512	3.47633457184
117122	4.03017807007	3.61523151398	3.51368451118	3.83676457405	3.76772594452	3.82302308083
117324	3.48713350296	3.21126508713	2.82992625237	3.46429848671	3.21153998375	3.16684746742
118528	3.12392067909	2.89513278008	3.03254938126	3.43182086945	3.06343579292	2.96387243271
118730	3.48170804977	3.18145155907	3.37966799736	3.83959174156	3.35974574089	3.04479694366
118932	3.74853897095	3.32230687141	3.224391222	3.79090237617	3.41578102112	3.35305428505
119833	3.43958115578	3.0495557785	3.32499885559	3.40919065475	3.12717604637	3.0340821743
120111	3.75745511055	3.4974937439	3.35631489754	3.87960720062	3.6559510231	3.40584158897
120212	4.25223731995	4.19625854492	3.93927526474	4.31270503998	3.88649129868	3.72104072571
120515	3.64538621902	3.70100283623	3.68807530403	4.27894687653	3.95350313187	3.89875221252
122317	3.71305322647	3.48563814163	3.60517454147	3.57495903969	3.61577486992	3.48682403564
122620	3.93742108345	3.76281261444	3.85016679764	4.09669113159	3.92990994453	3.79827642441
123117	3.66144633293	3.44790840149	3.43260860443	3.90442204475	3.5570063591	3.13589024544
123420	3.58079242706	3.5289952755	3.64695477486	3.32007861137	2.96848773956	3.12508392334
123925	3.5484559536	3.45869350433	3.36870336533	3.95882701874	3.51086497307	3.5970788002
124220	3.67564249039	3.16998267174	3.33923196793	3.80850410461	3.20585441589	3.15886425972
124422	4.08437776566	3.80955958366	3.8013510704	4.27012014389	4.03515005112	3.98026657104
124826	3.57841658592	3.14515447617	3.10068225861	4.10148620605	3.74981021881	3.25557899475
126325	3.95310378075	3.70030641556	3.5602619648	3.85650110245	3.53775501251	3.29082536697
127630	3.48182153702	3.11693549156	3.07536005974	3.61946439743	3.47347688675	3.43915700912
127933	3.20904421806	3.11425900459	3.38211560249	3.42874479294	3.45028114319	3.46716856956
128127	3.88888025284	3.48175573349	3.29944372177	3.63744854927	3.40111255646	3.74614930153
129028	3.36314463615	3.16168951988	3.1679880619	3.60689306259	3.45267081261	3.28022837639
130316	3.68111491203	3.42916154861	3.24721264839	3.84102272987	3.63689255714	3.42670989037
131217	3.89979577065	3.87044334412	3.93588733673	3.89616966248	3.40181779861	3.6344268322
131722	3.53586363792	3.46802711487	3.27383613586	3.50084590912	3.13734579086	3.00230765343
131924	3.37528371811	3.20548248291	3.21943831444	3.73740839958	3.3309366703	3.52916932106
133019	4.01422977448	3.48778557777	3.36459732056	3.62168812752	3.75341248512	3.79337978363
133625	3.38318252563	3.15261673927	3.25427675247	3.74837779999	3.33636140823	3.25780248642
133827	3.38625407219	3.16416096687	3.3339369297	3.13312721252	2.89489030838	3.16516399384
133928	3.6754591465	3.15220236778	3.15942168236	3.85360336304	3.59928798676	3.4300506115
135225	3.67785143852	3.10055804253	3.23961138725	4.08219766617	3.72113347054	3.52435612679
135528	3.71682190895	3.30738997459	2.85270810127	3.7896399498	3.38339924812	2.65461492538
135932	3.80919361115	3.44265818596	3.29906225204	3.87385487556	3.54822707176	3.43329501152
136227	3.30903172493	3.10620141029	3.21109366417	3.41449022293	3.14442920685	3.18226289749
136833	3.8712375164	3.52171802521	3.43449521065	3.3752849102	3.12497234344	3.18616127968
137633	3.47871851921	3.20678091049	3.11543607712	4.0682387352	3.65844583511	3.38538789749
138231	3.57357621193	3.27532792091	3.2276968956	3.71360135078	3.44374155998	3.44877910614
138534	3.21183943748	3.11071491241	2.98880529404	3.35475206375	3.12459135056	2.98715877533
139233	3.32451438904	3.09596681595	3.27512764931	3.50828814507	3.35025072098	3.51088857651
139637	3.73794674873	3.41283106804	3.52865672112	3.55210876465	3.42128252983	3.57360458374
140117	3.66674256325	3.53068804741	3.38711714745	3.51447510719	3.2712624073	3.24726867676
140420	3.69289088249	3.39422178268	3.12449359894	3.86124515533	3.68120312691	3.36929321289
140824	3.45057606697	3.5967540741	3.79887676239	3.35674166679	3.09767079353	3.2464094162
140925	3.42941045761	3.05340433121	2.97106599808	3.49050879478	3.15937709808	3.05469083786
141422	3.6000597477	3.49953436852	3.46671247482	3.91302919388	3.60409665108	3.6524245739
141826	3.89183688164	3.5803732872	3.64384365082	4.11005401611	3.72778010368	3.64202427864
143325	3.94641375542	3.76808547974	3.76519441605	4.4458489418	4.08985519409	3.5908164978
144226	3.87518382072	3.63793873787	3.76979732513	4.44044494629	3.88443446159	3.29339885712
144832	2.88209462166	2.68923330307	2.71975064278	2.95097827911	2.67007994652	2.56174135208
145834	4.07800388336	3.77508115768	3.61923336983	3.80103874207	3.57143092155	3.67346525192
146331	3.35329174995	3.46297669411	3.5146086216	3.60493731499	3.45226764679	3.29715132713
146432	3.4100291729	3.18651914597	3.33977985382	3.61756157875	3.36845040321	3.22299766541
147030	3.28198194504	2.92235445976	2.70226335526	3.23612952232	3.16497039795	3.01562976837
147737	3.65637016296	3.42988467216	3.57698202133	4.1705956459	3.90761375427	3.6276113987
148032	3.47083306313	3.45567178726	3.32874822617	3.61678099632	3.32886362076	3.16882824898
148335	3.58223986626	3.25621795654	3.29459261894	3.26397132874	3.00734591484	3.06648254395
148840	3.73979616165	3.48853206635	3.21975493431	3.85266280174	3.59972596169	3.37479901314
148941	3.73776078224	3.44178271294	3.41747260094	3.95884680748	3.61400055885	3.63052272797
149337	3.1884598732	3.1524014473	3.16982030869	3.42442035675	3.15187859535	3.13753056526
149539	3.54229784012	3.37786722183	3.45319104195	3.80710148811	3.39820313454	3.5006082058
149741	3.43280053139	3.05464506149	3.047134161	3.34544348717	3.24684977531	3.22601747513
150625	3.7750146389	3.48353695869	3.38527178764	3.93402719498	3.75352430344	3.29693841934
150726	3.20546221733	2.99689269066	2.98470258713	3.09116435051	2.93349981308	2.89930224419
151223	3.41381239891	2.9325606823	2.94564700127	3.40634536743	3.01412463188	2.98449158669
151526	3.62367272377	3.46859502792	3.4956638813	3.3406932354	3.10320901871	3.05049967766
151627	3.80223679543	3.6807744503	3.4109916687	4.15714597702	3.78239941597	3.46414208412
151728	3.62750792503	3.2312502861	3.60774540901	3.88616013527	3.61827468872	3.5726723671
152831	3.06602597237	2.98847126961	2.9813117981	3.01054525375	2.85378646851	3.01121282578
153025	3.7833044529	3.64548778534	3.32598185539	4.030813694	3.80153656006	3.50348997116
153429	3.67076086998	3.37698030472	3.39884853363	3.9629278183	3.78559064865	3.7637283802
154431	3.97254252434	3.7487411499	3.66959786415	4.47977113724	3.81764626503	3.73663711548
154734	3.33827400208	3.1018178463	3.23975539207	3.42500305176	3.19594430923	3.10209202766
154835	3.83859586716	3.54272341728	3.32594656944	3.98865485191	3.63763070107	3.3944683075
154936	3.27876400948	3.07422494888	3.27831530571	3.38425755501	3.2047021389	3.15602612495
155231	3.4662566185	3.21069121361	2.97081637383	3.9032523632	3.69554066658	3.48617887497
155635	3.61797690392	3.30337071419	3.32290863991	4.14823532104	3.87366938591	3.64743351936
156233	3.51331162453	3.3539981842	3.32111620903	3.27351856232	3.1241812706	2.91646051407
156637	3.54539060593	3.2243950367	3.13911652565	3.51136636734	3.09431600571	2.71686124802
157336	4.08946371078	3.95379447937	3.67288541794	4.09851551056	3.89960932732	3.94670844078
157437	4.21584796906	3.9535279274	3.98074245453	4.61701345444	4.31187915802	4.14127349854
158035	3.45131897926	3.13550901413	3.04834914207	3.46389722824	3.50668954849	3.56717944145
158136	3.2173538208	3.12546539307	3.22362685204	3.65009260178	3.44512248039	3.17774105072
158540	3.78027367592	3.53298282623	3.33972215652	3.79517221451	3.687063694	3.56246209145
159138	3.60073757172	3.47381448746	3.48535871506	3.31989908218	2.91131162643	2.73919939995
159239	3.76073360443	3.55988550186	3.32371377945	4.41873407364	4.00043010712	3.72058701515
159340	3.20577335358	3.06845593452	3.14402151108	3.31709504128	3.10154795647	3.17410683632
159441	3.40945959091	3.26263427734	3.41033411026	3.72659254074	3.29510092735	3.52559113503
160123	3.202917099	3.09915423393	3.14463877678	3.61519813538	3.33489727974	3.21312379837
160830	3.75419163704	3.49010801315	3.18421816826	3.58231115341	3.28506445885	3.25357055664
161327	3.3303732872	2.93721652031	3.09869503975	3.53749132156	3.11597585678	3.08966612816
161630	3.62991786003	3.24228239059	2.92251443863	3.84056925774	3.3775434494	3.20540833473
161731	3.80458664894	3.60496735573	3.45762014389	4.01311540604	3.66137647629	3.21673107147
162026	3.9260134697	3.97128224373	4.09971141815	4.24894380569	3.95336127281	3.91813492775
162228	3.05160140991	2.81037974358	3.03129601479	3.00741147995	2.74498081207	2.91521763802
162329	3.90805792809	3.72055482864	3.4912340641	4.04374980927	3.8994204998	3.43792557716
162733	3.42882537842	3.32575845718	3.42052078247	3.52298760414	3.14750266075	3.05355548859
163129	3.33613991737	3.16227054596	3.24750900269	3.66236376762	3.28420448303	3.23132991791
163331	3.57172584534	3.20484972	3.06663107872	3.40062308311	3.35406589508	3.17356395721
163836	3.50442266464	3.32810473442	3.38790726662	3.2455124855	3.15360999107	3.31372666359
164030	3.49941802025	3.15870189667	3.30948424339	3.80949139595	3.4743309021	3.39080643654
164131	3.47704076767	3.1589577198	3.31485390663	3.38926625252	3.15134119987	2.95555925369
164939	3.3834695816	3.31677746773	3.3525698185	3.24342060089	2.93395137787	3.10548019409
165032	3.33528804779	3.13025379181	2.94452571869	3.33147740364	3.02654337883	2.84430265427
165840	3.23998880386	3.2351360321	3.39290237427	3.84454846382	3.77700805664	3.57983136177
166438	3.35440707207	2.92176604271	2.87089467049	3.1958990097	3.06140112877	3.08264756203
167036	3.77136921883	3.88956022263	3.71236228943	4.07627916336	3.947742939	3.68503808975
168341	3.64218139648	3.67875242233	3.56645417213	3.62535452843	3.60518670082	3.71175646782
169343	3.58947896957	3.48460149765	3.31202816963	3.92253708839	3.47714591026	3.34953260422
169444	4.07555818558	3.71327900887	3.48540282249	3.94096183777	3.77438950539	4.12124156952
170934	3.57191610336	3.10964035988	2.90108919144	3.59228467941	3.32535076141	3.22706723213
171633	3.9560983181	3.62277531624	3.65340900421	3.95893955231	3.71674275398	3.57619357109
172029	3.36125040054	3.02221560478	3.22716760635	3.46899628639	3.26233172417	3.28706026077
172130	3.5758793354	3.5672454834	3.6987426281	3.78233933449	3.6706662178	3.6891746521
172332	3.81142616272	3.62820601463	3.82541894913	4.12569332123	3.6798453331	3.49499201775
172534	4.01793622971	4.0327539444	3.78988313675	4.16203022003	3.90658760071	4.15193223953
172938	3.84776473045	3.55979466438	3.71696376801	3.89381051064	3.54863095284	3.55336785316
173334	3.59176015854	3.18372488022	3.21221733093	3.78538703918	3.53079867363	3.43947792053
173435	4.16610336304	3.94285345078	3.9501376152	3.89184355736	3.8397758007	4.08425283432
173536	3.61909198761	3.22171497345	3.34851288795	4.04696369171	3.85000920296	3.56313943863
173940	3.61929941177	3.51266336441	3.36694359779	3.61746525764	3.4953494072	3.63009476662
175035	2.89332890511	2.83938145638	2.83143663406	3.15794110298	2.87595105171	2.56382703781
175439	3.70912599564	3.33619022369	3.32410812378	4.07303476334	3.66466832161	3.47885251045
176542	3.46566748619	3.43776869774	3.43833947182	3.73416471481	3.34770488739	3.11090993881
177645	3.93459606171	3.76955485344	3.83737516403	3.91009902954	3.91424751282	3.61822509766
177746	4.14225053787	3.79807591438	3.76204943657	3.90815544128	3.93107128143	3.86934638023
178142	3.79132580757	3.68445014954	3.82360649109	3.75506520271	3.37200498581	3.14292025566
178849	3.31970524788	3.03834176064	3.11843347549	3.39921331406	3.07200932503	2.86431598663
179346	3.65933799744	3.54721927643	3.67160081863	3.81054091454	3.84887218475	3.46760344505
180129	3.49412035942	3.16595768929	3.14645624161	3.95842719078	3.32782840729	3.28476786613
180432	3.82686042786	3.68601632118	3.50631737709	3.89034676552	3.83929824829	3.87982106209
180836	4.03528547287	3.62454867363	3.5393435955	4.38233709335	3.77913331985	3.05194449425
180937	3.40297603607	3.07436871529	3.17256093025	3.68530845642	3.26040077209	3.20993590355
181131	3.68191003799	3.43556785583	3.51306009293	3.8813765049	3.35252904892	3.41803193092
181232	3.67750549316	3.33130979538	3.07859015465	3.71027207375	3.34821391106	3.40254950523
182739	4.20925617218	3.91136264801	4.23188591003	4.08796739578	3.94589543343	4.08331298828
182840	3.70632076263	3.44217777252	3.68296289444	3.43470954895	3.14482545853	3.16946434975
183034	3.64354753494	3.23591971397	3.10971617699	3.60418343544	3.3648891449	2.94820857048
185139	3.84211564064	3.57042384148	3.31668615341	3.57860183716	3.31113791466	3.16572189331
185442	3.20560503006	2.99294734001	3.08635497093	3.34474849701	2.97487783432	2.97412037849
186141	3.25914859772	3.09358263016	2.91187000275	3.79578828812	3.27465009689	2.98433351517
187547	4.36318206787	3.94098186493	3.74003171921	4.29791784286	4.00477409363	3.98671269417
187850	3.45424365997	3.12178754807	3.43623423576	3.82609963417	3.42169475555	3.16309690475
188347	4.02753591537	3.56797170639	3.65496993065	4.45535898209	4.10912466049	3.91648721695
189349	3.90951919556	3.34792113304	3.28649616241	3.83914351463	3.52135133743	3.66871285439
190031	3.89444613457	3.48324513435	3.47695946693	4.04224157333	3.95797324181	3.85079789162
191033	3.71724700928	3.33834290504	3.38749504089	3.84653306007	3.5537109375	3.53159594536
191336	3.69269156456	3.38338804245	3.51929712296	3.78061652184	3.53586363792	3.39430212975
191437	3.84167861938	3.5951397419	3.38502264023	3.91089844704	3.86978435516	3.89092230797
191841	3.74956846237	3.4540848732	3.36430478096	3.75790715218	3.48686122894	3.36130547523
192540	3.60950994492	3.43693113327	3.48968791962	3.6873819828	3.41567587852	3.37627506256
192843	3.46535849571	3.15783953667	3.5091688633	3.43513798714	3.14584803581	3.13903236389
194140	4.19939804077	3.94214105606	4.02770662308	3.88543057442	3.72094917297	3.58569359779
194645	3.21270942688	2.79825472832	2.79824280739	3.24260163307	3.12228012085	2.8935110569
194847	3.94317102432	3.70036745071	3.45558595657	3.94711661339	3.90664243698	3.5401070118
195041	4.10866260529	3.61411499977	3.69884061813	3.86181378365	3.58335256577	3.57216215134
195647	3.98035788536	3.70425748825	3.8491897583	4.268846035	3.99886012077	4.16276931763
195849	3.30128145218	3.02506947517	3.26393342018	3.61858201027	3.43881773949	3.44923305511
196144	4.23274946213	3.83042120934	3.89479732513	4.35287380219	4.0723400116	4.17911720276
196750	3.49921703339	3.46793627739	3.49528169632	3.50771927834	3.35792994499	3.2455265522
197348	3.74678134918	3.24063944817	3.23322153091	3.80733585358	3.59170603752	3.272387743
198350	3.79864597321	3.49518728256	3.3997232914	3.80632305145	3.5676202774	3.380661726
198451	3.28104162216	3.05765032768	2.97431254387	3.39279747009	3.25141334534	3.21608829498
198855	3.44229483604	3.26641345024	3.18489933014	3.83007216454	3.4992043972	3.57847476006
199150	3.80548667908	3.59058713913	3.36004662514	3.68883824348	3.39168667793	3.28795456886
199453	3.82766723633	3.65681004524	3.61254024506	3.40601158142	3.34429216385	3.34532356262
199655	3.67090749741	3.33200073242	3.39631295204	3.75361251831	3.58574652672	3.55502867699
199958	3.42412185669	3.1737651825	2.98168492317	3.58828234673	3.31261372566	3.22018194199
200109	3.95174455643	3.51701235771	3.23222279549	4.22463464737	3.956635952	3.47712945938
200614	4.00349283218	3.67190361023	3.56999588013	3.98312997818	3.51597738266	3.30659341812
201111	3.27430653572	2.9665184021	2.96681714058	3.12311768532	3.09031677246	3.14732313156
201414	3.32303333282	3.15005731583	2.89796829224	3.36644482613	3.05727410316	2.70781564713
201818	3.57982206345	3.53813409805	3.43730902672	4.05807161331	3.80817532539	3.71296286583
203418	3.35264754295	3.23317837715	3.07160830498	3.57301211357	3.36769747734	3.15390348434
204016	3.66650247574	3.53886675835	3.85335659981	3.96164369583	3.59324240685	3.39149332047
204521	3.74961590767	3.61747479439	3.7850792408	4.08325958252	3.86365890503	3.59949064255
205119	3.49188947678	3.30582332611	3.52545380592	3.42387843132	3.21123027802	3.25530171394
205220	3.51638174057	3.29380536079	3.34015750885	3.64074516296	3.35619115829	3.34573030472
205725	3.39835357666	3.36486458778	3.40560650826	3.65602755547	3.46166706085	3.64502120018
205826	3.62179136276	3.47234416008	3.33392214775	3.7943675518	3.36559987068	3.200984478
208226	3.85557723045	3.55577778816	3.22297739983	3.64142608643	3.31265521049	3.55033278465
208327	3.36157846451	2.92604494095	2.79929184914	3.6295633316	3.08598613739	2.91125798225
209935	3.49455833435	3.13551497459	3.38095855713	3.68106222153	3.36683249474	3.08617424965
210011	3.24841618538	3.22746515274	3.10525536537	3.53214669228	3.30010986328	3.2544670105
210415	4.10266160965	3.47961115837	3.23519086838	4.34088754654	3.92005848885	3.54559254646
210617	3.81313323975	3.53653740883	3.31030440331	4.11951112747	3.67263674736	3.26020646095
211215	3.63703989983	3.14081740379	3.14986491203	3.69248986244	3.2492389679	3.21011567116
211316	3.23787140846	2.99293828011	3.15502357483	3.27704596519	3.09071040154	2.75640821457
211417	3.7286567688	3.41294193268	3.43259620667	3.89012813568	3.65717625618	3.56745481491
211720	3.01394152641	3.17207241058	3.4172334671	3.37402582169	3.27367305756	3.27761411667
211922	4.00934028625	3.57530975342	3.70831751823	3.76642274857	3.69596552849	3.61027240753
212116	3.61692786217	3.29750752449	3.38858175278	3.3551838398	3.17899155617	3.15667748451
212217	4.23404788971	3.89106416702	3.70531725883	4.19719076157	3.84596395493	3.59795403481
212318	3.60123729706	3.33513689041	3.47861409187	3.79451823235	3.44979310036	3.48482608795
212419	3.77702856064	3.38740921021	3.4680109024	4.137840271	3.69043064117	3.44183492661
214019	4.24088382721	3.78657388687	4.0594701767	4.08154296875	3.84334373474	4.17315387726
214221	3.52170372009	3.25191354752	3.44121003151	3.94772791862	3.59854912758	3.31595158577
214423	3.17694664001	3.0304312706	2.87831234932	3.3344142437	2.93206524849	2.97610092163
214726	3.64625144005	3.33411860466	3.30828285217	3.72069239616	3.44601893425	3.08808326721
217126	3.46700930595	3.16191363335	3.10822939873	3.17776942253	3.11363863945	3.11894226074
217429	4.01033449173	3.57486915588	3.53403663635	3.74213838577	3.66540074348	3.59659075737
221319	3.70964384079	3.34952425957	3.43417596817	3.90071702003	3.46953105927	3.19876360893
224022	3.34731054306	3.25131201744	3.42349171638	3.73007321358	3.66055798531	3.57307362556
231928	3.70980072021	3.30282354355	3.35511136055	4.01759767532	3.77655887604	3.44082427025
233326	3.88806295395	3.51458239555	3.7369146347	4.02163553238	3.62373733521	3.43114495277
239944	3.46689772606	3.36944413185	3.19835090637	3.82360506058	3.50631833076	3.43809890747
246133	3.53812646866	3.46755051613	3.33442997932	3.93864607811	3.69048786163	3.46616315842
250427	3.97779893875	3.74046158791	3.74143028259	4.06128501892	3.65935850143	3.82144355774
250932	4.04124641418	3.8621506691	3.84388256073	3.85921883583	3.7388253212	3.63802886009
251833	3.59760403633	3.3268392086	3.27604794502	3.80695104599	3.61869359016	3.48618721962
255639	3.47014570236	3.23586130142	2.87733054161	3.31418657303	2.82383871078	2.53845214844
256540	3.7052500248	3.43592238426	3.12894320488	3.90122580528	3.34923291206	2.89460897446
280739	3.52966666222	3.34261488914	3.56142187119	4.04450941086	3.45610237122	3.40085697174
284646	3.20264625549	3.10137915611	3.04371070862	3.28567218781	2.9910633564	2.90521979332
285345	3.65004205704	3.29798531532	3.48864817619	3.64661693573	3.25162363052	3.13730788231
285446	3.34000062943	3.10248041153	2.85891103745	3.60500216484	3.49250984192	3.32593750954
289555	3.46051883698	3.29323077202	3.40778899193	3.80050086975	3.70090460777	3.65667271614
290136	3.53725147247	3.2013759613	3.22952914238	3.32529401779	3.1944861412	3.31651425362
293748	3.73030018806	3.43084073067	3.13060069084	3.7978951931	3.65524816513	3.55107760429
298051	3.96936917305	3.39173436165	3.47228503227	3.76619052887	3.58315086365	3.52043700218
298455	3.48409867287	3.15493488312	3.33218193054	3.40362644196	3.00846910477	2.93804836273
303119	3.78450369835	3.3601911068	3.58751916885	3.86708593369	3.52768731117	3.09380483627
303624	3.8870446682	3.3703584671	3.06537938118	3.38131761551	3.01786994934	3.15028214455
304020	3.39701008797	3.10220193863	3.17903780937	3.33066773415	3.053388834	3.178855896
307127	3.76139092445	3.36203074455	3.60899400711	3.80349063873	3.52778410912	3.50176334381
308331	3.26507496834	2.75982904434	2.6841313839	3.28804588318	3.15494179726	2.95865225792
310621	3.72234940529	3.83844447136	3.56630778313	4.26113510132	3.97919392586	3.65892386436
316633	3.60344672203	3.36923623085	3.10978317261	4.04502439499	3.68305468559	3.55159854889
334635	3.20263648033	2.89330649376	2.71159505844	3.31003451347	3.10683393478	2.93129849434
339847	4.12185382843	3.77484869957	3.91515564919	4.10630369186	3.93112564087	3.9068505764
351938	3.58623504639	3.65041565895	3.62229585648	3.64669489861	3.61897230148	3.63816428185
352132	3.34237527847	3.15045189857	3.35464715958	3.73064637184	3.38654994965	3.43117141724
361941	3.56218218803	3.4356367588	3.32947921753	3.52013230324	3.20611643791	3.11132717133
365343	3.42503428459	3.21559262276	3.36235547066	3.78064036369	3.35306167603	3.22792077065
366042	3.41757678986	3.35140323639	3.33584785461	3.54439306259	3.45482110977	3.31092333794
366446	3.46613526344	3.30603480339	3.28307199478	3.36952638626	3.37284517288	3.24360179901
371843	3.39008617401	3.21383571625	3.08285808563	3.61855101585	3.24663710594	3.35115647316
377451	3.99319934845	3.70497107506	3.50845170021	4.11504983902	3.86334967613	3.77882266045
380036	3.4139444828	3.25148057938	3.50005888939	3.45892238617	3.15124797821	3.34742379189
385450	3.24592447281	2.97892856598	3.0081114769	3.38733386993	3.13023734093	3.22662734985
386250	3.56960701942	3.23144435883	3.43301057816	3.44356679916	3.21639251709	2.98013281822
390645	3.17967271805	3.1369125843	3.2083170414	3.3809325695	3.06426692009	2.96233677864
395958	3.57610869408	3.25679683685	2.95822381973	3.70384812355	3.45182919502	3.06068396568
397154	3.84413957596	3.65009593964	3.26117753983	3.90199184418	3.60216569901	3.48572134972
397760	3.69836235046	3.32595825195	3.56706762314	3.96975827217	3.48088598251	3.59265971184
397861	3.43027281761	3.22744822502	3.5130405426	3.28050398827	3.14590525627	3.3022646904
412528	4.20726013184	3.70839452744	3.6195397377	4.35342168808	3.95811319351	3.61232948303
414229	3.40163230896	3.17491936684	3.18587636948	2.93308496475	2.79533004761	2.81410837173
415837	3.36851024628	3.15335011482	2.8135342598	3.48012924194	3.32706618309	3.23348021507
422632	3.54182863235	3.4536190033	3.75046682358	3.91481399536	3.41678476334	3.58279109001
433839	3.3330283165	3.16005206108	3.0537109375	3.25941991806	2.98637318611	3.05887699127
436239	3.99390602112	3.81580424309	3.67058730125	4.14104795456	3.88156294823	3.49166750908
436845	4.35405254364	3.7897977829	3.89565229416	4.01927709579	3.68904018402	3.6160326004
441939	3.66275787354	3.39360523224	3.51111865044	4.08942699432	3.61076569557	3.76890301704
445543	3.23862695694	3.01090526581	3.11358189583	3.40938472748	3.09264111519	3.0055565834
448347	3.35509800911	3.08013153076	3.06425213814	3.36755752563	3.10911607742	3.19829249382
465852	3.59917664528	3.17804694176	3.21899437904	3.70893335342	3.25947761536	3.09732532501
473952	3.66323566437	3.53580713272	3.8529586792	3.80519580841	3.64081549644	3.59714531898
479762	3.49373531342	3.21076250076	3.13811397552	3.59041023254	3.21900677681	3.32695388794
480141	3.53455686569	3.23183894157	3.22561883926	3.6726808548	3.58237409592	3.15742397308
485757	3.24274039268	3.04955124855	3.01252055168	3.80834674835	3.60050058365	3.16556668282
486759	3.29329204559	2.99834346771	3.13138604164	3.06399059296	3.07984519005	3.11127209663
497865	2.95170807838	2.86057758331	3.05815815926	3.14738678932	2.89922404289	2.82732987404
499566	4.07281446457	3.46731686592	3.30187702179	3.89528608322	3.67110824585	3.48670744896
500222	3.65348815918	3.37692928314	3.30832028389	3.88499546051	3.5992538929	3.69086647034
510326	4.2377038002	4.00527477264	3.8129761219	4.4118976593	4.30337953568	4.26307582855
519950	3.48210835457	3.3266749382	3.06409597397	3.95905184746	3.65064787865	3.28936171532
522434	4.20708799362	3.9199924469	3.73842597008	3.93664813042	3.73423361778	3.8334774971
530635	3.59308552742	3.24532699585	3.30745768547	3.65538191795	3.28409409523	3.27628421783
531536	3.43097472191	3.26818275452	3.41976118088	3.76817345619	3.64577817917	3.54653573036
540436	3.17806649208	3.15448212624	2.97092008591	3.68567752838	3.56406211853	2.97288227081
541943	3.56608581543	3.34794163704	3.04700684547	3.27707886696	3.37445211411	3.63009667397
545345	3.7034444809	3.18259692192	3.20525598526	3.67220568657	3.38699364662	3.37092137337
547046	4.00937891006	3.65406489372	3.59028124809	3.97427582741	4.01647377014	4.01219701767
561242	3.41448116302	3.25822257996	3.35949683189	3.3862862587	3.38213229179	3.34126734734
562446	3.82395195961	3.37393736839	3.13426089287	3.72212600708	3.57373833656	3.25076246262
565452	3.7144048214	3.33081889153	3.00994968414	3.53379821777	3.35914063454	3.161257267
566454	3.65367650986	3.48151493073	3.52982163429	3.80976057053	3.54035544395	3.2766559124
567052	3.62174081802	3.67738080025	3.54435348511	3.8220345974	3.51466393471	3.54847717285
567961	3.87090468407	3.65960049629	3.37708830833	3.96941637993	3.6155128479	3.11850357056
568963	4.02606153488	3.5467042923	3.42702794075	3.91307687759	3.6014957428	3.44172716141
570243	3.72802329063	3.61646223068	3.47131896019	3.97511219978	3.99875259399	4.05305767059
571548	2.92369270325	2.91887664795	2.84297966957	3.38975119591	2.92900204659	2.9589369297
573451	3.56721615791	3.53492808342	3.22615265846	3.62275958061	3.46962881088	3.38625812531
580044	3.69859719276	3.52039361	3.47528743744	3.71597480774	3.62668800354	3.79970955849
580347	3.76467466354	3.25826573372	3.35259771347	3.59866857529	3.37973165512	3.23334240913
581349	3.94453811646	3.82797765732	3.8097858429	3.96395301819	3.84149765968	3.61770510674
583858	3.5602722168	3.27123498917	2.99516129494	3.58917760849	3.30539703369	3.0176627636
586460	3.7054848671	3.5320084095	3.42935109138	3.76597476006	3.59911966324	3.62416124344
594156	3.64037084579	3.42095828056	3.26942300797	3.63521361351	3.61603069305	3.22146081924
598568	3.96984028816	3.68774318695	3.25321054459	3.58556199074	3.62662315369	3.46415948868
599469	4.19579315186	3.92405104637	3.96205472946	3.53435897827	3.54197239876	3.91706871986
599671	3.4518699646	3.1816675663	3.16457772255	3.59875130653	3.12312507629	3.17394638062
622236	3.33814549446	3.14436221123	3.38921403885	3.46147632599	3.3981795311	3.29613876343
623844	3.36519122124	2.90064477921	2.8365380764	3.36097216606	3.20853209496	3.05624818802
627549	3.58262634277	3.33668375015	3.28719997406	3.4859790802	3.27171492577	3.14071893692
638049	3.89643716812	3.40019464493	3.40341329575	4.14438152313	3.64820218086	3.65936493874
645551	3.37315392494	3.20940065384	3.28529000282	3.55977725983	3.41172671318	3.37321376801
665254	4.26883125305	3.80806684494	3.91873407364	4.320353508	3.95038175583	3.7282948494
672756	3.48962545395	3.23312067986	3.30771970749	3.87717962265	3.4592757225	3.37793421745
673455	3.61789560318	3.87802577019	3.85437369347	4.23719072342	3.70699048042	3.52807474136
677968	3.73891091347	3.70731425285	3.97547340393	3.65556335449	3.54384183884	3.66883730888
679568	3.11675310135	2.91903972626	3.02212166786	3.17465305328	2.93474841118	2.95737504959
680957	3.6155462265	3.10612273216	2.91021537781	3.56979393959	3.06266450882	2.86748814583
683256	4.01565742493	3.7298822403	3.58383893967	3.66661119461	3.45027756691	3.48840165138
685058	2.8552737236	2.92731165886	2.82184720039	3.10767674446	2.81110811234	3.04355025291
687163	3.47458791733	3.21603107452	3.23537158966	3.73401618004	3.37730288506	3.36060833931
690152	3.69570875168	3.38371229172	3.29080939293	3.59041953087	3.41299009323	3.57510066032
695768	3.81129813194	3.28904128075	3.40442299843	3.65224051476	3.64872097969	3.68983387947
702133	3.47001361847	3.19283604622	3.33685231209	3.79025840759	3.52028417587	3.30169296265
704238	3.20541954041	3.12871170044	3.1757004261	3.72670817375	3.32710003853	3.28961277008
705341	3.1840865612	2.88337349892	3.18461370468	3.49217844009	3.07261896133	3.26392579079
709551	3.09657335281	2.83240270615	3.01645517349	3.1826364994	3.04683947563	3.02423810959
713239	3.72311425209	3.41915392876	3.22039413452	3.74259209633	3.29416680336	3.3115606308
715647	3.66700196266	3.40042948723	3.4295167923	3.34256577492	3.23093008995	3.29918169975
729254	3.54979753494	3.59545636177	3.73334813118	3.91566514969	3.57036733627	3.61374092102
729557	3.93366527557	3.63328289986	3.73259592056	4.60231924057	4.02899312973	3.6207447052
732243	3.95794606209	3.560120821	3.684445858	3.82270479202	3.67340922356	3.49953603745
742549	3.41403651237	3.2355222702	3.31842303276	3.37699699402	3.13758182526	3.21730804443
748258	3.58014655113	3.32092833519	3.22308182716	3.41553354263	3.37278270721	3.26623821259
748662	3.86094379425	3.45680880547	3.35395526886	3.7561712265	3.14381742477	3.16832017899
751348	3.40257048607	3.41106915474	3.3840034008	3.72081279755	3.35148119926	3.14741659164
756055	3.03149795532	3.08123874664	3.09033608437	3.20363163948	3.17498087883	3.10776782036
759869	3.21830582619	2.80876231194	2.88584065437	3.3021402359	2.89442014694	2.92746591568
761957	3.91501569748	3.7804608345	3.73636317253	4.4582567215	4.18695306778	3.64797234535
765056	3.29064488411	3.16050958633	3.16671609879	3.41683197021	3.23347306252	2.82993221283
770352	3.59197878838	3.32190728188	3.02366924286	3.04870486259	2.90313196182	2.79202461243
771354	3.57225656509	3.11977553368	3.1300740242	3.55723333359	3.34530854225	2.93296861649
779370	3.88624835014	3.46618413925	3.14692950249	3.53953719139	3.11727452278	3.00928640366
782561	3.47535514832	3.26493191719	3.1554646492	3.65380620956	3.28783321381	3.36953306198
784565	3.85132956505	3.62479114532	3.56621456146	4.01618242264	3.77749109268	3.98414087296
786569	3.83761286736	3.38361215591	3.01240086555	3.67691111565	3.38440155983	3.6120429039
788876	3.6216135025	3.34966349602	3.23950791359	3.75033092499	3.39330148697	3.30868053436
789373	3.51373577118	3.34766936302	3.48647403717	3.69862699509	3.56690621376	3.48999333382
792564	4.14507102966	3.68286681175	3.75412964821	4.05186033249	3.77223515511	3.92683529854
802844	3.37952709198	3.30595946312	3.51565790176	3.42900371552	3.08795785904	2.83543682098
816653	3.65702462196	3.63069462776	3.54215526581	3.97151303291	3.59247565269	3.30764317513
826353	4.36402225494	4.15175151825	4.20027637482	4.37821531296	4.03258228302	4.29858779907
826454	3.54244017601	3.52307844162	3.46627235413	3.95744156837	3.69484305382	3.73675870895
833148	3.3103325367	3.19877791405	3.2495868206	3.56912088394	3.37141370773	3.30367207527
833249	3.33255457878	3.14162445068	3.1641523838	3.6516149044	3.20705723763	3.07378363609
837560	3.46434497833	3.11875081062	3.1632578373	3.46743440628	3.24052453041	3.33749055862
837964	4.09877443314	3.46663737297	3.48483633995	3.81739664078	3.3906443119	3.31647396088
845458	3.50066566467	3.37062168121	3.20167756081	3.97042059898	3.68057870865	3.25438904762
849971	3.57493972778	3.476085186	3.40874958038	3.830732584	3.56782722473	3.36885881424
856766	3.53095006943	3.23183870316	3.28329944611	4.09402894974	3.75244784355	3.38541984558
857263	3.65283536911	3.45368266106	3.35238337517	3.78499269485	3.57581400871	3.65263104439
859671	3.74172401428	3.19830417633	3.26295852661	3.40469717979	3.22615027428	3.24098277092
861456	3.93324041367	3.65486979485	3.48103427887	4.2344827652	3.69905090332	3.3892455101
865363	3.76907801628	3.22393131256	3.03500747681	3.66038990021	3.45782327652	3.53404068947
871762	3.31856799126	3.07264709473	3.09660243988	3.75980496407	3.30498361588	2.79690909386
871964	3.3537170887	2.97976899147	3.04323124886	3.36204862595	2.96286463737	2.8157954216
872158	3.912368536	3.44337558746	3.70015025139	3.76181745529	3.41952109337	3.70162844658
877168	4.3074836731	4.25596761703	4.16816759109	4.22146463394	3.8250079155	3.63377594948
877269	3.80475568771	3.40897369385	3.28288936615	3.93116354942	3.85049843788	3.71487855911
885975	3.92724728584	3.51313734055	3.21685314178	3.85045409203	3.5996119976	3.58204078674
887373	3.47351455688	3.30002403259	3.34633612633	3.94519066811	3.56348395348	3.48107361794
889579	3.55443811417	3.40881824493	3.40836191177	3.29258203506	3.06307935715	3.3441157341
894673	3.51861023903	3.49475765228	3.47398209572	4.03010559082	3.66711044312	3.49320483208
896778	3.37034368515	3.20597195625	3.34433507919	3.81883096695	3.56949019432	3.51978874207
896879	3.56972384453	3.16803026199	2.98147368431	3.91076231003	3.54497551918	3.38932085037
898176	3.37185311317	3.0551712513	3.14452600479	3.78619146347	3.31724071503	3.12828755379
899885	3.90227150917	3.63759970665	3.664239645	4.15302276611	3.53005003929	3.2432911396
901139	3.74306201935	3.5278069973	3.33184719086	3.73476195335	3.53944849968	3.69435119629
901442	3.81967043877	3.40085268021	3.48880434036	4.03941679001	3.61827421188	3.43106842041
904044	4.03674840927	3.83338069916	4.16799020767	4.28405714035	4.06831264496	3.73468923569
907656	3.61993479729	3.33734536171	3.40487003326	3.99626111984	3.53244233131	3.41630530357
910241	3.52547860146	3.23796224594	3.50348329544	3.44821429253	3.2391564846	3.37225222588
912447	3.484177351	3.04115533829	3.41768956184	3.44069623947	3.17273640633	3.22408461571
917255	3.57259345055	3.3764872551	3.44981503487	3.5232656002	3.43333387375	3.56905031204
922854	3.2390332222	3.11224532127	3.12300801277	3.40304970741	3.08497881889	2.70312976837
930449	3.59113764763	3.22502422333	3.17060542107	3.65806794167	3.46761035919	3.63074302673
932554	3.78403759003	3.32741308212	3.2735106945	3.77055883408	3.45473480225	3.25833630562
937160	3.81927967072	3.80135989189	3.75567150116	3.71167826653	3.30756211281	3.14982223511
957974	3.78605246544	3.59824419022	3.65508818626	4.00477552414	3.69546675682	3.67927742004
958976	3.36977958679	3.10020208359	2.78559970856	3.57511615753	3.17276191711	2.91902327538
959574	3.86587667465	3.56298136711	3.58394384384	3.80682420731	3.74013257027	3.40530276299
965367	3.13763976097	2.94843578339	3.0575067997	3.61244535446	3.19885253906	2.81184434891
965771	3.23379302025	2.97197246552	3.02200818062	3.25317358971	3.20569229126	3.0408744812
978578	3.65446424484	3.582228899	3.86436653137	3.77732992172	3.53044462204	3.53691959381
983773	3.40064549446	3.156904459	3.28057599068	3.54531097412	3.17884707451	3.0864572525
984472	3.62157440186	3.36540770531	3.33260893822	3.91613268852	3.34652853012	3.54311227798
987983	3.3519244194	3.08400344849	3.06008505821	3.51465368271	3.30634450912	3.21101427078
991267	3.5487177372	3.40711450577	3.56284189224	3.57135558128	3.29499840736	3.40537643433
992774	3.84898376465	3.6608645916	3.59511566162	3.58503818512	3.72474455833	3.9116897583
994273	3.76920294762	3.5494658947	3.73459291458	3.69805431366	3.29569506645	3.51530742645
