# Supplementary material for: Microstructural organization of human insula is linked to its macrofunctional circuitry and predicts cognitive control
Source: eLife. 2020 Jun 4;9:e53470. doi: 10.7554/eLife.53470 (PMC7308087; doi:10.7554/eLife.53470)
Supplement: Figure 2—source data 2. [file elife-53470-fig2-data2.csv]

subjId	lPI	ldAI	lvAI	rPI	rdAI	rvAI
146432	3.67367988082	3.31729386648	3.40502129193	3.67886177822	3.53033260579	3.61904910608
205826	3.87669116007	3.66727571896	3.53510993078	3.95761169962	3.94577415723	3.7695443587
214019	4.45172926364	4.24707312768	4.08594858877	4.66507570138	4.20368163926	4.03103373393
129028	3.87773425658	3.68384310218	3.45578664321	3.69367608293	3.46050597008	3.37055312365
685058	3.40719171898	3.16319817809	3.05056942785	3.14889998788	3.21506097905	3.00358919772
573451	3.77744160437	3.64598158967	3.60662255095	3.85962148119	4.0024475732	3.71601914792
303119	4.27235564129	3.66826407541	3.42164351547	4.10561085413	3.78996058123	3.78145585529
436239	4.29434838051	4.16426006101	3.61744231613	4.23184614547	3.96932685415	3.7700206375
209935	3.78676611625	3.41137468404	3.21248289356	3.54462940385	3.11696589534	3.47222270288
901139	4.05091152362	4.04590168869	3.91557179988	4.12114643872	3.97410126498	3.90152536811
123925	3.99631600649	3.72326464722	3.38422183812	3.71695305655	3.57975862844	3.6693433302
106521	3.53326011501	3.34358226275	2.98783417834	3.56722250999	3.48883298599	3.56024126495
119833	3.52461068015	3.39026829487	3.33287730059	3.62252902249	3.43897555418	3.42429904985
192540	3.95695920131	3.77602970186	3.69852863941	3.90680090392	3.78227173732	3.63513070713
802844	3.54491135449	3.24175660383	3.15719578408	3.58382258324	3.51401809072	3.63214160933
101410	3.67642590042	3.28089436905	3.07223512148	3.45353202102	3.18988842003	3.16312832665
149539	3.95976346233	3.56008486194	3.63128053592	3.84260812273	3.58752875232	3.80701274845
991267	3.97415555416	3.64835895776	3.70140719557	4.00204927933	3.71537735992	3.96820105716
136227	3.64711037645	3.26436009883	3.2056476733	3.44598523965	3.35523993547	3.32380096482
217126	3.4498907993	3.30422780614	3.26681514845	3.62108011705	3.53683383355	3.21651121134
849971	4.00007796131	3.69005666885	3.28019849674	3.78390717747	3.65562852931	3.51296662821
250932	3.94321722234	4.00675547684	3.83672721826	4.24048822002	4.22137742137	4.13196306442
135225	4.33873938525	4.29204371411	3.9230967575	3.94310159303	3.71429885552	3.57108769493
687163	3.88566505159	3.54534448252	3.36714723714	3.59844227559	3.35455217897	3.67353775803
759869	3.34042468812	3.32818118588	3.19352838148	3.30397640101	3.11475485807	3.08501636089
160830	3.97593208802	3.73578781973	3.60333260968	3.9455852349	3.72456855938	3.3908681135
195647	4.49094169337	4.482622692	4.16792709278	4.23257505074	3.99654974043	4.02130149637
912447	3.47976893915	3.2918883141	3.27664170964	3.55898263693	3.36810509426	3.51849726492
298051	4.10083095056	3.68985741623	3.55433383062	4.10343782947	3.77135194093	3.59004409432
151627	4.22348750539	4.13896411189	3.55726233081	4.21422421402	3.90642985526	3.59020164613
164939	3.43402529146	3.1404040787	3.09676228454	3.54967867692	3.5530861508	3.61414114415
677968	3.98608107081	3.86107600777	3.75487429736	4.05840095082	3.95792521389	4.2292785031
531536	4.14243396042	3.81025690286	3.6555744373	3.79129427545	3.61984301442	3.61381973749
732243	4.11518930536	3.98866815206	3.6916932331	4.18356571678	3.87232303677	3.59305827174
865363	3.96703658939	3.67093119131	3.62484522512	3.89430315594	3.58328422864	3.57205063718
194645	3.54750125268	3.37692552719	3.09253905465	3.44054299339	3.10887809534	2.92643893816
826454	4.20678758412	4.01133279087	3.76598148847	3.7588626894	3.69492157573	3.76369029891
959574	4.1738934147	4.03303169394	3.65815056613	3.99746082884	3.75599928001	3.85191198818
561242	3.8128329568	3.73112294186	3.44703566044	3.56448564373	3.41945195711	3.43505796098
201818	4.12262818531	4.03083301704	3.71732057726	3.93681050323	3.70738370924	3.54403598666
210011	3.61690619616	3.3763427843	3.40873910907	3.45603870934	3.28018245905	3.48082600708
415837	3.9935068415	3.6550217035	3.52915945848	3.67969594051	3.48128641475	3.35027764236
150625	4.02403074587	3.91279070421	3.53610180289	3.81810248619	3.75222172334	3.45765689054
172130	4.05610847603	3.97422921888	3.69207987463	3.93691637352	3.90049812706	3.78632681887
185442	3.55421268507	3.32976794316	3.19178698996	3.53687802129	3.37808480365	3.47346538179
638049	4.28551259425	3.87039348084	3.77456311569	4.07906147421	3.68163225538	3.77035118127
761957	4.60198933686	4.44550419721	3.83904148385	4.19299267929	4.02545080222	3.58775453725
111716	4.72365861088	4.47095379161	3.81767938089	4.27619587931	4.08342305982	3.80637943699
445543	3.50208770894	3.38495177884	3.18079002511	3.31476504678	3.12171214569	3.3278033609
779370	3.95860559872	3.4879838574	3.20520622224	4.26913442643	3.88374596753	3.75153696402
308331	3.65552905823	3.5288834568	2.99798827611	3.4388710341	2.94867934744	3.09780891784
141422	4.00438477408	3.80331651383	3.58503799286	3.88857844531	3.81368302728	3.96797989389
154734	3.65709772445	3.57202022172	3.28788371733	3.53089708373	3.5245901865	3.75510524876
748662	3.9447431789	3.71546606178	3.45367037195	3.97174970719	3.79954010733	3.59139431608
167036	4.38444588844	4.15539183368	3.73713120231	4.11670068046	3.86300317344	3.6919781896
128127	4.05639815895	3.80129321973	3.67779412085	3.99061276367	3.63735588585	3.39630127462
765056	3.72253138512	3.37832408575	3.19643857975	3.53905807555	3.53021611736	3.63124944123
898176	3.94864903706	3.52609346402	3.43762666177	3.56267715721	3.2088354144	3.44897373626
371843	3.90415091644	3.6460703853	3.53627753698	3.80160414996	3.61520716594	3.65571293586
140420	3.92930514641	3.90544751248	3.61852102235	3.83707035381	3.58891318537	3.53286050069
380036	3.68541816704	3.58439185424	3.46533449532	3.66781280346	3.57290018144	3.59372234987
221319	3.88617418433	3.56069408915	3.33374476378	3.82252263733	3.52538944692	3.72339928155
786569	4.23823750838	4.1698400734	3.84434244501	4.10321927302	3.77658232378	3.25539014254
965771	3.50031453958	3.24296160615	3.21287771341	3.45301036449	3.28635324619	3.19307732158
196750	3.78529390362	3.72625500134	3.47161292051	3.84238181169	3.63856643253	3.85724468264
131217	3.93057931744	3.78893781105	3.99106011444	4.23761558924	4.20560092333	3.9928180573
179346	4.07205336334	3.91440047114	3.6423300225	3.98052121113	3.97195837744	3.99885761707
118932	3.92302904844	3.5337020927	3.46106030638	4.04782763778	3.51990408311	3.59016504724
212116	3.59782191683	3.47701712521	3.09599808101	3.78895893648	3.4676192906	3.43806534398
742549	3.51655162723	3.25188125979	3.23123979134	3.56716343219	3.37778337205	3.54112798833
187547	4.53428716521	4.1917053516	4.00280735871	4.48270072376	4.04357947755	3.71206270249
571548	3.45265559329	3.22540933554	3.4870505294	3.19014835754	3.19526008705	3.17051815035
280739	4.21119265486	3.95591154795	3.52904870791	3.90037887112	3.5379908245	3.61339879149
729254	4.0726571481	3.69941427428	3.46450273298	3.79273730155	3.63078461173	3.85170852355
165032	3.59998100553	3.26388121691	3.08827004421	3.56267120109	3.30143668521	3.23084369759
857263	3.88723538113	3.78575503705	3.62177942861	3.93528913116	3.73181537772	3.68718630698
151728	4.20165033329	3.91792126789	3.77441597064	4.02062570098	3.73066192315	3.82860724798
583858	3.69716495148	3.69212932039	3.01174764918	3.60628225411	3.51896795993	3.13989671008
784565	4.40971683641	4.16909648829	3.96286615874	4.23116462087	3.95478755459	3.71040596951
566454	3.92247167855	3.64994890676	3.27642654311	3.79656205459	3.68237998193	3.50538779761
164030	3.88918238059	3.58158740644	3.4959464593	3.73019314327	3.38960711107	3.32518425192
522434	4.49415883097	4.02031330602	4.04952765825	4.41776832798	4.07068460565	4.00043070308
150726	3.65002474196	3.47130311667	3.29528937541	3.27126713568	3.22800158029	3.31456411359
198855	3.8922337606	3.5835308876	3.49542198451	3.74301530329	3.45479336155	3.49516831286
937160	3.93641132048	3.52275807357	3.41812483075	4.29310721921	3.97664376812	3.86940833973
497865	3.47818686895	3.13300851766	3.01730685509	3.24164174063	3.21433567115	3.19695603941
386250	3.55477880055	3.44101835524	3.13986835536	3.62213112387	3.39775543421	3.43237744331
530635	3.76877249814	3.38887943185	3.37176083614	3.69757248808	3.40808648418	3.38576648739
565452	3.89995239023	3.8013828969	3.3974210173	3.84009017149	3.51331189112	3.46507635903
214221	4.17839027702	3.68785884054	3.40125610684	3.79022904014	3.70444517176	3.63715497826
180432	4.06138485874	4.1509027205	3.87505484495	4.19938973885	3.99960201415	3.84096406543
154835	4.41872982165	3.90711993013	3.65053579956	4.24457508182	3.76080893708	3.79776916864
885975	4.09639993378	3.78022944442	3.83507808824	4.27968993985	3.89923709242	3.6212988295
316633	3.98570128279	4.12385024393	3.55266662255	3.8736869161	3.61542969426	3.11786600951
782561	3.72964263055	3.68107826568	3.44573489863	3.53288958254	3.36299919992	3.27563655897
623844	3.71604166134	3.48491253485	3.07815947462	3.46172601246	3.17321121385	3.09429696614
547046	4.44962460748	4.46519307408	4.2294252376	4.37098172687	4.1643398704	3.89166934735
922854	3.60808953785	3.55009624978	3.15790033839	3.68216432762	3.55688265748	3.50393735812
162026	4.32420035719	4.15031424245	3.89936373112	4.20128792001	4.20063716362	4.35042823952
594156	3.8867118786	3.83145090078	3.12830077536	3.76734032656	3.54952472975	3.6269876286
123117	4.19192236381	3.76339217546	3.58661920917	3.83776698924	3.62420149939	3.94104275593
149741	3.69360034634	3.38038681492	3.46629813219	3.68182538187	3.35859520909	3.47885429186
204016	3.98325273692	3.81191571884	3.71044675262	4.07646974761	3.74428822451	3.92166976721
172029	3.66334535471	3.51398969789	3.24519994348	3.69591538238	3.36591679246	3.47001055768
541943	3.69600994863	3.76765070257	3.92856273126	3.87247956901	3.63954453637	3.39679228084
683256	3.85584084005	3.64480962346	3.81991576215	4.1326063566	4.18936905921	4.1034968154
212217	4.42929949321	4.1668636618	3.70787978542	4.34928076364	4.00318564057	3.69709174948
152831	3.16596800436	2.92220937045	3.14159026178	3.31286005187	3.32346680883	3.39580882196
113922	4.00402454702	3.74053808736	3.43415488352	3.76937996312	3.35499591257	3.41077659426
195849	3.96675913453	3.66735171972	3.51034220631	3.76014770839	3.27004797156	3.58457867416
130316	4.17350959013	3.94633788859	3.47562724871	3.91435585073	3.73806601752	3.54292336177
562446	3.96799741892	3.80332855091	3.33212446182	3.97590344907	3.54827445231	3.50361129833
211215	3.73734935441	3.5200700448	3.37763029892	3.65651049092	3.31275802258	3.51895823967
861456	4.38980289663	4.19508164521	3.50688218012	4.21222721521	4.15859339674	3.37966875142
173334	4.03903916041	3.87819786676	3.48708905475	3.69044802643	3.47414955765	3.31400571768
199958	3.8090829368	3.54876397386	3.30840552261	3.66321937588	3.3832868798	3.34565004206
147737	4.25279458995	4.29296244304	3.7673644498	3.89301999011	3.76772631132	3.90362848774
771354	3.60588605599	3.54057983695	3.35928331664	3.64778447348	3.3897430946	3.45084248127
108828	3.59730490778	3.50705661665	3.46741943134	3.70873453805	3.55471186193	3.62092543569
194847	4.46407528514	4.35410910217	3.86164881649	4.37034098686	4.1114953631	4.15457606298
164131	3.69139553838	3.34182728529	3.05022393204	3.91603923029	3.61192473131	3.63466643467
138534	3.51242777916	3.21948779934	3.05939275837	3.39118015397	3.14754776501	3.08965449292
172332	4.09131861765	3.79787691147	3.66051087665	4.11076099148	3.88266324312	3.8810744966
120111	3.97441501799	3.91751278475	3.40145341522	3.69788233323	3.67772193088	3.49956795176
770352	3.82267161525	3.97763439607	3.67090548223	3.73106694241	3.54106738354	3.22654801608
154936	3.59314365036	3.41201385856	3.25251620064	3.46333380283	3.22076670699	3.47334196911
163129	3.9917795865	3.58811440448	3.29107307209	3.67131207845	3.55873521366	3.58109538892
124220	4.20543249053	3.67994459688	3.5430156995	4.13611987551	3.71139468931	3.72478467246
205119	3.66644233725	3.38165969417	3.36767675994	3.72329981619	3.51356982301	3.64120183483
901442	4.14442838332	3.77394937717	3.53721163538	3.93781679013	3.6218061435	3.52357623774
239944	4.31004303015	3.99632639056	3.62995758809	3.83072715946	3.71507541558	3.57015605502
192843	3.58577876471	3.25361536218	3.0860091088	3.66291612767	3.41481926346	3.39184203441
837964	3.8815912709	3.75954054223	3.68234416741	4.17056530639	3.80462543751	3.93907679967
175439	4.09842581882	3.78343631582	3.38850467159	3.70034698349	3.48135935024	3.31677445902
871762	3.83902136558	3.49257127126	3.01289285848	3.50173997624	3.24073718387	3.08106161488
158035	3.58388923266	3.64702644865	3.49852232856	3.50004656517	3.21191050438	3.01653301306
217429	3.98184162113	3.85465498979	3.7517327163	4.08036260844	3.8934580606	3.86232434556
756055	3.44279132896	3.31834060595	3.17576973169	3.27207426516	3.11625889696	3.17815616001
290136	3.5711516609	3.82433398028	3.43865270226	3.78908357052	3.62871646488	3.44959075371
310621	4.37943043832	4.13357970229	3.65452904984	4.06970661551	3.89729028249	3.69573795781
212318	3.88121406891	3.64578046891	3.31948084134	3.84594294829	3.67040849421	3.57828028652
191841	3.91422568866	3.66107109939	3.44181209992	3.90013060458	3.68224584466	3.59900295669
208226	3.78136439816	3.82465510061	3.65302145986	3.93224424358	3.65971644766	3.83228028961
486759	3.5712120117	3.38106857046	3.16017799915	3.48555040396	3.21902730385	3.23488013881
135528	4.06913877641	3.96698113727	2.84640349858	3.91183840179	3.6487557231	3.39181947595
148840	4.01176846631	3.82909634782	3.54395700332	3.95596975671	3.76581247032	3.58111277615
104820	3.28749102615	3.22348411246	2.93059329949	3.58629223924	3.49596856786	3.12320707644
139637	3.79274231427	3.70718719834	3.61336910534	3.97379867352	3.70379336964	3.81996300099
211316	3.51946999826	3.54320043932	3.05132629542	3.37142123065	3.18113285336	3.21759106358
246133	4.08904312583	4.0904049796	3.31054962417	3.96680502017	3.6481350669	3.77104478738
510326	4.65767813631	4.74298834476	4.42865286207	4.42766103387	4.18587005529	3.84528540142
126325	4.02129673273	3.78011760008	3.33777839321	4.0644550032	3.86547035632	3.64561005856
160123	3.80142189274	3.80768180386	3.28859896024	3.64680114655	3.45130867645	3.57644448552
173435	4.12043456241	4.22366306553	4.0358740864	4.10270312673	4.09146418997	3.76750551821
485757	4.15467736755	4.03265418027	3.32910594336	3.60187441259	3.34195688546	3.39115357448
169343	4.04243043894	3.55936485323	3.68835575035	3.96700274654	3.85159020058	3.8432382109
117122	4.19204402127	4.10594306952	3.79018930254	4.20581115207	3.88483759425	3.70956198481
907656	4.06685422154	4.01510561232	3.43904834444	3.72928954122	3.49774469958	3.48858026948
103818	4.56375999777	4.19594431671	3.95969243649	4.25411041315	4.08048730781	3.87549709319
788876	3.92203132003	3.59482664815	3.45137518178	3.81178374594	3.61237097396	3.42479912639
120212	4.48662967831	4.12614195699	3.96390405322	4.59616272403	4.20694686544	4.38301565372
168341	3.95570281326	3.83105224976	3.74696611349	3.95974557352	3.76541337145	3.89638832552
201111	3.55907627065	3.2928265596	3.23823263949	3.37205921097	3.11500390899	3.06262793848
214423	3.58065887854	3.11648731404	3.14327117979	3.57557234769	3.2856286077	3.16426712802
984472	4.08242819787	3.75028309371	4.00221049686	3.91140724624	3.83157491232	3.8378850475
176542	3.78683331966	3.65667655305	3.13947958506	3.77331705539	3.56548753472	3.54296324974
102816	3.99337608148	4.04346924068	3.58331103698	3.70555937895	3.41397044394	3.05517195802
137633	4.0276983931	3.94446268837	3.45048701011	3.75915243795	3.42616969391	3.49784745858
159138	3.60737971377	3.25477258899	3.03027219851	3.89114782934	3.8323515289	3.50380103226
205220	3.96211853386	3.72838919465	3.26902365624	3.74653052332	3.41460414534	3.33381222326
145834	3.99787673916	3.77572759343	3.72983293779	4.25878420462	3.947019775	3.97363910171
385450	3.7252800159	3.51993069129	3.38198976861	3.48097127231	3.3344866635	3.35259818099
200109	4.47898572432	4.25251410188	3.83435239176	4.17440537606	3.7392207578	3.44213049476
599469	3.73083082764	3.84530943112	3.8425831512	4.39764199193	4.12545175135	4.04296138679
645551	3.71738247963	3.50585102606	3.3368227838	3.62867657435	3.39420945894	3.52005380065
162228	3.57118164568	3.33684446938	3.35762568623	3.54122395715	3.43348388689	3.66661391118
158136	3.91086121222	3.52943093378	3.15258361517	3.3595332116	3.28712618498	3.48186867594
397760	4.03058320314	3.66784996302	3.52381832493	3.85636880807	3.50283229316	3.64994420652
144832	3.22883666971	2.98433967597	2.62310993686	3.16360121254	2.87401812329	2.80813154806
153025	4.14944530657	4.10921853607	3.71855483788	3.87118612668	3.78916145775	3.4961087512
212419	4.11043446566	3.79217035474	3.6015706984	3.84006811179	3.63083033682	3.56817621
208327	3.77588943403	3.46722491643	3.22559592229	3.55187026298	3.17096640142	3.23188858216
187850	3.95617509616	3.54096548017	3.23734910235	3.75611720281	3.55987364082	3.77532802259
580044	4.0288094007	3.99726464835	3.82257554926	3.96302546011	3.74879606077	3.66912940612
122317	3.83195016826	3.88359969748	3.468835642	3.924523658	3.70782639171	3.67467285859
148941	4.32953081833	4.01393983352	3.69767224379	3.81857616349	3.57549711662	3.69203100834
182739	4.44104561711	4.18470606475	4.09214080542	4.46507283579	4.11097352804	4.15131629445
729557	4.67470311795	4.37213048519	3.70774333125	4.35964758085	3.89031706308	3.928126371
361941	3.63622439572	3.39482870671	3.2541846073	3.76521637077	3.77379663871	3.81663782392
298455	3.51791221605	3.14397447344	2.96111791631	3.6794999637	3.41787092613	3.46999535991
695768	3.85198301005	4.03991164297	3.68951007526	3.77765244416	3.58435032862	3.46928790414
211417	3.94578785508	3.82521668023	3.68680631033	3.87431456086	3.63537622215	3.64404783156
366042	3.75177870682	3.61223702328	3.32758901025	3.58986673838	3.41570210994	3.36826826463
173536	4.08305576366	3.99594695261	3.73617325673	3.77425745566	3.33380640054	3.43007594028
195041	4.05745288374	3.90752830856	3.70827014207	4.18842576543	3.90486086032	3.69584509164
169444	4.26628150622	4.15966507184	4.16282301442	4.15537841651	4.02882611636	3.6932652645
177645	4.17775401235	4.03978815521	3.73236663284	4.0819489998	4.08013480141	3.96733744203
199150	3.86872922338	3.60203637579	3.5559304886	4.17947864616	3.94389510365	3.66178934718
210415	4.3412033956	4.08428780907	3.54827527898	4.03780245709	3.6525153116	3.37285391727
390645	3.48957458954	3.30272060436	3.050272632	3.40573038044	3.34885213596	3.09350077428
172534	4.57854173265	4.34648842286	4.16124467454	4.43430283585	4.16455856123	3.9545092124
231928	4.04665712832	4.1523270251	3.62883461835	3.83441361831	3.56057750982	3.52532331709
133625	3.84303802669	3.51623985933	3.36296629157	3.72090107899	3.65932812837	3.63057443212
500222	4.12903758675	3.93324714194	3.74327474738	3.8883529196	3.5823941901	3.43854635823
958976	3.74156308433	3.59749781705	3.26324829442	3.62438598338	3.44374180499	3.17866855676
141826	4.20176270514	3.93900393839	3.66117028592	4.06382056758	3.88913511094	3.77906596597
163331	3.54371282347	3.53011166452	3.44862276988	3.69357591396	3.15830123733	3.47417238331
124422	4.49867999075	4.19131235955	4.12151854112	4.49207288564	4.09551471433	3.97559615082
159239	4.50788641584	4.41908464473	4.04106651891	3.91368806559	3.81416456092	3.75858891024
303624	3.52850672764	3.36139283912	3.10865327527	4.17943445754	3.76856040698	3.28132737207
992774	4.0682012898	3.99951878627	3.95622491249	3.97585444025	3.74722581668	3.72134195935
816653	4.10904803092	3.77450015625	3.44672573339	4.03706943586	3.89586711272	3.87356289646
479762	3.58973546404	3.40681706816	3.34190057366	3.61755962644	3.4856017326	3.61281115257
414229	3.6244786869	3.52785043105	3.18111157495	3.52479538468	3.30950824219	3.35979242684
957974	4.14514725348	3.98692199046	3.82045784947	3.9694818197	3.75335219956	3.74725976373
713239	3.90759362087	3.78756749749	3.21077673159	3.91485107942	3.80235418407	3.39527264834
859671	3.93546774785	3.79787851394	3.49883502818	4.00243329641	3.48855804897	3.36676800237
162329	4.06131041525	4.26264252302	3.7818938918	4.18588345132	3.98948625875	3.80146725969
140824	3.53615855883	3.38919245523	3.39051493435	3.83589075984	3.93289453425	3.9347497613
101915	4.35607950974	4.04632027691	3.7049308553	4.07992449944	3.70178528874	3.91326509069
123420	3.61383095749	3.206905884	3.28712741818	3.96204105674	3.86047339686	3.97738759555
256540	3.94677810564	3.79701146355	3.16663286857	3.72413098711	3.48544482429	3.27819459673
871964	3.5405357262	3.19718104486	3.30692934231	3.5257227396	3.40984340895	3.58029957972
106016	3.72315709414	3.58298896779	3.35705250017	3.57935653613	3.26619955336	3.15698854963
397861	3.37888634111	3.37766068704	3.34647926836	3.59965157028	3.56492514763	3.82737965495
166438	3.66664972499	3.4284697412	3.22491928732	3.62896711374	3.32312030294	3.07240357051
598568	4.00974619051	3.88313355995	3.77628431389	4.31785086525	3.90636451762	3.81959781163
161327	3.62306588198	3.25694520716	3.12226687863	3.48253388605	3.06705262537	3.13251122358
196144	4.52372323256	4.4352490127	3.92179357434	4.32249718364	4.08221092394	3.98896334331
182840	3.66111556775	3.29742798986	3.41375081555	4.01827597862	3.80989446738	3.68243782959
191033	4.16255567296	3.70210865781	3.64459053063	3.82505581893	3.61298634847	3.69956268817
250427	4.09919968062	3.92911868742	3.69615623558	4.23677350001	3.89876770677	3.71077430108
113215	4.00950459032	3.73194584646	3.24756065221	3.6672367448	3.41209603541	3.56601362142
148032	3.74469260333	3.67466455719	3.29080407654	3.66187708464	3.54412638356	3.38875560714
545345	3.82734450877	3.459679135	3.4125965225	3.65333792827	3.30097584387	3.3610593835
109123	3.38994523392	3.63038079874	3.76617056035	3.8948186877	3.9433386866	3.85938868944
156233	3.41367708322	3.21281271385	3.05122576803	3.62442251028	3.40110971585	3.34365549131
117324	3.76360216396	3.62628028117	3.43899424072	3.73633723948	3.32032890317	3.18553810084
887373	4.04965602267	3.72354682834	3.60531973543	3.91471278648	3.55739457668	3.58690467844
190031	4.18700591103	4.27313453735	3.89052288202	4.02592470679	3.68004933075	3.66772530922
177746	4.16029287428	4.2797750371	3.78390441266	4.0670455222	3.90281199031	3.87688689251
441939	4.30249705238	3.95540324471	3.7018289051	3.88053267424	3.65495353558	3.79693251075
147030	3.45499396771	3.46489297837	3.09833270022	3.46331766454	3.22050809604	2.95328495643
194140	4.16791706643	3.77857459666	3.50431314456	4.26840155783	4.05630300879	4.01170119309
155231	4.1395974353	4.02877676652	3.72028205785	3.80488254843	3.47880621647	3.4690476816
180836	4.58024027821	4.41475455224	3.52296726933	4.15201743275	3.95947405762	3.63722145685
377451	4.57698904266	4.33606567003	3.92175643642	4.40160400081	4.08128668259	3.85728365108
159340	3.52861061462	3.3190183496	3.16904225208	3.38435160579	3.17512929033	3.51341520992
436845	4.1800102204	3.90784526296	3.52497963693	4.56359436754	4.51246048571	3.79647928973
877168	4.23619266542	3.91973344816	3.89110490628	4.50489317215	4.43714935712	4.0740636115
171633	4.09812951505	3.75151354983	3.6395491075	4.10630133498	3.79147984747	3.74314687748
599671	3.77520473029	3.28871846596	3.21387587529	3.65929134588	3.13927306871	3.31018700314
115320	4.24516243286	3.84115461046	3.99408202706	4.19263871529	3.99206474929	4.0333620613
833148	3.78645153214	3.52469957559	3.28341133965	3.55155444453	3.36421084836	3.32074812321
140925	3.78920157821	3.37866852479	3.08820982077	3.63605842065	3.24888566134	3.07256311642
136833	3.69173929913	3.50919669718	3.35287865567	3.9658870784	3.66905304941	3.60247576194
568963	4.0254992508	3.94596708866	3.66150612731	3.91273319432	3.65975330226	3.68778200189
131722	3.62463078499	3.43716380247	3.1799038017	3.82157736474	3.68257633262	3.61002769273
127630	3.80618182949	3.67233976457	3.40125844059	3.61792912415	3.2220676052	3.14940717057
679568	3.27252087141	3.20877800508	3.02154638746	3.28856344261	3.12142831048	3.2225351296
930449	4.10919984092	4.05163996125	3.76297719124	3.93677969771	3.60817495358	3.69258090437
845458	4.02909856896	3.8774596081	3.32525815409	3.76920159709	3.57292626088	3.19034495356
978578	3.87164996177	3.77389037743	3.70588905174	3.96774155336	3.80482961292	4.16329773058
255639	3.64106064807	3.35531366263	2.71791562933	4.03724137754	3.59187546853	3.22993448987
157336	4.462297359	4.42219587105	4.1415211915	4.47597324448	4.16561642848	4.10023772205
567961	4.30019116303	4.02158874763	3.28988605138	4.02596929577	3.80041876859	3.62857044806
203418	3.91430875918	3.57849932576	3.17983374361	3.67906919466	3.46613375073	3.62384193219
105115	3.62828058521	3.57576252346	3.53218638011	4.13703650937	3.78729207524	3.82060428893
622236	3.73554282397	3.55296022497	3.3101506406	3.56364976796	3.40093831169	3.3866079015
178849	3.64025001477	3.31062756107	3.12845757632	3.73557582703	3.63905458986	3.70982769749
285345	3.9757586331	3.48532838718	3.26148184584	3.92948475694	3.54919590371	3.45611792025
665254	4.42757976207	4.19424805268	3.77642762476	4.45203973493	3.96188144461	3.80648592824
433839	3.58916315896	3.47733122644	3.5523178712	3.86793856297	3.61882303799	3.50837873335
673455	4.28555378383	4.35606288537	3.80621874565	4.33886200759	3.97428587961	4.13308144448
702133	4.03552429637	3.80002923455	3.29607762665	3.75058200632	3.457755895	3.48140073049
395958	3.91618359872	3.5367831332	3.14618986735	3.80433716088	3.45978861296	3.03920811187
151223	3.53474353308	3.17296399669	3.06224373124	3.53617191845	3.22256998123	3.02827278343
210617	4.41612226733	3.84551036708	3.60873660875	4.02616539686	3.74880912792	3.58883605
856766	4.37586075425	3.90442160475	3.79403382041	4.06681914587	3.74117489598	3.79297308753
351938	4.11706258633	4.09514487212	3.73549548964	4.00975934342	4.00234303005	3.80910587906
133827	3.49734123791	3.19481066361	3.23708899879	3.61260490405	3.39568992661	3.42575487648
120515	4.34869406903	4.2420696729	4.02670362908	3.99410384776	3.88554473237	3.91969932493
201414	3.79320210984	3.49410411203	3.04569175657	3.66262037213	3.38309452342	3.56337056905
103111	4.05881390262	3.68227344436	3.73324873934	4.14357906972	3.6337378517	3.72310782067
214726	3.87322779127	3.54803730735	3.25026539423	3.87060011581	3.71230774742	3.84204221241
180937	3.881986653	3.44448240753	3.31656513393	3.56794566542	3.41066736023	3.42708590817
932554	3.92003932316	3.79411412814	3.45733786048	3.85501506047	3.59990945446	3.49833504495
198350	3.92380595507	3.86332462913	3.52564046385	3.92665435597	3.88648115631	3.52373205072
111312	4.14103298571	4.05091217585	3.62413877081	3.90718836794	3.72722954015	3.45078067969
159441	4.02621541801	3.61510295181	3.71827800524	3.82198720796	3.57867267517	3.69797536746
894673	3.98898146985	3.77186032699	3.48134147113	4.060437696	3.77832497841	3.80978416785
877269	4.03859197187	4.08073212505	3.63171453252	3.83898000574	3.52068440466	3.26599050881
586460	3.84867798768	3.946837628	3.71520064757	3.94734572541	3.79093592005	3.67714226672
983773	3.81691477101	3.3727818039	3.05556210581	3.80619969171	3.42747318192	3.43885029554
872158	4.03562814581	3.57519207117	3.71100634949	4.04139268525	3.80031509747	3.96255027248
833249	3.57254402318	3.49511640947	3.25983203242	3.50556458529	3.35716443676	3.59496064526
748258	3.8345882709	3.75863934449	3.46848503231	4.1184327029	3.93951180626	3.67960203337
197348	4.00302303592	3.83771001357	3.57110703803	3.80030403766	3.56259627686	3.40620959232
581349	4.15408786625	4.08994539597	3.62543512364	4.14488443529	4.06042508237	3.94110200522
422632	4.17109041938	3.69268649164	3.75349244223	3.73289982423	3.87387216147	4.11438336654
204521	4.21862341964	4.16674407681	3.59313593003	4.01456701878	3.70576669269	3.82491579285
889579	3.66776729544	3.28276725154	3.6306739904	3.94191835202	3.72587466532	3.92486634438
704238	3.9112644123	3.73818339086	3.38038807836	3.62763014895	3.43319584521	3.75811834543
114419	4.08522987727	3.71124133739	3.64484915117	4.29650570948	3.77975223648	3.94788643745
751348	3.61926780266	3.48160414461	3.15796217201	3.61621798936	3.50377472053	3.50420500203
965367	3.84284354174	3.32991302634	3.0622897089	3.36279513638	3.13175046359	3.35533381717
183034	3.76371426925	3.64433773557	3.19788766334	3.7715552514	3.54887449105	3.24623983975
580347	4.0449247017	3.7135600738	3.55277731333	4.00546802082	3.69830742193	3.6679454519
135932	4.18456518707	3.90346005069	3.52829084031	3.99808274336	3.6702287345	3.35341043403
122620	4.17047802328	4.16549506912	3.71254537477	4.05420600729	3.85392664567	3.84788408175
157437	4.37226582893	4.53595193015	4.09754629151	4.26584433365	4.15953496335	4.16513649737
105216	3.84735808348	3.60972737526	3.36385566247	3.76613331921	3.66324099088	3.59202357454
118528	3.42231601815	3.24199679014	3.05450844322	3.32754921204	3.06629749089	2.99147188802
285446	3.74214684751	3.73610253294	3.44763248819	3.75665416183	3.33426449467	3.26076800302
917255	3.87345235904	3.80706231861	3.61584811586	3.9287449186	3.76240113859	3.75772801752
211720	3.60674031981	3.65115832911	3.44057954877	3.49180538248	3.51247864512	3.55743213572
896778	4.10309649325	3.80161817029	3.62599752696	3.461478592	3.56345936645	3.38562209802
567052	4.08236245535	3.74727031991	3.71553072323	3.89670795781	3.77625407364	3.80004323225
519950	3.94380038549	3.90222363588	3.46537983246	3.60744039707	3.45693037048	3.20492886538
289555	3.94045150396	3.90459658508	3.55162030807	3.77945388031	3.51855791059	3.56600739193
540436	3.80495388424	3.97944247307	3.11562638574	3.48563955284	3.30023163316	3.42778500954
224022	4.04323418622	3.7949374419	3.4281650568	3.53902538401	3.38853199685	3.52873539638
199453	3.65369263456	3.64861378327	3.56815015172	3.92704481609	3.83549485476	3.66966346854
186141	3.77000961587	3.48861012601	3.10621325564	3.39705770409	3.21885425151	3.08213284454
365343	3.84447371804	3.52185320995	3.39107859041	3.66808130913	3.6666992983	3.75576969939
108323	3.52683648243	3.43073298789	3.06007147026	3.37133228826	3.09349215139	3.04381310833
133928	4.0010546652	3.61944103383	3.40372830929	3.77968033516	3.30668230628	3.29645128248
334635	3.46091620174	3.4149228891	3.1032071583	3.31039723953	3.09509782579	3.11717673386
116524	4.17542544441	3.93504638214	3.57844000918	3.97048420684	3.60066300699	3.66037068687
899885	4.10801301162	3.88046399274	3.68046604223	4.16990343474	3.90664724468	4.04591971261
185139	3.9889724463	3.65922151905	3.47838053939	4.16960781341	3.70599350371	3.80182601073
198451	3.64353979013	3.44953400041	3.2481505106	3.55727826099	3.24962958678	3.28341561239
111413	3.92154934064	3.72951395394	3.25489428213	4.02253687134	3.93142867156	4.05021136546
107321	3.68362614955	3.71440746014	3.32162308105	3.63904573014	3.36838115897	3.20163897526
705341	3.61182316653	3.45350353311	3.42953111473	3.42080840379	3.1324221274	3.52777929695
154431	4.22578118863	4.0253266921	3.83395816839	4.09909568243	3.97185535074	4.16390444522
110411	4.22335693463	3.71485234505	3.82460003545	4.20243868669	3.89886180138	3.95454097874
158540	3.90034554516	3.77024160697	3.47006953021	3.74859197721	3.69883666915	3.77472224454
987983	3.64503413209	3.70344691974	3.32102302502	3.61834603852	3.3942793951	3.30639149412
106319	3.93736833902	3.57836648335	3.43856897753	3.72519824844	3.36779621556	3.30467414846
131924	3.82526254255	3.46893713587	3.36113458427	3.57761924706	3.4965258788	3.76642810156
140117	3.52248788865	3.53942971462	3.28182119375	3.87249167366	3.75653135945	3.72266038829
153429	4.27152428908	3.95800042462	3.72084765037	3.87354588948	3.63377699398	3.66597502863
149337	3.60480450611	3.37571449359	3.08104582278	3.62750976847	3.42211046502	3.34607868908
448347	3.63559988729	3.36688853018	3.36391306892	3.48761316885	3.24562708941	3.38333871912
627549	3.73730282262	3.56898265287	3.35820888238	3.743321081	3.59480676387	3.45945834015
161630	3.92985752281	3.83266139071	3.63582544449	3.87164267758	3.7352598667	3.61145513907
473952	3.90246434197	3.77504016904	3.63845137637	3.83967578728	3.71861510569	3.75752585249
144226	4.20324863712	3.97394543705	3.53164733351	4.13654296216	3.83459060438	3.66151297597
397154	4.10798705502	3.96202116714	3.67414706051	4.06871563788	3.82064333761	3.51473331293
191336	4.03251022207	3.82732588334	3.59464194413	3.92905196046	3.64365672413	3.60968609217
904044	4.38714002739	4.36828618552	3.90832399492	4.23597057371	4.12371882968	4.10676566325
233326	4.1541931694	3.72696866561	3.61958039945	4.14394835889	3.72470848882	3.87604834022
148335	3.55577417688	3.43975662118	3.26271020185	4.01427448746	3.67828931938	3.87581547932
412528	4.40034037331	4.15746281159	3.88540105492	4.23091960701	3.81342329248	3.72598917107
366446	3.60555026031	3.46124587202	3.31426530338	3.71045671288	3.32978581154	3.2955271704
499566	4.34204320962	4.01583098287	3.68240847655	4.25235484199	3.68909601823	3.63234035885
896879	4.00253920361	3.77988388141	3.43123540338	3.8070021173	3.59199498077	3.41526249092
293748	4.001059449	3.94764348923	3.44025531671	3.6765723461	3.33240381167	3.25325395618
173940	3.94669168833	3.82479007721	3.7543395909	3.91675203378	3.8351038398	3.64437463375
789373	3.87959045376	3.51442202479	3.53483195735	3.70756749087	3.72764003807	3.80949966327
715647	3.69109397807	3.492242087	3.47082346514	3.82499441813	3.72231850084	3.79558956386
570243	4.32715534245	4.30557740461	4.02374416683	4.00133496748	3.77543879176	3.76797262696
352132	3.94869509474	3.65595102599	3.59782276672	3.64390403801	3.47443402959	3.6034287045
339847	4.15067721088	4.23035908557	3.88457496424	4.3041034479	3.9837820177	4.29602404668
172938	4.07902596184	3.73394686746	3.59603108412	3.83756288176	3.5177853353	3.73391351424
181131	3.92864650069	3.65342308458	3.55766109965	3.93770275237	3.712281636	3.56902516317
480141	3.95481801457	3.7910399527	3.42911128485	3.74911322187	3.46528362088	3.17218176229
304020	3.61203770485	3.25830973011	3.28204470726	3.46657375283	3.17826720567	3.24142868604
124826	4.13308265308	3.88423512201	3.36899391024	3.77498834929	3.40462485879	3.24899740043
146331	3.78956341319	3.50872376083	3.25929390365	3.6797614874	3.6259172698	3.22421731682
133019	4.09374023196	4.07217285318	4.04805616693	4.02765436596	3.59093188661	3.65189827235
205725	3.77462055041	3.66254295116	3.55188982762	3.69728118979	3.60850030559	3.68170711247
107422	3.58955092389	3.52556962663	3.63511795678	4.17821895619	4.1340367839	3.90137939343
910241	3.69101083792	3.54340595594	3.43421272986	3.57527518643	3.44668759921	3.47533076577
180129	3.87581393884	3.68427231969	3.34589864273	3.5844797112	3.19089826461	3.25054964058
189349	3.92654601914	3.77874362581	3.57741638132	3.99289848887	3.59387642158	3.64630898763
200614	4.13881981408	4.1717797129	3.67920844168	4.25292752978	4.24861144444	4.00412666724
102311	3.9729406779	3.72320529827	3.37606254604	3.82562736458	3.40096245803	3.2444601205
162733	3.56120574102	3.38533910435	3.10788539234	3.75668019514	3.44715123364	3.50060572363
709551	3.65167179978	3.47036529529	3.29952625556	3.49364725085	3.40195396772	3.48499392138
170934	3.79158292812	3.54162068633	3.48936426074	3.89525651661	3.36733892537	3.38487270877
307127	4.14036156969	3.62673762917	3.72238380637	3.99446362154	3.57907183037	3.83343528379
837560	3.85217018007	3.60595912744	3.39930462821	3.75203876504	3.35965340601	3.26651950258
251833	4.04641116393	3.99292708048	3.50930541085	3.83221701661	3.5790277435	3.5868124944
175035	3.35554891874	3.16749696123	2.92044704109	3.43450353891	3.01464321692	3.13508656121
465852	4.07209215814	3.82574627781	3.52044264391	3.89427775373	3.46747047929	3.1786920555
127933	3.7113802318	3.59614269265	3.54485716715	3.44299673722	3.26800031199	3.49278458326
188347	4.62117542958	4.22941776371	4.11129483585	4.33302946427	3.80494544284	3.9413353054
161731	4.02337770761	3.85143327368	3.35039384876	4.03981394082	3.6819066503	3.61489303135
118730	3.96112330751	3.6456072175	3.353650674	3.76112247731	3.52502803549	3.59930100416
191437	4.24386431275	4.13953147754	3.82482581139	4.26215922069	3.85474464026	3.78559998963
165840	4.06523208533	3.89648202956	3.56137002618	3.5646716961	3.34288714811	3.51874442397
211922	3.97310714934	3.66897588733	3.61725660848	4.19986595932	3.81015767105	3.83936748157
156637	3.77836341246	3.47893061384	3.10492547114	3.70441445085	3.53329353801	3.34186578359
143325	4.25841703812	4.0883591514	3.66529922853	4.10530495018	3.8830831141	3.8913712264
178142	4.12101883782	3.6896878202	3.429092011	4.30101662457	3.9401648411	3.8876086239
994273	3.69458425942	3.6417715713	3.57695785122	3.99564237021	3.84378945686	3.7747843054
139233	3.72075617475	3.61595788466	3.40854242828	3.55945364388	3.32712493444	3.46636407343
151526	3.68013863731	3.33888639761	3.41025670157	3.90441619051	3.78761943324	3.91586579866
199655	4.09432832675	3.96854216138	3.73492636066	3.93604167328	3.57657038403	3.73280651925
284646	3.23931462799	3.17878507064	3.06388257935	3.36951261664	3.32834623683	3.23040458389
690152	3.94889975935	3.75942432478	3.65200854797	3.80873035571	3.53010067579	3.41574209041
108525	3.43647271397	3.16931160066	2.75795904676	3.50203165306	3.36015567432	3.17843073217
181232	3.95982329567	3.58508109292	3.48996872681	4.01903978425	3.48435980928	3.23468018102
826353	4.52174077296	4.32656972399	4.25657971988	4.53089917594	4.30998488177	4.30170390681
155635	4.29259091002	4.01405892515	3.532884279	3.83563159486	3.50782518576	3.20496141407
672756	3.95134768551	3.72691396678	3.59910434732	3.71419669915	3.72582830573	3.63135742452
792564	4.22092958831	4.06326741556	3.86417627663	4.35201121372	4.07349223021	4.31759943773
103414	4.09518005962	3.90714416833	3.49523434942	3.99406758731	3.77904557351	3.63038098764
138231	4.03673636992	3.80016933369	3.61470765605	3.87225986741	3.6562396926	3.73062231169
163836	3.37788228197	3.46257676519	3.22045962234	3.71758581282	3.56075043084	3.53807582323
680957	3.93899469947	3.71732848404	3.31239540874	3.76514689023	3.73053554665	3.0957928489
