# Supplementary material for: Microstructural organization of human insula is linked to its macrofunctional circuitry and predicts cognitive control
Source: eLife. 2020 Jun 4;9:e53470. doi: 10.7554/eLife.53470 (PMC7308087; doi:10.7554/eLife.53470)
Supplement: Figure 6—source data 1. [file elife-53470-fig6-data1.csv]

Insula	subjId	rPI						rdAI						rvAI						lPI						ldAI						lvAI
ACC		rPI	rdAI	rvAI	lPI	ldAI	lvAI	rPI	rdAI	rvAI	lPI	ldAI	lvAI	rPI	rdAI	rvAI	lPI	ldAI	lvAI	rPI	rdAI	rvAI	lPI	ldAI	lvAI	rPI	rdAI	rvAI	lPI	ldAI	lvAI	rPI	rdAI	rvAI	lPI	ldAI	lvAI
	100307	0.019504303	0.019873476	-0.033886563	0.020241862	0.011511139	-0.037142634	0.011297904	0.035191912	0.003864706	0.010448589	0.030336495	0.002569814	0.012484294	0.011583452	0.026057661	0.011169534	0.012103446	0.028854372	0.012710397	0.017751193	-0.031255458	0.012684388	0.011710055	-0.036486957	0.01235077	0.043989968	-0.000835534	0.010726003	0.038875263	-0.004600293	0.003114648	0.019814735	0.042742521	0.002170957	0.022635218	0.045946941
	100408	0.033526842	0.015847638	0.006365989	0.034663152	0.017246641	0.001346364	0.012684773	0.026996631	0.020771455	0.012550741	0.024895076	0.020197958	0.016903717	0.006981417	0.007480301	0.019105382	0.00868277	0.004437546	0.03783264	0.021295495	0.007312973	0.040083632	0.02087838	0.003196871	0.031474244	0.017726293	0.005721395	0.033441078	0.018710213	0.001197746	0.01916891	0.017035937	0.017345907	0.020800803	0.014596505	0.02078264
	101006	0.029753793	0.02420589	0.001152906	0.02964012	0.022406297	-0.000272977	0.022057895	0.029853152	0.003554661	0.02088692	0.026803149	0.002865336	0.02818495	0.03338306	0.016467037	0.02826987	0.032149531	0.015722232	0.036596518	0.03877119	0.00038111	0.035790749	0.034576226	-0.002020237	0.035755366	0.041505523	0.008281505	0.034656778	0.037808191	0.006379052	0.022214582	0.0183226	0.016270256	0.023528373	0.020151049	0.014927359
	101309	0.035910439	0.026151719	0.006754852	0.042168245	0.022673428	0.006095463	0.028043061	0.035656791	0.016798152	0.03192215	0.031506058	0.015369148	0.0086625	0.018218732	0.02731348	0.008945361	0.016484039	0.029584162	0.049843099	0.037169244	0.004818224	0.052242771	0.030680779	0.004804426	0.031980682	0.023794729	0.013916362	0.030049386	0.021740809	0.012492668	0.00442437	0.00536349	0.024553616	0.002735821	0.004965941	0.028694531
	101410	0.043545153	0.041488796	0.00137532	0.042212512	0.033247866	0.002774207	0.022861632	0.038297884	0.019546535	0.023002077	0.0322682	0.020084612	-0.015933134	-0.00134007	0.024729865	-0.01383801	-0.000980157	0.025736347	-0.03845216	-0.031457279	0.000588274	-0.03212747	-0.033132613	0.00302835	-0.029938696	0.014455061	0.019245457	-0.025097569	0.006056021	0.021106986	-0.015082477	-0.013441416	0.019260788	-0.01051911	-0.010442258	0.021551374
	101915	0.081599243	0.035563499	-0.012074633	0.090439118	0.03300811	-0.017129842	0.018185195	0.039623056	0.004811534	0.018904507	0.033970952	0.002956051	0.008147256	0.033408377	0.013735183	0.00803438	0.029301159	0.013092831	0.100143507	0.018546669	-0.019280147	0.111018278	0.019724568	-0.02837261	0.010875786	0.048215266	0.009320103	0.009853593	0.040556889	0.007480763	0.031880766	0.018925384	0.01379146	0.034010381	0.018173518	0.011682756
	103414	-0.009067417	0.006842418	-0.002105321	-0.00439122	0.005314971	-0.007262001	0.009343461	0.018599955	-0.001910234	0.010241142	0.015195304	-0.00321501	0.005034193	0.018075164	0.015350128	0.005923175	0.016196189	0.017242035	0.022750093	0.025444338	-0.003654684	0.02024645	0.02068975	-0.004108087	0.013355692	0.032291822	0.001493779	0.013947386	0.026941691	-0.001334283	-0.013320968	0.004558978	0.024748404	-0.010220502	0.006445984	0.024630008
	103818	0.02789	0.004930299	-0.027715873	0.029773053	0.003622682	-0.035182569	0.029525431	0.017125847	-0.031914599	0.0319722	0.012094912	-0.039327905	0.029448645	0.005476123	-0.025204474	0.031501736	0.004150313	-0.032886319	0.03139437	0.021221999	-0.030286407	0.03503529	0.013920039	-0.036049597	0.032712631	0.032260612	-0.019263616	0.036330681	0.023894707	-0.022866264	0.017351272	0.000395636	-0.001804449	0.020256218	-7.21E-05	-0.003041709
	105014	0.051089521	0.034267668	-0.002013729	0.05163328	0.031518366	-0.007592745	0.0210215	0.031287134	0.004619062	0.019466609	0.027991869	0.002299632	0.00972732	0.004822649	0.021455031	0.009504721	0.007139385	0.022076773	0.044441346	0.035858341	0.002517486	0.04248827	0.032910816	-0.001385049	0.011114207	0.034909505	0.020574702	0.008536822	0.031075282	0.020491909	0.005762814	0.008886762	0.029555371	0.003799595	0.010787337	0.032197595
	105115	0.018079991	0.004156747	-0.005647682	0.022596793	0.002508899	-0.006737097	0.012215474	0.035809178	0.007998065	0.013551573	0.027502604	0.006527217	0.009827568	0.023346601	0.022027081	0.010037648	0.020191282	0.022023687	0.019515874	0.022002541	-0.017831676	0.023938859	0.016033227	-0.017984791	0.018770097	0.045560919	0.010806434	0.022026958	0.033475883	0.010736892	0.001562965	0.010132304	0.037200991	-0.000129246	0.01119901	0.038914725
	105216	0.00697525	0.024327772	-0.009680544	0.008027305	0.019578742	-0.011305952	-0.005940343	0.040957902	-0.012297226	-0.00864374	0.032814451	-0.017415429	0.00190735	0.013509768	0.025033996	0.003236706	0.013563485	0.027927816	0.010079293	0.04257077	-0.014394838	0.010255522	0.035332788	-0.019101363	-0.006847876	0.04366789	0.012184999	-0.009907814	0.037967198	0.009049275	0.003114155	-0.000155077	0.052703988	0.00478701	0.00474359	0.060329698
	106016	0.034126312	0.025036901	-0.001236775	0.036996137	0.023291051	-0.004171384	0.026219349	0.026945334	0.009393767	0.027974987	0.025749566	0.004856438	0.01873474	0.02194423	0.02526761	0.019272095	0.021793051	0.02461707	0.039052323	0.033511676	8.51E-05	0.042442705	0.031046752	-0.004383488	0.053896256	0.048307154	0.021781487	0.056698211	0.047013991	0.014704397	0.022644145	0.028618513	0.033215724	0.023322556	0.02615568	0.035229106
	106319	0.046839379	0.020026343	-0.009449006	0.049682625	0.015061497	-0.009328929	0.034863558	0.022952884	0.006434112	0.035838995	0.019988172	0.006766715	0.031636856	0.013025671	0.009321662	0.033482864	0.010256479	0.01196829	0.050337266	0.04521963	0.022215707	0.049169533	0.042189706	0.020754391	0.050917067	0.063852973	0.042352382	0.047775906	0.061163139	0.040223919	0.050056476	0.034627944	0.041264653	0.051207103	0.030977467	0.046176393
	106521	0.007000593	0.000689323	0.001451795	0.010138161	3.42E-06	-0.001545695	0.005567846	0.026551463	0.002178037	0.006689975	0.023156524	-0.003292577	-0.001130322	0.001983263	0.025038099	-0.001598732	0.002545253	0.027596336	-0.008770474	-0.008943198	-0.0036145	-0.007475777	-0.010008811	-0.005959904	0.003473243	0.032891944	0.001516177	0.003609093	0.027473198	-0.005234487	-0.002399236	0.004804478	0.026515843	-0.003775009	0.005785349	0.031262223
	107321	0.019960923	0.006147597	0.000333784	0.024590626	0.006897526	-0.001259769	0.024928037	0.014415608	0.001129483	0.026429364	0.01443595	-0.001246129	0.01001452	0.001958674	0.006406679	0.013447481	0.002119452	0.007918979	0.017759295	-0.00729291	-0.008662169	0.027865972	-0.006685128	-0.008936765	0.035872299	0.014685255	0.00397855	0.042035975	0.014355	0.001916773	-0.001641424	-0.003122685	0.008279414	0.001221072	-0.004339023	0.012249295
	107422	0.039919116	0.001115057	-0.007221284	0.042733021	0.006303059	-0.010563972	0.022892835	0.026826197	0.002051459	0.02292935	0.024488615	-0.000688848	0.021590389	0.012172585	0.026350291	0.020869693	0.014972492	0.028811567	0.025670208	0.020762544	-0.00467664	0.02539148	0.019964725	-0.008151433	0.007921328	0.042961456	0.011318695	0.004755761	0.036120541	0.009546706	0.011180469	0.015497047	0.020785961	0.011335483	0.01788233	0.01910536
	108121	0.028921781	0.034994785	0.008125055	0.026845068	0.030070489	0.006347253	0.013579103	0.0312184	0.008682521	0.012165274	0.02597555	0.004888033	0.021754051	0.03210552	0.018531146	0.020693282	0.02871638	0.014982687	0.018124444	0.024743581	0.011749148	0.01737849	0.02011469	0.012034059	0.020812452	0.04223188	0.014636067	0.019303145	0.035335671	0.010339895	0.021197202	0.023326313	0.035613187	0.018950533	0.02378474	0.034727741
	108323	0.056503739	0.026632976	-0.008462053	0.051325191	0.028278666	-0.015783196	0.010776208	0.006996744	0.053430855	0.007636118	0.010363451	0.066378906	-0.00249683	-0.008019282	0.036769748	-0.003397202	-0.004688755	0.047013167	0.041155893	0.018461239	-0.021162843	0.039627727	0.016358236	-0.028832145	0.024823654	0.049385734	-0.006977902	0.022795714	0.041014768	-0.015042416	-0.000507051	0.00506835	0.064372219	-0.002485845	0.006932792	0.079842485
	108525	0.034116421	0.023070144	0.010547815	0.034048602	0.023185724	0.011365495	0.014422942	0.024613529	0.017348776	0.013778673	0.022654653	0.017909918	0.005050997	0.016892869	0.023210032	0.004012523	0.016258694	0.026476584	0.02632127	0.02794278	0.021131672	0.025215609	0.027309131	0.022361647	0.015411148	0.035234716	0.031153811	0.013013423	0.033658113	0.032384213	-0.001389991	0.011462556	0.021436382	-0.002524843	0.011387711	0.024409868
	108828	0.016954893	-0.009168906	0.000340983	0.019694569	-0.009532153	0.002442178	0.017343063	0.045685951	0.033626504	0.01553675	0.039201461	0.034542393	0.014476807	0.049780432	0.04352694	0.012102532	0.044762775	0.043714877	0.024002114	-0.009036116	-0.001706448	0.028544564	-0.0102454	0.001561373	0.022747632	0.045370806	0.037152749	0.022002771	0.037928484	0.040178075	0.008625222	0.036603756	0.040558401	0.00665688	0.031893712	0.04379433
	109123	0.02646675	-0.002967502	-0.00423374	0.026895093	-0.001203385	-0.003869168	0.02115714	0.030059082	0.027175013	0.01870499	0.028162245	0.027478816	0.023279108	0.033217829	0.03687669	0.021579761	0.03177296	0.038484089	0.020250332	0.008803976	-0.01297908	0.019402251	0.006406263	-0.012174829	0.025264075	0.038101103	0.031818837	0.022233462	0.035919067	0.034856036	0.003087887	0.023418602	0.04139908	0.002142413	0.023844343	0.045183282
	111312	0.008010712	0.003113356	-0.014383178	0.009448861	3.91E-05	-0.014375577	0.009221476	0.018691951	-0.019399187	0.009108935	0.012639656	-0.022355439	-0.000416638	0.001771753	0.010153213	0.002133357	1.56E-05	0.013548872	0.019782767	0.017285489	-0.003293178	0.018554753	0.014918087	-0.005048799	0.01059499	0.038819961	-0.011129521	0.01150099	0.030305484	-0.015046181	-0.000938784	0.019924702	0.016464116	0.001289196	0.018379323	0.016172346
	111413	0.006777435	0.014656832	0.002113233	0.01011136	0.014456056	0.000536018	0.004152638	0.021387231	0.01199301	0.007508027	0.020314857	0.008186663	0.018253017	0.014387975	0.023450693	0.020045813	0.015394208	0.022905093	0.03456622	0.040540334	0.004658035	0.036922969	0.040378843	-0.002358115	0.008618127	0.028880818	0.023382656	0.013204617	0.025132049	0.025183627	0.015768707	-0.000278723	0.019954007	0.016511323	0.005249041	0.017204382
	111716	0.023575082	0.032742959	0.00157704	0.020900287	0.030313672	-0.002300879	0.023416994	0.044759214	0.006235045	0.020040883	0.040022362	0.002737074	-0.02004737	0.016296448	0.030421266	-0.021285165	0.013850668	0.033222038	0.042383589	0.038523253	-0.006105586	0.041918918	0.034323141	-0.010330754	0.007040456	0.049859811	0.011225235	0.004049097	0.042210136	0.007919242	-0.024436787	-0.002371531	0.020749079	-0.024534643	-0.003563686	0.025061272
	113215	0.031124635	0.007014574	0.00788016	0.037464608	0.007213584	0.008043355	0.019193508	0.015225874	0.013959668	0.02224463	0.0144104	0.013975397	0.016946876	0.002997414	0.01398256	0.02211008	0.003778383	0.015108547	0.018420804	0.009123741	0.013834051	0.021579303	0.009995148	0.013868575	0.024556573	0.024175202	0.025866279	0.026893053	0.024030013	0.025380997	0.021488424	-0.001743235	0.029874496	0.027558032	0.00135383	0.033352714
	113619	0.023989702	0.014828361	-0.044725422	0.029367695	0.007565992	-0.050095689	0.024227491	0.041759752	0.001337807	0.02196167	0.035476018	-0.003819682	0.025652073	0.061427087	0.064274482	0.016512511	0.058713526	0.062653676	0.020760583	0.016250703	-0.041420296	0.025390128	0.00918556	-0.046450976	0.035236988	0.066211239	-0.000463815	0.032356441	0.055095669	-0.007970231	0.008601116	0.032348063	0.066521138	0.001634072	0.035874885	0.069014601
	113922	0.028756382	0.004703196	-0.026079837	0.030444475	0.002005845	-0.027920647	0.011559955	0.026674576	0.025520392	0.009326717	0.02646317	0.024204772	-0.00216035	0.011577466	0.046280067	-0.003126973	0.015370633	0.049564593	0.01701187	0.007149801	-0.018994287	0.018389598	0.004321161	-0.022576174	0.013254323	0.025104383	0.028825011	0.011033402	0.02430553	0.028427418	0.006315207	0.016902797	0.023279505	0.006814031	0.018150166	0.021316139
	114419	0.060518764	0.038442127	0.020048872	0.060338762	0.039166175	0.016932527	0.035926249	0.051828474	0.020783171	0.034464385	0.048073865	0.017645543	0.053774416	0.030942151	0.025468722	0.052749939	0.033240065	0.022725463	0.018671669	0.040075757	0.023256334	0.016825955	0.034837324	0.022352161	-0.000463072	0.041880313	0.020912848	-0.003469492	0.034290731	0.020534381	0.005314458	0.005758503	0.026321096	0.001999738	0.006441442	0.02686704
	115320	-0.001628635	-0.003913991	-0.040041707	-0.000168622	-0.004504643	-0.048008773	0.033068463	0.027280459	0.028269794	0.031362161	0.021597451	0.036417298	0.009693851	0.025776258	0.039016508	0.008046604	0.02381785	0.041658297	0.03393979	0.027167831	0.023641927	0.031941254	0.021323664	0.031305514	0.018367823	0.042568587	0.025488084	0.014060245	0.03637775	0.027928833	-0.021417068	-0.007463541	-0.023186179	-0.020302726	-0.004452082	-0.032889675
	117324	0.040334851	0.015534969	0.007650091	0.039990131	0.017812848	0.006767714	0.040821269	0.035604376	0.02067551	0.039844446	0.034806892	0.018750757	0.025508955	0.022637995	0.018073741	0.025072506	0.022279667	0.017581897	0.055890772	0.022239465	0.012199274	0.056530356	0.024374016	0.011204725	0.051942933	0.04522441	0.030714573	0.051378988	0.043935489	0.028774183	0.027649311	0.0361754	0.036812846	0.028297754	0.034558441	0.036237724
	118528	0.016460771	0.020479938	-0.017606119	0.019017262	0.013261503	-0.019181371	0.017273307	0.049835883	0.009220843	0.019150691	0.038976785	0.008049604	0.016849723	0.016054291	0.025500324	0.0159175	0.015804239	0.02878451	0.01018338	0.016514868	-0.012120959	0.012841817	0.010007233	-0.015614663	0.012305903	0.038386524	0.014353179	0.015914487	0.029040826	0.012267799	-0.006135851	-0.022263369	0.014623136	-0.007638449	-0.015850738	0.016504515
	118730	0.012757692	-0.007777551	-0.022767315	0.01447315	-0.009405796	-0.024596045	0.008218684	0.042940259	0.008028074	0.006792278	0.03612395	0.00327673	0.004963623	0.036956713	0.030105829	0.003095855	0.032873753	0.03070138	0.014046211	0.014401784	-0.020073581	0.014209843	0.01050191	-0.022735801	0.013803922	0.040057927	-0.001245373	0.013968501	0.03354926	-0.006359588	0.004708319	0.012661897	0.014533414	0.004852917	0.011549461	0.015166992
	118932	0.009846064	0.020533884	0.009864816	0.011613077	0.021136632	0.006974545	0.019412395	0.03844814	0.009461052	0.016888237	0.036324196	0.005147673	0.018010698	0.016396189	0.035032131	0.016346764	0.019263454	0.035939775	0.020698376	0.045085866	-0.000577579	0.018446047	0.042582754	-0.006997272	0.035473026	0.047499679	0.015885765	0.030396849	0.045467898	0.010779244	0.016013334	0.002421755	0.052469164	0.015282792	0.009862822	0.056073304
	119833	0.022527855	-0.021117132	-0.022445282	0.025996029	-0.015906775	-0.023288507	0.018133614	0.030232104	0.007228221	0.01808819	0.02854939	0.005021569	0.023764014	0.018796565	0.012527509	0.026200563	0.018487735	0.012538787	0.033887308	0.005081034	-0.011821884	0.036868524	0.007145495	-0.013089087	0.028288322	0.041441564	0.008190229	0.024312144	0.039765645	0.003547053	0.009458987	-0.022349015	-0.000253443	0.010875624	-0.016261635	0.000113002
	120111	0.033036802	0.0379287	0.003538108	0.0287601	0.035909407	0.000300305	0.015591431	0.028201347	0.010624157	0.012774313	0.026666643	0.008589259	0.003029499	0.006076341	0.027838029	0.001258389	0.007537307	0.031745903	0.020746062	0.026296569	0.009438665	0.017322091	0.02569963	0.007656947	0.013178937	0.025163984	0.018298754	0.009772136	0.02477004	0.017990202	0.000564061	0.005624251	0.02546051	-0.000889253	0.007936458	0.028802184
	120212	0.014281207	0.014782427	-0.009854716	0.012862494	0.010705999	-0.008446872	0.016592551	0.032362148	0.00092679	0.012673114	0.029316422	-0.003499689	0.005080539	0.005841799	0.027392311	0.004301495	0.007645164	0.027794626	0.016950652	0.026769582	-0.008178364	0.014000357	0.021891518	-0.009173222	0.023549479	0.048268896	-0.007446462	0.018418195	0.040954374	-0.010947396	-0.013014122	-0.00525422	0.020839373	-0.012078948	-0.006118198	0.026206693
	120515	0.023728866	0.023858195	0.008660896	0.022890909	0.021781828	0.008422932	0.002632045	0.035149481	0.029697048	-7.43E-05	0.032357544	0.028957933	0.002849309	0.030593861	0.033021003	0.00212889	0.028097674	0.033502772	0.019199042	0.008629885	0.001065703	0.019751025	0.007474388	0.002040225	0.024580454	0.046891462	0.030645249	0.022465454	0.041858695	0.030076595	-0.002327137	0.026819209	0.0365493	-0.003218328	0.023680314	0.037947569
	121618	0.02223568	0.006437934	-0.011353672	0.023614639	0.005235058	-0.012290517	0.020049753	0.026176602	0.007595973	0.018745478	0.021771956	0.007412584	0.004910121	0.019262858	0.023829896	0.003009597	0.017232519	0.025000336	0.020657836	0.01058677	-0.001515918	0.02122804	0.009522262	-0.001143156	0.02498964	0.050369136	0.027330309	0.022022933	0.042849828	0.028524444	0.000119915	0.018379701	0.03356009	-0.001296133	0.017858012	0.035857663
	122317	0.040086776	0.022660827	0.005963702	0.041672155	0.021520229	0.006818112	0.027153159	0.036488861	0.017891575	0.027531842	0.032771282	0.017642237	0.020255296	0.022961419	0.024462324	0.021433398	0.021793209	0.026762731	0.048502669	0.033669513	0.008199638	0.050500005	0.031839486	0.007241687	0.049516458	0.051629383	0.018908601	0.048898425	0.047254737	0.017878337	0.03595423	0.021209441	0.014594685	0.035343289	0.020952931	0.01646726
	122620	0.027701087	0.010854932	-0.021156806	0.027114205	0.008209438	-0.023801476	0.020564355	0.048537593	0.016365528	0.018399155	0.042793944	0.013561239	0.015703337	0.044053741	0.037451491	0.014431122	0.040671159	0.037617065	0.022742704	0.013020812	-0.028763257	0.022417063	0.009672495	-0.033358779	0.024111757	0.070105337	0.027838666	0.020988794	0.061636429	0.02387497	0.00552525	0.025414411	0.038681563	0.005240571	0.025251644	0.041011188
	124422	0.030667888	0.009916114	-0.028305842	0.03036488	0.009340739	-0.036178894	0.02529927	0.045684084	0.03620068	0.02295923	0.044548109	0.032341696	0.019222165	0.042948458	0.060439475	0.018554613	0.041120596	0.0637848	0.034529645	0.043638244	0.010854325	0.033436023	0.037388168	0.009346737	0.038356625	0.06559509	0.052282397	0.036168199	0.062539689	0.04741573	0.014437632	0.047086895	0.068381056	0.013642029	0.04537167	0.071034849
	124826	0.028174076	0.009361012	-0.006162834	0.029309561	0.006192582	-0.008062411	0.025460793	0.049618501	-0.001547115	0.021926949	0.042795211	-0.008346857	0.007160747	0.025656773	0.044985678	0.009632221	0.025763614	0.044974983	0.034842793	0.006100613	-0.015567954	0.037862897	0.007044249	-0.018184727	0.038172569	0.047747895	-0.007497548	0.035715066	0.041978948	-0.012745023	0.007030703	0.008412882	0.034520406	0.010563783	0.012888157	0.036284041
	125525	0.017979093	0.018930061	0.003105023	0.021065794	0.017887158	-0.001253644	0.014448229	0.026714271	0.001322713	0.015446864	0.021886237	-0.00150292	0.003802956	0.018476153	0.011508019	0.004174694	0.015113411	0.012593505	0.030645058	0.025876865	0.000309344	0.032706257	0.023655245	-0.003730889	0.019097222	0.029564461	0.006221238	0.018052066	0.024282074	0.005743433	-0.011451841	0.005707168	0.013595451	-0.014978452	0.002727999	0.019643756
	126325	0.029137874	0.020261312	-0.021442961	0.027990928	0.015302905	-0.024177609	0.026121439	0.034718279	-0.006457699	0.02357175	0.028736889	-0.009750782	0.012832427	0.02338776	0.023731457	0.011131387	0.022484107	0.022969874	0.033437498	0.02158319	-0.009492009	0.032967072	0.019688636	-0.013738389	0.030092215	0.057613775	0.027534088	0.026827285	0.05300682	0.023826925	0.003393058	0.017076407	0.027202724	0.001610477	0.018575344	0.024213107
	127630	0.022275319	0.00963478	0.0022872	0.028047875	0.008590832	0.00267174	0.016651168	0.034558766	0.014738939	0.018325519	0.030653974	0.012686987	0.018830044	0.019880861	0.025079437	0.022366714	0.019070132	0.026502298	0.033692896	-0.001172295	-0.004966963	0.039673049	0.00213442	-0.00480033	0.047174603	0.017260058	0.009759272	0.052340642	0.019878693	0.008300884	0.03874404	-0.005836269	0.017150734	0.04423954	-0.001218159	0.021763047
	127933	0.029129922	0.033105522	-0.008256422	0.029924925	0.025656603	-0.00994754	0.010854487	0.040573727	0.035566192	0.007698291	0.036459338	0.034650996	0.001784451	0.008611165	0.03363996	0.000838302	0.01025769	0.037691846	0.032388154	0.041353058	-0.009569771	0.031543169	0.033651546	-0.010741681	0.022739794	0.059580911	0.036005784	0.01881054	0.053727556	0.03460864	-0.000302159	-0.000908606	0.025192728	0.000389456	0.001979781	0.028369499
	128127	0.032030024	0.043594472	0.008633537	0.02433682	0.040697128	0.003899696	0.020691155	0.054278787	0.021254053	0.013996165	0.051691879	0.015717739	0.001884905	-0.006474218	0.022693167	0.002920179	-0.003284452	0.025594991	0.022742972	0.038959689	-0.000934528	0.016917812	0.032783728	-0.003367281	0.029695064	0.065280452	0.018074507	0.021610236	0.060703054	0.01136629	-0.00233626	-0.004325371	0.036872726	-0.001194335	-0.001871159	0.042724852
	129028	0.027715217	0.043336682	0.000398286	0.028554702	0.038276657	-0.002515394	0.015332257	0.04678962	0.012872437	0.014798689	0.040597893	0.010188919	0.008823438	0.032723244	0.030867301	0.006739651	0.030691642	0.029898647	0.025443858	0.054857749	-0.004116069	0.024681745	0.046514519	-0.008153177	0.019911319	0.068543509	0.023705961	0.017285133	0.059025992	0.021173084	0.009018715	0.032444768	0.050900918	0.006339963	0.031824842	0.051985323
	130013	-0.001726054	-0.021847108	-0.026019966	-0.003251843	-0.023884598	-0.020866629	0.005490933	0.024307927	-0.003122179	0.002367344	0.019374024	-0.00488942	-0.004012455	0.022758845	0.034284025	-0.003067415	0.022385757	0.035034239	0.011638395	0.036038816	0.008241191	0.011277697	0.031971026	0.005355726	-0.018625602	0.031204671	-0.001637384	-0.020730913	0.019310091	0.004094311	-0.022994446	0.027502296	0.009412369	-0.024261804	0.017314309	0.016320085
	130316	-0.004015791	0.008912318	-0.005508821	-0.005039047	0.003098418	-0.004200937	-0.007893881	0.016891012	-0.009273891	-0.010192989	0.009477006	-0.009303969	-0.010914505	0.010641102	0.00668248	-0.012503886	0.00639006	0.008720066	-0.002232558	0.002282793	0.004119815	-0.000546774	5.34E-05	0.005159982	-0.003570841	0.013073059	0.007179413	-0.000244328	0.009466029	0.007049005	0.008794153	0.014702148	0.042133342	0.009178552	0.019635575	0.047052026
	130922	0.027655346	0.014099197	-0.025010148	0.029755656	0.007642054	-0.024095586	0.016647773	0.04271004	0.004046326	0.01322733	0.034524377	0.001010913	0.008340438	0.020429607	0.023027536	0.006920144	0.021481527	0.020406434	0.035810228	0.035577528	-0.008194678	0.035506457	0.02602182	-0.008214255	0.026279727	0.060940828	0.007109248	0.02111675	0.0490367	0.004139586	-0.004583582	-0.007316898	0.026734049	-0.003486422	0.00072912	0.026160868
	131217	0.063230723	-0.013366124	-0.025005212	0.066202618	-0.007728814	-0.026945155	0.00282209	0.034126341	-0.001875715	-1.15E-05	0.026851347	-0.002593778	-0.004187851	0.043707494	0.049211692	-0.005852411	0.039203208	0.052166518	0.042526875	-0.004443889	-0.025357939	0.043744173	-0.002777057	-0.027150117	-0.009931475	0.030449366	-0.00156257	-0.014550676	0.023197511	-0.002012092	-0.029852273	0.0246982	0.047506865	-0.032320011	0.020827904	0.052700579
	131722	0.036935668	0.035184268	-0.016654022	0.04007579	0.028653653	-0.018993087	0.007065803	0.038180191	0.011659912	0.004977108	0.031480614	0.01094279	-0.000986364	0.031576194	0.014117846	-0.003658368	0.027261559	0.012714183	-0.031365037	0.001663366	-0.007362963	-0.032271229	-0.002925518	-0.007086634	0.020650707	0.046583451	0.020396966	0.022140136	0.038837653	0.022112902	0.015092641	0.011499998	0.026061654	0.015080821	0.012716678	0.029079972
	131924	0.025784064	0.008816555	-0.011644606	0.025286337	0.007942504	-0.013674292	0.015877699	0.041534938	0.002958533	0.014453477	0.035522819	0.000815857	0.002875558	0.021720238	0.021816036	0.002193423	0.020230232	0.022801129	0.02344933	0.042180851	-0.013572605	0.022516556	0.032712437	-0.013763865	0.019005323	0.062636346	0.0087025	0.015250751	0.054094069	0.006568598	0.007794129	0.017321868	0.032802518	0.007556114	0.017915791	0.035911165
	133019	0.029017176	0.015432137	0.013074641	0.029774493	0.013764056	0.015929656	0.027912281	0.038050409	0.023136759	0.02763588	0.033553053	0.024335178	0.022057896	0.02368491	0.019461567	0.022843475	0.020484498	0.021738976	0.036231138	0.02651651	0.018673679	0.036813553	0.02349334	0.02215381	0.036839701	0.049176514	0.028079659	0.036165126	0.042506654	0.030351184	0.023010164	0.022574883	0.021331454	0.02320068	0.018740155	0.024544938
	133625	0.041934319	0.041100632	0.004241576	0.041231643	0.037791546	0.002669779	0.012798192	0.042125478	0.011914827	0.010085178	0.039530069	0.007568436	-0.002372468	0.022650128	0.025960118	-0.004996927	0.022217039	0.025312031	0.037958976	0.046363413	-0.001130104	0.037604388	0.040291037	-0.003120538	0.024731847	0.063517258	0.011032123	0.021351384	0.059234705	0.004091303	4.10E-05	0.014481658	0.032337248	-0.001567794	0.016558632	0.032903329
	133827	0.064078994	0.021000411	-0.002591362	0.065574065	0.021429231	-0.004633033	0.078920692	0.021375798	0.001392547	0.080848269	0.023583382	-0.001515726	0.065764338	0.014012552	0.013519286	0.068503141	0.018394478	0.011385511	0.038828537	0.023385508	-0.004066881	0.038751509	0.019438395	-0.004759383	0.033238016	0.032754164	0.00755163	0.031518571	0.028243911	0.007113888	0.023021158	0.026867736	0.015325037	0.021650124	0.022586245	0.017385807
	133928	0.044319104	0.025761032	0.014496952	0.046902999	0.026530959	0.014693948	0.042055108	0.027142199	0.020991592	0.043830775	0.028773826	0.020197397	0.033573352	0.01949203	0.019156333	0.035691187	0.021851599	0.019295754	0.03310765	0.016469011	0.010875703	0.035243951	0.018600013	0.011416995	0.03612629	0.025832517	0.020341795	0.03742943	0.026832636	0.02059694	0.024644373	0.01019976	0.012800382	0.026360353	0.013468824	0.013254109
	135225	0.039611813	0.035124827	0.009876369	0.03831955	0.032719597	0.008692132	0.027793165	0.039834592	0.033832729	0.025379188	0.038837727	0.031885736	0.020153061	0.034616135	0.046503488	0.018026808	0.035652399	0.046046466	0.038052682	0.044518407	0.008100283	0.03703583	0.038600177	0.005377373	0.036935236	0.057110183	0.0393277	0.034383398	0.055327851	0.03524838	0.01127026	0.037520733	0.048080906	0.012116124	0.036569312	0.047132447
	135528	-0.000299447	0.008709084	0.004554308	0.00298462	0.004635865	0.005446416	0.008023135	0.032952037	0.00418287	0.006445371	0.030585656	0.000552831	0.008837909	0.025946045	0.023132909	0.007485678	0.026228784	0.022071026	0.01193716	0.022608943	0.007910252	0.01140935	0.020414362	0.005861003	0.01880246	0.054938845	0.011918474	0.014179617	0.052840531	0.00639667	-0.002229645	0.028504938	0.037084706	-0.003384721	0.027234003	0.038080718
	135932	0.027189767	0.007578998	0.000754426	0.03019039	0.007725475	0.002288863	0.024486298	0.015293555	0.013620095	0.026723532	0.016334036	0.014610887	0.014875794	0.004745938	0.018426562	0.017254489	0.007844704	0.020976696	0.020194765	0.008499146	0.008539527	0.022012403	0.010084908	0.009880738	0.028683329	0.021975087	0.024238033	0.030451594	0.024361482	0.025152475	0.001692684	-0.015893321	0.01991057	0.004404904	-0.008481401	0.023896551
	136227	0.054884646	0.003805996	-0.018751103	0.059412368	0.00485287	-0.022415878	0.032959376	0.047091842	0.005396209	0.034728259	0.037546858	0.002658996	0.003316232	0.025955202	0.032826677	0.004581412	0.022158395	0.03445312	0.046506349	0.016244547	-0.014483384	0.050177738	0.014639908	-0.019720132	0.027712749	0.0402411	0.000702547	0.029181961	0.032436304	-0.00388069	-0.018946817	0.003555666	0.035912089	-0.020572755	0.004192742	0.039472319
	136833	0.033728074	-0.005527924	-0.000205613	0.039313864	-0.002270789	0.002891729	0.040303864	0.035174645	0.027533676	0.041908707	0.032830898	0.030835029	0.011393559	0.024711404	0.042647466	0.012045233	0.025345173	0.047599971	0.030660309	-0.006738205	-0.008624142	0.035094608	-0.004939035	-0.008035739	0.0316342	0.017884573	0.006895599	0.033027615	0.017390687	0.005995404	0.006001166	0.008725022	0.006087313	0.007236397	0.009101397	0.004382358
	137633	0.028988656	0.019362761	-0.013723593	0.028719973	0.01570626	-0.013194949	0.026694153	0.038853031	0.002816811	0.024610257	0.032647718	0.002074742	0.023451213	0.05740346	0.049389973	0.021997618	0.051867854	0.051566362	0.044358078	0.037682261	-0.01144288	0.044645779	0.032376859	-0.01144897	0.041657992	0.072031885	0.013312553	0.037803102	0.059619814	0.012890706	0.010030044	0.032846697	0.039685305	0.010122008	0.029964101	0.043860901
	138231	0.033237513	0.003742624	0.012218689	0.031243861	0.00968937	0.012226894	0.03232817	0.03890387	0.022150004	0.030725587	0.036099527	0.020635109	-0.010647206	0.018050829	0.013336722	-0.01129556	0.013038943	0.013806445	0.022095948	0.028097972	0.012417826	0.022318663	0.02220415	0.012477325	0.044898037	0.045387935	0.039461371	0.043302495	0.043980878	0.039275099	-0.038522117	0.005954145	-0.014353639	-0.038643081	-0.001106492	-0.016007336
	138534	0.06521143	0.019602535	-0.005412228	0.065206431	0.01982248	-0.00668116	0.042903937	0.036445811	0.013052386	0.040724497	0.035763822	0.009870668	0.038106762	0.024630541	0.023887128	0.037552968	0.024976676	0.024830637	0.077569067	0.041912589	0.003740778	0.073333248	0.043441761	0.000502902	0.005276668	0.052859791	0.036262918	0.000589895	0.052639645	0.030242302	0.02228689	0.031415671	0.038090505	0.020258427	0.033286765	0.03814147
	139637	0.027176524	0.00155596	-0.01018002	0.02578483	0.004028276	-0.011913289	0.016989652	0.030829137	0.005344075	0.013275962	0.026796276	0.003340736	0.01997173	0.034045823	0.016695654	0.017171802	0.03011772	0.014662683	0.040351637	0.011092535	-0.003224763	0.03834765	0.014129803	-0.005484646	0.0269858	0.046363823	0.009688762	0.0214477	0.041979183	0.005928697	0.009044413	0.033266112	0.027332971	0.007339381	0.031129867	0.026413338
	140117	0.020657178	0.032677382	0.008682364	0.019618787	0.028424529	0.006339516	0.009529775	0.042742912	0.010270055	0.007035878	0.036194414	0.006731944	0.002000994	0.025224986	0.035781756	0.000846692	0.022892151	0.038442105	0.031905409	0.038434688	0.005471878	0.031487327	0.034277514	0.000724826	0.016982079	0.056613848	0.018739564	0.013570207	0.048963372	0.014380621	-0.002674981	0.019707231	0.063945442	-0.003973378	0.020274384	0.07258781
	140420	0.02072406	0.037756205	0.024788423	0.020252595	0.033671129	0.027430924	0.016871588	0.033049539	0.012760068	0.015899269	0.029902868	0.012521139	0.014642222	0.025162503	0.018150669	0.013342916	0.023853816	0.018666798	0.024186606	0.034777869	0.000240086	0.023471242	0.032257948	-0.001942684	0.024518605	0.045124315	0.010259935	0.024076859	0.041500285	0.007936472	0.023057703	0.036355484	0.032958403	0.01890062	0.035295088	0.035706718
	140925	0.043932732	0.040026229	0.018521944	0.044176359	0.034508206	0.01879777	0.036008082	0.034317594	0.022831609	0.034962315	0.031489339	0.024096679	0.033541765	0.031128913	0.029140465	0.032514822	0.030019447	0.030788653	0.048658025	0.037651118	0.025728118	0.047517877	0.035739351	0.027824583	0.042352132	0.0410516	0.028013742	0.040410209	0.038316309	0.029742066	0.032147061	0.037319236	0.035352394	0.030358313	0.035287123	0.037843734
	141422	0.020144541	0.028131051	-0.007235754	0.020456789	0.025190273	-0.007135584	0.018511089	0.052471939	0.015785076	0.01674759	0.04743278	0.014153276	0.011623262	0.033800934	0.031896289	0.010571744	0.032365341	0.033768799	0.016108019	0.03256936	0.000527348	0.017017217	0.0276556	0.000911209	0.026471667	0.05721603	0.017090013	0.024347661	0.051673144	0.016261494	0.007337105	0.030010762	0.033155598	0.007972968	0.027972702	0.036712661
	141826	0.024241375	0.024042007	-0.013658847	0.026707353	0.016772747	-0.014410863	0.02091969	0.047001813	-0.003721323	0.019033007	0.037869863	-0.007654878	-0.009120267	0.010720313	0.028177291	-0.010156346	0.011396345	0.029310733	0.010729879	0.028362224	-0.00662373	0.011326142	0.019597948	-0.007814228	0.012961295	0.05077729	0.004632742	0.009703336	0.040604662	0.001218048	-0.008737109	0.005524851	0.03331136	-0.00947842	0.008003753	0.034535587
	144226	0.013673994	0.015803942	-0.008078623	0.016609356	0.009493721	-0.008015539	0.014923465	0.026025342	-0.002729971	0.015456337	0.020642765	-0.00449908	0.008754037	0.021705911	0.017390918	0.011354845	0.01710216	0.018783612	0.012946737	0.011790564	0.00024196	0.013002411	0.009638533	-0.000389021	0.020986244	0.02800511	0.006313487	0.021134829	0.024576936	0.004727012	0.009533605	0.018181292	0.024400821	0.008335763	0.018935848	0.024362499
	144832	0.034074396	0.00830171	-0.008255682	0.035634935	0.006296965	-0.008600815	0.024826029	0.045786496	0.000598586	0.022003451	0.037024058	-0.003788089	-0.015193794	0.007990301	0.025814183	-0.016695632	0.008266459	0.026266055	0.04217197	0.017618634	-0.006894652	0.04174567	0.016264182	-0.010336339	0.022035157	0.053739093	0.020383669	0.013960125	0.047867496	0.015410756	-0.010370476	0.004790628	0.024376545	-0.011443592	0.005412063	0.026059939
	145834	0.011394065	-0.019057157	-0.041608512	0.015611471	-0.018807819	-0.044610731	0.023266694	0.05101224	0.015152793	0.021057582	0.0456178	0.01021612	0.00139436	0.025242159	0.031503029	-0.001870116	0.02504573	0.031275719	0.030154165	0.02453525	-0.012411176	0.031995367	0.022083979	-0.018654877	0.015653189	0.057707604	0.034014672	0.013372093	0.053506013	0.028871927	-0.010024818	0.004545886	0.037472218	-0.013390464	0.007460642	0.040799331
	147737	0.019343376	0.05131565	0.01571642	0.01805691	0.042432308	0.01579925	0.015355366	0.049091045	0.015997862	0.013471744	0.04076359	0.01359071	-0.00736637	0.011724517	0.021072881	-0.009944268	0.010772313	0.021962069	0.011877055	0.043666981	0.004623237	0.007867424	0.038497198	0.000626603	0.015833864	0.064438693	0.024082329	0.011061611	0.056383107	0.021394208	-0.007359929	0.006219886	0.030415032	-0.006223775	0.004617035	0.035574928
	148032	0.043870803	0.046136454	0.014208385	0.0413533	0.04142765	0.015729558	0.027617056	0.049202256	0.016103508	0.023821702	0.044014048	0.014436758	0.007412037	0.034101792	0.027539944	0.005337492	0.031763557	0.026188709	0.053723551	0.065433569	0.016934002	0.049683806	0.05849424	0.017926728	0.048635755	0.076256767	0.016332053	0.043219391	0.067489825	0.013984486	0.000804834	0.008509085	0.021051245	0.000131809	0.010673538	0.020423511
	148335	-0.014659212	-0.020734098	-0.005884885	-0.011535911	-0.019988364	-0.007290151	0.049554497	0.052023467	-0.000378328	0.044552308	0.048192848	-0.00662487	0.0186227	0.024229744	0.015737299	0.014287955	0.025243949	0.015828518	-0.007728739	-0.007453471	-0.014092067	-0.009499073	-0.007463614	-0.017357385	0.026543956	0.035914734	0.000927174	0.023843983	0.033363581	-0.004624769	0.038057275	0.039492674	0.017465839	0.03373044	0.037069827	0.018234668
	148840	0.026604408	0.026444349	0.003379011	0.02670563	0.021445964	0.003710052	0.020414291	0.040719934	0.005639055	0.018939517	0.033709388	0.004523631	0.013006103	0.026406841	0.027697695	0.014540225	0.02402303	0.028283251	0.036059726	0.014716467	-0.00477834	0.038444612	0.013582204	-0.00857712	0.029808473	0.029806506	0.016680002	0.030840194	0.026935386	0.01433396	0.002802312	0.001862126	0.025123803	0.004483446	0.001896161	0.029862933
	148941	0.022077363	0.039452348	0.016400859	0.020680349	0.03406556	0.014515355	0.028864339	0.041888017	0.020265501	0.026635218	0.03673562	0.017290942	0.022714507	0.02413727	0.029310545	0.021067917	0.021193994	0.032211538	0.019027982	0.033149149	0.011135525	0.017353322	0.029035065	0.007917041	0.011238962	0.028783625	0.014582319	0.008606892	0.024474964	0.01265711	0.00587421	0.011856538	0.024462247	0.004711922	0.012322019	0.02608481
	149337	0.02248851	0.024484983	-0.007799228	0.022081008	0.019462563	-0.008226706	0.01181794	0.031179966	0.007325284	0.010242189	0.025741657	0.004859671	0.00230623	0.007644676	0.023911215	0.001782466	0.007979196	0.024880076	0.019925678	0.022862539	-0.007485025	0.019221075	0.017951872	-0.008896541	0.018674096	0.036539461	0.008789603	0.017397162	0.031194011	0.004372464	0.001920127	0.014315804	0.016839946	0.000673269	0.012020505	0.016578505
	149539	0.043929048	0.036388442	0.011234844	0.047291931	0.036915451	0.002387032	0.031778984	0.043166753	0.012197013	0.031477377	0.038493764	0.007246802	0.018579273	0.038182791	0.030882666	0.016630521	0.035571367	0.030196827	0.032510158	0.025875635	0.011039328	0.033891685	0.024732588	0.011315388	0.045033839	0.066615298	0.023306342	0.042955093	0.05868255	0.020332539	0.027924692	0.042606182	0.024948679	0.027824767	0.038155623	0.021670686
	150726	0.044909518	0.022406643	0.001861901	0.046995148	0.022747757	-0.000297911	0.015410494	0.038757369	0.018418478	0.013648833	0.035324004	0.014743925	0.015881443	0.026560472	0.025898496	0.015761413	0.026750106	0.02523586	0.05242978	0.058745515	0.023888208	0.049874354	0.054897059	0.020903027	0.033568438	0.068993092	0.031785183	0.029875241	0.063974284	0.026620859	0.010945999	0.015880862	0.026709298	0.010994355	0.018122111	0.029094994
	151627	0.023545856	0.023659138	-0.005872867	0.022221692	0.020782251	-0.007019123	0.019634778	0.044829998	-0.004240181	0.016450372	0.03726463	-0.006640681	0.000908861	0.023189776	0.022420222	-6.36E-05	0.022376208	0.021228129	0.033010624	0.030341612	-0.000793756	0.033393834	0.024376558	0.001210159	0.018832205	0.048852719	-0.01226034	0.015133835	0.039599445	-0.015836213	0.00293912	0.018107347	0.024957966	0.003239718	0.017033562	0.026516337
	152831	0.041020341	0.003215883	-0.009968775	0.042932432	0.006396152	-0.012449333	0.02408931	0.028628962	0.006767704	0.023343338	0.026957348	0.00393405	0.027389865	0.020403253	0.023400908	0.02723451	0.023716722	0.022359816	0.038247295	0.023682745	-0.006634621	0.037959561	0.020440903	-0.008597084	0.007520249	0.062454205	0.034034036	-0.000449663	0.053876519	0.036597233	0.01504052	0.011135169	0.021356272	0.013876938	0.012157148	0.025824994
	153025	0.067776419	0.037361626	-0.027980944	0.071374536	0.03030532	-0.033492528	0.044853531	0.051563419	-0.011491133	0.045303944	0.042527653	-0.015505155	0.039885301	0.026651476	0.016395152	0.041277934	0.024582168	0.017456766	0.008643772	0.036246311	-0.007401095	0.00710206	0.028738827	-0.009735901	0.011384936	0.054868717	0.006761896	0.007580427	0.045707371	0.004656081	0.035072602	0.016079184	0.033027004	0.036657996	0.017367169	0.035997983
	153429	0.04372615	0.029696636	-0.00729611	0.043924324	0.024544504	-0.011660825	0.034903456	0.03256359	-0.010917018	0.033559311	0.024777796	-0.014702935	-0.006870723	0.015665552	0.039187845	-0.005423154	0.01639311	0.03911072	-0.005316317	0.00735728	-0.009267316	3.53E-06	0.004262585	-0.015353355	0.00096469	0.022071186	0.00432301	0.003668552	0.018298646	-0.002895542	-0.019148918	-0.002970255	0.011785324	-0.016408978	-0.00106889	0.009256858
	154431	0.037436668	0.015099948	-0.037507858	0.039017294	0.013748901	-0.049318504	0.02683763	0.033810414	-0.0045069	0.02490044	0.031630084	-0.010564858	0.02234799	0.042911284	0.019164545	0.02087776	0.037268974	0.021017808	0.04083889	0.040387053	-0.008745065	0.039012212	0.035509825	-0.013032376	0.021590205	0.062831379	0.030907828	0.016765885	0.055202704	0.031643212	-0.003406535	-0.027682632	-0.021079976	-0.000872809	-0.019038714	-0.037943501
	154734	0.034221757	0.020121589	0.020562381	0.03299563	0.023105325	0.020230982	0.029196646	0.024991903	0.016187401	0.028238053	0.026302066	0.014353753	0.030605011	0.018588658	0.019696446	0.029294126	0.021614183	0.02026148	0.060586113	0.024335464	0.028957685	0.056034032	0.030094046	0.027394855	0.060115237	0.035382662	0.032155123	0.055263788	0.038900919	0.031386774	0.032655071	0.027939538	0.03095541	0.029973609	0.029410567	0.032750543
	154835	0.026693782	0.027207173	0.003498873	0.025664562	0.024579072	0.001374159	0.024296409	0.036826357	0.010645518	0.02184749	0.033163492	0.008126264	0.007438588	0.02918794	0.029641466	0.006051042	0.026362421	0.03057706	0.03233622	0.025042867	0.014374351	0.030395156	0.025253909	0.012231301	0.03715859	0.04193994	0.013625353	0.034421634	0.039072555	0.011028463	0.018823333	0.035809577	0.039156236	0.016763011	0.033183694	0.04013326
	154936	0.037793878	0.047162991	-0.019112969	0.032542311	0.039142519	-0.025184158	0.018758398	0.046963762	-0.003136057	0.016318576	0.041238144	-0.009963099	0.003707521	0.017532973	0.023743408	0.001778511	0.021391036	0.022367865	0.019208411	0.049424212	-0.016929546	0.014756019	0.042903841	-0.023360752	0.016164538	0.055908471	0.004426991	0.012624969	0.047698963	-0.001514854	-0.004333303	0.003285602	0.042430744	-0.000601654	0.006248149	0.045445949
	155231	0.006846469	0.009468101	-0.004050998	0.007688625	0.007293313	-0.003533655	0.02775274	0.055585101	0.005573196	0.025275705	0.044868585	0.006893947	0.025887033	0.042389087	0.020748692	0.024541978	0.038626526	0.021065643	0.031390835	0.049530677	0.012045897	0.030142905	0.043642394	0.010911906	0.025748506	0.069976151	0.029205473	0.020712366	0.06129995	0.027120143	0.012794099	0.004452289	0.010705324	0.012849303	0.008336977	0.01051297
	155635	0.01415026	0.036708053	-0.0109137	0.01199237	0.029922551	-0.013538102	0.008828762	0.033091623	-0.00707757	0.006840924	0.028393434	-0.010073503	-0.002187152	0.009858659	0.01415118	-0.003106388	0.009250148	0.016026361	0.011573496	0.038333982	-0.01028469	0.011003244	0.030123299	-0.013382093	0.015010615	0.052121338	0.009012097	0.011309872	0.045435265	0.00654347	-0.003100166	-0.008489206	0.026467375	-0.004293452	-0.004942514	0.030109908
	156637	0.034075137	0.020862784	-0.003379851	0.035860427	0.017615786	-0.003990498	0.034205902	0.033779908	0.000888763	0.035179168	0.02667119	-0.000444549	0.029141337	0.027518127	0.009726887	0.028654026	0.024998143	0.008491469	0.020779366	0.009662871	-0.017025892	0.024460698	0.007720461	-0.018534798	0.02104019	0.035205591	-0.011184816	0.025199248	0.027623134	-0.013663486	0.004732158	0.034550592	0.006998509	0.006565039	0.025346976	0.007025598
	157336	0.032571469	0.021995256	-0.002796547	0.032501299	0.021133846	-0.005468701	0.015264701	0.033066869	0.007103406	0.013120523	0.030357487	0.002694236	0.009031075	0.015174459	0.022454912	0.008038893	0.016705468	0.0238203	0.03274392	0.026682237	-0.008250731	0.032212991	0.025915988	-0.011766043	0.015125284	0.037988495	0.016464382	0.012849611	0.034835421	0.01212578	0.000922877	0.007039167	0.025482398	0.00057447	0.00917111	0.026984872
	157437	0.013113446	0.000964859	0.000293215	0.018910632	0.004183718	-0.003354868	0.014194892	0.031033268	0.012371122	0.014014765	0.028003709	0.009741484	0.010980756	0.019970959	0.018580947	0.012373983	0.02036245	0.016163476	0.013450045	-0.000211368	0.002571986	0.018734382	0.003913882	8.70E-05	0.01216172	0.016369302	0.017151888	0.015907556	0.017398207	0.017586434	0.008646267	0.012120041	0.023661572	0.012696577	0.014700776	0.023757054
	158035	0.02806963	-0.003500131	-0.008437848	0.028795743	-0.000886776	-0.008653776	0.023175098	0.037920438	0.001996693	0.021243433	0.032507889	-0.000989779	0.010063707	0.039404664	0.028746448	0.009830465	0.034640025	0.028814388	0.043702789	0.026314186	-0.000334317	0.04395403	0.025514271	-0.003471781	0.034730863	0.068668336	0.023520468	0.032900825	0.059791595	0.020799099	0.009416942	0.01765305	0.022956612	0.009861568	0.01598455	0.024672648
	158136	-0.005813355	0.016270218	0.002673349	-0.002194894	0.011665817	0.002384423	0.001161293	0.01833719	0.007852263	0.004840714	0.013795137	0.007734796	0.011346339	0.022924574	0.021151466	0.013671636	0.020582858	0.021699404	0.021294087	0.030360566	0.007125708	0.023211032	0.024594694	0.004325916	0.031429019	0.041145533	0.016115934	0.033861119	0.035147063	0.014925179	0.017875655	0.010512675	0.015869828	0.021685624	0.010195154	0.017584033
	158540	0.025790652	0.006770147	0.005711998	0.02505845	0.007003584	0.005956178	0.023791697	0.018085798	0.018360991	0.023621077	0.018438617	0.018647259	0.016886398	0.006109396	0.02824918	0.019157359	0.008970613	0.029814374	0.036972813	0.002572097	0.012896102	0.037519567	0.005870803	0.012468981	0.02406426	0.026300712	0.022592423	0.022016333	0.024419757	0.023489324	0.007562072	0.0091513	0.026754148	0.009400109	0.010912623	0.028507283
	159138	0.020314755	0.044658862	-0.002427356	0.02143182	0.036133643	-0.005358857	0.009389644	0.062238976	0.010867133	0.008951984	0.049398482	0.007806975	0.000821996	0.004894896	0.018155551	-0.0042752	0.007953604	0.021362988	0.052186824	0.084193841	-0.002729634	0.051338091	0.071834691	-0.007194643	0.065709069	0.079619199	0.004234262	0.06298244	0.070775986	0.001001707	0.031367842	0.007293482	0.019419078	0.026875211	0.013530039	0.022663202
	159239	0.008026408	0.020530226	-0.002309812	0.009323838	0.015846623	-0.003022372	0.008104873	0.028021244	0.003622262	0.006229601	0.024933023	0.001119536	0.00180435	0.020676751	0.021808797	0.001036438	0.01847454	0.02238778	0.012357342	0.020613253	-0.001204478	0.00866624	0.019512465	-0.003191547	0.009759414	0.028450018	0.004258005	0.007854479	0.025154492	0.002649305	0.002799999	0.016685333	0.014223523	0.003663198	0.013615671	0.015493172
	159340	0.026485035	-0.014168079	-0.020634782	0.028243585	-0.014887951	-0.01780811	0.025778534	0.031830303	0.010847759	0.024447471	0.028585775	0.009407178	0.012637709	0.011149493	0.021388715	0.012072453	0.011823328	0.022511294	0.042464983	0.032983437	-0.009804083	0.041800007	0.030210597	-0.014377775	0.034606457	0.045148548	0.011555339	0.033730805	0.041407276	0.007500143	0.011717792	-0.013754576	-0.001917416	0.013875828	-0.012024065	0.000451701
	160123	0.035545293	0.00176436	-0.015497353	0.04055756	-0.001340984	-0.013679026	0.017233904	0.020247079	0.012013867	0.017692868	0.018717175	0.01090367	0.011002376	0.014564107	0.027591372	0.011252301	0.016026322	0.027436946	0.019053973	0.022120837	0.018382503	0.019288728	0.022198558	0.016204961	0.02015271	0.032770589	0.033439893	0.018355556	0.03468835	0.028917508	0.008745733	0.020979989	0.035010051	0.005862172	0.024561865	0.031981815
	161327	0.015499178	0.018879343	0.016101096	0.01361923	0.017280765	0.016629284	0.021357574	0.026817316	0.019216195	0.020111317	0.026635267	0.017223567	0.019165039	0.020948295	0.0243259	0.017723631	0.019460946	0.025946224	0.000205894	0.005591418	0.002889795	0.001063349	0.006615558	0.001773758	0.005122231	0.007062807	0.011756634	0.007154397	0.009907995	0.011359675	0.006059743	-0.001446089	0.015946385	0.007894556	0.001064284	0.017532786
	161630	0.030812189	0.027649157	-0.007733753	0.031350497	0.019922735	-0.00787012	0.020826576	0.043863367	0.005456565	0.020307524	0.035041656	0.004666745	0.014283211	0.023025721	0.0430163	0.01015743	0.026183669	0.044397291	0.015952302	0.023184903	-0.01764166	0.016007023	0.015632035	-0.018273326	0.02393868	0.046030816	0.009434098	0.023987539	0.03762785	0.008570836	0.008061534	0.002070858	0.028014332	0.006323637	0.008030091	0.027853996
	161731	0.014317638	0.000927293	-0.01709656	0.01593734	0.000565195	-0.021817584	0.01372054	0.032033756	0.013898091	0.01340868	0.029072911	0.010226653	0.006763688	0.02211157	0.030023634	0.006341835	0.021839829	0.029347155	0.019008188	0.015929073	-0.008216526	0.021240165	0.014162702	-0.013529933	0.02401825	0.064643271	0.031038882	0.022348335	0.058324691	0.027445337	0.002765612	0.021176023	0.038902521	0.002556471	0.022703271	0.038867466
	162026	0.026636602	-0.006988548	-0.023988409	0.029744036	-0.007066568	-0.025042299	0.026524158	0.007796005	-0.019307151	0.027606854	0.005585854	-0.02105784	0.014450686	0.009504586	0.014074044	0.013615312	0.010527103	0.015429007	0.029224277	-0.006966302	-0.027764706	0.032202061	-0.007196459	-0.027819704	0.038269486	0.020874891	-0.02676432	0.038415372	0.016639778	-0.030900706	0.008965757	0.003405026	0.016123118	0.008265255	0.005447932	0.018298442
	162228	0.031084068	0.042600114	-0.002445568	0.035290711	0.035226215	-0.00907275	0.019162383	0.039079994	0.007785271	0.021209871	0.034907743	0.000311104	-0.000415858	0.0062457	0.020116534	-0.001846844	0.010377103	0.020268787	0.028379206	0.050336964	-0.007974219	0.032157641	0.041056812	-0.016235702	0.020791717	0.045328297	0.009515462	0.023139341	0.040199269	0.000751018	-0.010091607	-0.011360203	0.027111895	-0.012626365	-0.004376597	0.028428128
	162329	0.020353755	0.018873475	0.011887324	0.02216549	0.017762879	0.012337561	0.02395566	0.027526675	0.019409757	0.024847364	0.026124753	0.019711798	0.018664639	0.024681259	0.022294607	0.019728122	0.023666747	0.023340195	0.022408918	0.020421909	0.017085893	0.024673296	0.019812794	0.017662615	0.029325917	0.02909293	0.023563771	0.03110349	0.028365375	0.024138486	0.016969113	0.017965473	0.026371893	0.019575534	0.018240659	0.028258078
	162733	0.014250168	0.015223655	-0.016687896	0.011803388	0.007855552	-0.012097362	0.011447957	0.021253206	-0.009236923	0.009329312	0.013739551	-0.00590146	0.009218154	-4.38E-05	-0.005213339	0.008610069	-0.00261649	-0.00112892	0.023669573	0.031969327	-0.004872122	0.022624899	0.022878436	-0.001847011	0.023823911	0.03424285	0.020637874	0.024428023	0.028595766	0.021858538	0.009467056	-0.000388981	0.031595167	0.011183076	0.002399491	0.035545956
	163129	0.04917182	0.001874486	-0.03655073	0.053291302	0.001486374	-0.039608315	0.041275747	0.027042309	-0.004612744	0.038419049	0.024029955	-0.00548749	0.018922295	0.017897116	0.013084156	0.017264426	0.017751236	0.014996137	0.045634679	0.018894846	-0.014492513	0.046919137	0.017537255	-0.016444506	0.026162373	0.054561075	0.03682844	0.019751916	0.049240187	0.038239542	-0.004033671	0.015270335	0.036917299	-0.010131807	0.015461153	0.044177026
	164030	0.027195882	0.04665412	-0.000824486	0.029466186	0.038793847	-0.005914921	0.010699033	0.031710804	0.003587586	0.011406355	0.027100286	-0.000410202	0.008994371	0.028516985	0.013826403	0.009291461	0.025475284	0.012046372	0.023415476	0.050762985	-0.000893912	0.022252191	0.043019284	-0.007895975	0.01706	0.047881503	0.001423751	0.017664984	0.040175375	-0.004078706	0.003503625	0.019476909	0.023499437	0.005241432	0.018016515	0.024450095
	164131	0.037786521	0.00858885	-0.019879142	0.037532166	0.010150051	-0.025040172	0.029389339	0.018597173	0.000819832	0.028969569	0.016952137	-0.00015436	-0.000266086	0.005325056	0.029463941	-0.000388248	0.004719696	0.036236353	0.040502492	0.028050438	-0.012300866	0.038422722	0.024948003	-0.015285713	0.002154934	0.041114002	0.00631911	0.000135252	0.034634925	0.001799425	0.003160401	0.012324498	0.035686862	0.002540006	0.013415896	0.039672129
	165032	0.020680353	0.013618486	0.007215563	0.025241133	0.009126456	0.009593588	0.005602882	0.027756583	0.034024026	0.010377515	0.023300791	0.038455307	0.032012165	0.021414289	0.032481756	0.034518246	0.021833085	0.034876548	0.031093419	0.023485404	0.037797075	0.035368886	0.023932192	0.039344907	0.019913485	0.040411916	0.073325373	0.02511408	0.041110035	0.078002989	0.047066335	0.026020091	0.059778217	0.048763912	0.032723136	0.059802171
	165840	-0.000280246	0.002008267	-0.004699226	-0.00469685	0.00503416	-0.009844986	0.021177564	0.026553789	0.022227816	0.01953825	0.025462104	0.020846266	0.018558286	0.011027804	0.010730848	0.014224043	0.014269321	0.007651422	0.03308437	0.01425855	0.016685612	0.029754363	0.013890905	0.017146602	0.0220557	0.028547853	0.031627189	0.020563718	0.024785997	0.03279537	0.0175028	0.008940581	0.019789202	0.015691957	0.007427979	0.024002898
	166438	0.020605464	0.018075446	-0.010634752	0.024868229	0.011777209	-0.011163088	0.021838261	0.051155049	0.018212223	0.021860279	0.044248633	0.013572203	0.01028132	0.018511984	0.038441375	0.010637253	0.021504156	0.037481282	0.022429744	0.034851965	0.004843657	0.026736127	0.026617831	0.002803858	0.024484344	0.059542447	0.031056421	0.022540454	0.052667283	0.025824001	0.013420857	0.024145192	0.049600206	0.012706066	0.027769677	0.049869545
	167036	0.043393768	0.026782261	-0.006434485	0.042339999	0.024180364	-0.009085248	0.017741973	0.031034276	0.01208258	0.014353914	0.028446848	0.010149126	-0.002526943	0.022743499	0.037953354	-0.004350863	0.020612167	0.04274255	0.038706928	0.03910381	-0.008613674	0.035683323	0.030661575	-0.010821193	0.045966022	0.066161901	0.009633236	0.039300777	0.056736007	0.006364396	-0.012072954	0.030390883	0.049701456	-0.016309978	0.025379037	0.05852934
	168341	0.039849371	0.029102184	0.01384498	0.042855784	0.025945295	0.012401178	0.021299094	0.029469721	0.009303211	0.023944516	0.026341869	0.007121443	0.015221227	0.026765641	0.020245988	0.017297853	0.02583774	0.019043842	0.034950711	0.026101157	0.024638239	0.034730136	0.025577424	0.026054112	0.031633265	0.0310943	0.028080732	0.034775026	0.030472826	0.027117057	0.026018338	0.020298064	0.024080046	0.027480828	0.020897996	0.024250718
	169343	0.018545549	0.016467776	-0.015727624	0.016424807	0.014306137	-0.019357562	0.017272424	0.036297575	0.001965506	0.014117471	0.032236483	-0.002116954	0.011990056	0.027651627	0.024403643	0.009296541	0.027394533	0.02298834	0.015641525	0.012825687	-0.026147019	0.014144335	0.009033264	-0.030327059	0.017791828	0.049281079	0.005162288	0.013777784	0.042561352	0.00076605	0.006871707	0.033327494	0.040294144	0.00340711	0.033603486	0.040373348
	169444	0.026807444	0.019134723	-0.028670825	0.031246928	0.012930524	-0.034186084	0.02161755	0.05177575	0.004980875	0.020978596	0.044772428	-0.001913281	0.008272007	0.050969154	0.034524374	0.006150771	0.047548272	0.032273114	0.036701456	0.010327482	-0.039382912	0.043520652	0.004694353	-0.046095237	0.029413303	0.068620868	0.007831002	0.02909505	0.059152689	-0.002151982	-0.001696693	0.03935891	0.043260507	-0.003731619	0.037661429	0.045081608
	170934	0.042709511	0.026640628	-0.015031455	0.045249388	0.024115086	-0.020368911	0.030431781	0.03741565	0.000351617	0.030633923	0.03514703	-0.003766617	0.01291055	0.031298731	0.038094588	0.009767175	0.033287231	0.037775148	0.03526888	0.019670201	-0.02034965	0.038329851	0.016672533	-0.023022609	0.023819147	0.045326822	0.009060216	0.020460954	0.04409042	0.004120344	0.010506215	0.018011862	0.038706079	0.007630685	0.022180043	0.040957727
	171633	0.012470996	0.028432185	-0.001556924	0.011262947	0.022488967	-0.00349407	0.01916784	0.036755379	0.006967487	0.015252667	0.033231448	0.004664457	0.007583488	0.023963975	0.013457965	0.004784236	0.021744292	0.013786661	0.020829652	0.040636774	0.00103268	0.016812244	0.03361867	-0.000369139	0.025723044	0.044803556	0.014942182	0.020144586	0.040360577	0.012643501	-0.004248451	0.008264349	0.026735935	-0.00640873	0.008253584	0.03022109
	172029	0.0278794	0.031553566	0.000309967	0.027695388	0.027031906	-0.002167896	0.022218795	0.041184869	0.010270704	0.020906292	0.034230553	0.007872012	0.015726043	0.026009705	0.01365908	0.014610028	0.023857441	0.013123797	0.028243445	0.051776264	-0.003626067	0.028248232	0.040067554	-0.005342179	0.035959367	0.060859747	0.006553146	0.034064587	0.049575463	0.003722846	0.009424428	0.001683536	0.01601138	0.0091077	0.003870766	0.018434567
	172130	0.062593304	0.027080435	-0.032067902	0.060714986	0.023970254	-0.038993858	0.044210069	0.051802266	0.016846256	0.041406658	0.047667429	0.010916736	0.011163095	0.032742646	0.055998813	0.008415454	0.033618629	0.056998108	0.06255798	0.030569898	-0.027401276	0.060448401	0.028202334	-0.034792859	0.038297206	0.073614083	0.050215557	0.034783263	0.069804952	0.043129172	-0.005359645	0.025957381	0.072584786	-0.006425636	0.027433461	0.077034123
	172332	0.01187002	0.002998198	-0.000488865	0.01442307	0.000790166	0.002884223	0.011454558	0.021625735	0.004672506	0.012228311	0.018882491	0.004014805	0.01754209	0.030903177	0.037007585	0.015546453	0.031410217	0.034225166	0.012836217	0.026116	0.015903596	0.011794682	0.023197038	0.01553079	0.013230919	0.044550955	0.015701	0.010435361	0.038883496	0.011428596	0.002736649	0.016927138	0.024571653	-0.000986711	0.016692678	0.025299754
	172534	0.043861486	0.034117628	0.001964906	0.045507152	0.029817509	0.001897231	0.031468369	0.030092042	0.006928857	0.031947963	0.027440634	0.006382314	0.028199652	0.026920917	0.013345868	0.028491624	0.025719846	0.013018442	0.045475055	0.037718169	0.005653217	0.046691373	0.033492278	0.006025951	0.039835483	0.040993072	0.012403254	0.039401606	0.03702287	0.012858325	0.040277932	0.0312846	0.018059963	0.041748013	0.029614761	0.020150095
	173334	0.050119035	0.014482282	0.004723668	0.051082149	0.014761798	0.005306194	0.046699807	0.041512866	0.022289906	0.047986027	0.039361905	0.020385182	0.024798322	0.020936262	0.028642431	0.025049845	0.019872595	0.031848747	0.031340875	0.007919638	-0.007468302	0.029631395	0.002888645	-0.002763736	0.002992007	0.02476225	0.025380809	0.001244127	0.018437957	0.031305913	0.029976862	0.015792757	0.030206822	0.030195264	0.015542285	0.036045093
	173435	0.049527962	0.021270756	-0.013702899	0.049512543	0.020092437	-0.016467178	0.023500094	0.03280941	-0.015467715	0.023120904	0.02726054	-0.019955125	-0.015837649	0.003654103	0.017497391	-0.015907358	0.003828041	0.017695516	0.038084518	0.010696045	-0.019149153	0.037644915	0.009785684	-0.019172704	0.021882406	0.02122567	-0.016010107	0.021175498	0.017556285	-0.018110143	-0.021829164	-0.01774393	0.019058855	-0.02113892	-0.013293858	0.023458263
	173536	0.038995434	0.020201132	-0.010561084	0.040209394	0.01854871	-0.011067183	0.023525966	0.039589796	0.006378141	0.022102607	0.035299927	0.003748415	0.01408316	0.028567934	0.020669103	0.013663504	0.026497243	0.020549947	0.041168608	0.020967409	-0.014001739	0.042766299	0.018833334	-0.015202067	0.040264349	0.052573986	0.008558466	0.040010292	0.047420181	0.005633754	0.023155006	0.021307204	0.017291961	0.024400728	0.020830777	0.019219611
	173940	0.027278852	0.036363691	0.00613089	0.01840771	0.03552942	0.000800438	0.01824663	0.037834525	0.005194283	0.012379354	0.035976101	-0.000713113	0.007183567	0.028517526	0.025863253	0.002270293	0.029472791	0.023066904	0.039539702	0.047428943	0.005372371	0.029548014	0.046093423	-0.001803392	0.014427262	0.043011878	0.00920542	0.010600613	0.040167537	0.003247432	-0.003819404	-0.00177771	0.022619471	-0.001839777	-0.00032053	0.02597197
	175035	0.033380799	0.031392924	0.018738346	0.033550523	0.028446728	0.020038133	0.029988658	0.058769204	0.047493674	0.028029433	0.052125998	0.048532087	0.024105705	0.060931999	0.055872861	0.022032665	0.053395204	0.058524065	0.031035367	0.016811421	-0.004545815	0.031049959	0.016553875	-0.005386263	0.037903946	0.042542689	0.032883603	0.034885563	0.041418102	0.033868134	0.022096794	-0.002824339	0.022735607	0.02157525	0.005427395	0.024211844
	175439	0.013769537	-0.000464125	-0.01822797	0.015061223	-0.002505701	-0.01681342	0.012020133	0.034244798	4.23E-05	0.011585573	0.026263116	-0.003015692	0.003171909	0.012767576	0.006336621	0.001402942	0.011988966	0.004035323	0.016489787	0.013534236	-0.021549538	0.01647743	0.008915526	-0.024110038	0.024380539	0.037183441	0.006605899	0.023134643	0.033058885	0.00345354	-0.005613696	0.008011381	-0.004318649	-0.007049895	0.008601967	-0.010072437
	177645	0.026112996	0.056360979	-0.003020971	0.024685109	0.049914688	-0.010324791	0.019513039	0.06423787	0.002660234	0.015638536	0.055824485	-0.004806099	0.004458855	0.030363923	0.043514177	0.003100474	0.030259198	0.046492722	0.025317118	0.071409076	-0.002198711	0.021963166	0.060044724	-0.009088102	0.006894778	0.053981256	0.003527973	0.004180113	0.046788119	-0.00356756	0.006131229	0.025383051	0.034280613	0.005955739	0.025873085	0.035515692
	177746	0.020179838	0.019322993	-0.007882569	0.020042716	0.016311353	-0.009450336	0.028429201	0.040893182	0.00336401	0.026228368	0.036790654	-0.000816023	0.020429257	0.030256137	0.023816351	0.019279525	0.029261252	0.024102423	0.026437398	0.023311118	-0.010108981	0.025876787	0.019146148	-0.011704824	0.040803842	0.069181971	0.010940406	0.036527079	0.061687145	0.00498534	0.015502904	0.016426161	0.018829875	0.014911455	0.016579716	0.019091321
	178849	0.022328805	0.010863433	-0.010114103	0.022295861	0.009128992	-0.014746364	0.023086734	0.017848389	-0.01506537	0.020612448	0.014067611	-0.01904342	-0.001577749	0.013150793	0.014696829	-0.003278365	0.009917172	0.01753117	0.024718769	0.015488236	-0.005621745	0.023521444	0.013821258	-0.010067435	0.031098593	0.04411279	-0.005289125	0.027983906	0.036463067	-0.010606769	-0.010195837	-0.002882085	0.021863906	-0.008771513	-0.003083908	0.027029673
	178950	0.017724844	0.008938546	-0.008974249	0.018163541	0.006441979	-0.006257424	0.023149272	0.019964973	0.000529276	0.021846022	0.018618166	0.003072269	0.019475646	0.029528491	0.03209902	0.019503044	0.027416782	0.032324944	0.027422143	0.020452462	0.001344747	0.02712211	0.017733172	0.005467332	0.038856074	0.046242658	0.012551479	0.037783369	0.041500382	0.012961159	0.01469231	0.013885573	0.032303564	0.015271242	0.014206241	0.038093828
	179346	0.016091648	0.032195967	-0.006214363	0.01505914	0.02577362	-0.006956253	0.013552905	0.042546093	-0.00023449	0.009589613	0.036430489	-0.003706268	0.010511682	0.026108356	0.017559819	0.009149234	0.024486495	0.018036144	0.005779128	0.030042775	-0.005425554	0.006769268	0.022403585	-0.004922834	0.010766917	0.050777547	0.001898888	0.009573095	0.040807717	0.000650832	-0.004864588	-0.027355537	0.023076348	-0.001578118	-0.018692128	0.026019473
	180129	-0.004224543	0.007365706	-0.001777836	-0.007041879	0.004944771	-0.001769308	-0.002404633	0.018784452	0.000268354	-0.004158439	0.014444025	-0.001473763	0.000417586	0.018963326	0.022259381	0.000647132	0.017021019	0.023368508	0.008015338	0.019714059	-0.007275449	0.005618421	0.01469081	-0.007386057	0.002074793	0.041185588	0.008598179	-0.001056511	0.034433205	0.005115432	-0.004457756	0.009155227	0.02260978	-0.004747021	0.00918541	0.025019947
	180432	0.01247759	0.02158981	0.001448285	0.011980525	0.017888546	-0.001668619	0.008984859	0.028132947	0.001748771	0.008122384	0.023330254	-0.004842699	0.001227944	0.031987902	0.037430845	-0.000405583	0.032018997	0.034971826	0.021369046	0.025570573	-0.005249383	0.021404333	0.019606838	-0.010089667	0.018945277	0.04048549	-1.64E-05	0.016817886	0.034338821	-0.010298472	0.004275521	0.041381042	0.053482655	0.000186376	0.04204293	0.052653987
	180836	0.055565942	0.042099636	0.0401542	0.057481501	0.04252908	0.040684946	0.039831642	0.042144433	0.034639634	0.040338952	0.041244503	0.033915441	0.022209466	0.030917833	0.046519328	0.02425083	0.032703947	0.047076665	0.067375444	0.058223207	0.041628744	0.067635678	0.056600124	0.041734081	0.069287241	0.072910264	0.05363502	0.068738706	0.069944687	0.053552527	0.0334494	0.03851166	0.05852985	0.036154486	0.040989406	0.06037312
	180937	0.02095869	0.029478159	0.016361851	0.025509441	0.026977636	0.013556849	0.014237707	0.023649413	0.01177697	0.017367711	0.021401282	0.011310156	0.011010487	0.007036112	0.004551662	0.010638005	0.006778763	0.005383149	0.02700194	0.016570859	0.000538427	0.026956812	0.013465299	0.001005197	0.026393825	0.036738563	0.015980398	0.026136158	0.031663645	0.01821899	0.007423915	0.01612561	0.013130432	0.006309756	0.013075661	0.01541166
	181232	0.032026388	0.032291416	-0.005035212	0.031974431	0.027318023	-0.007700239	0.018874761	0.036208205	-0.003000264	0.015798565	0.031424198	-0.007155749	0.007931506	0.022460021	0.026104508	0.006512345	0.023317367	0.02572608	0.031766701	0.03321366	-0.008503353	0.030872677	0.02752674	-0.012396572	0.028410463	0.058822326	0.002842704	0.024173623	0.051493641	-0.00292404	0.010791108	0.015808068	0.05025832	0.009926479	0.021344807	0.05368248
	182739	0.025608236	0.027287757	-0.007461984	0.029441601	0.021802468	-0.007935492	0.025004776	0.037434485	0.014147081	0.027881701	0.029190261	0.015502363	0.017705152	0.015660645	0.010619645	0.019951388	0.012703465	0.012871842	0.020290498	0.015527846	-0.012743364	0.024096914	0.011976829	-0.012481097	0.030932497	0.034971677	6.00E-05	0.035405349	0.029689768	-0.000404969	0.018306207	0.017861215	0.007900516	0.019739382	0.017891817	0.007150816
	183034	0.019594137	0.001233699	0.002448816	0.028632682	0.000420129	0.002739786	0.017600391	0.030329548	0.00732561	0.020788938	0.023239473	0.007336033	0.010048524	0.023505412	0.018363189	0.01358116	0.018950215	0.020003153	0.018947711	0.001669417	-0.001604076	0.027689368	-0.000239488	-0.000704759	0.029844908	0.043371528	0.017744455	0.035353661	0.033497974	0.019544899	0.012636459	0.018412473	0.022747265	0.016597021	0.013878516	0.026467081
	185139	0.017689433	0.001090571	-0.016206168	0.017177703	0.001199055	-0.017196095	0.016652428	0.024627477	0.006207654	0.015360353	0.022988064	0.00411984	0.013476261	0.024136592	0.026601652	0.011318988	0.024473473	0.025799347	0.023716498	0.032624152	-0.001115429	0.021445032	0.029387955	-0.003541887	0.013529395	0.045446787	0.02796476	0.010288225	0.040791493	0.027383897	0.011138762	0.023339953	0.041627143	0.009243747	0.024561021	0.040479131
	185442	0.033974938	0.048405603	-0.005136807	0.031214867	0.042813938	-0.009137879	0.008934877	0.044231512	0.009021242	0.005997101	0.037892722	0.007516352	-0.001120065	0.039056703	0.027443608	-0.003413837	0.034243245	0.028117416	0.046689339	0.04385218	-0.007660449	0.04339942	0.040473707	-0.011179005	0.009638415	0.066038169	0.035968248	0.002975263	0.058877785	0.036985666	-0.007352089	0.033927303	0.035562046	-0.010889993	0.03142409	0.036980268
	187547	0.012230734	-0.006587902	-0.022196786	0.014997828	-0.005311396	-0.025639988	0.012809397	0.024828002	0.000161118	0.012195258	0.022815831	-0.003676254	-0.000287708	0.008583448	0.039921004	-0.001362681	0.009710779	0.043281876	0.023636818	-0.001813716	-0.033081897	0.02632292	-0.000291036	-0.037779476	0.031790219	0.062860869	0.006327096	0.029508892	0.056621376	0.001810892	-0.000828654	0.017525125	0.053068072	-0.002649565	0.017622836	0.057237454
	187850	0.030166814	0.023564976	-0.014350317	0.033325709	0.020170022	-0.018777743	-0.019668218	0.052140985	0.007548227	-0.023912795	0.046252023	0.00111266	0.013933767	0.02898361	0.033093806	0.011520369	0.028370988	0.033123154	-0.020247295	0.021250376	-0.006657041	-0.021123752	0.018228551	-0.010735814	-0.0277892	0.031033261	0.000430249	-0.028673783	0.027134061	-0.004370013	0.02192362	0.028879171	0.053342164	0.023967979	0.02997165	0.056109022
	188347	0.021861613	0.023109546	0.013267061	0.022771271	0.021163715	0.01255024	0.017818796	0.028889349	0.01860467	0.017655516	0.026113093	0.018278949	0.016275477	0.027888045	0.022370383	0.01616782	0.024874292	0.02298072	0.028031409	0.032266781	0.018372472	0.029405762	0.029183447	0.017631238	0.036767133	0.052967284	0.034158945	0.035927817	0.048419181	0.033682209	0.018665131	0.029421838	0.036707956	0.019901277	0.026079224	0.038998034
	189349	0.043413829	0.046622064	0.0086615	0.044572338	0.040859036	0.007082602	0.027868642	0.05065266	0.00985554	0.027832916	0.043150805	0.008085518	0.009321783	0.034200765	0.031875767	0.009495202	0.030765487	0.033570234	0.038442705	0.046876907	0.0037668	0.040261257	0.039631963	0.002397184	0.030716931	0.059033331	0.011021699	0.029616181	0.050279837	0.008455916	-0.003430594	0.016657965	0.049689256	-0.001250398	0.017573016	0.053593073
	189450	0.040339328	0.020941645	0.00054306	0.042327501	0.019475	-0.001134205	0.035477158	0.048717547	0.014092141	0.035118319	0.041306321	0.011698696	-0.035032615	0.001803757	0.009176188	-0.035107184	-0.000166644	0.011553941	0.070531718	0.030913334	0.013785283	0.071987271	0.029380672	0.011250673	0.050987113	0.072744869	0.032582741	0.051492892	0.060581557	0.032159809	-0.028641909	0.009689179	0.010508982	-0.026370501	0.005311872	0.016589724
	190031	0.031391013	0.019949106	-0.011663136	0.032407451	0.0142499	-0.009090594	0.018275172	0.015394216	-0.003202112	0.018940758	0.010695954	-0.000473376	0.01527152	0.011448567	0.003100695	0.015881164	0.00821331	0.006147945	0.033765882	0.016704967	-0.015873926	0.035509471	0.008769752	-0.012573838	0.025348879	0.037330478	0.021956716	0.024715969	0.031124998	0.026649928	0.021879235	0.017599054	0.01415611	0.021032959	0.015814481	0.018743508
	191336	0.070887759	0.057234835	0.034766033	0.067359261	0.055839363	0.031623375	0.038892489	0.053131074	0.037715975	0.035843629	0.048940107	0.036783889	0.04385829	0.034468655	0.04529253	0.041231867	0.035741739	0.046704423	0.063607387	0.035364687	0.017724061	0.061025064	0.037336446	0.012997524	0.053521648	0.061263666	0.047983613	0.049427539	0.058007281	0.046292052	0.0335804	0.017334485	0.038871497	0.031678393	0.020353066	0.040916134
	191437	0.016034996	-0.01077041	-0.011296474	0.017792692	-0.010071267	-0.011505692	0.015495913	0.02085158	0.003350537	0.013541397	0.018241273	0.00097032	0.008932398	0.026413471	0.029464966	0.007287603	0.024710365	0.027386915	0.014315323	-0.002973057	-0.0088306	0.015445299	-0.000571537	-0.011484184	0.017526221	0.050845478	0.022233626	0.015309832	0.048726592	0.013712955	0.005710511	0.025737757	0.025440574	0.00562492	0.025513047	0.022394484
	192540	0.021183785	0.017788656	-0.008046694	0.023945982	0.010868873	-0.007229865	0.03606667	0.0460466	0.009681634	0.033613581	0.041203618	0.005740151	0.012302776	0.033167448	0.028038323	0.010393383	0.031095849	0.027209088	0.039043404	0.050237935	0.018987443	0.03523038	0.048054092	0.014678606	0.04734746	0.07125432	0.023502409	0.042430926	0.063841067	0.019091323	0.002832676	0.030213788	0.044351734	0.000960653	0.030545797	0.045567647
	192843	0.029187392	0.000108075	0.008192715	0.034593154	-0.003482759	0.008929289	0.013943694	0.045334961	0.013467078	0.013371946	0.035988301	0.011693671	0.014873766	0.051881488	0.053336281	0.013531012	0.044393331	0.056540057	0.027398121	-0.014579522	-0.011976846	0.032480307	-0.009018365	-0.016204363	0.028926069	0.027538447	0.002742762	0.030544957	0.026651412	-0.001914748	0.019785486	-3.51E-05	0.039653294	0.023124861	0.003772739	0.044489745
	193239	0.041880567	0.016885767	-0.008030361	0.040344443	0.018706808	-0.011484981	0.016408591	0.027148396	0.008818554	0.014805765	0.025451435	0.006238897	0.018154515	0.004508941	0.004345501	0.017847348	0.007038007	0.003079661	0.012748103	0.002950825	0.003076958	0.012290304	0.005441121	0.003935157	-0.004665726	0.017239686	0.015920117	-0.007062878	0.015948528	0.016108157	0.0004164	-0.00989326	-0.000835395	-0.001412126	-0.00431323	-0.002427832
	194140	0.031988703	0.008558496	-0.005079764	0.032954164	0.008594295	-0.004255032	0.035251021	0.012714324	0.001296025	0.034601867	0.013675936	0.000886042	0.004147817	0.017935256	0.022910092	0.005932049	0.018009735	0.021571709	0.014960798	0.012301346	-0.000689177	0.01441211	0.012336172	-0.000714825	0.029118275	0.032979753	0.026321599	0.029955041	0.032964151	0.023470614	0.0006466	0.018297272	0.032111436	0.003042084	0.018093856	0.031521853
	194645	0.051819619	0.020033786	-0.016797571	0.060326703	0.014891203	-0.013466153	0.023231806	0.021998057	8.44E-05	0.025411651	0.018934425	0.001162252	0.011957829	0.01737058	0.00647806	0.012927534	0.01420463	0.008006645	0.048777603	0.017587215	-0.010663697	0.056449264	0.015267828	-0.010537528	0.03735235	0.042074181	-0.002945058	0.039510086	0.034494083	-0.003151456	0.009882685	0.025983859	0.018274797	0.01204257	0.019967096	0.021643693
	194847	0.03176818	0.011044731	-0.006528032	0.030401621	0.009882845	-0.007689318	0.039963592	0.04734052	0.001856792	0.034725122	0.043350868	-0.003725553	0.012357713	0.031875439	0.030482193	0.009000159	0.029597109	0.032517787	0.018321801	0.022009842	-0.003782059	0.014605411	0.016973116	-0.003911878	0.019952687	0.039855156	0.011453162	0.014440096	0.03615658	0.008760558	0.002050932	0.022291251	0.025185259	0.000759658	0.019006781	0.028995726
	195041	0.014809198	0.021114474	-0.006748873	0.013928716	0.019465828	-0.009957611	0.007359383	0.017497517	-0.005803913	0.007022628	0.015912646	-0.008297145	0.012334972	0.00598988	0.019731712	0.013412419	0.00528882	0.022390265	0.02068465	0.022565024	-0.009289231	0.019572817	0.019285632	-0.011858471	0.024238985	0.036750905	0.012429625	0.021056198	0.032283057	0.01144971	0.004924318	0.01274191	0.02794278	0.003373965	0.010851868	0.030606819
	195849	0.036106206	0.07807143	0.000943403	0.037996396	0.063751072	-0.002014583	0.012900388	0.054035712	0.002041146	0.01208906	0.044673916	-0.002684428	-0.001041344	0.010191354	0.043651395	-0.00105441	0.012383235	0.048407409	0.02198978	0.069357447	-0.0021706	0.022640793	0.055471715	-0.00563101	0.010133014	0.046863727	-0.004494227	0.009366347	0.038715329	-0.010280524	-0.008798398	-0.012937424	0.037781131	-0.010351645	-0.007393502	0.044154037
	196144	-0.023793628	-0.031825904	-0.037463322	-0.026359964	-0.028815517	-0.039166458	0.028597744	0.04883109	0.032043681	0.026184814	0.046359703	0.028818285	0.012769927	0.026191771	0.02660799	0.011001642	0.026999939	0.024738597	0.011172238	0.012465872	0.00240238	0.00936747	0.013031078	0.001512181	0.015295812	0.038096193	0.027426595	0.013261043	0.037810445	0.025900254	-0.01239418	-0.004348749	0.000190938	-0.011701164	-0.002547454	0.000119884
	197348	0.006457336	0.017442344	-0.004699456	0.004028766	0.014138293	-0.005204654	0.011234035	0.019210886	0.008519324	0.010003379	0.017803697	0.005931466	-0.000715442	0.007632362	0.023027658	-0.002294284	0.010486011	0.021630868	-0.007303303	0.001747058	-0.014534566	-0.004984715	-0.005343442	-0.011359018	0.004409533	0.028196415	-0.000754791	0.003081382	0.020829519	-0.000743388	0.000166162	0.007002674	0.013198856	-0.001837593	0.00555358	0.017273664
	198855	0.01624947	0.019272059	-0.008197358	0.016000275	0.015546942	-0.011605011	0.007940589	0.030115224	0.001252511	0.003196545	0.027035337	-0.001386602	-0.003907053	0.002330346	0.020785676	-0.008004412	0.005100096	0.021746108	0.017530693	0.012168142	-0.014262927	0.017505379	0.008618205	-0.016659606	-0.004188773	0.025164003	0.008064832	-0.009080516	0.023207365	0.004876107	-0.003939017	-0.005960939	0.020329574	-0.003536564	-0.0039984	0.023758691
	199453	0.034005906	0.034214716	0.014701444	0.03758039	0.031431731	0.013931488	0.03863271	0.066030614	0.023102257	0.035129257	0.059947371	0.019891532	0.015484359	0.03452998	0.028133849	0.019013483	0.032428134	0.027227366	0.036676425	0.034931198	0.009775097	0.039975248	0.031872589	0.009175972	0.050483521	0.087705232	0.034073751	0.047643516	0.078827813	0.031042257	0.006716949	0.028272243	0.044528008	0.014010612	0.026211873	0.047211364
	199655	0.060680877	0.005388593	-0.017725309	0.065051593	0.007115609	-0.022485202	0.036955751	0.02762804	0.003958842	0.037552744	0.02591579	0.00028557	0.037909519	0.011157273	0.004606287	0.041125745	0.01250711	0.002106147	0.056590319	0.000809677	-0.021944696	0.061170347	0.002891461	-0.026548594	0.044026397	0.041454561	0.021138208	0.044794794	0.04002919	0.016735993	0.022905026	0.003536241	0.017127065	0.025507513	0.006486611	0.017990896
	199958	0.02898863	0.005129888	0.001256625	0.028304173	0.005844493	0.00249339	0.020737486	0.044082437	0.022944734	0.021319808	0.037809689	0.025718004	0.01512158	0.040035218	0.032843754	0.019228656	0.031964093	0.037016932	0.054764573	0.023470722	0.010778979	0.055979397	0.02248325	0.011772556	0.021083204	0.038271535	0.03680722	0.017344788	0.037743017	0.039653298	-0.003146238	0.037550244	0.043323606	-0.005389004	0.034287356	0.048856944
	200109	0.036123656	0.022736182	0.018333467	0.037405062	0.022151351	0.022452574	0.011921464	0.038223375	0.011488068	0.009108844	0.034457758	0.006794902	0.007710817	0.02919657	0.042361565	0.004798321	0.029374093	0.044693954	0.028397452	0.021752579	-0.003608362	0.031227931	0.017224209	-0.004235646	0.024710681	0.049772907	0.007795888	0.022289325	0.04315871	0.002475637	0.013207391	0.031664629	0.052642435	0.009127794	0.034224238	0.055019721
	200614	0.015203507	-0.017142076	-0.011306055	0.016142869	-0.011094594	-0.014238343	0.015059099	-0.029949892	-0.01208408	0.015942898	-0.020663356	-0.016155459	0.00878694	-0.026937615	-0.002425528	0.008953709	-0.017649885	-0.004078117	0.022763085	0.000553694	-0.008128199	0.021980532	0.003555911	-0.008373494	0.020460263	0.01860112	0.007487728	0.019257965	0.018816659	0.009555284	0.008678458	-0.020730609	-0.000673479	0.009065598	-0.012702477	-0.000612325
	201818	0.007871659	0.017339246	-0.015285787	0.006833705	0.013435412	-0.019725557	0.011305902	0.025886726	0.009458762	0.012550369	0.022793956	0.008659417	0.010176623	0.02214271	0.025364673	0.009941436	0.021914551	0.025626237	0.010496127	0.03670238	0.003916993	0.01031213	0.029987922	0.002530058	0.019461315	0.051390316	0.021344643	0.019136125	0.045750115	0.019769918	0.008360942	0.023073448	0.020758074	0.006097126	0.022568561	0.019028947
	203418	0.033986989	0.021119712	0.011428642	0.033708002	0.020438299	0.010754287	0.022307863	0.020308264	0.012763678	0.022188593	0.019711347	0.010074856	0.005767677	0.008971385	0.033914756	0.005969706	0.01116001	0.035991885	0.02499225	0.018854076	-0.002610437	0.025394417	0.01733114	-0.005761337	0.028244188	0.031773943	0.016531175	0.025374429	0.031671949	0.010771871	-0.004076805	0.008718614	0.038103331	-0.003762671	0.011149523	0.039850958
	204016	0.014728329	0.005617346	-0.004284426	0.017767405	0.003465263	-0.002059064	0.016216669	0.030156748	0.011979965	0.01704533	0.024648204	0.012653943	0.002533113	-0.012706091	0.020699792	0.001806561	-0.008552666	0.025862209	0.022870611	0.035591461	-0.000930528	0.023364501	0.025405142	-0.001374414	0.023668885	0.041597776	0.015167977	0.023202904	0.034166422	0.016450511	-0.001475672	-0.012046671	0.025095152	-0.002308594	-0.008371067	0.028530383
	204521	0.017185172	0.029606206	-0.002171443	0.017854687	0.022956651	-0.005397077	0.024772286	0.0274501	0.025037523	0.024201354	0.026066676	0.026482265	0.022503709	0.029438844	0.034237295	0.023017792	0.028538899	0.036353093	0.012805413	0.024641464	0.001051657	0.013086265	0.020310368	-0.001295619	0.019146567	0.034425419	0.031561978	0.019850761	0.030966107	0.033163823	0.012517449	0.017804597	0.029544359	0.013769582	0.017530294	0.031480879
	205119	0.002633955	0.017388441	-0.012090183	0.007047675	0.012750268	-0.010221368	0.030609304	0.025323372	0.005685999	0.032595966	0.022237554	0.007458784	0.019323548	0.014020436	-0.00079541	0.022196913	0.014040064	-0.000615872	0.029080518	0.012728331	-0.015824143	0.035324458	0.010300022	-0.014996252	0.012935013	0.019826263	-0.003740374	0.017288797	0.017260313	-0.001315049	0.00674943	0.014748235	0.001823424	0.010196243	0.013794599	0.004317574
	205725	0.020335488	-0.003390378	-0.011734954	0.026697475	-0.003995429	-0.00990333	0.031728353	0.044184458	0.017660163	0.033473775	0.040273968	0.014909425	0.023959415	0.042249039	0.029862212	0.024972182	0.038985446	0.029644875	0.01171542	-0.014790576	-0.033415228	0.018767467	-0.014612346	-0.032802388	0.033284437	0.062731266	0.027425498	0.031578992	0.057784978	0.022681469	0.006307957	0.019100605	0.012817461	0.006115269	0.017684212	0.014621225
	208226	0.047601849	0.026329886	0.011224248	0.047298405	0.026998123	0.009225419	0.04510206	0.044104602	0.013106199	0.042864613	0.041726764	0.008828788	0.033466771	0.048648499	0.035679981	0.030997766	0.047153726	0.032861535	0.04072364	0.000562592	-0.016458597	0.040189993	0.002453048	-0.019068215	0.057802182	0.093323648	0.032860853	0.050317969	0.083496019	0.028190523	-0.026981117	0.012743613	0.025296733	-0.027603606	0.009255689	0.028584493
	208327	0.023436816	0.033091072	-0.007754514	0.020126395	0.028826462	-0.011944763	0.010570973	0.034989636	0.016067997	0.007651183	0.032544222	0.012957078	-0.000554106	0.010933282	0.033472173	-0.001790783	0.012839762	0.035995677	0.020767573	0.021815026	-0.011419903	0.018387876	0.019530473	-0.015552123	0.01395211	0.052202709	0.014930213	0.009334202	0.04913098	0.00827455	-0.002913409	0.010507443	0.035462491	-0.002532488	0.011903035	0.03783223
	210011	0.034903854	0.044487432	-0.020783164	0.032448627	0.036334839	-0.026653396	0.022592852	0.052575566	-0.006371072	0.018801946	0.047234312	-0.015894359	-0.007068386	0.00593161	0.017472973	-0.0079562	0.008924318	0.013994003	0.034218658	0.046033584	-0.013823597	0.032915771	0.038860254	-0.020270752	0.029924871	0.062350448	0.00023002	0.025699958	0.057437215	-0.009994435	-0.012811892	-0.023076899	0.035109568	-0.011339978	-0.014282312	0.038251676
	210415	0.013940405	-0.006757393	-0.010811778	0.015680593	-0.002140481	-0.014366297	0.017395776	0.033255655	0.019051643	0.016150109	0.030435035	0.018950336	0.012106482	-0.002087559	0.017708695	0.012835331	0.00548471	0.015926158	0.009881183	0.002440591	0.006280006	0.011216923	0.005563729	0.005458809	0.020942742	0.044332713	0.03050244	0.019789586	0.039467309	0.033288695	0.010250951	0.030228116	0.036284141	0.009537504	0.027473465	0.040489018
	210617	0.026894698	0.020020152	-0.021221444	0.028703477	0.012608754	-0.024820872	0.024737315	0.044816844	0.014896061	0.023244338	0.039132956	0.011353609	0.006554367	0.015777715	0.03089986	0.005775773	0.016426088	0.031500064	0.033548675	0.043157194	-0.014945866	0.03475368	0.033261802	-0.020585088	0.035559051	0.07219705	0.000955873	0.032515887	0.060993969	-0.007086612	0.015555711	0.032308728	0.022752957	0.014678102	0.029020729	0.019920142
	211215	0.027279476	0.002153569	-0.004357617	0.027700599	0.00177637	-0.00236877	0.030945614	0.021804562	0.007878602	0.031030105	0.019953711	0.008497544	0.017181365	-0.005718895	0.005875747	0.018484976	-0.005125374	0.009227399	0.028194275	0.008163295	-0.003978131	0.028518705	0.006472935	-0.002890574	0.037774567	0.037146654	0.012022118	0.037250869	0.033656891	0.011133677	0.01712073	-0.011259336	8.56E-05	0.018864667	-0.011829196	0.004632589
	211316	-0.037407313	-0.004733482	-0.000204239	-0.033754122	-0.011425326	0.012536742	-0.007450715	0.023939878	0.00974756	-0.006068245	0.015960684	0.01542234	0.020799285	0.019906333	0.02654778	0.020727729	0.019606791	0.026071137	0.016178077	0.009343129	0.00304924	0.01928843	0.006960436	0.006951593	-0.007796211	0.00739851	0.017533604	-0.004527217	0.002158992	0.02835549	-0.006785417	-0.007172851	0.025271814	-0.005364907	-0.005980654	0.033465791
	211417	0.006671977	0.011145734	-0.002131594	0.003697349	0.009988094	-0.001617311	0.010995704	0.027913032	0.007540192	0.009112339	0.025293751	0.004973294	0.006211168	0.014345522	0.023297777	0.004668434	0.015315097	0.023526488	0.000221442	0.017173206	0.003053349	-0.001363707	0.016424133	-0.001177289	0.013712076	0.039269883	0.01375019	0.011391061	0.037634	0.006639282	0.002495043	-0.008552974	0.025744235	0.002415569	-0.003950322	0.02772424
	211922	0.023711484	0.034946147	0.005114364	0.022705818	0.033009082	0.001390685	0.03789353	0.057046007	0.013915754	0.033035696	0.051322103	0.011620535	0.024714977	0.039445307	0.037856944	0.022368718	0.03965136	0.036405139	0.029369442	0.045962397	0.012298014	0.024439907	0.041873261	0.012260064	0.042654898	0.061844252	0.028864644	0.035117939	0.057017308	0.028452771	0.009228225	0.008594702	0.040196244	0.01137508	0.013313394	0.041025445
	212116	0.023855058	0.024896834	0.007196932	0.021979067	0.021948811	0.008197251	-0.01822868	0.057338774	0.032008871	-0.023838565	0.048097406	0.033263016	-0.023952752	0.035403017	0.042583086	-0.027375598	0.030790549	0.045819204	0.010203603	0.036471892	0.001324816	0.006806032	0.031175466	-0.0010926	-0.024785995	0.059763853	0.038289849	-0.02988237	0.049754266	0.040907498	-0.024762886	0.037867967	0.038753074	-0.027093004	0.029056313	0.045847312
	212217	0.010060432	0.027911192	-0.005742157	0.008431172	0.021197064	-0.008105699	0.009497521	0.032343008	0.009854177	0.006151545	0.027404767	0.008208298	-0.00086716	0.007441205	0.026425168	-0.003313717	0.007705644	0.029721387	0.021707352	0.032340694	-0.002095852	0.019256046	0.027840301	-0.004278277	0.013470779	0.039642312	0.002736014	0.009858154	0.033875689	-0.0007786	0.006064302	0.006439995	0.025583586	0.003484792	0.006892271	0.029157881
	212318	0.003543806	0.018531395	-0.012836926	0.003417201	0.011618976	-0.013971217	-0.001227897	0.03017332	-0.002873129	-0.00261593	0.022123659	-0.004898923	-0.0043774	0.00136879	0.012366578	-0.004173131	0.001071607	0.014523991	0.011155172	0.01182161	0.000962294	0.011617162	0.011697982	-0.000507391	-0.007379296	0.023867805	0.011282206	-0.00884719	0.023594374	0.007406416	-0.005715196	-0.006314512	0.016357716	-0.004735482	-0.001568184	0.016739022
	212419	0.049104709	0.063856013	0.018444045	0.050366741	0.056585625	0.015429574	0.03522823	0.066453226	0.015322708	0.033003617	0.059728991	0.008614251	0.019817516	0.037428483	0.036158688	0.02048062	0.036312602	0.035758518	0.03912906	0.076156735	0.024466727	0.037337825	0.068693623	0.019287616	0.035965554	0.07554172	0.019648885	0.032554567	0.067996621	0.012099825	0.027903393	0.037205432	0.03772993	0.029339263	0.036841512	0.036584239
	214019	0.015963143	0.004406374	-0.003753093	0.01451078	0.004913444	-0.004060337	0.010349657	0.034243491	0.008086524	0.007481303	0.030589381	0.003402425	-0.001834802	0.008620473	0.018442268	-0.000831652	0.009748672	0.018166231	0.016923187	0.016507164	-0.002795045	0.013684082	0.015231977	-0.004142611	0.013969323	0.04533508	0.010738275	0.009826098	0.039926376	0.006302189	0.006114071	0.007166936	0.019365571	0.004525874	0.004658865	0.022416491
	214423	0.020050613	0.013773547	-0.001527033	0.021696076	0.009561417	-0.002668528	0.014805363	0.038208742	0.02574582	0.013426912	0.033970296	0.026147695	0.015261835	0.042972527	0.042256437	0.012318399	0.040813774	0.043980595	0.020296594	-0.006515746	-0.011283761	0.024731066	-0.008699429	-0.012650152	0.027362011	0.02011111	0.016425386	0.030624658	0.016786048	0.017099207	0.024915267	0.023881152	0.036868125	0.026418395	0.023496211	0.039414342
	217429	0.009082287	-0.005017106	-0.010893533	0.012490688	-0.004647127	-0.011123845	0.013256443	0.00853995	-0.002734119	0.016217526	0.007654726	-0.00363492	0.005409207	0.011621728	0.014899842	0.007234173	0.011384168	0.015814375	0.013515485	0.004421194	-0.003522641	0.016821435	0.004081806	-0.003829235	0.014925886	0.010721732	0.00789907	0.017301803	0.011008477	0.008571551	0.004460769	0.015645519	0.026320131	0.004800219	0.015290649	0.028905259
	221319	0.018271724	-0.005940621	-0.008799293	0.018491779	-0.005034565	-0.006706077	0.016341386	0.010349909	-0.005301793	0.015167056	0.009436293	-0.004457597	0.019002624	0.022127831	0.008285153	0.01732563	0.02041449	0.00838452	0.013622724	0.031732313	0.004411659	0.012891346	0.024807086	0.00493327	0.008875578	0.051943235	0.012170317	0.006743982	0.043707859	0.008309431	0.000402132	0.01303824	0.015256291	0.000358404	0.010735262	0.018230945
	224022	0.055882197	0.048277993	0.026108289	0.05709048	0.045042537	0.024845602	0.031049099	0.035056535	0.025330368	0.030612005	0.033417225	0.024318434	0.020094035	0.015780605	0.025612889	0.019779958	0.016478442	0.027994819	0.067824036	0.057777286	0.034848753	0.069340281	0.053599097	0.034978066	0.039300345	0.044792585	0.039267056	0.039119966	0.04272766	0.038993657	0.03350389	0.039729044	0.048642751	0.033047795	0.038411669	0.051354006
	231928	0.047908697	0.014982201	-0.019151948	0.05446548	0.010624908	-0.02242774	0.042930264	0.0276819	-0.005742332	0.043567047	0.022078335	-0.006826642	0.024873642	0.011589191	0.024660951	0.027980253	0.013037631	0.025010666	0.051692858	0.018286124	-0.023540223	0.058025904	0.012165222	-0.027245818	0.046382528	0.043105766	0.000224392	0.044469748	0.034777548	-0.000130641	0.016795669	0.018726273	0.036721408	0.015006312	0.021893196	0.036986399
	239944	0.015786218	0.017368486	0.010300497	0.014608042	0.017931039	0.008264435	0.004108649	0.037446074	0.012129879	0.001486427	0.033220634	0.008814742	0.002421746	0.011082178	0.021738002	0.001498214	0.012408142	0.022225998	0.022689449	0.030982533	0.008872524	0.022818405	0.027032437	0.008405268	0.017902391	0.052622773	0.022113692	0.015540687	0.04727691	0.020275477	0.014743345	0.020649945	0.030954573	0.0141443	0.022141708	0.032508709
	245333	0.012729612	0.02536308	-0.00556176	0.009503342	0.020237945	-0.005339254	0.008226693	0.028919498	-0.002068002	0.005700616	0.022377608	-0.002464611	0.000911093	0.006955749	0.018220207	0.000670925	0.007327328	0.018273545	0.024546303	0.026109027	-0.013905183	0.026365368	0.023154017	-0.020447941	0.014697421	0.041170113	0.000968709	0.01356429	0.035164315	-0.003444456	0.005593254	0.006112152	0.024665285	0.00738583	0.009649782	0.022864219
	250427	0.034386057	0.032953657	-0.005582834	0.032839999	0.028105479	-0.007760074	0.0011889	0.042829674	0.00751532	-0.002195198	0.033389188	0.005885775	0.004286014	0.015260511	0.021347756	0.003260341	0.016754793	0.020165689	0.023942901	0.020524109	0.001834359	0.023666603	0.019578034	-0.000988191	0.003509782	0.047090575	0.010931416	-0.000376729	0.038722951	0.007925613	0.01296239	0.008038177	0.013274848	0.012657623	0.011106674	0.012998668
	250932	0.031117994	0.060484327	-0.001712818	0.02680116	0.049565513	-0.006299889	0.016776633	0.054581929	0.009265728	0.013481032	0.043211266	0.006193253	0.013439663	0.024525596	0.023485532	0.011880146	0.023863072	0.021687707	0.03321613	0.060801249	-0.010728501	0.028461844	0.047598694	-0.014699448	0.018667907	0.067111097	0.028727546	0.015397091	0.056401804	0.023760773	-0.01188565	-0.000251067	0.035902373	-0.010090426	0.003011838	0.03641678
	251833	0.025838556	0.023159212	0.002899521	0.027409138	0.021451825	0.001170787	0.024605699	0.034820735	0.012101661	0.022639412	0.032004993	0.00936642	0.021925012	0.018581768	0.02213615	0.021988692	0.019670326	0.022118004	0.025456581	0.029178508	0.001128045	0.02522341	0.025619894	-0.001248987	0.019395687	0.037488759	0.018527698	0.017523766	0.033580348	0.017057126	0.016281983	0.00858621	0.020977721	0.018315248	0.009954732	0.023037346
	255639	0.017724568	0.020782018	-0.014076324	0.01892307	0.016711311	-0.017006174	0.015536916	0.037736397	0.004461083	0.014466054	0.034988496	-0.00063559	0.013643021	0.027041242	0.020979578	0.013091045	0.026317066	0.020525144	0.029589184	0.048034519	0.006485735	0.02731254	0.043570936	0.002550695	0.023566103	0.059250209	0.026589433	0.018443413	0.054876208	0.022726415	0.004159066	0.024893058	0.019680146	0.001328376	0.025972476	0.01794507
	256540	0.039013956	0.007385783	-0.018164158	0.038474735	0.006854774	-0.021096803	0.024053935	0.02099465	-0.010321306	0.023066357	0.018518398	-0.013702684	0.003322352	0.002931596	0.007768861	0.004331235	0.002927248	0.009446796	0.041972604	0.013142133	-0.019919377	0.041467629	0.011391778	-0.022529947	0.032369688	0.04276133	-0.002690513	0.02999031	0.039089743	-0.007824157	-0.012459989	0.004977331	0.021636892	-0.013563969	0.004848882	0.024953095
	268850	0.042676695	0.051525868	0.018751267	0.037833989	0.049500506	0.015972719	0.030715674	0.046279684	0.024912626	0.026543815	0.045951553	0.021329226	0.006840233	0.014938658	0.024738055	0.006221477	0.016564354	0.024906775	0.0379388	0.056314375	0.024118254	0.031202853	0.055102937	0.020214885	0.056232885	0.072830908	0.041823484	0.054822832	0.06983649	0.037062027	0.039200831	0.039333515	0.042410474	0.039472006	0.040133063	0.042017214
	280739	0.014728489	0.028059265	-0.012790571	0.013225275	0.021462858	-0.014117333	0.014512661	0.041482348	0.014602066	0.014464533	0.036811661	0.012153743	0.00824465	0.002554519	0.023439711	0.012335532	0.004537802	0.023777489	0.015470662	0.032384213	-0.018374018	0.011584094	0.025849186	-0.020201264	0.020927606	0.052752584	0.012517945	0.014184673	0.04775665	0.009912658	0.000921256	0.00325707	0.027223144	-0.001022628	0.006641325	0.029470932
	285345	0.032925103	0.014480459	-0.015539045	0.035728842	0.011131505	-0.017173283	0.018625431	0.043224625	0.020005019	0.016670816	0.037258539	0.016028615	0.003020275	0.016457474	0.037057728	0.002007431	0.017121496	0.037649915	0.035179559	0.044302832	0.016223572	0.032722473	0.035695598	0.016615352	0.020391868	0.07380899	0.036023479	0.015820917	0.063557349	0.031776294	-0.004725241	0.013116718	0.04118555	-0.005329672	0.01524717	0.044307888
	285446	0.035073187	-0.016665135	7.17E-05	0.038101654	-0.010939176	0.002018244	0.003460541	0.037961021	0.015933288	-0.000160911	0.031446464	0.016216967	-0.003469868	0.033362202	0.031038463	-0.005171211	0.02859471	0.031875283	0.020559574	0.038200989	0.002691765	0.018138122	0.033011746	0.00075502	0.006667266	0.054796547	0.015602179	0.003057736	0.045085926	0.01467899	-0.000219443	0.010654753	0.029452575	0.001127018	0.011101102	0.031107372
	289555	0.034846753	0.003029389	-0.010835042	0.035799924	0.003197112	-0.012287767	0.016060377	0.032250248	-0.008562918	0.011304402	0.028755113	-0.013825666	-0.010894869	-0.000379575	0.015700478	-0.011454734	0.000483569	0.017062562	0.018607831	0.028636716	-0.009427841	0.015350061	0.022802508	-0.012389024	0.01193098	0.038914416	-0.007221147	0.006245752	0.033261109	-0.012694574	-0.004004007	0.00833888	0.00903787	-0.005079643	0.007318836	0.007551044
	290136	0.022922652	0.026388129	-0.017216185	0.022178309	0.021959584	-0.020068394	0.019202618	0.041298661	0.008761021	0.017784586	0.037810121	0.005142681	0.002194318	0.024528649	0.031020911	0.000731338	0.024727834	0.032660335	0.034045026	0.042916525	0.005466673	0.031885806	0.039296806	0.002498335	0.027846066	0.052139223	0.00817911	0.025878064	0.047417015	0.003976066	0.004393397	0.009606984	0.035234258	0.005126992	0.013975587	0.036792949
	298051	-0.010020943	0.02468968	-0.064502224	-0.004599697	0.010861987	-0.082357533	0.007189416	0.015777141	-0.030345948	0.00795254	0.010496149	-0.041013818	0.011086579	-0.001250687	0.025127141	0.009464039	0.003335942	0.027290814	-0.00036317	0.036794826	-0.011131914	-0.002473003	0.030585699	-0.018069493	0.018520327	0.024584355	0.018397834	0.015847918	0.025509136	0.01672921	0.005141271	0.034599468	-0.016836427	0.005512616	0.027182247	-0.026070572
	303119	0.027714118	0.006322246	-0.002491485	0.02751334	0.005002346	-0.004890307	0.031523909	0.030132458	-0.002316276	0.029361429	0.024542358	-0.006252356	0.012306999	0.026720366	0.02800644	0.00817424	0.025788726	0.029528283	0.002096872	0.00215566	-0.003251554	0.001510806	0.000936006	-0.005079226	0.007512231	0.009273275	-0.00252983	0.006303578	0.006799645	-0.005182847	0.011383978	0.009694988	0.013395599	0.011679137	0.00806586	0.011165082
	304020	0.032686356	0.017632745	0.006488537	0.032997146	0.017855059	0.004296751	0.033277325	0.040324748	0.025215533	0.033863872	0.037778113	0.023686264	0.025251305	0.023781691	0.023792274	0.026333805	0.024209898	0.021662673	0.024916874	0.041151449	0.019609829	0.025016775	0.038429823	0.018197255	0.01836588	0.041377887	0.029190497	0.017953821	0.038059916	0.029654957	0.016368778	0.028205363	0.024771856	0.01633436	0.027788404	0.024679173
	307127	0.032939412	-0.001961453	-0.010253724	0.034075283	-0.000261423	-0.011122976	0.017994713	0.022295851	-0.003890131	0.017437574	0.018668149	-0.005220093	0.011666231	0.011813437	0.015522012	0.012217838	0.012870865	0.016402334	0.038156167	0.013960264	-0.011225014	0.03981683	0.011981938	-0.011512981	0.018746847	0.0341237	-0.001747044	0.0186473	0.028322557	-0.003050264	-0.008497756	-0.001869153	0.039536063	-0.006805991	0.004654067	0.042097349
	334635	0.040757503	0.02346093	0.010716995	0.039594155	0.023447288	0.012018666	0.045359302	0.032320186	0.01617296	0.043632261	0.031992815	0.017232154	0.043031625	0.031351816	0.021508366	0.041466244	0.031379156	0.023322226	0.038924951	0.023173984	0.011748822	0.038114946	0.02257633	0.013936463	0.043662094	0.027971122	0.014268741	0.042359665	0.027664391	0.016103629	0.039794873	0.020894065	0.015810255	0.038364634	0.022375634	0.017470077
	339847	0.026855512	0.031344112	-0.003358405	0.023361739	0.027107274	-0.007613679	0.000528284	0.008274215	0.004695325	0.000163181	0.003739836	0.009452787	-0.010130359	-0.012113233	0.010882825	-0.00906564	-0.012502624	0.01856944	0.035168923	0.042717282	-0.016039098	0.02908198	0.037635334	-0.02465573	0.025719924	0.046332467	-0.006802632	0.021487238	0.039900836	-0.014645956	-0.007326119	-0.007834106	0.018936729	-0.005994061	-0.008263037	0.027440615
	361941	0.036190081	0.017645802	-0.033768173	0.037827916	0.016439294	-0.044470571	0.001259756	0.023959456	0.06146327	0.000702805	0.024985414	0.068639062	0.000624985	0.003168329	0.06070295	0.000970782	0.007909515	0.0714854	0.026502913	0.017359251	-0.059444938	0.028391691	0.012826558	-0.073605061	0.024615118	0.046296757	-0.021334089	0.024115233	0.037961967	-0.031337854	-0.007860293	0.02901209	0.047427204	-0.011205615	0.024495976	0.055553269
	365343	0.023237167	0.007644505	-0.012275784	0.023560472	0.00747381	-0.010666668	0.01954834	0.047738954	0.000390848	0.014734109	0.042654682	-0.004394079	0.005198689	0.042018965	0.010295788	0.002812399	0.037621755	0.008542191	0.00683652	0.004726644	-0.006997968	0.006400117	0.005269141	-0.009601907	0.015367386	0.044215035	0.000551081	0.010858873	0.039575424	-0.005485953	-0.015655607	0.000710658	0.029030042	-0.011898721	0.001768182	0.034824133
	366042	0.011886718	0.013560322	-0.001987481	0.015536724	0.011631054	-0.000648449	0.007197261	0.036242489	0.017767746	0.005644938	0.033264037	0.016265828	0.003693429	0.026470019	0.019146379	0.003828866	0.024462273	0.019477442	0.016244626	0.020421475	-0.000710785	0.021296943	0.017162366	0.001782597	0.018573038	0.059984118	0.032865576	0.015720168	0.056294359	0.029733451	-0.001178832	0.026390754	0.030854167	-0.001092871	0.025146049	0.0314392
	371843	0.004689765	0.018124361	-0.013596392	0.003718425	0.011873733	-0.013001822	0.005881384	0.021294866	0.007695827	0.00475244	0.018512741	0.008085057	0.007164008	0.014849432	0.025417741	0.006480056	0.015652781	0.027549528	0.012579067	0.016604634	-0.004212762	0.011510559	0.015857391	-0.010002488	0.019955123	0.029877359	0.010723935	0.021047337	0.029727727	0.005241293	0.012427222	0.003908087	0.036489081	0.012727423	0.009308981	0.039899476
	377451	0.022128303	0.005198071	-0.040739946	0.023163501	0.004082034	-0.045092314	0.01073265	0.045796316	0.021977076	0.010409631	0.040059745	0.019381072	0.013775974	0.027349824	0.031562135	0.012963688	0.028318074	0.02957321	0.03084778	0.029365463	-0.014056937	0.032293662	0.024648143	-0.016846765	0.003927156	0.04776654	0.063348882	0.003576916	0.042855885	0.064683035	0.014258658	0.003852938	0.05313516	0.014094161	0.009826914	0.056156803
	380036	0.032966934	0.049471244	0.003533864	0.031889129	0.042596534	-9.89E-05	0.034381252	0.052395351	0.023533726	0.031367902	0.046665393	0.022799466	0.019816795	0.029701253	0.03809407	0.0180551	0.029491588	0.041136727	0.038932025	0.02414502	-0.010337456	0.037528694	0.020797351	-0.011236566	0.038117375	0.067975096	0.021574592	0.035759676	0.05966923	0.018700538	0.012737152	0.02524727	0.032642819	0.012244564	0.024236416	0.035362072
	385450	0.054782651	0.044638373	0.010853625	0.057040848	0.036001995	0.008221728	0.040975865	0.046440858	0.017901659	0.042128097	0.038456954	0.014816714	0.014296884	0.019212451	0.037753381	0.017050898	0.016473256	0.041775391	0.05078138	0.050963845	0.002108449	0.051539782	0.043723628	-0.004792623	0.047506869	0.047334246	0.022382107	0.046516877	0.041829314	0.01904125	-0.008344178	0.00019796	0.033882722	-0.007821798	-6.96E-05	0.040545247
	386250	0.034513287	0.02908664	0.012850341	0.032393094	0.027544834	0.014362755	0.017503979	0.0472432	0.019047093	0.014518658	0.041984688	0.018451309	0.005047441	0.038409874	0.030948153	0.003454888	0.034086533	0.032215182	0.033909991	0.016343359	0.003908325	0.033214048	0.01724392	0.005508573	0.032439545	0.045461029	0.016854227	0.029894216	0.040917926	0.018010512	0.011789653	0.037453305	0.039770391	0.011194558	0.034084354	0.044233177
	390645	0.041718092	0.013369742	0.015338356	0.04591056	0.014110715	0.015547886	0.040080264	0.035620011	0.032955375	0.042194277	0.035336044	0.031879969	0.008244322	0.024351887	0.029711716	0.00674622	0.024110438	0.031649191	0.045613907	0.014724282	0.010861744	0.050645862	0.01616475	0.007832141	0.04098624	0.051080815	0.051234398	0.042516608	0.049375176	0.050307829	-0.013873353	0.009437154	0.021152027	-0.015406752	0.011960993	0.02220878
	395958	0.025723955	0.01263049	0.013831467	0.02738055	0.009485058	0.018933022	0.020374363	0.013443348	0.015017889	0.021179944	0.009761002	0.020692822	0.019475183	0.00619894	0.022521386	0.019785231	0.007493821	0.02668996	0.049438056	0.032363754	0.0250137	0.050499644	0.033060338	0.024491711	0.056103148	0.032180637	0.032445386	0.057380073	0.034990951	0.032380465	0.006420963	-0.008069048	0.015641732	0.007655037	-0.010332651	0.025479008
	397154	0.052416958	0.041226614	-0.01361236	0.045405477	0.037631217	-0.018579168	0.030426437	0.039806634	-0.013039178	0.025131905	0.035867225	-0.019704504	-0.017040214	-0.023086613	0.023572819	-0.012656881	-0.019557919	0.029008985	0.041915659	0.053517967	-0.003574993	0.035549134	0.048834365	-0.009770565	0.030167451	0.053759731	-0.005072428	0.024803702	0.048342586	-0.012954906	-0.020901456	-0.012494924	0.033001486	-0.017461151	-0.009257934	0.037818722
	397760	0.023638278	0.025704617	-0.004824102	0.0245087	0.020647278	-0.006527197	0.022614911	0.041381948	0.005241731	0.021675315	0.035598516	0.001536781	0.009055582	0.027282771	0.026741812	0.009410359	0.02567162	0.027857292	0.025610525	0.022046093	-0.012654831	0.026239933	0.017722638	-0.014152567	0.02733363	0.036829904	0.000358704	0.026605031	0.032486293	-0.002216572	0.001948882	0.00474862	0.018972252	0.002372535	0.00552549	0.021855487
	397861	0.04201765	0.021433363	0.009841959	0.043409809	0.019028144	0.009472464	0.034824073	0.013473516	0.005517736	0.036503527	0.011579356	0.005356571	0.027353425	0.011670833	0.010000719	0.028848652	0.009874829	0.011204227	0.04811392	0.008490798	0.004535275	0.051824879	0.008486058	0.005543788	0.059822079	0.029286781	0.008578612	0.063505456	0.024999037	0.009480492	0.030647883	0.036232706	0.022340208	0.032116242	0.030025389	0.023298357
	412528	0.040841855	0.027325556	-0.006826975	0.042022746	0.024222072	-0.006653544	0.008413554	0.027933465	0.012572369	0.007287996	0.02551554	0.010205194	0.00704813	0.022565564	0.027022412	0.006498378	0.022029597	0.026989283	0.038011663	0.041030474	-0.010624681	0.038607582	0.034060493	-0.012692228	0.010603524	0.043522611	0.020622399	0.010065298	0.039690521	0.01639834	-0.005014491	0.01916326	0.057274509	-0.004701	0.020094071	0.059315052
	414229	0.100557432	0.059277527	0.010901649	0.100284241	0.056831162	0.007738265	0.046953276	0.066847198	0.02621034	0.045045257	0.06137329	0.022327652	0.055373728	0.038934246	0.013248435	0.05533484	0.0366701	0.012501833	0.069150992	0.071078099	0.026490647	0.067734092	0.066402555	0.022783287	0.047031373	0.074158184	0.036571901	0.044878226	0.068714008	0.033267826	0.048058785	0.043048229	0.023542222	0.048039224	0.040775191	0.023598587
	415837	0.019574355	-0.023081202	-0.038283072	0.020796388	-0.02132985	-0.041775074	0.012384036	0.016630733	-0.003018564	0.011364722	0.016730903	-0.008886729	0.028140021	0.038969621	0.042701509	0.024977202	0.042947598	0.038377538	0.032011878	-0.003179374	-0.024651093	0.03131571	0.000586783	-0.03072736	0.02744602	0.02647722	0.009451075	0.02303282	0.032606069	-0.0004121	0.021465579	0.022604596	0.027561633	0.016933292	0.028425876	0.024111759
	422632	0.023731673	0.02464981	-0.01040104	0.027292997	0.016688092	-0.007143558	0.00907572	0.025349235	0.004673366	0.008001149	0.018999478	0.004434382	-0.016431035	-0.005517617	0.017496647	-0.021399593	-0.003285189	0.016320456	0.026792232	0.032337245	-0.012513035	0.030078406	0.022045979	-0.009394647	0.027383264	0.035557974	0.00248732	0.027420282	0.026225828	0.004668125	0.031754579	0.008999127	0.020719033	0.03101239	0.010446321	0.022667415
	436239	0.030710381	0.033023074	-0.012197287	0.028446114	0.029929383	-0.017524593	0.020794438	0.032227721	-0.009869973	0.016299091	0.029613294	-0.017497865	0.012567204	0.024885776	0.030398579	0.009643754	0.023983363	0.031220971	0.022655694	0.02283936	-0.010263497	0.018514838	0.023003111	-0.015682481	0.025533605	0.041541465	-0.007366585	0.021103861	0.039083257	-0.015801758	-0.000666104	0.003058333	0.024543725	0.000342005	0.002850284	0.029815136
	436845	0.014844106	0.006608686	-0.013829603	0.020340065	0.002532858	-0.014258658	0.00947609	0.017029461	0.011833959	0.010939762	0.015134743	0.011929396	0.006102153	0.019038247	0.024318822	0.005633851	0.018831259	0.024691463	0.025472581	0.022891998	0.006289915	0.030366069	0.019435545	0.003470095	0.028811309	0.034000743	0.022093002	0.031518422	0.03262936	0.019751363	0.003197753	0.019993542	0.043983676	-0.00028982	0.023551809	0.043980278
	445543	0.046131417	0.028384019	-0.000296302	0.043455098	0.026464028	-7.35E-05	0.024847083	0.047017924	0.024502546	0.020310014	0.043100197	0.022765724	0.011342772	0.023143668	0.042915523	0.009794268	0.024960738	0.043587226	0.027657485	0.020154541	-0.001615373	0.027836492	0.017668542	-0.001050789	0.036156815	0.049171809	0.016685138	0.032408878	0.043352772	0.016789475	0.00404807	0.015487428	0.0508192	0.003031514	0.019156441	0.0519935
	448347	0.032066599	0.019319512	0.003608747	0.03208204	0.017753404	0.003051863	0.01431098	0.018116996	0.026596241	0.013205525	0.019486466	0.026356427	0.012114642	0.01631592	0.024592565	0.010958445	0.016647765	0.025572319	0.038739409	0.013111131	-0.003869215	0.038337097	0.013304702	-0.004925043	0.018940594	0.023337411	0.033475868	0.016772917	0.024761757	0.033953868	0.015866116	0.019371701	0.04084589	0.013083857	0.023283383	0.043752778
	479762	0.025591427	0.021385254	0.009513506	0.028435502	0.01966898	0.009329041	0.011509809	0.026344271	0.020539669	0.011358543	0.023162317	0.021361174	0.012754066	0.020796267	0.026743259	0.013700615	0.020009099	0.027816541	0.030487897	0.027663365	0.010300376	0.032879055	0.024219828	0.010611102	0.020995859	0.045725234	0.028975068	0.020000579	0.039372038	0.030010322	0.018085003	0.023058334	0.027201191	0.01902193	0.021740368	0.02969747
	480141	0.026571283	0.02627418	0.00498932	0.027809536	0.023854118	0.005300275	0.014728367	0.013997104	0.007130169	0.015257521	0.013786609	0.007696181	0.009591947	0.005708735	0.009117561	0.009616635	0.006871335	0.010652397	0.036405075	0.035119537	0.01236488	0.037467353	0.033049632	0.013148208	0.023895945	0.045370769	0.021047844	0.024955409	0.041338757	0.019586906	0.010465796	0.016837073	0.050569281	0.008801954	0.0207256	0.056741912
	485757	0.047903091	0.022374881	0.001746573	0.048568927	0.022148935	0.001537247	0.016249252	0.041700326	0.020036105	0.014413306	0.038454428	0.016962953	-0.000389226	0.041280475	0.025008082	-0.00310298	0.03882391	0.021739207	0.047321253	0.011973723	0.010974844	0.049773578	0.013836157	0.012640121	0.029252568	0.043562122	0.03270841	0.032084379	0.040503532	0.032781526	0.001788065	0.019579312	0.024444355	0.002672236	0.018763287	0.025492303
	486759	0.048363566	0.015117988	0.005914832	0.04856737	0.017190801	0.003752474	0.034764398	0.02489493	0.001304971	0.034151059	0.023556206	-0.0025561	0.024303861	0.009237411	0.013826743	0.024933795	0.010971503	0.014013856	0.043348227	0.025697121	0.005302631	0.042347748	0.024775827	0.002563031	0.03725088	0.042056877	0.008745923	0.035597015	0.037813645	0.004379823	0.017038414	0.02257796	0.028039964	0.017450672	0.022357469	0.028388279
	497865	0.028394666	0.018975552	0.001676343	0.035661127	0.015170333	0.000746969	0.006199615	0.038368657	0.014340053	0.00925695	0.033248294	0.010817616	-0.000834606	0.020359926	0.020585313	0.000601077	0.018337626	0.019704929	0.030297467	0.02988321	-0.004834366	0.037266124	0.024993746	-0.007292712	0.012006396	0.046603549	0.021695176	0.017031865	0.040161766	0.018563014	0.005362135	0.014813941	0.029997051	0.008496412	0.013984212	0.03274649
	499566	0.009327523	-0.011041546	-0.002256701	0.0123711	-0.009109915	-0.001649891	-5.99E-05	0.008544387	0.016248472	0.00048456	0.008735315	0.016159328	-0.003746545	-0.005640711	0.016813485	-0.002001959	-0.002932254	0.01785735	0.012212781	-0.005450228	0.00445529	0.015958408	-0.00335157	0.005401701	0.011000691	0.031601034	0.030954771	0.010785646	0.029528478	0.03080466	-0.001274981	-0.009241725	0.02096102	0.001763888	-0.005006375	0.022314036
	500222	0.023489283	0.041003451	0.021424679	0.026460925	0.03729286	0.022287268	-0.001148047	0.033275612	0.003103243	0.001928638	0.027483948	0.000744891	0.004877977	0.018937025	0.027540226	0.007307869	0.018123358	0.03036309	0.014893209	0.041067421	0.010320982	0.019325729	0.03539658	0.008923972	0.015970381	0.045788229	0.014220634	0.018691717	0.039148569	0.012997654	0.014035359	0.023604386	0.040286392	0.015939437	0.022915294	0.044185013
	510326	0.03190688	0.038102984	0.017842218	0.038769644	0.035486739	0.017273553	0.020581482	0.027532695	0.017727753	0.024643291	0.027501157	0.015491432	0.014108703	0.028606959	0.034043703	0.019724652	0.027965222	0.035416681	-0.001457411	0.004812216	0.003112413	0.00077815	0.003638592	0.00463995	-0.000768902	0.008245547	0.005784117	0.000655171	0.007338477	0.006703152	-0.010191905	0.003005519	0.017994497	-0.007175804	0.002131825	0.023212116
	522434	0.037756704	0.04080224	-6.52E-05	0.040079709	0.036437556	-0.005616174	0.036322415	0.047056396	0.007263027	0.036920588	0.042842299	0.001290991	0.028161092	0.027704189	0.018577892	0.028642876	0.027626742	0.015980303	0.045135893	0.052706532	0.004689992	0.046579335	0.04702162	-0.000898923	0.048479617	0.068306267	0.012592014	0.048726924	0.061925713	0.005075008	0.022831189	0.028226012	0.042737432	0.021032434	0.031936154	0.042973902
	530635	-0.011938222	0.009285086	-0.041589547	-0.007787399	0.002987362	-0.037512604	0.00040099	0.015271858	-0.025813038	0.004466236	0.010310932	-0.024707995	-0.000921841	0.011475662	0.002875353	0.000804029	0.011119731	0.002256167	0.025375864	0.0240368	-0.018385598	0.028893279	0.018181343	-0.020120051	0.033273328	0.014190846	0.028321369	0.031502623	0.01513981	0.024248507	0.018323908	0.010366512	0.013053992	0.019737633	0.012202386	0.010733122
	531536	0.021280112	0.031181844	-0.000928613	0.022242632	0.022808637	-0.002161893	0.004154961	0.033950433	0.001275228	0.001255269	0.027306968	-0.003558326	-0.011430158	-0.0005431	0.010238701	-0.013940699	0.001398717	0.008440454	0.001873485	0.023360476	0.000446602	-0.000888613	0.018293424	-0.002266046	0.016375493	0.041748721	0.01091294	0.012921103	0.036058713	0.006378972	0.005822766	-0.010106599	0.036857896	0.00494346	-0.001997273	0.040070225
	540436	0.047390454	0.046350867	0.025419313	0.048569776	0.042119414	0.024029689	0.009432653	0.009338515	0.012694191	0.012438176	0.009688597	0.013272388	-0.001747842	-0.01133738	0.012364844	0.001524248	-0.008464149	0.01570758	0.03447061	0.036439367	0.023862686	0.037875853	0.033368949	0.023505874	0.028085504	0.02705241	0.029096108	0.031760242	0.026221439	0.02958064	0.009047132	0.007837275	0.026979232	0.012188461	0.008698253	0.030693293
	541943	0.039949387	-0.005867018	-0.011270554	0.040397383	-0.005555442	-0.007252903	0.035412457	0.014299816	-0.003968927	0.034005851	0.011261482	-0.000731229	0.026846614	0.0074603	0.002512046	0.026403932	0.006346502	0.005475131	0.045076951	-0.011331352	-0.016042691	0.046799742	-0.010058651	-0.0139313	0.045951381	0.008366263	-0.00427582	0.045611944	0.006787791	-5.07E-05	0.019198721	-0.01200834	0.003924032	0.0208712	-0.010464894	0.008806759
	545345	0.051890217	0.009846861	-0.011144833	0.052916557	0.009884225	-0.013709391	0.02421551	0.029160447	0.000401692	0.022701047	0.024937952	-0.002670387	0.020612763	0.014206685	0.010523636	0.021073904	0.013614899	0.010131311	0.070486419	0.0033997	-0.026520588	0.072572634	0.003937613	-0.031974841	0.033035651	0.064340465	0.014686724	0.028094387	0.055134848	0.010179305	-0.02583834	0.011012935	0.032205433	-0.028382208	0.012273921	0.034662191
	547046	0.033210665	0.025342606	0.021369733	0.032589477	0.028013449	0.019494353	0.026576409	0.021684209	0.021929318	0.026604235	0.023862062	0.021285638	0.018985994	0.014961425	0.020310577	0.019165544	0.016880322	0.02062811	0.037124261	0.031843856	0.030158252	0.037008658	0.034662098	0.028809851	0.044127572	0.039984148	0.041693382	0.044504818	0.043213174	0.041902117	0.028371304	0.024676779	0.036607545	0.029830037	0.027962707	0.037732098
	559053	0.024810495	0.034019411	0.013117644	0.025757188	0.030573569	0.011979436	0.021002291	0.052666437	0.029112544	0.020016246	0.046839245	0.027766149	0.017630048	0.032846745	0.029838776	0.017311921	0.031618003	0.029685447	0.030360809	0.058794059	0.029789969	0.030498289	0.051957104	0.028322823	0.027423343	0.062311269	0.044171046	0.025405532	0.056738645	0.042511392	0.016211051	0.039518502	0.037571821	0.016039168	0.037845641	0.036875565
	562446	0.030624164	0.038489848	0.000851232	0.028328765	0.035713896	-0.004418315	0.015265257	0.045375705	-0.005482605	0.011319031	0.03981059	-0.013068497	0.002667173	0.026869915	0.040706929	0.0020696	0.026494058	0.039906546	0.027865602	0.041110829	-0.007184887	0.025146747	0.036558997	-0.01239719	0.023007862	0.069123529	0.003329666	0.017389555	0.060517006	-0.004114806	4.70E-05	-0.004525461	0.036737286	0.000430163	-0.000750292	0.042093739
	565452	0.020968191	0.030375563	-0.02079712	0.021847947	0.024828497	-0.025194971	0.008357567	0.03913945	-0.002392011	0.008324465	0.03251005	-0.005774082	-0.003299379	0.01256281	0.020098906	-0.004165787	0.013409543	0.020769525	0.005270212	0.012094193	-0.004572603	0.003158653	0.009716871	-0.005908542	0.014982895	0.023277888	0.018795548	0.013966832	0.021685895	0.018167598	-0.005607455	0.006216419	0.029481407	-0.006915638	0.006361283	0.034439318
	566454	0.016570289	0.015519423	0.006091514	0.015109066	0.01376891	0.004657049	0.019132728	0.028050644	0.015712306	0.019550806	0.025765972	0.011770058	0.000649716	0.017098239	0.044558454	-5.00E-05	0.019940902	0.043256212	0.029921886	0.037745293	0.004888032	0.030013235	0.033468019	-0.000327314	0.033277307	0.042154007	0.024055371	0.034636486	0.039057791	0.019729502	0.003132479	0.00393294	0.027312733	0.003496694	0.007059857	0.028297273
	567052	0.062927812	0.043651946	0.02010208	0.060429905	0.04647309	0.012779265	0.010633217	0.052146904	0.006999863	0.006225464	0.043264691	0.003682147	0.010798401	0.02823649	0.025350852	0.010821092	0.026797788	0.025315313	0.020042669	0.021075215	-0.013926789	0.018394982	0.016849564	-0.015988428	0.026710421	0.036285765	0.003980594	0.023215968	0.032544173	0.000669088	0.019873798	0.019163696	0.028471097	0.02047009	0.022316096	0.028320421
	567961	0.026406042	0.048450965	0.001520556	0.026193146	0.039932355	0.001401941	0.01469708	0.041259687	-0.007064177	0.013622223	0.033614807	-0.011540893	0.010752329	0.037636574	0.036657769	0.009709609	0.036600579	0.036502093	0.020529879	0.036817245	-0.006214418	0.020246506	0.030781092	-0.009244764	0.018337872	0.055747721	0.004878223	0.01640488	0.047942035	0.000835727	0.003003652	0.02746575	0.033472445	0.002409449	0.027514111	0.032856546
	568963	0.022060709	-0.018328188	-0.024426688	0.02689087	-0.016324976	-0.026484376	0.016425947	0.029756248	-0.014294314	0.012829235	0.026274933	-0.021736629	-0.001270434	0.026520852	0.025803208	-0.00475458	0.027186241	0.023489187	0.033734303	-0.005204733	-0.023099741	0.038181487	-0.005113743	-0.025925098	0.027413774	0.051951513	-0.010973268	0.023054343	0.045522973	-0.020889394	-0.008516454	0.017405614	0.031521618	-0.008729614	0.018181691	0.033954844
	570243	0.021907309	0.014597531	-0.016394423	0.022505233	0.009967294	-0.016192595	0.011329566	0.023001518	-0.008213855	0.010360817	0.020825159	-0.015184063	0.004344893	0.014734119	0.01744212	0.003424976	0.016396917	0.014534696	0.027126687	0.026531536	-0.020599242	0.025613884	0.019869892	-0.023989294	0.021012982	0.033051666	-0.015956651	0.019773381	0.027206069	-0.023831524	-0.001460809	0.000646216	0.027340939	-0.001815526	0.004012101	0.029563084
	571548	0.0149376	0.002746823	-0.000557081	0.011048438	0.004805813	0.001761807	0.021747977	0.01200423	0.005174099	0.017208263	0.014824428	0.006456878	0.020091495	0.015908271	0.017145595	0.017384386	0.018254392	0.018453807	-0.019446379	0.001111658	-0.002101213	-0.014039266	-0.004181373	-0.004419375	9.90E-05	0.030239785	0.010429542	0.00648002	0.022975689	0.003915942	-0.000511078	0.005883784	0.01378123	0.002047957	0.002786015	0.011843015
	573249	0.045732234	0.018926181	-0.015488245	0.046150323	0.017726548	-0.017159332	0.019494338	0.041619744	0.011667545	0.017490841	0.036291771	0.009047398	-0.007313133	0.001248565	0.016009832	-0.008046062	0.000336139	0.020081546	0.035690054	0.02348141	-0.011486019	0.034946933	0.020605076	-0.012754632	0.03523327	0.055312917	0.004984254	0.033410821	0.046490714	0.002782476	-0.006123699	-0.010653823	0.003705553	-0.005537954	-0.009194328	0.006811649
	573451	0.020908993	-0.001008106	-0.007042881	0.024150759	-0.00036853	-0.007315697	0.011556229	0.027725192	-0.001985796	0.010001585	0.02470641	-0.005797046	-0.000413539	0.018385023	0.024128277	0.001012917	0.016156742	0.027496006	0.002412664	0.000937268	-0.010270132	0.003879867	-0.000877338	-0.009095052	0.013876304	0.038480759	-0.002898234	0.010756224	0.033220675	-0.004836378	0.004946844	-0.001683469	0.034862127	0.009548608	-0.00021155	0.041756403
	580044	0.048148494	0.021401525	0.021255659	0.051491044	0.020051403	0.0253563	0.039776798	0.009496558	0.012542429	0.044481356	0.007595876	0.01771537	0.009371843	0.005462927	0.018421164	0.014651799	0.003212637	0.024509072	0.042599007	0.020205803	0.022792105	0.046059478	0.018871589	0.026636908	0.03557957	0.01914807	0.023417348	0.040681243	0.016187243	0.028897621	0.025517408	0.029784083	0.04950653	0.030929107	0.026418779	0.058229052
	580347	0.021279072	-0.000801708	-0.007375437	0.022254094	0.002645948	-0.009790305	0.007370565	0.027250193	0.022645025	0.006892764	0.023947863	0.023990132	-0.001392851	0.016308062	0.022576615	-0.002232892	0.012977983	0.025743047	0.034893412	0.004755277	0.005124065	0.033853225	0.008745176	0.004475831	0.0444276	0.026520239	0.030878879	0.042421557	0.030185329	0.030666951	0.012468089	0.007149721	0.015225898	0.013169799	0.006879042	0.01851826
	581349	0.045523908	0.033476494	0.037146222	0.049839076	0.03488769	0.037413895	0.041568916	0.036366012	0.036318682	0.04459272	0.0365857	0.037158627	0.031984109	0.024426665	0.029329287	0.03505348	0.025949236	0.02927972	0.046059188	0.03343188	0.036487572	0.050893925	0.036782283	0.033983894	0.047742415	0.039410703	0.041683301	0.052406047	0.042061158	0.039597098	0.050012559	0.041987039	0.050345656	0.054827228	0.04304466	0.051619653
	583858	0.007173315	0.019136515	-0.014672719	0.00748641	0.013362437	-0.01647046	0.006992883	0.029312944	-0.001693811	0.007983092	0.023456579	-0.005200735	-0.010955042	0.014783002	0.019450324	-0.012095269	0.01401402	0.021226436	0.044643961	0.033524554	-0.02762864	0.04553787	0.026120016	-0.032661103	0.044152141	0.043472029	-0.011824159	0.042823959	0.034925584	-0.01660875	0.026023287	0.02378536	0.012975165	0.022468433	0.022816291	0.015896017
	586460	0.029280549	-0.003916816	-0.006107941	0.030879784	-0.001775412	-0.00606064	0.015289563	0.048444606	0.014771462	0.010602851	0.042947635	0.011101509	0.00393791	0.041563999	0.028594941	0.001433493	0.036921564	0.026698656	0.022624163	0.019618768	-0.012581795	0.021274768	0.017433157	-0.015683945	0.009639741	0.058081098	0.020807557	0.004171155	0.051233985	0.016515071	0.003729205	0.027058553	0.02851763	0.001615036	0.026205888	0.02753037
	594156	0.067207962	0.0392153	-0.025821971	0.069110841	0.031212794	-0.028640348	0.009585907	0.038027517	-0.009203755	0.007262995	0.028425314	-0.011552674	-0.002960864	0.020077059	0.045261092	-0.003911649	0.024533803	0.042778231	0.004120911	0.020656522	-0.027410643	0.00416034	0.008475223	-0.024340911	0.014425656	0.046609256	-0.004083317	0.012900145	0.036194041	-0.006956491	0.005794111	0.053875141	0.029312145	0.001740726	0.047690913	0.027349032
	598568	0.037223276	0.030599386	0.006224388	0.039273709	0.030826241	0.002791926	0.020797461	0.023107436	0.00363345	0.020944685	0.024197159	-0.001052435	0.036426909	0.023619764	0.006743981	0.039238434	0.026965288	0.001883052	0.049720131	0.034441683	0.010153434	0.053646237	0.033804931	0.008942239	0.049070686	0.033069454	0.00860122	0.05306359	0.0351419	0.003912292	0.033409081	0.028484063	0.033786327	0.036422379	0.032453645	0.032103132
	599469	0.01316951	0.018992113	0.019901838	0.015748033	0.020733109	0.021473324	-0.002743755	0.022760784	0.021799939	-0.0037474	0.019578706	0.025862187	0.010339268	0.017516581	0.027128238	0.009795189	0.020074926	0.030444391	0.011817105	0.015044545	0.003355215	0.012512619	0.014543577	0.003762373	0.015336782	0.023412498	0.037360922	0.018592441	0.026329855	0.040748183	0.00320902	0.017256549	0.02630686	0.005167864	0.018631434	0.028945718
	613538	0.036876533	0.032539003	0.020786406	0.041576184	0.028175263	0.021619055	0.027967561	0.026008788	0.013940983	0.031690653	0.022590943	0.013654659	0.030051908	0.025333779	0.020266837	0.034133714	0.023015274	0.021107677	0.040377367	0.037420571	0.021322044	0.045160592	0.032024123	0.021634294	0.042571232	0.041259628	0.025738694	0.047150608	0.036018968	0.02500624	0.036741436	0.028046919	0.024132246	0.04096796	0.026429622	0.024777828
	622236	0.023194151	0.038558852	-0.002440208	0.018976297	0.032718934	-0.006447464	0.017328499	0.034503292	-0.00224634	0.015011245	0.029068759	-0.007508641	0.007214217	0.018583173	0.018309332	0.005130514	0.018812226	0.017553445	0.019102098	0.027777296	-0.001405452	0.017203564	0.024393102	-0.004372672	0.0183376	0.056731705	-0.000653225	0.014206754	0.048197564	-0.007370607	0.009983599	0.005639908	0.026011702	0.013046548	0.006057227	0.030788869
	623844	0.029727936	0.022277782	-0.000441305	0.029341049	0.020033984	-0.007361314	0.006794749	0.007004875	0.008532658	0.006593619	0.010522038	0.000588603	0.001362714	0.001951179	0.018443532	-0.000703449	0.000882993	0.02243245	0.01528974	0.006128128	0.004619792	0.016374374	0.010051293	-0.004475595	0.00567582	0.004922452	0.018772364	0.00525586	0.011777831	0.009618424	-0.019276805	-0.023070714	0.01886932	-0.017833557	-0.01991076	0.026801933
	627549	0.036606502	0.027564941	-0.005738926	0.037697978	0.024663718	-0.006594095	0.014308261	0.026037121	0.00290823	0.013362025	0.022312036	0.001245048	0.008802699	0.017728971	0.02340042	0.007470602	0.017269831	0.024799397	0.043925341	0.03392471	-0.011057068	0.044302545	0.031423673	-0.01625457	0.019231785	0.032571435	0.010272475	0.017600639	0.030099759	0.005871271	-0.010066218	-0.004265586	0.027130701	-0.012162753	0.000531524	0.027171539
	638049	0.017690998	0.002108156	-0.017073305	0.016916627	0.001316116	-0.018975774	0.019361485	0.03847871	-0.007110137	0.013428197	0.032838035	-0.010286066	0.009558163	0.031181803	0.018101167	0.006662923	0.027236968	0.020094991	0.022372833	0.022572147	-0.010590718	0.019367376	0.018540738	-0.011649717	0.023567302	0.051234938	-0.00057396	0.016810577	0.04361023	-0.003425451	-0.005434984	0.010214319	0.030733826	-0.004571493	0.010021405	0.033116158
	645551	0.041612279	0.008140688	-0.028839104	0.043720711	0.003737853	-0.030530864	0.0145608	0.045276385	-0.001663157	0.014033064	0.041605294	-0.011237737	0.002295531	0.023001449	0.0148294	0.001964884	0.022886457	0.01123271	0.031980015	0.016500523	-0.01885201	0.032840453	0.012102838	-0.020665521	0.024533182	0.064232528	0.012442756	0.022855302	0.060179356	0.001638572	-0.01085439	-0.005013761	0.027002769	-0.011121161	-0.002380761	0.03106321
	654754	0.004683766	0.064765282	-0.022398259	0.002766109	0.047470476	-0.025836254	0.003711937	0.051208287	-0.006554349	-0.000156074	0.04208811	-0.012402386	0.000914944	0.022095898	0.014028988	-0.000675427	0.019213449	0.013877269	0.028522978	0.045655061	0.02274684	0.026689243	0.042262185	0.018133951	0.019826502	0.070305683	0.012779964	0.014632555	0.062704183	0.003226687	0.007452302	0.031662468	0.015433749	0.004055563	0.03025496	0.010825593
	665254	0.033547029	0.035681341	0.003168972	0.034232557	0.030416528	0.000546206	0.026225479	0.044393733	0.006898473	0.025122864	0.037097178	0.004591935	0.023417633	0.035012428	0.017063698	0.023277726	0.03142783	0.015937682	0.045780033	0.050607082	-0.000171309	0.047981542	0.041447144	-0.004036209	0.042658396	0.061908744	0.010556361	0.041487496	0.052397106	0.007005379	-0.002937837	0.026145726	0.029175743	-0.005166068	0.024986591	0.029142171
	672756	0.02952026	0.043568693	-0.009469937	0.02548798	0.035324696	-0.012198424	0.008740881	0.037411064	-0.006054478	0.005950587	0.031187942	-0.009085169	0.004283908	0.030813215	0.00780252	0.001784263	0.02647871	0.007446132	0.028561404	0.041959986	-0.001427322	0.026663331	0.035694141	-0.003803782	0.016519859	0.038593601	0.001694115	0.015213121	0.033651557	-0.000403418	-0.016269591	0.008551759	0.003912746	-0.017157895	0.007542585	0.004757313
	677968	0.024944231	0.018879868	0.00978202	0.024855757	0.016757559	0.012363906	0.013048583	0.024600586	0.027528422	0.013460036	0.023578718	0.028572824	0.008442936	0.017350424	0.029370708	0.008578546	0.017154606	0.032685578	0.020359747	0.019906275	0.002003106	0.018874506	0.018431686	0.00202979	0.022189304	0.033697907	0.025524201	0.020882849	0.030731266	0.027026327	0.009004964	0.018303838	0.034070883	0.007601707	0.019130351	0.037774958
	679568	0.01920403	0.036838021	0.001840305	0.019950766	0.032244407	-0.002371384	0.009510634	0.036993165	0.001237617	0.009546549	0.031249639	-0.00361159	0.004405992	0.017765187	0.021321112	0.003673929	0.016532959	0.022469301	0.024466436	0.055522352	0.00742189	0.022898087	0.048336945	0.002053757	0.011887646	0.053055931	0.00943434	0.010872372	0.045930289	0.003496982	0.008391283	0.013178302	0.030472407	0.006632425	0.014390729	0.034341969
	683256	0.026095524	0.036756411	-0.015630996	0.025615955	0.031734936	-0.02213322	0.029195329	0.047271635	-0.011288057	0.027703069	0.041098207	-0.019250963	-0.002440716	0.002760253	0.026161224	-0.000385373	0.004331531	0.030103372	0.033426154	0.047318414	-0.013516285	0.032799721	0.041713376	-0.022016238	0.028748941	0.065851063	-0.013811992	0.02804173	0.054252043	-0.023459557	-0.015214926	-0.01690417	0.039934233	-0.013101385	-0.011872333	0.049620051
	685058	0.023915028	0.031358548	0.002498035	0.022784472	0.028837252	-0.004745693	0.021528281	0.015098925	0.013974851	0.023684435	0.018537959	0.003740471	0.01881507	0.015554599	0.006102121	0.020663086	0.015550484	0.001296386	0.020905547	0.037792969	-0.015147623	0.019605264	0.030204291	-0.023539083	0.005927369	0.035027109	-0.007638613	0.00416537	0.023808701	-0.005715893	0.003547214	0.018218711	-0.010532994	0.001313459	0.013719143	-0.016895294
	695768	0.025579624	0.030392295	0.001753697	0.02561643	0.023171222	0.004396744	0.00630257	0.037622437	0.020299707	0.004030645	0.031994537	0.018372847	0.019230237	0.013887673	0.009624016	0.019823387	0.012227091	0.012517868	0.002663871	0.030385381	0.007705644	0.001670981	0.024567619	0.006027258	0.000683433	0.035212032	0.022357818	-0.00136548	0.030022841	0.020994909	-0.007186314	0.016673727	0.032868419	-0.00838189	0.015986178	0.033117216
	704238	0.033035215	0.02103943	-0.010399503	0.035241608	0.016884372	-0.012919805	0.004793488	0.023362769	0.005454149	0.003233886	0.020472936	0.003879111	0.009261879	0.023594189	0.016432056	0.007088336	0.022401826	0.015971832	0.051331788	0.024429029	-0.01229507	0.053785775	0.020180125	-0.016620906	-0.001338007	0.027785365	0.007291084	-0.002801887	0.024733903	0.004112348	0.005077404	0.025243403	0.025020927	0.004446155	0.022870716	0.026777979
	705341	0.062240835	0.005049171	-0.020009583	0.064417936	0.004654861	-0.021877872	0.031032763	0.02956049	0.007892012	0.028603828	0.028847657	0.005218743	0.020351358	0.017922997	0.01066367	0.019334454	0.016457554	0.010937012	0.022671267	0.028736476	0.010997063	0.020648226	0.025539784	0.009842403	0.028840918	0.045615505	0.0237769	0.024376422	0.042817831	0.02164349	-0.016821163	0.023385471	0.034573976	-0.019204244	0.021305338	0.037592687
	709551	0.031704146	0.025218096	-0.007453672	0.030767513	0.022875052	-0.013379522	0.008669434	0.029216845	-0.002147733	0.006308368	0.025542853	-0.006597434	-0.00083503	-0.000807534	0.020708969	0.000953406	0.001411409	0.022500658	0.0204264	0.02640303	-0.008884471	0.016865596	0.023430964	-0.015530711	0.017308014	0.039396193	-0.003114172	0.013756752	0.034473326	-0.008481566	-0.005096296	0.011569724	0.035377286	-0.006715718	0.011770096	0.038677156
	713239	0.026061349	0.026028397	0.017018639	0.029673105	0.024801586	0.017266031	0.021872351	0.030147135	0.013037477	0.024715733	0.028938448	0.011459571	0.016763993	0.023135873	0.015015464	0.019468566	0.023442334	0.013929884	0.023690807	0.026158974	0.011951693	0.026804581	0.024935272	0.011137449	0.023035409	0.031891022	0.012677237	0.026582073	0.031163199	0.010422458	0.004612654	0.013839524	0.005320704	0.007494687	0.015591163	0.002766158
	715647	0.027041145	0.022906816	0.017103864	0.027039984	0.023378773	0.015859373	0.020001087	0.022422945	0.019961767	0.020673232	0.020999601	0.01953215	0.019896811	0.033032916	0.029866772	0.019567795	0.031187452	0.031664848	0.011207157	0.039349813	0.042423017	0.01009104	0.036085691	0.043344062	0.015251061	0.042427666	0.052827753	0.015901066	0.039701477	0.056067813	0.001266978	0.024171619	0.042029101	0.002006546	0.022212034	0.044445086
	729254	0.054864898	0.020810198	-0.026093135	0.065387808	0.014361353	-0.030025152	0.038074858	0.024603155	-0.024550388	0.044873271	0.019067392	-0.031282168	0.008873788	0.000363897	0.001355138	0.009608673	0.002878177	-0.001061158	0.047496937	0.007826859	-0.012936329	0.059713408	0.001920798	-0.011970373	0.037832987	0.03622653	0.013280603	0.044338293	0.029847508	0.013433465	0.000876883	-0.011809862	0.027023107	0.003451947	-0.008735521	0.032898583
	729557	0.016446518	-0.002281558	-0.019575739	0.02119969	-0.003377866	-0.023457557	0.014700135	0.022030234	0.007239967	0.015070299	0.020443665	0.003287337	0.010274244	0.020877656	0.017901691	0.009979578	0.018870771	0.019283518	0.010965969	0.013326776	-0.012021425	0.015938712	0.007027355	-0.010975177	0.004947543	0.040205218	0.01160047	0.005857605	0.031881474	0.01306005	0.002050287	0.018402738	0.041135885	-0.000397544	0.018955097	0.043731321
	732243	0.038508482	0.025126146	0.017227374	0.038619787	0.02682128	0.016322389	0.038131617	0.032290999	0.017339649	0.038502268	0.032792542	0.015139061	0.021515334	0.02349784	0.028081475	0.022676378	0.025403617	0.027785556	0.054687858	0.037756383	0.018451894	0.054592337	0.038316842	0.016329484	0.05812211	0.044430878	0.025739871	0.058170348	0.045223325	0.02285753	0.021008017	0.028028604	0.044354718	0.023379928	0.030154975	0.047109772
	734045	-0.003018168	-0.005121278	-0.01791003	-0.001480232	-0.008568435	-0.021094292	0.022682589	0.038713433	-0.004524068	0.020925434	0.030885523	-0.010409753	0.026114685	0.042512018	0.021138569	0.023852721	0.036783174	0.023222419	0.009291257	0.014221448	-0.006390994	0.00602226	0.011448174	-0.010585486	0.003100051	0.009060409	0.007411186	0.000402138	0.009493585	0.001979887	-0.000296668	0.00731639	0.039265495	-0.002761805	0.01091534	0.04306791
	742549	0.021018498	0.011537112	0.017024713	0.021607492	0.012102912	0.016330203	0.012076531	0.012184568	0.022394154	0.012950182	0.013025071	0.021804191	0.005346764	-0.004785475	0.02262138	0.006540773	-0.00044895	0.023592543	0.011938047	0.010741984	0.017726669	0.012012941	0.008377709	0.017665368	0.023184946	0.028342389	0.03997273	0.025141874	0.026620848	0.040175498	0.000884792	-0.008889164	0.027435612	0.001279747	-0.003314221	0.029905653
	748258	0.051583312	0.0095218	-0.017870871	0.055588096	0.006562335	-0.019752145	0.005447139	0.046663001	0.01253092	0.000443746	0.041083418	0.006137512	0.002303779	0.021131437	0.02781756	-0.000397101	0.021509806	0.027341247	0.047800191	0.041417386	-0.016529072	0.046710748	0.032806519	-0.022481773	0.002723535	0.068240806	0.017853703	-0.005699685	0.059564963	0.009287537	-0.009008575	0.014593033	0.028110456	-0.012084649	0.016290305	0.027435709
	751348	0.032579876	0.027499236	0.027039994	0.035631329	0.024168717	0.030377608	0.021300379	0.037485212	0.031603057	0.022523234	0.032459714	0.034070421	0.021547228	0.024301395	0.029948227	0.025104843	0.023941223	0.031000618	0.015759621	0.015498744	-0.004456447	0.019812213	0.012314259	-0.008123508	0.015120391	0.025244448	0.003498924	0.018058386	0.021424796	-0.001468278	0.006345808	0.007300199	-0.001912861	0.010542271	0.007221172	-0.005460667
	761957	0.039464757	0.056936607	0.009856938	0.032848008	0.052226387	0.005740074	0.023007652	0.053486135	0.018093677	0.017529618	0.047034562	0.015126953	8.10E-05	0.020646619	0.023515703	-0.001515252	0.018299354	0.023721827	0.024034416	0.04432489	0.02090379	0.020832531	0.042163104	0.016053272	0.026482457	0.069023483	0.035927754	0.019290745	0.063875809	0.032767367	-0.007215058	0.018378491	0.038010463	-0.007556805	0.01738384	0.041145314
	771354	0.034423385	0.011921879	-0.020503033	0.038471792	0.007556594	-0.022026634	0.015917975	0.0670688	0.037416164	0.011088591	0.059349108	0.035928208	0.009216038	0.038609151	0.05298651	0.00471295	0.038392458	0.052555252	0.028810624	0.031329319	-0.010613386	0.031212201	0.024335273	-0.01063267	0.020199033	0.071459495	0.047751799	0.014746285	0.064944416	0.046514563	0.009386729	0.031890832	0.054469686	0.004329927	0.034037217	0.05283621
	779370	0.017032336	0.018788008	-0.001603887	0.018117802	0.017675636	-0.006308673	0.006481946	0.025997775	0.007910878	0.006933999	0.023962526	0.004377679	0.002564318	0.012243733	0.017589973	0.004645237	0.011385801	0.017316356	0.013610384	0.037155591	0.013582464	0.014159632	0.034690976	0.008709483	0.012335467	0.045391735	0.030747745	0.012081778	0.042925976	0.027939292	0.014355249	0.017430179	0.039617576	0.015811263	0.019178025	0.041430973
	782561	0.027404066	0.01125799	-0.003355292	0.028606728	0.010232782	-0.00161406	0.018799176	0.029745746	0.003324761	0.014631935	0.026898548	-0.001117731	0.011366514	0.024485249	0.024421681	0.009007696	0.023779791	0.023475759	0.026542241	0.026098078	0.006561035	0.024526292	0.024994595	0.00608838	0.023808559	0.042475704	0.010149254	0.019435856	0.038676817	0.004614377	0.011160567	0.027540786	0.031266298	0.01058483	0.025957288	0.032343969
	784565	0.04463654	0.031952959	0.026716093	0.041694291	0.032268591	0.027501248	0.024339093	0.030907229	0.022165444	0.021464378	0.030064028	0.02123316	0.02652033	0.014166853	0.020180695	0.025692692	0.015626568	0.021870324	0.056302179	0.034616046	0.028458843	0.054296024	0.03551513	0.030371154	0.029650493	0.04302096	0.030486712	0.025440052	0.041373905	0.029935811	0.037420139	0.012390322	0.02162954	0.037203692	0.014709279	0.025479259
	788876	0.007339763	0.004635861	-0.007619902	0.009007168	0.003510864	-0.011033133	0.018259216	0.029254816	0.008835414	0.019014835	0.02410252	0.008263133	0.003922156	0.022320583	0.030020924	0.002800903	0.020737614	0.032474805	0.020785622	0.00489588	-0.007943824	0.02339356	0.003977617	-0.011284715	0.032203201	0.036366563	0.005710209	0.034971081	0.030465566	0.003720698	0.005914752	0.014471028	0.032203812	0.005908867	0.014860013	0.0352653
	789373	0.009922524	0.027872203	0.018097499	0.012805993	0.023909064	0.019947842	0.015401886	0.040982608	0.029387228	0.016637705	0.037132241	0.029375531	0.016398454	0.03374457	0.038232822	0.017728368	0.033028744	0.038466536	0.020059925	0.024314687	0.008763792	0.024427781	0.021789912	0.008572886	0.022024037	0.061280567	0.046047378	0.023151273	0.0557855	0.046162367	0.011673721	0.036822848	0.048674054	0.011247749	0.036385074	0.049812887
	802844	0.014232227	0.02265624	0.022780463	0.014245027	0.020538142	0.02310661	0.013387931	0.0322625	0.029807679	0.015099563	0.028937217	0.02741378	0.016732655	0.016978059	0.041619193	0.015833454	0.021042502	0.041780096	0.014822267	0.01200446	0.00730264	0.012229909	0.011950321	0.007292846	0.026109515	0.039764825	0.034252182	0.024803985	0.038128428	0.031185277	0.020911396	0.022158727	0.035425071	0.017659413	0.024871865	0.036976792
	816653	0.039280269	0.008252247	-0.025173932	0.041560449	0.006052223	-0.025732756	0.015687356	0.038157661	0.011501121	0.015663709	0.032083537	0.006147427	0.008222485	0.007154878	0.03164513	0.008015405	0.009417009	0.032146685	0.034109209	0.010565949	-0.030827232	0.036148686	0.006899734	-0.032036532	0.020720534	0.044670265	0.007142619	0.020868555	0.036857158	0.001700871	0.014156107	0.019129368	0.045896806	0.012607507	0.02035482	0.047716953
	826353	0.040086731	-0.001121342	-0.024323873	0.041443743	0.00248356	-0.028313141	0.036045644	0.026393626	-0.006400373	0.035777427	0.024726443	-0.009912293	0.016577434	0.033293556	0.03028189	0.014554282	0.033030067	0.030777657	0.047031421	0.014758985	-0.017333381	0.046849318	0.016965399	-0.021867044	0.030218044	0.056380089	0.024777487	0.027047912	0.051515024	0.023207162	0.007964027	0.026088659	0.04001528	0.007785121	0.027150502	0.041718543
	833148	0.054752909	0.019527057	-0.005291404	0.050338641	0.021511061	-0.00862489	0.034799345	0.024684215	0.008700046	0.030864879	0.024577409	0.006584816	0.017436614	0.035245493	0.025905501	0.014331039	0.0306655	0.027308306	0.028864853	-0.003116239	-0.030466212	0.027295128	-0.001380467	-0.03413805	0.044669054	0.027798995	-0.003988441	0.040292785	0.026612433	-0.007979324	0.013092126	0.037565898	0.021084284	0.009800579	0.030991994	0.022509621
	837560	0.024027904	0.038116839	0.028642355	0.02452185	0.031535473	0.030088451	0.013714783	0.026679445	0.034731235	0.016620275	0.022733118	0.036371231	0.000560128	0.003348575	0.029799471	0.005641423	0.002130907	0.032797884	0.03478035	0.055117231	0.035509717	0.032392532	0.047715016	0.03534304	0.026617525	0.059731238	0.048284374	0.022997908	0.055800781	0.045346431	0.000723898	0.006922728	0.034108989	0.00478468	0.006585591	0.036337189
	837964	-0.052355744	-0.04182142	-0.011505519	-0.04774664	-0.04326769	-0.004382677	0.045116801	0.085316479	0.037772164	0.039929342	0.079987802	0.029965894	0.047582626	0.067404561	0.034700338	0.041950211	0.065946765	0.028104398	-0.046386886	-0.046678811	-0.019158855	-0.040331025	-0.048727255	-0.011442664	-0.009285411	-0.005435409	-0.003319898	-0.007636828	-0.008461586	0.001077878	-0.02550558	-0.028840145	0.001533281	-0.023116283	-0.027461672	0.007641844
	845458	0.036348436	0.024453018	-0.022899134	0.029719057	0.021857567	-0.030185005	0.025380218	0.028447177	-0.008642909	0.020048605	0.026246712	-0.014830085	0.008875564	0.010025359	0.022848371	0.006916115	0.011520064	0.02453891	0.030383209	0.026798727	-0.023676833	0.024445549	0.022433853	-0.030836567	0.033358801	0.040700708	-0.009412642	0.027225122	0.037131634	-0.01756797	0.001714413	-0.001635442	0.043126773	0.002879336	0.002924416	0.050787333
	849971	0.040934712	0.009179805	0.011660397	0.041448161	0.011212807	0.011560771	0.030261174	0.033772215	0.0291625	0.029536096	0.031498007	0.030224174	0.026387693	0.033464391	0.04277619	0.025612276	0.031848148	0.045200139	0.040576145	0.017803527	0.015541326	0.041463941	0.017344838	0.016870487	0.02624825	0.030600239	0.027499057	0.026014375	0.027616123	0.029699249	0.024624525	0.02485466	0.028893998	0.024157315	0.022968512	0.031231415
	856766	0.035380024	0.018438729	-0.004774329	0.038984124	0.015002263	-0.007565466	0.015925366	0.013609461	0.008915946	0.016011961	0.011022572	0.00720403	0.017225813	0.020198459	0.016773149	0.017396178	0.020744411	0.01437451	0.030595914	0.016326578	-0.002146934	0.032397188	0.012770724	-0.003731522	0.017309848	0.01307889	0.009926587	0.017040972	0.010692196	0.010178631	0.002412803	0.004812882	0.027309814	0.000495796	0.005484841	0.029527033
	857263	0.042595491	0.053315479	0.003632146	0.040740609	0.047316287	-0.003682325	0.034674507	0.044905942	-0.00362054	0.033556361	0.038739696	-0.010752467	0.035944443	0.03319991	0.027552158	0.036595251	0.03327667	0.02553287	0.031546932	0.034461051	-0.009101563	0.030618338	0.029214242	-0.016690342	0.028509276	0.034047008	-0.002137557	0.028578915	0.030084763	-0.009591962	0.006482005	-0.00385661	0.027540043	0.009228877	0.000544128	0.03173586
	859671	0.019271867	0.01164245	-0.006906469	0.020392159	0.010756878	-0.009593945	0.028568977	0.031539198	-0.000355325	0.026968112	0.030715957	-0.005745078	0.004909284	0.012338408	0.028497994	0.004443252	0.013336815	0.029446064	0.011077893	0.010684985	-0.013755455	0.010831173	0.00903375	-0.018765392	0.019227533	0.017828422	0.013640814	0.015075962	0.022282995	0.008199573	-0.004176023	0.006018544	0.022535563	-0.005058409	0.006796835	0.027066177
	861456	-0.006967254	-0.007194064	-0.027928814	-0.00463564	-0.010472695	-0.023394303	0.001861336	-0.004439979	-0.029624939	0.004801578	-0.008061742	-0.02509949	0.005413006	-0.001913994	-0.01295178	0.008662934	-0.004267467	-0.008165833	0.007976632	0.006882331	-0.001093084	0.007748329	0.008427155	-0.006065063	0.038784489	0.033136811	0.009130023	0.037916861	0.033528652	0.003069861	0.000289564	0.003158188	0.009243961	0.000489446	0.003595356	0.009884416
	865363	0.026640844	0.025830837	0.002111132	0.029118586	0.022014355	0.000121369	0.024186045	0.044208154	0.017241463	0.023801254	0.037991352	0.016626857	0.015424529	0.029681547	0.025863942	0.015380559	0.027169732	0.026129885	0.036122814	0.035820384	0.020981096	0.036839113	0.034117237	0.018390663	0.023721071	0.047734775	0.033977225	0.023959238	0.042880975	0.033386536	0.009535708	0.04172799	0.04070992	0.009220807	0.036049195	0.042830326
	871762	0.015190201	-0.003908101	-0.016742805	0.018159246	-0.00778323	-0.011585193	0.01627071	0.035768013	0.001348084	0.010792767	0.033963032	-0.003387372	-0.002926541	-0.011186138	0.01323462	0.001110789	-0.01369065	0.019583886	0.015096715	0.029152777	0.009276341	0.010598907	0.030382581	0.003058409	0.026807377	0.054693978	0.026971949	0.018725567	0.057307132	0.018051801	0.003316413	0.026829798	0.056342229	0.001767549	0.025877874	0.057633791
	871964	0.034259718	0.026406378	-0.013213889	0.032282248	0.021605494	-0.01556598	0.022431016	0.044415437	-0.006598517	0.021358648	0.0350154	-0.009885514	0.001250702	0.029181194	0.036114193	0.000133304	0.026618904	0.036903813	0.033017386	0.034284439	-0.012629875	0.031374831	0.028594665	-0.015358044	0.025319006	0.0487503	0.001799948	0.023740087	0.041672066	-0.000617883	-0.009953668	0.000750839	0.039059132	-0.011658241	0.004346758	0.043389644
	872158	0.013785851	0.006427945	-0.015599786	0.016108233	0.006647234	-0.016594904	0.023996046	0.042612448	0.009042091	0.024646722	0.042150363	0.003623227	0.00433745	0.033067841	0.026409574	0.002987706	0.031721763	0.025061721	0.003510391	0.010478362	-0.010132087	0.005029664	0.011503929	-0.012777437	0.022432776	-0.000268712	-0.006299129	0.024041334	-0.001957279	-0.001851732	-0.009351735	0.014721299	0.015246549	-0.008558201	0.011648133	0.016599361
	877168	0.01959442	0.023302151	0.011224446	0.020663816	0.022883357	0.0099962	0.028672783	0.038701884	0.018177284	0.027918054	0.03775258	0.014900818	0.028010955	0.028898953	0.030641783	0.029880475	0.030015033	0.029189453	0.042537276	0.018040968	0.008808214	0.045971185	0.02051896	0.006223755	0.036840677	0.04342499	0.019498335	0.036782902	0.042169053	0.015608641	0.009436836	0.000130221	0.012285961	0.010756517	0.001315517	0.012435673
	877269	0.032904577	0.009424383	-0.016281456	0.03661501	0.006288355	-0.017003212	0.028602069	0.021458244	-0.007795775	0.030379178	0.018070087	-0.010060729	0.020149868	0.011150106	-0.006913283	0.021444688	0.009386143	-0.009194403	0.035411712	0.020290881	7.18E-05	0.039347202	0.017042501	0.001655104	0.011281916	0.038006153	0.023705967	0.010766454	0.035237331	0.023304073	0.013269132	0.021974415	0.026787072	0.012379789	0.02231098	0.028542988
	885975	0.04299514	0.02391414	0.006199001	0.040445335	0.023311207	0.003926697	0.028395491	0.028912162	0.005447022	0.02690977	0.025811555	0.003689046	0.028610291	0.02502116	0.010763783	0.028240381	0.023915963	0.011496073	0.050758295	0.033681255	0.005904417	0.048317112	0.032551214	0.003256368	0.044142164	0.044209495	0.022881504	0.040602848	0.043228026	0.018030152	0.013786146	0.018410884	0.028144015	0.012884499	0.020144694	0.027310144
	887373	0.026045782	0.037878077	0.001261452	0.023544079	0.032522064	-0.000166614	0.034508441	0.060537025	0.013030515	0.031539582	0.053657006	0.008708832	0.021339215	0.041566513	0.030793296	0.019348809	0.039157748	0.028857226	0.033232413	0.063080795	0.013906354	0.029481668	0.055069875	0.010891055	0.034693133	0.06437365	0.025245516	0.030825194	0.058222696	0.020868948	0.003639499	0.008135329	0.024954634	0.003068399	0.009203053	0.025998514
	889579	0.016587358	0.011057411	-0.009265007	0.015306856	0.005379871	-0.004765676	0.003072481	0.042039514	0.024867486	-0.000532601	0.035746522	0.024582729	-0.00104387	0.025920715	0.029544538	-0.003247074	0.020067049	0.035499249	0.011810285	0.015675584	-0.00620226	0.009748517	0.01258553	-0.005663518	0.008106833	0.048783693	0.024214201	0.003769663	0.042546019	0.023108393	0.003872768	0.01521933	0.025892658	0.001146447	0.017405799	0.024895065
	894673	0.036766782	0.014412835	0.010188298	0.035568751	0.015482752	0.010490918	0.018785059	0.024881357	0.013713469	0.017946457	0.023873864	0.01185875	0.020107862	0.025535954	0.02489786	0.019585205	0.024181955	0.025309613	0.019638661	0.006547761	-0.00349474	0.016658081	0.007528343	-0.004854428	0.030849466	0.036665358	0.015416949	0.028782446	0.034402806	0.013366142	0.013340917	0.019542409	0.023351157	0.014299302	0.016998563	0.025569972
	896879	0.012464761	0.03304458	0.003859343	0.011686702	0.029182462	-0.001350401	-0.002126659	0.058358632	0.014363609	-0.004473057	0.050320257	0.00753322	-0.000497663	0.04151779	0.041258447	-0.002596936	0.04023806	0.037799876	0.009816355	0.032434706	-0.000247244	0.009752993	0.027958324	-0.003260045	-0.002182151	0.06623558	0.024846779	-0.003946891	0.058502328	0.018525785	0.00759006	0.01649466	0.043325294	0.008170226	0.020164607	0.043529451
	898176	0.021236036	0.029200906	0.003818358	0.02377753	0.025909381	0.004045222	0.015373566	0.023079453	0.014633435	0.017510606	0.021762894	0.015084955	0.017845206	0.012581506	0.007791528	0.020179166	0.012895924	0.007421581	0.009519034	0.021324895	0.005265047	0.011075603	0.018568426	0.00667192	0.020734543	0.039453577	0.025997931	0.021937108	0.035602324	0.02846496	0.026805229	0.029068042	0.045283798	0.027668094	0.028807195	0.051025439
	899885	0.018622221	0.005756256	-0.013250178	0.025141887	0.002726068	-0.015760293	0.030328145	0.04782277	0.001544107	0.031018266	0.040496301	-0.002832476	0.010728503	-0.003153396	0.005166578	0.016800979	-0.001820086	0.003000796	0.042404793	0.079858094	-0.000931755	0.040899325	0.06759955	-0.007659231	0.033779375	0.108912677	0.028309954	0.026644699	0.0958516	0.021337369	-0.005041721	0.033821322	0.038656987	-0.013628745	0.034664076	0.039030764
	901139	0.039327007	0.010591066	0.004799	0.04021265	0.013834154	0.000237674	0.038511228	0.01285813	0.007086603	0.039489347	0.015877608	0.003163964	0.027883334	0.00610036	0.022394137	0.030316338	0.010763749	0.021109246	0.043862291	0.016037745	0.003931816	0.043880764	0.018097684	-0.000905642	0.049100786	0.020496013	0.021615256	0.049897246	0.024376202	0.018092422	0.035731837	-0.002990195	-0.010045654	0.037819743	0.000497322	-0.015386141
	901442	0.050983306	0.012975865	-0.010297853	0.050582033	0.01303144	-0.012867111	0.031707026	0.056065436	0.013305877	0.026548458	0.048667017	0.011499633	0.016727323	0.027773526	0.025644444	0.014994652	0.025182525	0.027855314	0.051363837	0.004379977	-0.019541658	0.053302556	0.004141054	-0.022379601	0.047649894	0.053805713	0.006541084	0.043142539	0.047718558	0.003384352	0.014496242	0.004711482	0.032693624	0.017043484	0.007167172	0.037225999
	904044	0.046227865	0.016734632	-0.026483491	0.04934163	0.012816292	-0.027727244	0.014631988	0.045540567	-0.004420908	0.01580302	0.034452643	-0.00815291	-0.013625193	0.027299177	0.017623415	-0.014811527	0.022762489	0.014184038	0.048951209	0.030679841	-0.024371956	0.051141292	0.024292082	-0.026944658	0.014599016	0.055370241	-0.003852321	0.013780181	0.04427959	-0.009147009	-0.008527716	0.009650745	0.021982234	-0.010442912	0.009152534	0.023444118
	907656	0.025748136	0.00517242	-0.010146107	0.027465979	0.003339969	-0.007143407	0.028642269	0.023181688	0.008845957	0.027993511	0.020449661	0.013244038	0.019287713	0.024878666	0.026131079	0.017338574	0.024846081	0.027225718	0.031622984	0.002161185	-0.007218529	0.034357183	0.00080136	-0.002057234	0.019334482	0.039377503	0.019716026	0.018381514	0.035517622	0.02128082	0.015920835	0.015181154	0.037215672	0.016022004	0.016462732	0.03960884
	910241	0.032603696	0.035536438	0.006803255	0.037307885	0.031889066	0.007058769	0.024941169	0.041283783	0.018827232	0.026832676	0.037549008	0.018525569	0.015362469	0.028064275	0.045060266	0.016534127	0.029485287	0.048620094	0.020505015	0.025490483	0.010831068	0.024264306	0.023174839	0.012026579	0.031327046	0.044061489	0.023394747	0.03416888	0.04017802	0.024365833	0.033213854	0.026464503	0.027219262	0.036585238	0.026495805	0.030014141
	917255	0.033755604	0.03155249	-0.002183765	0.031138567	0.027396869	-0.003624	0.01919264	0.05291564	0.016080284	0.015958166	0.044153873	0.013880336	0.008817937	0.037336327	0.026951922	0.006831287	0.031404436	0.026821943	0.036013711	0.043394029	-0.001591249	0.033377565	0.037378006	-0.004605652	0.019016497	0.059037998	0.027874645	0.016177397	0.050272211	0.025412397	0.002311452	0.02836559	0.032318871	0.000901873	0.025950845	0.033064675
	922854	0.044306245	0.048156153	-0.007938448	0.045141153	0.039344773	-0.006321222	0.039169945	0.061839793	-0.008478307	0.037244044	0.049494915	-0.007643234	0.025166512	0.059369158	0.032474566	0.025515173	0.050117165	0.036934461	0.017150667	0.024478793	-0.014739951	0.016572352	0.017857734	-0.01768636	0.031779256	0.062862128	0.006360856	0.030293336	0.052302379	0.006651883	0.001068347	0.010902579	0.023811376	8.28E-05	0.013709823	0.025291888
	930449	0.005189929	-0.000106772	0.018741952	0.004608213	0.000740738	0.02080266	0.006335864	0.002358508	0.018261595	0.005578978	0.002968756	0.02002102	0.003624218	-0.000759833	0.018303232	0.003112093	0.000113466	0.020301729	0.00141458	-0.001925519	0.017083963	0.000832741	-0.001323893	0.018745964	0.003132382	0.000802459	0.018163035	0.002238666	0.001430193	0.019657688	-0.000101609	-0.001195438	0.022772571	-0.001480452	-0.000314794	0.025380243
	932554	0.04151237	0.048158888	-0.00613325	0.041651256	0.040314242	-0.009683394	0.025084265	0.040947925	0.00397046	0.025023764	0.035259746	0.001040083	0.001719385	0.008571356	0.026054503	0.000586645	0.011903606	0.027637867	0.034191206	0.053534817	-0.007998829	0.03470619	0.043894865	-0.011944817	0.031869512	0.060254831	-0.00298993	0.03091836	0.04996071	-0.008129939	0.001278469	0.015304212	0.020763891	0.001302418	0.014016165	0.024347166
	937160	0.028586205	0.028723033	0.002984557	0.029561944	0.029031765	-0.003592711	0.033218294	0.025742993	0.005952354	0.035180014	0.027515324	-0.00187439	0.049928177	0.02207445	0.011076607	0.054972902	0.024974469	0.00341565	0.010680283	0.025416974	-0.012077344	0.010049213	0.01799502	-0.009822519	0.03646154	0.052591518	0.004895985	0.03482572	0.048339609	0.000236931	0.005586078	0.006594016	0.003892543	0.005344571	0.002967798	0.009383589
	957974	0.021987621	0.019583758	-0.014853023	0.02011013	0.019346608	-0.01854312	0.018457271	0.042647488	0.028741091	0.016521854	0.041712772	0.025252908	0.002156256	0.001886714	0.009242971	0.00092286	0.006039734	0.008399798	0.011996571	0.015532384	-0.019576617	0.00910861	0.016038345	-0.023968032	0.039555274	0.066257164	0.042375397	0.037225343	0.063437842	0.039234307	0.011077149	0.012574608	0.040901754	0.012117301	0.01651945	0.044281982
	958976	0.026980095	0.036169823	0.007345445	0.030096134	0.029589297	0.009757253	0.028480191	0.055157308	0.014535408	0.027965095	0.045544378	0.015562167	0.012425601	0.013334707	0.018696915	0.012227425	0.013128182	0.020292485	0.040818974	0.033727258	0.019914692	0.041209955	0.031964462	0.021276036	0.037548225	0.05537175	0.044544831	0.03431223	0.053324539	0.046559945	0.012786497	0.0262974	0.038845398	0.012489147	0.025798539	0.04316251
	959574	0.022955172	0.020329809	-0.00462475	0.02230116	0.01841826	-0.008751919	0.009882389	0.044378147	0.014062305	0.008957551	0.038872674	0.009307651	-0.001008511	0.022279305	0.036988296	-0.001869611	0.020035097	0.042529814	0.027721047	0.049220178	0.012159807	0.026975306	0.044071119	0.007743305	0.021280281	0.060137872	0.032796297	0.019556016	0.055179846	0.027625438	-0.009900542	0.016495299	0.04025184	-0.011474201	0.015438595	0.043994762
	965367	0.011499532	0.017348507	-0.005604317	0.013894215	0.012351249	-0.007519872	0.007231846	0.024011994	0.003202434	0.007897872	0.019286126	0.0008203	0.004986941	0.010533526	0.011376909	0.005365056	0.009147675	0.013328249	0.017729316	0.019601073	-0.001975324	0.020062996	0.015378477	-0.002211161	0.026450472	0.024646228	0.018298639	0.027966607	0.022881545	0.017182752	0.01757751	-0.00631369	0.030336587	0.016793352	8.04E-06	0.033871029
	965771	0.062461149	0.04639915	0.035481464	0.061154354	0.044886891	0.037765227	0.045609273	0.047797482	0.045028355	0.042408902	0.046640843	0.046660271	0.031350628	0.026447393	0.045732856	0.030122718	0.026556412	0.050343435	0.053143986	0.035202123	0.034999091	0.051404417	0.034590192	0.037846711	0.047873005	0.053377654	0.054805342	0.04399541	0.051616784	0.056808889	0.043550134	0.044220764	0.069606349	0.041244656	0.043980293	0.076004148
	978578	0.059636731	0.039557874	0.005615356	0.064660221	0.034637898	0.005557041	0.047039717	0.05394192	0.023476286	0.049399637	0.047863189	0.021880776	0.036369994	0.040130906	0.031521317	0.038690254	0.037573006	0.031847827	0.041694462	0.042885259	0.004288518	0.043940425	0.035644587	0.004122873	0.044140786	0.055198565	0.022358505	0.045897249	0.048441689	0.020853288	0.046281304	0.028403359	0.023565017	0.05092293	0.027189221	0.02535574
	983773	0.032339185	0.049453381	0.001727775	0.034988288	0.038755488	-0.001061287	0.022331011	0.021361273	-0.007039806	0.022990301	0.02020951	-0.012058812	0.012879092	0.045984201	0.03181437	0.011372094	0.040144674	0.031541705	0.010387726	-0.021460174	-0.012983017	0.012572914	-0.016336909	-0.013943138	0.011400136	-0.007661362	-0.007797448	0.011388971	-0.003298691	-0.010235375	0.008763066	-0.000134556	0.037795722	0.008498106	0.006511353	0.039883781
	987983	0.054698069	0.051342938	0.007448399	0.04990549	0.048982307	0.004363489	0.022591177	0.049856316	0.002199639	0.017784353	0.044525746	-0.003932056	0.01465143	0.030841352	0.019150624	0.012655409	0.029507458	0.016636146	0.051475655	0.06941627	-9.08E-05	0.045866203	0.064163536	-0.008170007	0.032900516	0.070302211	0.004905574	0.026342887	0.063457906	-0.003610615	0.023384705	0.046841647	0.037798155	0.021274662	0.045243662	0.035257552
	991267	0.016023148	0.034049086	0.0138793	0.017363371	0.030349566	0.006607376	0.015459197	0.03635788	0.021915503	0.015831962	0.033593792	0.016035745	0.019369617	0.016311537	0.034206659	0.017900739	0.019667638	0.033371095	0.025172181	0.028403673	0.008172986	0.027556628	0.022644497	0.010190695	0.03170551	0.048656188	0.034824643	0.032410756	0.04409242	0.031242281	0.018264679	0.015082382	0.030449945	0.021974396	0.014531625	0.033420671
	992774	0.063238263	0.030120794	-0.006116907	0.064321466	0.029955514	-0.011865381	0.040067963	0.046496332	0.002570665	0.036732085	0.042656198	-0.003088737	0.039281059	0.033505306	0.020652574	0.038947538	0.032168776	0.018887263	0.083517946	0.060297761	-0.000319654	0.081498429	0.05779393	-0.008860066	0.046924755	0.059817746	0.015330093	0.043285184	0.055424858	0.009753388	0.009118548	0.024429008	0.040269509	0.008064333	0.024624776	0.043049771
