# Supplementary material for: Microstructural organization of human insula is linked to its macrofunctional circuitry and predicts cognitive control
Source: eLife. 2020 Jun 4;9:e53470. doi: 10.7554/eLife.53470 (PMC7308087; doi:10.7554/eLife.53470)
Supplement: Figure 6—source data 2. [file elife-53470-fig6-data2.csv]

Insula	subjId	rPI						rdAI						rvAI						lPI						ldAI						lvAI
ACC		rPI	rdAI	rvAI	lPI	ldAI	lvAI	rPI	rdAI	rvAI	lPI	ldAI	lvAI	rPI	rdAI	rvAI	lPI	ldAI	lvAI	rPI	rdAI	rvAI	lPI	ldAI	lvAI	rPI	rdAI	rvAI	lPI	ldAI	lvAI	rPI	rdAI	rvAI	lPI	ldAI	lvAI
	100307	0.038248759	-0.001763814	-0.045117658	0.034773782	0.019087039	-0.044996921	0.022229113	0.027167521	0.025506005	0.022166077	0.028179241	0.026242016	0.01082033	0.006763992	0.024774447	0.012024937	0.00513529	0.025372986	0.022287617	-0.000441629	-0.043912388	0.018269081	0.01373036	-0.045140296	0.033504713	0.056177959	0.034842033	0.030928766	0.053149089	0.034516204	0.018404413	0.045785282	0.056202192	0.017908761	0.037350345	0.056615025
	100408	0.033244271	0.042602375	0.006313995	0.033093374	0.041444324	0.007045191	0.010698491	0.025625482	0.008495524	0.007595291	0.024816882	0.009106261	0.00466744	0.020588651	0.006616376	0.00181071	0.018330242	0.007245937	0.041582398	0.025814142	0.016838467	0.042601168	0.030342476	0.016333515	0.015606883	0.020299776	0.006318403	0.012475539	0.02130061	0.006662976	0.018263254	0.003842924	0.040684771	0.01394255	0.012343995	0.040566731
	101006	0.038212799	0.022112021	0.003878706	0.038907114	0.029529346	0.003403837	0.032761414	0.033157308	0.008443658	0.032077298	0.038156904	0.008679535	0.016246652	0.032044657	0.016517716	0.017049171	0.030981759	0.016965888	0.0533139	0.029297765	0.005745806	0.054230317	0.040665239	0.004774628	0.039603703	0.041547712	0.009606874	0.038905047	0.04826254	0.009289773	0.017506547	0.029946649	0.0177586	0.019228578	0.031580824	0.017620668
	101309	0.033263389	0.006357991	0.014380822	0.035392139	0.010122476	0.013549929	0.021296836	0.02664149	0.030355966	0.02034162	0.026763149	0.030156203	0.011329244	0.013286376	0.027200826	0.00937358	0.015889054	0.027316287	0.076902859	0.043292776	0.014409357	0.074897043	0.057668924	0.014955104	0.013134831	-0.001210658	0.010131778	0.018348653	-0.007489723	0.011238975	0.005939392	0.00595073	0.031115688	0.009097029	-0.000970577	0.031606648
	101410	0.044002857	0.007481287	-0.001483134	0.043715987	0.019358637	-0.000404512	0.010318422	0.039494462	0.03491066	0.003557475	0.043654885	0.036626026	-0.003330868	0.022659173	0.027143653	-0.005026459	0.02101793	0.027763132	-0.019693697	0.009483661	0.002480355	-0.024410132	0.016227107	0.004427869	-0.059060708	0.037347805	0.023358947	-0.076270044	0.042695273	0.026382672	-0.025959877	0.026676871	0.019961087	-0.026809512	0.020487718	0.020647187
	101915	0.069437422	0.01142794	-0.015045581	0.074420176	0.025291521	-0.015868532	0.032756433	0.022104044	0.0008336	0.030693185	0.029449921	0.000949287	0.029873066	0.015267592	0.009344553	0.029890843	0.019245813	0.009537314	0.082970239	-0.0111892	-0.041535042	0.094652154	0.00183437	-0.042831454	0.064344078	0.016134007	-0.012096399	0.065734878	0.025161495	-0.012351384	0.027071105	0.014843088	0.009927033	0.02820226	0.016643481	0.010739841
	103414	-0.017565256	0.062944986	-0.016220806	-0.021536449	0.051156946	-0.014102645	0.003458018	0.031860221	0.002142851	0.000325539	0.03070958	0.002953506	-0.000613841	0.03292362	0.019589977	-0.003409134	0.029741626	0.020272832	0.031949952	0.033250246	-0.011059674	0.027204806	0.037307348	-0.010025794	0.026529672	0.036535114	0.002647616	0.022659238	0.037980393	0.003459898	-0.027859993	0.073981978	0.015519103	-0.031017682	0.057234552	0.016983546
	103818	0.027196992	-0.016217208	-0.052873109	0.030558972	-0.008347827	-0.053565465	0.022775223	-0.014935085	-0.040908635	0.024848301	-0.008093255	-0.041438088	0.011285149	-0.00527088	-0.008107739	0.014457813	-0.005591415	-0.008567059	0.045836564	-0.017667802	-0.048449725	0.045323268	-0.001093645	-0.048914205	0.015494456	-0.007160057	0.01828854	0.01370578	-0.002389767	0.0177205	0.011312514	-0.00620806	0.008516644	0.011316604	-0.004046338	0.008214557
	105014	0.065928772	0.01196656	-0.016974149	0.069727302	0.021397024	-0.016960364	0.004954777	0.023737056	0.013254751	0.004569733	0.020148074	0.014606187	0.005171638	0.02125573	0.022759147	0.006101652	0.015595719	0.02374278	0.045016345	0.03246218	-0.000758583	0.043723252	0.041840125	0.000525199	0.014977215	0.048955332	0.023112286	0.010857777	0.049441986	0.025416056	0.001873184	0.028166573	0.036043119	0.001067103	0.02360191	0.03735479
	105115	0.038555272	-0.007895668	-0.009105727	0.036695328	-0.001104161	-0.009017279	0.019151691	0.036417402	0.018765884	0.013737705	0.040252626	0.019066742	0.0083792	0.021972638	0.023869665	0.007108849	0.020166945	0.024686888	0.037058786	-0.015341098	-0.002468071	0.036602013	-0.00799575	-0.002092495	0.021393165	0.034989323	0.018366717	0.014816837	0.04581818	0.018044941	0.000592959	0.042317964	0.049860124	-0.000956789	0.042385373	0.051024117
	105216	0.03383664	0.010163955	-0.019747868	0.029512813	0.018582249	-0.020272546	0.014240311	0.024172463	-0.000617833	0.008615352	0.027136762	0.000236825	0.000539035	0.013314346	0.032485157	0.001684568	0.009485172	0.032951888	0.046253111	0.019709017	-0.006583211	0.043552946	0.028434282	-0.00775416	0.018939832	0.045063172	0.019904846	0.012603445	0.047729205	0.020561693	0.002982951	0.033708069	0.056712255	0.002692913	0.027809024	0.057317916
	106016	0.04073425	0.025038851	-0.004392673	0.043839339	0.024324946	-0.004052886	0.02414771	0.026298821	0.012600182	0.024112746	0.024975711	0.012994842	0.015522	0.022033866	0.026623456	0.016343528	0.019101562	0.026909705	0.043436106	0.027932746	-0.004560138	0.046139292	0.027352668	-0.004439304	0.059234306	0.046261668	0.022699783	0.060726721	0.045240831	0.023747005	0.032508429	0.022406308	0.042172939	0.033438686	0.023309868	0.042571213
	106319	0.052722752	0.01314806	0.006282657	0.055263415	0.022951806	0.005794209	0.024196474	0.002592819	0.005571292	0.026392134	0.004734659	0.005740302	0.019684739	-0.00945494	0.007904899	0.022090765	-0.007034525	0.008084548	0.054099746	0.087128997	0.035262469	0.05140524	0.090505742	0.035822868	0.048292913	0.012177664	0.034335244	0.050207939	0.016921571	0.034744326	0.058205839	0.063953176	0.065668263	0.056238167	0.068276629	0.067233212
	106521	0.009328563	0.012667588	-0.009065052	0.004765677	0.016287653	-0.008294334	0.006813134	0.040570062	0.028547522	0.001758097	0.03790671	0.029461624	-0.003104494	0.011318712	0.031799551	-0.003866453	0.006941912	0.032250982	-0.019336233	-0.000650081	-0.009628933	-0.02486933	0.000132269	-0.009025007	0.024718322	0.05439705	0.012974326	0.015001499	0.059352379	0.014385316	0.010063967	0.024078468	0.043842297	0.006894012	0.02292013	0.044895433
	107321	0.016696319	-0.00181862	-0.003673618	0.019057138	0.001474161	-0.003689651	0.021472957	0.008924743	0.006205839	0.022418456	0.010043107	0.006286317	0.00117656	-0.015093857	0.006928548	0.001828586	-0.013900413	0.006798791	0.013617733	-0.009597527	-0.002797091	0.01543425	-0.00562854	-0.002920314	0.028916491	0.003125449	0.005801287	0.029735371	0.005603401	0.005544965	0.001452625	0.004691691	0.014362376	0.000216842	0.004346646	0.015130065
	107422	0.037694011	0.009102438	-0.008068176	0.045051865	0.012742508	-0.009310135	0.01804574	0.020535361	0.008946368	0.018740658	0.02101608	0.008782977	0.013644231	0.02537084	0.035850402	0.01397716	0.022708189	0.036289498	0.026776565	0.018887775	-0.006311365	0.023620212	0.026043577	-0.006407987	0.029452344	0.038094044	0.016987607	0.025665715	0.044145122	0.016884811	0.024454236	0.043000057	0.028023543	0.020218562	0.045901477	0.028558318
	108121	0.039091744	0.027833924	0.007221099	0.031552322	0.040317412	0.007575596	0.029968405	0.028896857	0.004760741	0.022912359	0.03896223	0.005414615	0.024776876	0.029796777	0.01822475	0.021284696	0.034058832	0.019000381	0.02156176	0.015292826	0.008051139	0.015312084	0.024679247	0.008186834	0.038483858	0.041975483	0.015155349	0.028217018	0.055222802	0.015714493	0.02966403	0.038922198	0.032143787	0.026965642	0.041346364	0.032636892
	108323	0.041260656	0.011642179	0.060382891	0.046680864	0.015210595	0.057808094	-0.007961242	0.009243222	0.05918419	-0.006922862	0.004414204	0.058574431	-0.00737544	0.00472276	0.044713624	-0.006171866	0.000663038	0.044123773	0.067548856	-0.001846939	-0.055162869	0.069843754	0.012842295	-0.055974439	0.014838737	0.03170969	0.056850702	0.012057859	0.031568225	0.057078093	0.008441642	0.033345796	0.094044805	0.006213233	0.03136484	0.093600735
	108525	0.040563364	0.027057348	0.022250334	0.04395546	0.026573274	0.023219293	0.019241655	0.019183187	0.01649775	0.016725745	0.020106379	0.016924856	0.006317625	0.018171949	0.027286055	0.004125545	0.015425152	0.028011607	0.039397378	0.030951979	0.030746706	0.041281048	0.031188009	0.031466056	0.031650219	0.038307995	0.033138204	0.028613841	0.037049904	0.03424079	0.005366357	0.020304665	0.027946955	0.001717395	0.017647509	0.02889386
	108828	0.019636728	0.012730027	0.008924897	0.019811133	0.008837809	0.009331374	0.028375592	0.048293341	0.040598787	0.023152841	0.047744963	0.041378375	0.029986292	0.052306734	0.040491689	0.025111554	0.054132145	0.041037109	0.025455069	0.00730872	0.011996514	0.026706997	0.006777816	0.012066906	0.028695036	0.040372044	0.037521649	0.023263685	0.041120075	0.038169146	0.023432203	0.038435899	0.039223161	0.018536808	0.040855117	0.039592918
	109123	0.0388088	0.025126219	0.023710921	0.040792957	0.027030239	0.024390006	0.024515027	0.033685438	0.029813897	0.023165651	0.031568673	0.031431507	0.027053554	0.04027487	0.037287459	0.026263732	0.03619837	0.038738612	0.036446907	0.011135729	0.001769231	0.0385429	0.01584875	0.001940626	0.027201453	0.044316262	0.036172457	0.025852233	0.042362891	0.038683511	0.008346765	0.046883877	0.038602211	0.006707015	0.039007645	0.039996121
	111312	0.015323245	2.08E-05	-0.023383738	0.015403343	0.00415626	-0.022105193	0.012955002	0.016988106	-0.014292205	0.007950239	0.022767588	-0.012408664	-0.012198725	0.015891341	0.018181769	-0.013259215	0.011909678	0.020261865	0.030465534	0.01068086	-0.023693753	0.027677521	0.019568147	-0.023283854	0.019111697	0.045251861	0.015653804	0.012634104	0.046656106	0.017553521	0.010828626	0.023967715	-0.00046507	0.006601787	0.028116953	-0.000154064
	111413	0.020040583	0.056266144	-0.002023345	0.01767787	0.054613139	-0.001169784	0.006916917	0.034590229	0.022360014	0.002610268	0.032902587	0.023750907	0.018585337	0.020417191	0.016765013	0.021919148	0.016975123	0.017054141	0.035001501	0.046629313	-0.00537137	0.036141176	0.048486739	-0.005143794	0.022040324	0.059216484	0.034018606	0.017644497	0.056182623	0.035504535	0.011760455	0.017131658	0.032250561	0.016776394	0.011010984	0.03161275
	111716	0.056096815	0.019361334	-0.011128857	0.056717966	0.02770059	-0.010958152	0.029801128	0.045105688	0.012766729	0.024182701	0.046454743	0.014395946	-0.009831781	0.023396628	0.02533788	-0.015536911	0.022303347	0.025799587	0.038980473	0.032132	-0.003564368	0.033343811	0.042248126	-0.003829586	0.024698928	0.042817235	0.00349075	0.016802406	0.048861131	0.003996705	-0.022389598	0.017877184	0.023432102	-0.029802373	0.017514789	0.023485262
	113215	0.019782305	-0.007166163	0.013181957	0.021617139	5.09E-05	0.012300667	0.012767725	0.007776542	0.01648117	0.012324957	0.01016637	0.016528901	0.007341137	0.001935338	0.019663161	0.007780678	0.002832603	0.019659219	0.023781167	0.011025718	0.019356145	0.023550313	0.016817883	0.018661298	0.016682744	0.019844458	0.029388588	0.015315153	0.021413475	0.029530434	0.015165761	0.013652487	0.039672595	0.015428866	0.013074447	0.039659269
	113619	0.059011441	0.013003415	-0.051786829	0.054892015	0.037817053	-0.05268896	0.045211278	0.042296436	-0.001629924	0.041972753	0.053014334	-0.001268407	0.023784041	0.056189664	0.072189845	0.02336793	0.051844105	0.072843425	0.052543674	0.017805912	-0.040183581	0.04752687	0.040586699	-0.040762197	0.055591583	0.048622016	-0.002263076	0.051253103	0.065840259	-0.002451609	0.031790301	0.061169412	0.071488328	0.031917404	0.059029106	0.071383812
	113922	0.034144126	-0.012744278	-0.020808779	0.036104862	-0.000205411	-0.021775477	0.011761371	0.026100773	0.045154002	0.010988025	0.023293231	0.046478957	0.006336153	0.020939939	0.042554352	0.006661811	0.015323864	0.04320747	0.017583426	0.030213835	-0.001894087	0.015491904	0.028418239	-0.001296072	0.019821338	0.045261808	0.039808556	0.017916767	0.042622302	0.041356388	0.010327557	0.043254752	0.048512477	0.00850771	0.033320576	0.0488001
	114419	0.071343638	0.040845037	0.015151916	0.076237991	0.046290774	0.015068225	0.047340069	0.054541368	0.023299903	0.04686914	0.056936115	0.023572871	0.041744284	0.022899203	0.021084173	0.046730321	0.023454936	0.020350385	0.023751082	0.04038747	0.022968477	0.019332686	0.04031596	0.023941411	0.014027417	0.055579431	0.018936783	0.005521799	0.05612969	0.020770377	0.004288905	0.0147201	0.027222218	0.001805716	0.010222697	0.027762981
	115320	-0.005126914	0.023363778	-0.071416117	-0.001628093	0.015150541	-0.071044497	0.031611163	0.00678542	0.050394651	0.02741983	0.017187411	0.050944075	0.012634831	0.022293542	0.03485553	0.009449384	0.024788328	0.035684392	0.015214998	0.022382287	-0.034749597	0.016117642	0.022836952	-0.034460746	0.021250153	0.036622386	0.017990064	0.019337695	0.037775539	0.018786982	-0.023439128	0.029470412	-0.05632621	-0.02037161	0.015608936	-0.055973422
	117324	0.046883762	0.017116416	0.018369222	0.054347437	0.02337865	0.016752239	0.032962326	0.029972032	0.020872913	0.033808786	0.032796584	0.02070822	0.021222655	0.022033239	0.01911634	0.022411883	0.023584124	0.018678447	0.054137733	0.015178614	0.022815933	0.063773759	0.022674207	0.020685401	0.044572528	0.046163373	0.034092754	0.043213133	0.049256194	0.034550238	0.031925023	0.041283973	0.038523357	0.028861072	0.043414637	0.038348168
	118528	0.031481784	-0.002941853	-0.030981788	0.024113419	0.016582832	-0.029625634	0.03263694	0.036681321	0.031869959	0.028053036	0.044444866	0.033219561	0.01113258	0.013158144	0.027837444	0.012022367	0.014607495	0.028350584	0.039629333	0.00443578	-0.022650369	0.03454059	0.01859921	-0.02121382	0.014317023	0.026830778	0.02676769	0.010329028	0.030923868	0.026062835	-0.016538309	-0.008571926	0.019520242	-0.009836745	-0.019777268	0.017397547
	118730	0.035786342	-0.000841943	-0.025396261	0.033369396	0.012950708	-0.025986917	0.026120689	0.037672736	0.014731143	0.018152827	0.043507747	0.015201663	0.012927706	0.03230349	0.032552347	0.00798681	0.032441396	0.033121485	0.028979253	-0.006809044	-0.027847443	0.029529925	0.004489064	-0.028361212	0.021169337	0.029247006	-5.23E-05	0.016074905	0.036510665	0.000164802	0.020162106	0.024030833	0.023891959	0.015300609	0.032094203	0.023858212
	118932	0.022803804	0.038641095	0.022092376	0.022175457	0.036103599	0.021920966	0.026953382	0.039279636	0.029037783	0.025581261	0.041259471	0.029025439	0.012466405	0.026444875	0.041453559	0.013554811	0.023745634	0.041832272	0.039756741	0.037442334	0.007750556	0.039466612	0.044882994	0.007461639	0.049406655	0.039265428	0.027994344	0.049105641	0.048637178	0.027518027	0.008157915	0.03712225	0.066185638	0.010951694	0.0280899	0.066188209
	119833	0.010680964	-0.020833829	-0.022666581	0.017827643	-0.019114595	-0.02275835	0.023188211	0.032338418	0.016027654	0.020717504	0.036097821	0.017001428	0.0179202	0.013800363	0.012053062	0.018880498	0.014799169	0.012149617	0.037291076	0.005854779	-0.010266208	0.042669069	0.01183285	-0.010533234	0.011590953	0.000916506	-0.003620895	0.013551872	0.002166067	-0.00344829	-0.003719825	-0.007303094	-0.002553387	0.001485041	-0.014130017	-0.002119503
	120111	0.048521921	0.041292485	0.000574632	0.049666211	0.048018448	0.001873156	0.017727196	0.031957973	0.017894579	0.016779747	0.031314168	0.018981967	-0.004802189	0.003092408	0.024538418	-0.005503613	0.000584844	0.024826992	0.038198542	0.041318238	0.011724371	0.039829873	0.043541867	0.01274579	0.020074842	0.039981596	0.019877654	0.018048892	0.038896762	0.020928537	0.009850185	0.017885294	0.035250824	0.010026793	0.015140795	0.035246201
	120212	0.057074182	0.016256761	-0.006852595	0.057377383	0.025168914	-0.006450726	0.01858093	0.027761968	0.016356373	0.015474315	0.025606956	0.017842954	3.88E-05	0.015037245	0.025715677	-0.000327096	0.008704029	0.02665282	0.052133538	0.011685254	-0.00881635	0.051278207	0.02353451	-0.007653126	0.029842606	0.020869892	-0.002161433	0.022552922	0.030268153	-0.002048661	-0.006700823	-0.000424431	0.025224842	-0.009861066	0.000349421	0.025457812
	120515	0.036472544	0.026692333	0.019557903	0.033184014	0.032726642	0.020588636	0.01702242	0.048349481	0.039212964	0.0105187	0.048061617	0.040842827	0.016210508	0.035869159	0.033070087	0.01156345	0.036211364	0.034302205	0.039028358	0.026176218	0.020834053	0.035705257	0.034066677	0.021898739	0.027356645	0.0340496	0.042816196	0.02219349	0.040938631	0.04353888	0.012131214	0.027899796	0.027793372	0.008717773	0.030772142	0.028782746
	121618	0.025175106	-0.01348186	-0.017602757	0.028258763	-0.006682803	-0.017677315	0.017245211	0.03191388	0.025396913	0.013562806	0.034778591	0.026606496	0.009589535	0.022892084	0.023632949	0.008179446	0.023636801	0.024339184	0.037989672	0.003895929	-0.003170149	0.038532168	0.013232573	-0.002868758	0.031005114	0.054416459	0.041862998	0.025369242	0.063313343	0.043148968	0.010275781	0.032071061	0.039613165	0.008111184	0.0329661	0.040225774
	122317	0.050672807	0.023198459	0.018049829	0.054812465	0.028622355	0.017961007	0.027554186	0.031909473	0.022923071	0.026799966	0.033559121	0.023694178	0.018517314	0.022611093	0.026036456	0.019370053	0.021461671	0.026655089	0.06722787	0.021291563	0.00682394	0.071252592	0.030690063	0.006071331	0.048254583	0.037481956	0.017253185	0.048623271	0.042049777	0.017378369	0.040361587	0.020676138	0.015484287	0.043765694	0.021475971	0.015051162
	122620	0.046874147	0.007904228	-0.016932691	0.04449784	0.020532381	-0.017871024	0.038492609	0.044053592	0.02169607	0.033041414	0.048037846	0.02232305	0.023903139	0.044639006	0.041302644	0.020258211	0.045876794	0.042342104	0.050811995	0.027547732	0.002668053	0.046938889	0.034669604	0.001255515	0.054460984	0.057402696	0.020052072	0.045541596	0.069617197	0.019905515	0.016410299	0.046906166	0.044902071	0.013635971	0.043042079	0.045447268
	124422	0.040490922	0.024337532	-0.027591892	0.041225694	0.032053359	-0.027581334	0.032641657	0.05066948	0.058397457	0.028172094	0.049579922	0.058181468	0.02392159	0.036524199	0.064979509	0.019675884	0.036321227	0.064967714	0.053155869	0.038907494	0.012771592	0.051229838	0.048131067	0.01253995	0.04118792	0.072011329	0.071570642	0.033497609	0.072885267	0.070444562	0.039757308	0.073317572	0.084618419	0.032669652	0.073182456	0.083742559
	124826	0.05398614	-0.005501133	-0.025280802	0.05316364	0.015802661	-0.024874324	0.03460924	0.061972938	0.01180108	0.027854631	0.071744584	0.012951514	0.003899313	0.032180231	0.036570605	0.004371983	0.023377514	0.036723431	0.041157831	0.010375457	-0.021328693	0.041948989	0.02607896	-0.021783603	0.042542811	0.041785516	-0.006256753	0.038304321	0.059628777	-0.005742022	0.016103007	0.033350356	0.025289869	0.017129213	0.027778551	0.024510508
	125525	0.028789885	0.020832751	-0.006214748	0.029080734	0.025467947	-0.005290587	0.016330913	0.010631205	0.007820156	0.014844665	0.016015496	0.009036992	0.001665009	0.016877342	0.014501983	-0.002015018	0.017520091	0.014568373	0.038749672	0.017866559	0.002036347	0.039385609	0.019456696	0.002486615	0.02521188	0.01098133	0.008744479	0.023344574	0.01117534	0.009295532	0.002594327	0.009024712	0.019167757	-0.000701287	0.004519098	0.018647319
	126325	0.049071044	-0.000318186	-0.019873505	0.048873674	0.017861936	-0.019939188	0.035268422	0.022740306	0.005549377	0.0339416	0.030283006	0.006155077	0.012142133	0.024204681	0.02099653	0.011316605	0.022984562	0.022168959	0.046076275	0.00436572	-0.011806285	0.04793448	0.016333779	-0.012214931	0.054212235	0.043956377	0.01175054	0.050540939	0.054268967	0.012087905	0.015863465	0.046309065	0.033951268	0.014838249	0.039557364	0.03476629
	127630	0.031640194	0.041357175	0.008249272	0.025691757	0.047653828	0.009996543	0.017237183	0.023223216	0.018876372	0.016911646	0.023353843	0.019908519	0.016117256	0.025953952	0.02575572	0.014482752	0.02667037	0.02670238	0.03311412	0.025522079	-0.003605174	0.035296459	0.028726147	-0.002885096	0.022133267	0.02228744	0.008567407	0.026527375	0.020445136	0.009300163	0.015065477	0.009926529	0.021189483	0.021567665	0.005348783	0.021581663
	127933	0.037749562	0.031429905	0.006882621	0.033621117	0.050053835	0.007029396	0.010698744	0.041254796	0.044415765	0.006753927	0.037523095	0.046181299	0.002631604	0.021199645	0.032973532	0.003183826	0.014490076	0.033115622	0.044964306	0.046157416	0.011542128	0.040223658	0.0617816	0.011354162	0.029449383	0.071162902	0.04397421	0.023553535	0.070085503	0.045206662	0.003683158	0.032782391	0.035548955	0.004676319	0.022586374	0.035908993
	128127	0.066096447	0.067509435	0.005092196	0.060852535	0.081392281	0.00647523	0.010181844	0.046127636	0.03649909	0.00588985	0.040268507	0.037829172	-0.00335429	-0.003007019	0.017527416	-0.002323602	-0.007374151	0.017991059	0.052215204	0.036580358	-0.001166742	0.048702937	0.050209474	-0.000861707	0.048511904	0.086877972	0.027774367	0.039220039	0.091828473	0.029522151	0.002842396	0.025451804	0.050601311	0.001979955	0.018788015	0.052329436
	129028	0.057404958	0.047095127	0.002839222	0.051337365	0.058921155	0.003634336	0.031743251	0.050813194	0.022621199	0.023439957	0.056587208	0.023292851	0.017453209	0.03571989	0.032255549	0.013166196	0.035786618	0.033187956	0.062056523	0.049012706	0.00155466	0.052474059	0.064397335	0.001576509	0.046339083	0.068239167	0.030208893	0.034372374	0.078885667	0.0309582	0.021562194	0.058653474	0.057938855	0.015644632	0.055837404	0.059480593
	130013	-0.00276918	-0.070214376	-0.015956767	-0.003727429	-0.051643826	-0.01713364	0.005719421	0.030172946	0.003089555	-0.000415152	0.028857214	0.005502322	0.003320243	0.044093184	0.0271743	-0.000284736	0.039097577	0.030165959	0.023718739	0.012455277	-0.006739079	0.016912611	0.024752295	-0.003498943	0.011221064	0.02244694	-0.000368404	0.00117575	0.030092534	0.003198301	0.005477966	0.00691773	0.011903062	-0.005168985	0.018157272	0.014490155
	130316	-0.002028219	0.003812039	-0.015187455	-0.007627002	0.011653104	-0.013673567	-0.001143178	0.018605951	-0.00523054	-0.008953884	0.025204033	-0.003691896	-0.00059877	0.01545738	0.01761445	-0.005622216	0.017945047	0.018661832	0.022058357	0.033708144	0.010521846	0.019658089	0.037586294	0.011986802	-0.022152383	0.036727101	0.013581398	-0.02733263	0.028870631	0.015510647	0.031121491	0.031050934	0.052478332	0.035302069	0.025208952	0.051725879
	130922	0.033457544	-0.007472587	-0.026662856	0.029421538	0.012826294	-0.026898021	0.020512186	0.031637941	0.01445564	0.01668714	0.036232986	0.014737439	0.013626083	0.028651504	0.024963837	0.013960168	0.026702944	0.02504516	0.051780842	0.006680098	-0.008332869	0.043952022	0.032828648	-0.008847474	0.043140393	0.060858283	0.02475288	0.035793498	0.072022766	0.025605865	-0.005448596	0.038055319	0.035653755	-0.002042852	0.027542114	0.035706043
	131217	0.042486507	-0.033958625	-0.029329544	0.053306188	-0.025213821	-0.030658314	0.015849909	0.039351467	0.023391021	0.008265315	0.04602376	0.023894906	0.010437018	0.048935983	0.05238786	0.003381517	0.048616175	0.054570533	0.030961419	-0.019077338	-0.020053415	0.036753822	-0.012444632	-0.02080939	0.012971953	0.025361998	0.010432704	0.003943621	0.033918835	0.010888135	-0.006620716	0.038447384	0.050702915	-0.016289404	0.039217375	0.052590363
	131722	0.056712281	0.005851809	-0.016385389	0.054470915	0.021317516	-0.016106948	0.013674203	0.029459352	0.015269431	0.008293891	0.032380622	0.016316926	0.013648151	0.028787913	0.0117369	0.009402849	0.030917097	0.012639529	0.005632904	-0.000240315	0.0023815	-0.002492084	0.009954392	0.002354768	0.02163158	0.018110411	0.021428896	0.020835385	0.01876336	0.021360189	0.014082205	0.020166181	0.030184569	0.015264405	0.015555843	0.030502416
	131924	0.039409004	0.003447141	-0.016901214	0.040167321	0.017608615	-0.018017018	0.015609262	0.028698303	0.019542787	0.011059937	0.032985467	0.019404085	0.005404141	0.021915115	0.022890648	0.002876415	0.020153832	0.022975067	0.052761775	0.007093133	-0.008815424	0.048200924	0.033161342	-0.010222752	0.041924153	0.036875892	0.019391686	0.033355691	0.055560365	0.018349955	0.015473786	0.040596224	0.038671985	0.013466218	0.035106979	0.039139256
	133019	0.040853482	0.013702116	0.030274551	0.042555481	0.020950973	0.030105017	0.027274866	0.020892024	0.022417769	0.025584184	0.026772235	0.022555176	0.023326043	0.015026896	0.02394376	0.02237957	0.02013601	0.023783427	0.047015034	0.022806237	0.037895646	0.048286401	0.029866144	0.037780177	0.043526143	0.030650556	0.030321948	0.040805466	0.040527668	0.030425606	0.03510692	0.023016678	0.03489254	0.034051307	0.030060129	0.035025772
	133625	0.062732466	0.056048136	0.008523817	0.060228091	0.065029517	0.008750518	0.014505737	0.043044973	0.009124068	0.009734606	0.041609768	0.009967982	0.004119944	0.029365152	0.030896412	0.000956665	0.025241964	0.031542566	0.060389604	0.044778425	0.000834301	0.058607299	0.054991063	0.000464701	0.037288159	0.088503957	0.012264924	0.03114639	0.089257449	0.013021666	0.010487464	0.053610969	0.040776581	0.008396714	0.047646053	0.041235562
	133827	0.070615426	-0.006507691	-0.00234536	0.084532544	0.001550558	-0.004756868	0.045265168	0.00532442	0.007660138	0.055602498	0.006007781	0.00598339	0.037622124	0.002687444	0.010490471	0.047320366	0.001941608	0.008816086	0.045934953	0.004354478	-0.003682673	0.050580729	0.014524383	-0.003880809	0.034062091	0.02450211	0.009531662	0.034511417	0.031194299	0.010494337	0.037892386	0.016439216	0.010708893	0.041176181	0.022599574	0.011184945
	133928	0.057018828	0.030253623	0.028482972	0.059681874	0.036714297	0.028690025	0.02422801	0.019156717	0.01780168	0.026650188	0.019612113	0.017488742	0.029758016	0.019246271	0.019918766	0.032573994	0.020335276	0.019545877	0.043193862	0.02377107	0.024388067	0.04595634	0.028221589	0.023991199	0.02424263	0.018190218	0.017716745	0.026760133	0.018847363	0.01697696	0.025733382	0.015125435	0.01717806	0.028356085	0.016532931	0.016619068
	135225	0.058270004	0.063791238	0.030156396	0.055800874	0.068195991	0.031235423	0.033667732	0.061028421	0.040397909	0.029969903	0.054433051	0.042334341	0.023919664	0.052483965	0.04356084	0.021495245	0.043454681	0.045218728	0.053435333	0.061229851	0.021128194	0.049524449	0.067517065	0.02229142	0.055043351	0.082828782	0.042377058	0.048040848	0.084413759	0.04455021	0.034613632	0.083458871	0.052670583	0.028616125	0.073965572	0.055278327
	135528	0.015590778	0.026806701	0.016816366	0.008251022	0.03963447	0.015884582	0.015501883	0.040722456	0.006013564	0.010933915	0.04319641	0.006515113	0.013326405	0.023424977	0.016277283	0.012258939	0.021197084	0.016880587	0.030357767	0.049309477	0.010520826	0.025934661	0.058456406	0.010590722	0.043019846	0.089716792	0.015871273	0.03483111	0.097568735	0.016667321	0.012713348	0.041240215	0.041625593	0.007251412	0.042722076	0.042623281
	135932	0.029982761	-0.003211511	0.008918791	0.032887984	-0.001230928	0.008862399	0.011416346	0.007180913	0.017560575	0.01301017	0.003542412	0.018134156	0.009829747	0.006438358	0.020039253	0.011381696	0.002332444	0.020468118	0.024757877	0.001698651	0.016664419	0.026527638	0.00246624	0.016452659	0.015054183	0.021056661	0.028096968	0.01654247	0.014306894	0.028774595	-0.003467761	-0.002681721	0.025851551	-0.000897576	-0.010817506	0.026266262
	136227	0.049963906	-0.007224399	-0.011108764	0.05424118	0.003626304	-0.010843107	0.027517125	0.034687158	0.025327858	0.017328616	0.044795595	0.026431363	0.007247385	0.024566306	0.029140072	0.001684391	0.024885869	0.029664913	0.045443814	9.43E-05	-0.01512472	0.048624463	0.009916393	-0.014930841	0.033496406	0.026998308	-0.001079527	0.025299879	0.038027477	-0.000610983	0.00104506	0.021410838	0.038263947	-0.002890156	0.019125916	0.03895738
	136833	0.024598174	0.00091834	0.013431566	0.031996172	0.00416751	0.012111836	0.027081748	0.040907808	0.052405223	0.027398581	0.039836414	0.053090356	0.010647281	0.03703735	0.04883334	0.010215913	0.032302234	0.049401768	0.020691868	-0.003603062	-0.006781102	0.026420718	-0.001738863	-0.007153874	0.02671708	0.02197817	0.003385535	0.028272942	0.021156626	0.003769596	0.014578771	0.01106196	-0.000574626	0.016185462	0.009561113	-0.000249706
	137633	0.05724727	0.008795405	0.0006815	0.055570412	0.026278354	-0.000156296	0.041643344	0.030795518	0.020727379	0.038520798	0.041532628	0.021208437	0.028410135	0.040997688	0.046764571	0.025144793	0.044991665	0.04731518	0.064490817	0.025962191	0.006664375	0.060900375	0.045894809	0.006608611	0.061673272	0.043910202	0.026580967	0.055079203	0.062631331	0.027485156	0.031582516	0.049037255	0.051856458	0.025020128	0.057012346	0.052944466
	138231	0.089058682	0.00523971	0.047150932	0.099782929	0.004368566	0.046667024	0.031049138	0.024787525	0.0150592	0.027004782	0.03102296	0.01534728	-0.012436502	0.018258106	0.011050021	-0.017324366	0.020470794	0.011729596	0.016019227	0.035755862	0.027108146	0.011776841	0.054547723	0.026960988	0.049311753	0.042322338	0.043217231	0.047747124	0.056165088	0.043420598	-0.033484764	0.031736426	-0.001079564	-0.044466533	0.041426491	-0.000872903
	138534	0.067652926	-0.003846484	-0.002516531	0.076867037	0.005648449	-0.003926348	0.043483116	0.015836503	0.021145703	0.048188966	0.018422037	0.021089152	0.032776803	0.015430042	0.024488769	0.036302876	0.015766008	0.024625618	0.080574296	0.031229019	0.006820053	0.092567861	0.034555502	0.005781207	0.039117415	0.102589749	0.043581128	0.03565437	0.09026631	0.044934455	0.039905347	0.059396788	0.038077407	0.043151926	0.050246853	0.038909152
	139637	0.034798019	-0.009221148	-0.016133772	0.041286614	-0.007882918	-0.016947763	0.031598929	0.032665186	0.006476937	0.02754942	0.036310799	0.007099227	0.023468172	0.024323789	0.010803037	0.021113645	0.027079424	0.011626421	0.045154434	0.008803288	-0.000923788	0.051310405	0.010710056	-0.001398557	0.050477136	0.052893836	0.012987707	0.042584717	0.062008467	0.013506992	0.024444552	0.039063074	0.024295971	0.022048876	0.041430846	0.024830915
	140117	0.040515199	0.031842683	0.003074175	0.033661123	0.04124473	0.004683347	0.027017683	0.045313582	0.018579457	0.01800615	0.051528174	0.020656079	0.007998231	0.029620448	0.03910128	0.004018927	0.029297469	0.040924959	0.055468176	0.041524824	0.008927609	0.046659674	0.053896412	0.010423183	0.048413768	0.0607193	0.023804598	0.036019135	0.072111122	0.025872882	0.016872572	0.053989362	0.075689152	0.008501872	0.0569872	0.078161672
	140420	0.040596716	0.040295556	0.030837569	0.038528878	0.045830369	0.030706143	0.025777336	0.027112354	0.024283616	0.02563102	0.029804228	0.024017597	0.019058615	0.020266358	0.020025186	0.019052023	0.021240167	0.020116488	0.042635351	0.046506103	0.007544366	0.042389192	0.049293615	0.00708425	0.041025501	0.042969607	0.008883983	0.042032268	0.044566769	0.008803328	0.034876864	0.031330269	0.028784793	0.035487808	0.032964893	0.029324517
	140925	0.056735706	0.048628028	0.029675953	0.051076941	0.058137249	0.031393714	0.031002581	0.032332934	0.026576979	0.030162374	0.032807585	0.026698655	0.026202101	0.02955793	0.028155368	0.026331551	0.028936883	0.027869193	0.066989794	0.053359352	0.032307725	0.061159354	0.067022093	0.033445075	0.037316699	0.041790646	0.032519288	0.035582162	0.043751277	0.032441322	0.035716869	0.040637799	0.038136985	0.034168094	0.043213408	0.037784684
	141422	0.049066309	0.041242454	0.009554503	0.047506187	0.049969036	0.009666002	0.027972359	0.04407461	0.022469353	0.024743536	0.049010731	0.023412675	0.0185003	0.040131938	0.031582426	0.016127178	0.041068427	0.032346815	0.041205827	0.039080661	0.013163825	0.038530428	0.047402952	0.013674798	0.03810006	0.051653974	0.020990312	0.034284774	0.061106678	0.022025639	0.018575914	0.049675576	0.039938189	0.013839038	0.051026653	0.041645464
	141826	0.02734472	0.017759643	-0.022815611	0.021254407	0.029256508	-0.021697115	0.015277333	0.045481432	0.005303299	0.008218109	0.048832711	0.007127057	-0.01105999	0.024219204	0.029337151	-0.012437941	0.017526595	0.030481704	0.017294219	0.021472035	-0.013195249	0.008673019	0.033588469	-0.011748424	0.014968286	0.051816788	0.008385637	0.005980157	0.059480906	0.009701327	-0.001959511	0.041131102	0.035433281	-0.005237507	0.037448611	0.03626341
	144226	0.021303479	0.008484827	-0.013808537	0.014433399	0.019604929	-0.013625028	0.020760575	0.024102477	0.005625507	0.015132354	0.029118206	0.006319454	0.004290264	0.015005762	0.017656911	0.000316459	0.015430161	0.018341847	0.022643385	0.002357368	0.003263435	0.023461066	0.004113959	0.003143454	0.021021694	0.026073324	0.00760238	0.014325456	0.032120828	0.00805873	0.028170448	0.025906527	0.019707523	0.029385738	0.022596871	0.019762317
	144832	0.044721242	-0.008558447	-0.008428626	0.047156531	0.005715122	-0.008647438	0.011206008	0.041532401	0.018914528	0.004678461	0.040429339	0.019599069	-0.004100373	0.02373624	0.025751051	-0.005687743	0.01604625	0.025844544	0.039961301	-0.004499098	-0.002176037	0.042908035	0.001801765	-0.002893373	0.038344573	0.056540847	0.02888022	0.030836841	0.06081352	0.02952962	0.002754517	0.019701419	0.030582022	0.000989727	0.016715256	0.030603416
	145834	0.033190679	0.003258314	-0.03036592	0.032788556	0.013557094	-0.030150807	0.025231298	0.05579428	0.045689773	0.020981645	0.05455184	0.04601796	0.011820271	0.028100748	0.030335266	0.010040726	0.02707701	0.030582912	0.051567659	0.041577775	0.017548406	0.049067929	0.050085884	0.017653348	0.026661845	0.070003204	0.041093208	0.023065582	0.067738473	0.041997336	0.001144031	0.037131816	0.059433147	-0.000939484	0.031422578	0.060030844
	147737	0.050695699	0.059243891	0.019422924	0.041100241	0.070411339	0.020914786	0.019382201	0.030825133	0.015924064	0.01206817	0.037003383	0.016560646	-0.000193042	0.011881902	0.020307085	-0.003288528	0.012474881	0.020623738	0.060379364	0.055944722	0.011421293	0.049951982	0.07159353	0.012084604	0.027969081	0.037841626	0.010006144	0.02008187	0.046121709	0.010743339	0.008211042	0.031338848	0.04376781	0.004299223	0.030554643	0.04484776
	148032	0.066283174	0.042419117	0.015765222	0.065311491	0.052258831	0.016090347	0.032628346	0.047820121	0.017155001	0.028409829	0.051235635	0.018329483	0.013838714	0.041921917	0.0246146	0.009756309	0.04352906	0.025971187	0.097687319	0.058899485	0.02633105	0.094085068	0.076677553	0.026333632	0.075555347	0.06799832	0.015347957	0.069626063	0.081566796	0.015902957	0.012737134	0.03168853	0.023243206	0.011739735	0.033072706	0.023675261
	148335	-0.027121762	-0.016069945	-0.009286427	-0.029143149	-0.024331804	-0.008211003	0.049058225	0.032280248	0.001263499	0.051276688	0.040474948	0.000705814	0.025686784	0.023207372	0.021738354	0.027705627	0.025413867	0.021458233	0.031638213	-0.000126582	-0.021469705	0.03507198	0.010236176	-0.021529112	0.04376005	0.039845165	0.001830598	0.043066345	0.045388456	0.002451331	0.052762557	0.027072867	0.017510604	0.056083627	0.036293034	0.017406275
	148840	0.041441079	0.007356862	0.00854744	0.041096404	0.008696495	0.008458892	0.035698622	0.037175771	0.012084449	0.031609669	0.039829955	0.012667738	0.013166518	0.025123512	0.02515885	0.012289976	0.02224455	0.02576733	0.038770363	5.90E-05	0.006750619	0.041549657	0.002191061	0.006174074	0.033394307	0.040334474	0.025523877	0.031416405	0.037868936	0.026128331	0.004652898	0.009667562	0.024955746	0.004407555	0.003444111	0.025836406
	148941	0.045086514	0.043400608	0.022523846	0.038183168	0.05979567	0.0233432	0.033952821	0.039517991	0.030341094	0.027949234	0.05047163	0.031178454	0.015077323	0.009598644	0.023301156	0.015051505	0.011475167	0.023489561	0.028059822	0.038613692	0.015794393	0.022602072	0.048640627	0.016724119	0.008320211	0.032904286	0.006479614	0.002319687	0.040582094	0.006756179	0.006194448	0.025278153	0.029200548	0.004908122	0.026975745	0.029932689
	149337	0.038264014	0.02175845	-0.001189581	0.03494072	0.031067215	0.000272433	0.006899202	0.030833893	0.009356242	0.001483813	0.035572574	0.010518439	-0.004282665	0.020644488	0.026494527	-0.004746614	0.018371547	0.026992861	0.037089411	0.010698195	-0.010576878	0.031696297	0.024156764	-0.009591855	0.014394826	0.043017522	0.001853909	0.009444322	0.04901427	0.003697272	0.006580997	0.017213292	0.017884094	0.001714912	0.025852345	0.018163966
	149539	0.034202233	0.057020709	0.007023727	0.033514258	0.052076623	0.006826088	0.04022548	0.044572398	0.014349575	0.037383761	0.049055938	0.014291862	0.01837842	0.033066884	0.029718535	0.016600965	0.031306546	0.030616885	0.023061294	0.011835969	0.020760952	0.026426429	0.01047187	0.021814631	0.063884661	0.060218804	0.022087686	0.06039926	0.06797003	0.022118948	0.030532369	0.039041013	0.018954067	0.028277721	0.039943356	0.018468259
	150726	0.057100285	0.069579974	0.02883737	0.056956619	0.072800033	0.029739801	0.019210869	0.042881079	0.010212181	0.015712164	0.043930277	0.011219319	0.012908448	0.022503203	0.015957026	0.012607318	0.023433503	0.016923757	0.067232758	0.061669361	0.027064929	0.067303255	0.065582372	0.027536046	0.033211824	0.042647395	0.005293624	0.029298119	0.048182819	0.006371823	0.021433854	0.033629712	0.03862017	0.021958871	0.033467904	0.040015548
	151627	0.048096001	0.017468905	-0.012144791	0.045020096	0.032581389	-0.011769918	0.026275083	0.031724967	0.002515644	0.020184174	0.038627081	0.003175588	-9.77E-06	0.026325654	0.022808542	-0.002587947	0.02184624	0.023511291	0.050391499	0.016085614	-0.002794018	0.047607724	0.031980146	-0.002130901	0.033788417	0.029949903	-0.013640926	0.024212759	0.044155158	-0.013103136	0.01501932	0.029483091	0.027279722	0.011867051	0.030304387	0.028214801
	152831	0.047872048	0.022760384	0.007041657	0.052815624	0.025551377	0.007427139	0.017785501	0.022593472	0.00121952	0.019608157	0.018088803	0.002357891	0.021396641	0.020706477	0.021597046	0.025006616	0.016871527	0.021967476	0.054467194	0.040924806	0.014943439	0.052156042	0.049766008	0.014803991	0.036207803	0.05477798	0.048289776	0.030712925	0.058418188	0.048723485	0.022340491	0.017053477	0.032422949	0.024025122	0.017794421	0.033226982
	153025	0.079388313	-0.002293485	-0.035002492	0.082151562	0.016762907	-0.035826046	0.052178767	0.01972262	-0.002124591	0.050996546	0.03080963	-0.002037223	0.027555868	0.014410505	0.024954557	0.029005902	0.015628919	0.025006693	0.036843192	0.027999824	-0.005303734	0.030812263	0.040561322	-0.005494965	0.034112491	0.048042864	0.016691387	0.024906861	0.059399031	0.017354254	0.024029095	0.024513002	0.041184828	0.024820661	0.022716757	0.041976813
	153429	0.024320548	0.014410871	-0.025384028	0.020591622	0.019593384	-0.024030151	0.02959823	0.034858789	0.020886613	0.026256682	0.038951203	0.022192828	-0.004706957	0.03690061	0.034397449	-0.00712075	0.029964084	0.03570902	0.004135918	0.009521353	-0.018530693	-0.001110396	0.012683373	-0.017408926	-0.016052265	0.052400656	-0.000734996	-0.023713915	0.044527009	0.001102115	-0.018818822	0.031889651	0.002989238	-0.023207035	0.024196506	0.004244109
	154431	0.052413255	0.000816839	-0.036681097	0.053417996	0.011394781	-0.037701301	0.03186395	0.024024276	0.009506878	0.030447094	0.028465457	0.009045072	0.024849668	0.01594675	0.001317036	0.023473455	0.019631909	0.001040211	0.066007085	0.024407519	0.016825372	0.062729806	0.038957518	0.015694685	-0.000395259	0.015479707	-0.046298858	0.003408083	0.00157879	-0.046200618	0.000777599	0.03570722	0.0069224	-0.000708459	0.025258856	0.007707976
	154734	0.023168352	0.035043977	0.014479915	0.024307692	0.037530869	0.015188828	0.024094479	0.03399324	0.015845848	0.025329595	0.035496421	0.016679816	0.023290737	0.028927609	0.022743909	0.026194628	0.028247105	0.023330156	0.056662969	0.044091392	0.038966749	0.062647074	0.04969706	0.039193112	0.054571453	0.047022831	0.041666303	0.058834009	0.051941868	0.041920722	0.03239879	0.045286097	0.040181026	0.033615965	0.047157075	0.040838581
	154835	0.052713268	0.031258076	0.00673349	0.052916046	0.042312499	0.007326738	0.022631533	0.03365792	0.016811753	0.020212729	0.037013799	0.017419608	0.006903123	0.034932971	0.03175031	0.002976322	0.033801813	0.032809865	0.050159764	0.032896563	0.017689791	0.052042052	0.037572764	0.017911429	0.05020877	0.047197044	0.021295112	0.049062964	0.053806178	0.022235343	0.029899988	0.055051241	0.044692308	0.02616486	0.05656879	0.046040867
	154936	0.065547734	0.020309916	-0.032098204	0.063206576	0.041786484	-0.032531373	0.029323857	0.042477854	0.001940972	0.025611524	0.052438442	0.002632153	-0.00584088	0.029771581	0.022166615	-0.003579495	0.021011401	0.022035118	0.041834474	0.036652658	-0.024337316	0.036351848	0.053455532	-0.024996364	0.038396645	0.057702649	0.007382893	0.028941056	0.07207635	0.008891487	-0.003387513	0.051154479	0.043939948	-0.006204578	0.042556677	0.044830799
	155231	0.021515604	0.005342331	-0.001385178	0.0212151	0.014484064	-0.001409122	0.045503799	0.052126069	0.011427813	0.038463742	0.061085358	0.01243725	0.022256961	0.036446251	0.019710412	0.018564846	0.037731245	0.019801231	0.067019477	0.057085168	0.022513671	0.063624822	0.067737751	0.023015076	0.043872084	0.062801085	0.02029413	0.036321599	0.068311349	0.021491075	0.003225257	0.026871771	0.018138211	0.004265584	0.019990599	0.01759558
	155635	0.033711847	0.021740777	-0.022274503	0.032531641	0.031037668	-0.021581445	0.020296108	0.02900734	0.000473341	0.017360812	0.031821966	0.001177724	-0.001374938	0.004044284	0.016584311	-0.00249868	0.003719119	0.016740724	0.032899939	0.026115978	-0.010763336	0.030781886	0.036667604	-0.009784936	0.034998648	0.042116899	0.024173388	0.027717678	0.05149423	0.024627857	-0.007756926	0.005767136	0.030496227	-0.006551006	0.00126932	0.031063698
	156637	0.04069566	0.004988465	-0.007012767	0.04419468	0.012991281	-0.00693568	0.03705579	0.019321768	0.012846776	0.037147854	0.0276458	0.013923559	0.028347267	0.011078148	0.006668783	0.030443527	0.017007891	0.006716162	0.021030448	0.006067438	-0.014701805	0.022189099	0.009745426	-0.014136823	0.028627239	0.01624996	-0.008967348	0.022331882	0.025368553	-0.007924564	0.00801794	0.015165951	0.011716168	-0.001001099	0.023691319	0.012672595
	157336	0.043117169	0.028244143	-0.005077431	0.043468513	0.033498853	-0.004955509	0.024131218	0.055305973	0.015627909	0.019335574	0.054594237	0.017170956	0.004484138	0.016781444	0.023613706	0.004634	0.013443793	0.023667946	0.045180768	0.037711151	-0.002410748	0.044994172	0.04298367	-0.002365904	0.017892474	0.058892526	0.020223476	0.012507293	0.060132086	0.021538446	0.007099043	0.037426643	0.026888551	0.005532106	0.03470378	0.027026489
	157437	0.011879407	0.042284228	0.003283706	0.013260081	0.031584911	0.00296094	0.00944908	0.038310349	0.010709139	0.009334382	0.029393757	0.010967009	0.009441686	0.036298677	0.015902981	0.009244883	0.028277528	0.016325595	0.006885411	0.040224764	0.01189325	0.009398298	0.031487085	0.012143834	-0.005769393	0.032924358	0.014607882	-0.002786517	0.020068588	0.014389494	0.012359288	0.041523866	0.029941587	0.012989142	0.034060981	0.030852087
	158035	0.043171857	-0.005644055	-0.00646806	0.04933143	0.001087444	-0.007900133	0.034874093	0.037452828	0.018204316	0.029720251	0.047209524	0.018520655	0.018231377	0.02749896	0.027674312	0.01433665	0.032153286	0.028051158	0.058280967	0.021247869	0.004315588	0.063492998	0.031189611	0.002829462	0.057114337	0.053148326	0.033958282	0.050696187	0.06745737	0.033791546	0.021401133	0.033031341	0.036220968	0.018693177	0.036028616	0.036159325
	158136	0.003489968	0.040071215	0.000991738	-0.003690224	0.042043798	0.002020058	0.00674765	0.036678292	0.009743985	0.001976758	0.037775084	0.010574523	0.008955121	0.031872638	0.018857233	0.006019033	0.031184116	0.019537063	0.02495358	0.026029665	0.005872845	0.01779783	0.038343295	0.006601747	0.03500494	0.049842525	0.023078924	0.029101463	0.058036163	0.023193223	0.014573884	0.012896085	0.022118006	0.013781164	0.014200271	0.022000074
	158540	0.03362808	0.009400737	0.014309715	0.034221251	0.012462455	0.014424826	0.010912508	0.019873291	0.023137104	0.011562785	0.016181571	0.022792308	0.003674379	0.020474812	0.030110136	0.004889811	0.013453156	0.029780926	0.034348108	0.013622406	0.021951934	0.038905784	0.012631444	0.02118347	0.016027007	0.027310874	0.027761703	0.014923508	0.025621677	0.027654557	0.011139572	0.035912372	0.033284377	0.00922155	0.031466663	0.033746943
	159138	0.023179717	0.030503521	-0.009630687	0.015045474	0.037463039	-0.00884497	0.039804604	0.058020834	0.000528726	0.028369663	0.065621331	0.00172421	0.003625762	0.003345337	0.022186223	0.009019514	-0.003929681	0.022147425	0.08213865	0.037095055	-0.01780938	0.080452524	0.053319208	-0.017450036	0.072538957	0.026473327	0.009475265	0.076123774	0.036527809	0.009298603	0.047715101	-0.004750761	0.020526171	0.059738122	-0.002338849	0.019970093
	159239	0.033005878	0.018650385	0.002709749	0.031666894	0.024540868	0.002937502	0.011746719	0.028225837	0.003292699	0.008816053	0.027698446	0.003435435	0.004845682	0.024031652	0.020781517	0.003231524	0.022311261	0.021051897	0.025278401	0.031007897	0.001409905	0.024691712	0.03353646	0.000913706	0.018922914	0.030238336	-0.001042337	0.015736502	0.034245819	-0.000821281	0.00756287	0.032870427	0.012151396	0.004913003	0.031744424	0.012119588
	159340	0.02984409	-0.008837067	-0.009868053	0.030056188	0.005344435	-0.010200044	0.018663675	0.014517711	0.016832443	0.017366085	0.017369652	0.017301492	0.008129007	0.016935144	0.019864282	0.007623283	0.014025779	0.020438243	0.045632523	0.023320187	-0.011971262	0.044286344	0.036378328	-0.011737566	0.034145288	0.028683137	0.006894159	0.032120571	0.034768675	0.007557497	-0.00038874	-0.008671977	0.003190827	0.002642401	-0.008783105	0.002915748
	160123	0.022678018	-0.02561863	-0.022407249	0.024885522	-0.010780314	-0.022693755	0.012180604	0.030104985	0.017378435	0.011186471	0.026313456	0.017709972	0.009210136	0.032023836	0.029325807	0.008952011	0.025830824	0.029707532	0.032558408	0.042875137	0.022835324	0.031220419	0.040811718	0.023053275	0.026862213	0.058964524	0.036306392	0.024257196	0.050788153	0.036301643	0.016806599	0.047951143	0.041295692	0.015830496	0.038605642	0.041483566
	161327	0.025631391	0.007111204	0.023353703	0.025659433	0.011852457	0.022656659	0.029999273	0.020069428	0.031960893	0.029208537	0.023929587	0.031404264	0.020897767	0.01130741	0.028965456	0.019759649	0.015269643	0.028021315	0.003404909	0.013704152	-0.001864764	0.00406538	0.010358717	-0.000423787	-0.004938347	0.020895274	0.006923552	-0.004822074	0.013800124	0.008004858	0.000708196	0.011420599	0.017675262	-0.000312933	0.010460713	0.017225007
	161630	0.049719628	-0.002340724	-0.01007547	0.042920433	0.014101226	-0.009967244	0.033580769	0.039185751	0.028150165	0.029235786	0.039906282	0.029164147	0.01331855	0.034414284	0.040041596	0.013327647	0.027698936	0.040481236	0.042004243	-0.00031254	-0.006345456	0.037037641	0.012782353	-0.006098939	0.04024557	0.051387031	0.024060819	0.034522068	0.05791913	0.025315173	0.006656593	0.029043391	0.033417374	0.007296558	0.023307078	0.033624109
	161731	0.024562493	0.006797791	-0.015992064	0.025115123	0.012669382	-0.017512888	0.01739317	0.034922574	0.01273107	0.014261165	0.03339453	0.014267256	0.012250812	0.035160135	0.031141343	0.010036599	0.030114302	0.032985765	0.045937292	0.056810994	0.018872134	0.042807914	0.060937062	0.020018611	0.046233367	0.078236707	0.024174599	0.03822723	0.082204163	0.026629411	0.020016704	0.057090662	0.040818725	0.016697666	0.050389878	0.042801112
	162026	0.017479848	-0.033641294	-0.022862153	0.023337698	-0.024185998	-0.024351677	0.021357216	-0.006834788	-0.010701254	0.024017664	0.000222517	-0.011029678	0.009033734	0.002228675	0.011875903	0.011472681	0.002216001	0.011868114	0.02035955	-0.040731058	-0.034367148	0.026685813	-0.028138138	-0.036191672	0.034595702	-0.015758034	-0.026237112	0.03697392	0.002539934	-0.028017867	0.016510881	0.011291675	0.014742028	0.019697765	0.014887854	0.013834525
	162228	0.041899215	0.075830795	-0.012972998	0.033803836	0.083074838	-0.011078721	0.016532835	0.037781935	-0.000490508	0.014819627	0.033671342	0.000712964	0.00021932	0.009974644	0.025079381	0.003097098	-0.001227825	0.025599869	0.039415672	0.066573352	-0.015723966	0.030743698	0.075289264	-0.014289702	0.026798265	0.064301185	-0.009860982	0.018858023	0.066379517	-0.008508433	0.001810285	0.021533573	0.044312052	0.001612629	0.005299234	0.044772886
	162329	0.032108575	0.023196891	0.019402483	0.032808214	0.024098972	0.019632686	0.024880772	0.026667461	0.021822548	0.024838753	0.024842054	0.022409661	0.021612016	0.023955284	0.022447662	0.021513976	0.022005819	0.022958631	0.028623352	0.020339532	0.019151693	0.029605901	0.019671619	0.019418322	0.032586914	0.033030044	0.030521302	0.03272298	0.030270657	0.031143831	0.024175873	0.027391378	0.031590808	0.024601536	0.021272376	0.032359391
	162733	0.031757496	0.003676628	0.0119857	0.034697395	0.012145659	0.012267047	0.010478967	0.005537087	-0.007721347	0.005395657	0.012564744	-0.007830961	0.000400151	-0.004228223	-0.001069146	0.000596186	-0.003333287	-0.000964154	0.035900529	0.01404814	0.008145475	0.033201985	0.025595265	0.008305386	0.022979852	0.02334266	0.028949784	0.019510556	0.031402543	0.029796049	0.014227462	0.015474671	0.032496579	0.01436475	0.01773035	0.033152092
	163129	0.048953291	-0.035107341	-0.036727693	0.060169663	-0.027652875	-0.039430782	0.033538759	0.003391405	0.001121041	0.036835518	0.005898993	0.000352837	0.013589652	0.014432648	0.018556327	0.0131277	0.013360663	0.018502926	0.046732578	-0.014544811	-0.02220642	0.055185955	-0.006107964	-0.02401768	0.026751893	0.05266593	0.046566132	0.019462636	0.058865312	0.046973918	0.010156868	0.016435668	0.049579132	0.008237125	0.015715385	0.050422147
	164030	0.046320904	0.046295814	-0.010929556	0.040258583	0.052966882	-0.009458962	0.016015846	0.025665259	-0.003352329	0.012965186	0.025906429	-0.002266611	0.01725922	0.028243132	0.014788935	0.014310947	0.029233756	0.015571038	0.047644902	0.048064854	-0.001593103	0.040842392	0.056524601	-0.000302503	0.036336474	0.04992754	-0.009521826	0.028856078	0.055586807	-0.0079177	0.01319417	0.036043536	0.026646586	0.009368311	0.035143975	0.02803654
	164131	0.043528605	-0.015553266	-0.033155784	0.051073223	-0.008043933	-0.034142073	0.013537501	0.003072662	0.011839734	0.015399471	0.004709459	0.012045778	-0.001575692	0.010697959	0.03410681	-0.002543178	0.0092487	0.034762934	0.05555832	0.006563708	-0.009417557	0.05885632	0.016405072	-0.009254929	0.022252453	0.032990091	0.010161884	0.016597617	0.03650279	0.010547807	0.00670087	0.036070094	0.044174522	0.004011109	0.032965276	0.04533013
	165032	0.017437931	0.031249208	0.029393386	0.014458557	0.034620486	0.030089457	0.020802101	0.043967713	0.048400447	0.021305604	0.040153865	0.049687795	0.024255315	0.024348713	0.036861651	0.025568489	0.023644343	0.037014317	0.025304003	0.05887948	0.065665096	0.02548323	0.053925436	0.067703277	0.028655091	0.081335455	0.07497976	0.026125101	0.077040158	0.077933997	0.034711529	0.058586322	0.069582812	0.039425448	0.049244199	0.071304165
	165840	-0.003187057	0.024639107	-0.000196725	-0.004072639	0.021709271	0.001110238	0.025879843	0.027092107	0.020003496	0.027025085	0.028751539	0.020095976	0.009403982	0.004036904	-0.002865011	0.013741974	0.004542986	-0.003719755	0.026089754	0.025684727	0.015601291	0.027328447	0.031537507	0.015010553	0.020153312	0.027130051	0.037282333	0.015266931	0.030069273	0.038243555	0.01931469	0.012599158	0.022552893	0.019944541	0.017855568	0.021440087
	166438	0.030106677	0.015696175	-0.017165991	0.026907559	0.023078548	-0.015911039	0.024150724	0.048176859	0.022622557	0.020072997	0.048634022	0.023189388	0.010526709	0.02430287	0.0367181	0.01205358	0.018267369	0.036905602	0.040026255	0.033394672	0.006811412	0.035286848	0.04262634	0.007926283	0.044653606	0.071785316	0.03838665	0.036919773	0.079128332	0.038865164	0.025027877	0.053435262	0.047629654	0.023064556	0.049283821	0.048432335
	167036	0.04538149	0.025408439	-0.001163321	0.043359838	0.039246611	-0.000904372	0.013400667	0.047483843	0.033368923	0.009064546	0.046116777	0.033915211	0.005982455	0.026182387	0.043978605	0.001479553	0.027711116	0.044337891	0.068897739	0.02991203	0.009253742	0.066710621	0.048375264	0.009540209	0.032081742	0.056564655	0.024410905	0.021305561	0.066910923	0.024717353	0.018229751	0.045682933	0.065312386	0.010761339	0.050766937	0.065866329
	168341	0.047992319	0.034638062	0.018362459	0.049675748	0.041257244	0.018896721	0.016438207	0.029022345	0.006285846	0.015363388	0.029491993	0.006541776	0.018004449	0.031386618	0.019001504	0.018085392	0.030647302	0.018765057	0.047115903	0.036363974	0.038923319	0.048035331	0.039858464	0.038492154	0.021469938	0.024938781	0.025724636	0.02099981	0.023560476	0.024857042	0.019058459	0.030739341	0.032875232	0.020323398	0.026251528	0.032482091
	169343	0.029185524	0.021914849	-0.018793982	0.026452025	0.031126944	-0.018080449	0.026451243	0.036748551	0.004606464	0.021860296	0.041976657	0.005488981	0.014527366	0.030234441	0.032972578	0.012839161	0.029796721	0.033350565	0.031660255	0.014797749	-0.025968473	0.028450741	0.026235532	-0.025192343	0.038655419	0.059405178	0.011763696	0.028161749	0.070308901	0.01331129	0.026962968	0.063560367	0.048598237	0.019969888	0.064385332	0.049234699
	169444	0.042769775	0.004261988	-0.0476625	0.039552864	0.015539902	-0.047012966	0.045355313	0.054100666	0.009963897	0.038075686	0.061661419	0.010654553	0.024393752	0.05147209	0.034050465	0.020226635	0.048964433	0.035137538	0.038606483	-0.003509035	-0.053176913	0.036671914	0.006750362	-0.052796606	0.062454414	0.071028762	0.005471171	0.052230474	0.08332938	0.006621127	0.0246596	0.062314115	0.046682809	0.018476635	0.060634799	0.0478555
	170934	0.059567615	0.004066993	-0.018061459	0.063416652	0.016106663	-0.019044433	0.039091248	0.031463772	0.029940942	0.039417431	0.035126567	0.030049965	0.022402529	0.024344334	0.042141814	0.022336662	0.025024494	0.041879334	0.051583879	0.008473094	-0.01545082	0.052786272	0.019557124	-0.015760381	0.042683773	0.046814028	0.02134813	0.041224763	0.054341745	0.021410909	0.03247891	0.025474468	0.049435541	0.035386872	0.02760045	0.048643395
	171633	0.035021175	0.037379541	-0.004123786	0.031451918	0.048469581	-0.002306108	0.020852622	0.031000219	0.004998817	0.019042965	0.032359179	0.005109041	0.008417773	0.021712026	0.013705064	0.007668137	0.019637141	0.013667949	0.044534191	0.031593826	0.009730374	0.043361697	0.042379763	0.009442331	0.030817455	0.040760119	0.007666073	0.02715268	0.044060182	0.008889534	0.008840659	0.022803368	0.03008339	0.006305542	0.022642625	0.030946838
	172029	0.045818005	0.041449178	-0.005220221	0.041154403	0.047023442	-0.002636401	0.030672809	0.033832971	0.01502978	0.026118591	0.038403779	0.016219331	0.01416553	0.021859756	0.011019809	0.013379435	0.021940693	0.011629557	0.057784908	0.032129738	-0.003956262	0.052537363	0.045984417	-0.002710724	0.050863001	0.051614929	0.001771419	0.043624863	0.059071518	0.003770106	0.011491031	0.015449887	0.024815956	0.007933144	0.014449874	0.024336433
	172130	0.070784137	0.001735182	-0.043254219	0.077553369	0.021528138	-0.044266328	0.046475366	0.059827231	0.034208689	0.042458948	0.067524306	0.035114948	0.007866214	0.041162103	0.053181879	0.005915544	0.037485935	0.054062769	0.080935173	0.029882628	-0.01618889	0.085266314	0.048940271	-0.01694914	0.050262518	0.085887946	0.061769936	0.042496618	0.093072869	0.063458182	0.022139058	0.07151895	0.083272718	0.01898383	0.066352025	0.084935136
	172332	0.028881969	0.005864517	0.00294458	0.027709847	0.015966494	0.002767449	0.021434922	0.030269861	0.019306775	0.018230498	0.034488007	0.019724611	0.016247241	0.030913036	0.031528227	0.014276412	0.031024858	0.031377513	0.036301792	0.023717882	0.015103106	0.034148287	0.035007503	0.014856077	0.030086614	0.040547013	0.030610375	0.024815235	0.049964894	0.030505838	0.011006588	0.019371329	0.023684405	0.007751264	0.025449418	0.024269059
	172534	0.051842365	0.018935235	0.004535305	0.051707935	0.031549938	0.00359377	0.032072466	0.020225169	0.007818745	0.031797819	0.025377404	0.00767283	0.029027019	0.018232966	0.012281251	0.028810995	0.02377579	0.011833783	0.055372741	0.024739185	0.012799542	0.054727402	0.036747459	0.012153083	0.046974067	0.026304681	0.012789174	0.045868967	0.034772445	0.012572692	0.045440473	0.021622222	0.023563201	0.045840021	0.030810639	0.022671264
	173334	0.046112925	0.022663934	0.009628409	0.050709073	0.02830209	0.009175678	0.028588787	0.040134445	0.027776061	0.028335402	0.041664109	0.027582353	0.014830068	0.02635601	0.030535078	0.013523947	0.028668474	0.030382162	0.008814876	-0.015796665	0.016890829	0.007077509	-0.004543248	0.015202798	0.018001616	0.026207527	0.037699979	0.015355929	0.03238624	0.036583524	0.024880296	0.037519347	0.042413108	0.02547266	0.03900744	0.042217586
	173435	0.060373478	0.005000389	-0.021228716	0.065873556	0.017676858	-0.022294063	0.003923553	0.022120105	0.002916755	-0.00090588	0.022498842	0.00427953	-0.011032172	0.013534832	0.019156476	-0.014635508	0.009259109	0.020271439	0.037577111	-0.006304218	-0.010289946	0.041658349	0.00347385	-0.01153682	0.019772053	0.008228409	-0.015467125	0.016785927	0.01326518	-0.015581086	-0.020770747	0.006969951	0.026666777	-0.022339262	0.002861994	0.02746631
	173536	0.050631531	0.012956574	-0.007533968	0.052715622	0.023813723	-0.008586165	0.026062559	0.029381575	0.015468986	0.023108939	0.030076675	0.015710907	0.019742532	0.02559972	0.021647826	0.018225463	0.026067086	0.021313507	0.06031454	0.014995624	-0.007015925	0.062848642	0.025876693	-0.008029818	0.040785048	0.026979864	0.004687907	0.040044121	0.032887641	0.003692528	0.032302748	0.027130609	0.024910809	0.031414244	0.030969165	0.023917336
	173940	0.048823301	0.014517972	0.001596345	0.049607936	0.023268193	0.001220654	0.037325975	0.036991443	0.008076529	0.034053553	0.043536518	0.007509821	0.015653117	0.019259334	0.021567753	0.014338388	0.019100741	0.021563647	0.063203998	0.021958072	0.006170152	0.063537829	0.034861412	0.005028365	0.029705644	0.038445197	0.003972401	0.023911105	0.047718588	0.004269134	0.003823634	0.015962472	0.029537095	0.00101718	0.014160481	0.030156219
	175035	0.06012233	0.06599009	0.058009915	0.050347902	0.086627379	0.060113281	0.034853145	0.060399253	0.052263577	0.031518728	0.060594097	0.054084528	0.036946766	0.055348463	0.052227266	0.029004663	0.0644155	0.054346051	0.053072255	0.047909472	0.037911937	0.045642115	0.066934049	0.039181326	0.021151723	0.020229807	0.021596525	0.027852478	0.015150089	0.021197885	0.024160156	0.0300101	0.038789991	0.028910678	0.025966251	0.039431438
	175439	0.05155516	0.025143143	-0.004506211	0.045945756	0.042850878	-0.005184439	0.020471053	0.018460026	0.00222176	0.015176584	0.027617389	0.00281833	0.004910461	0.001127444	0.003390455	0.004972282	0.002035998	0.00303923	0.041202348	-0.000341834	-0.015713325	0.039256319	0.015453334	-0.015835946	0.039445501	0.019632095	0.012073948	0.036090601	0.033528753	0.011780075	0.012543695	0.007685163	-0.018401712	0.010746455	0.015040201	-0.018411141
	177645	0.066363685	0.044848174	-0.013131355	0.058095083	0.065171279	-0.013273894	0.038627252	0.065667823	0.012861875	0.029734721	0.073951401	0.013850227	0.002033925	0.02389029	0.050211769	0.001472985	0.019866068	0.05018473	0.063429974	0.050729342	-0.010710665	0.052777588	0.072318368	-0.010532902	0.035915773	0.061913278	0.001424126	0.025521837	0.072447032	0.002493436	0.024224518	0.048988152	0.03840987	0.019521743	0.051065508	0.038844459
	177746	0.042526692	0.007140805	-0.007551851	0.043232385	0.017780935	-0.007600438	0.038984898	0.03114632	0.011589778	0.038316049	0.034036551	0.011946877	0.017836276	0.023325505	0.022728521	0.016828051	0.021246525	0.023744818	0.048426583	0.002701276	-0.003971949	0.051686868	0.013898757	-0.004722685	0.068540692	0.045954119	0.006732711	0.066914037	0.056365721	0.006407189	0.022993384	0.033481356	0.020583127	0.020280873	0.033923503	0.02139763
	178849	0.04039612	0.009710427	-0.011445771	0.041260287	0.018908162	-0.012601624	0.004544072	0.01468365	-0.005001702	0.003067675	0.017482596	-0.004658835	-0.0059323	0.013953389	0.020445962	-0.008532645	0.009934812	0.020652475	0.035390191	0.006031269	-0.004595343	0.036217246	0.015343593	-0.005842584	-0.009772151	0.000172864	-0.004489698	-0.011586769	0.001511934	-0.004475854	0.006815188	0.027544115	0.036618624	0.003314165	0.02555283	0.037261371
	178950	0.031795986	-0.019685386	0.005627851	0.035754967	-0.013161923	0.006407203	0.027989732	0.026917879	0.012881543	0.028918538	0.025057329	0.013912327	0.011209597	0.033944629	0.032270368	0.008640504	0.031988598	0.032878168	0.047970138	-0.007524299	0.022473047	0.051458497	0.00027297	0.023743864	0.044911243	0.029867964	0.010515055	0.043434221	0.035409331	0.011963061	0.012541688	0.018382616	0.035604738	0.01189505	0.017034428	0.03695548
	179346	0.034550868	0.011333328	-0.007631289	0.030937063	0.020588217	-0.007584774	0.025348144	0.035932038	0.006132188	0.020848894	0.039381359	0.007185142	0.00791039	0.013404639	0.019876873	0.006469626	0.012799977	0.020669743	0.017516026	0.017249426	-0.004138032	0.012153498	0.023278896	-0.00267869	0.028237551	0.037554055	0.001002613	0.020660426	0.043946333	0.00301218	-0.017647509	0.012880526	0.02775049	-0.014595608	0.002644033	0.028537115
	180129	0.00819335	0.020858662	-0.007143145	0.00158311	0.022884771	-0.006485905	-0.000106161	0.024711573	0.000342903	-0.005169187	0.025225678	0.001384635	0.006363857	0.019728765	0.025663504	0.005452126	0.021649303	0.025897862	0.022350702	0.012800902	-0.010210299	0.019719109	0.02292205	-0.010369976	0.007775755	0.036419619	0.00371118	0.001104294	0.038174983	0.005227958	0.008210134	0.019516079	0.024441548	0.008041167	0.022730837	0.02471723
	180432	0.021980783	0.02547049	-0.009047363	0.01473642	0.037659049	-0.009280271	0.016454764	0.034008939	0.007052139	0.010838595	0.03599222	0.007563849	0.014709073	0.037120968	0.036707696	0.013042939	0.032701194	0.037268035	0.032116573	0.017604843	-0.016359743	0.025790319	0.03189468	-0.01651636	0.037686516	0.05601427	0.000234099	0.028394612	0.066216238	0.000478256	0.032430954	0.062464099	0.064517669	0.030307088	0.060527459	0.065513782
	180836	0.054475963	0.059365653	0.048002519	0.054563381	0.057107519	0.048669245	0.03338442	0.057703607	0.045136385	0.03054278	0.052917887	0.045694411	0.018231297	0.054100316	0.046770003	0.015257649	0.046924628	0.047022127	0.079333968	0.071134605	0.057608619	0.079998367	0.071010731	0.058529049	0.071117125	0.0923573	0.070107274	0.067340896	0.089311458	0.071193263	0.03766679	0.070074774	0.064274773	0.035131976	0.062932491	0.064732574
	180937	0.028124481	0.045845732	0.019708941	0.023234474	0.048104119	0.021418206	0.01109378	0.019168211	0.00489048	0.009950466	0.018739946	0.005775447	0.00503116	0.009022979	0.0049727	0.006215119	0.009614975	0.00503633	0.02871214	0.021262007	0.007234707	0.029063443	0.028891148	0.008596817	0.023268525	0.033700995	0.012636794	0.018447371	0.045271758	0.013893333	0.010309283	0.039554436	0.018537186	0.00558616	0.044171438	0.019850401
	181232	0.04988154	0.028343579	-0.00751055	0.046678346	0.038338464	-0.007703869	0.024840597	0.037358582	0.006067802	0.020573249	0.039058704	0.006290892	0.009088671	0.037205245	0.026089849	0.007096511	0.031381071	0.026791614	0.048272606	0.018059248	-0.005761282	0.046604574	0.027324844	-0.006557417	0.059065972	0.072850443	0.007369266	0.049021386	0.082889386	0.007258547	0.015073106	0.061912782	0.05332952	0.015173468	0.048968423	0.054404631
	182739	0.047330789	0.003542236	-0.005781697	0.045506939	0.012149871	-0.005935793	0.018842923	0.008910085	0.019332472	0.014609902	0.013651219	0.020279709	0.015517197	-0.001285308	0.015116022	0.014682829	0.001476499	0.015255882	0.045817494	0.001528683	-0.003084334	0.045152523	0.00983171	-0.003629507	0.026769366	0.002149469	-0.004346762	0.028198989	0.002322707	-0.004327393	0.027549984	0.014388753	0.013504148	0.028307211	0.014535703	0.012827829
	183034	0.02253888	-0.003028208	-0.002315382	0.022708431	-0.003856194	-0.001919175	0.025899401	0.02239617	0.01480434	0.021040784	0.025027508	0.015888255	0.0144349	0.018717904	0.019779136	0.011375887	0.017655192	0.02040269	0.016833454	-0.000945312	0.003082444	0.017053805	-0.002517293	0.003449314	0.027309127	0.020744244	0.019342406	0.023308882	0.023996027	0.020223448	0.016204668	0.0231936	0.027945809	0.013344713	0.023559848	0.028938917
	185139	0.023511175	-0.009657215	-0.016037477	0.030140681	-0.002789403	-0.017296279	0.026352897	0.03748475	0.018345168	0.024079893	0.03867605	0.01907425	0.016186848	0.025313538	0.025682079	0.017101133	0.022863735	0.02647596	0.036544617	0.014787226	-0.000545778	0.037494857	0.021762928	-0.000700151	0.034374762	0.062484194	0.039769039	0.025478318	0.06398432	0.041456163	0.017802894	0.042959563	0.040137481	0.015189695	0.041090205	0.041371785
	185442	0.056893013	0.0329757	-0.008899525	0.053058065	0.044928156	-0.008512322	0.031304158	0.040726975	0.011217058	0.024855096	0.047165353	0.012200841	0.014553293	0.040189814	0.026779521	0.007655852	0.043131392	0.027756227	0.074738197	0.032568719	0.00025763	0.073322251	0.04495319	0.000951365	0.045580175	0.060983133	0.034985166	0.03908924	0.064701192	0.036694419	0.008516341	0.060319345	0.04225092	-0.001018116	0.06064593	0.043923877
	187547	0.004922312	-0.013384254	-0.026296893	0.00774382	-0.011413775	-0.027013527	0.010046875	0.033727642	0.021255156	0.007057176	0.032922991	0.023024078	-0.002289119	0.025192093	0.045195945	-0.004042319	0.019304097	0.047100533	0.019092025	-0.021254512	-0.026242992	0.024867848	-0.016369803	-0.028282255	0.047499958	0.06634663	0.020070698	0.042230874	0.073817834	0.021227354	0.013956651	0.047902364	0.06465365	0.010701339	0.042238288	0.067143016
	187850	0.049314592	0.003143814	-0.004657004	0.050584257	0.012924909	-0.005200065	0.015106418	0.057256266	0.019119155	0.008883811	0.05360318	0.020144688	0.020753	0.032348309	0.030260375	0.019210281	0.030586774	0.030864216	-0.001738428	0.019541625	-0.01447162	-0.00573064	0.020168696	-0.014014357	0.014582234	0.048269819	-4.48E-05	0.007955341	0.050569091	0.000648049	-0.001579195	0.019766154	0.03256179	-0.003294924	0.012767711	0.033458292
	188347	0.031009475	0.024062866	0.017838974	0.030083759	0.027001917	0.018175978	0.021739691	0.027228106	0.021829421	0.01910047	0.028113445	0.022537403	0.018605579	0.024140608	0.021630699	0.015971486	0.025063483	0.022317188	0.041681528	0.03533747	0.025180271	0.039485954	0.039637506	0.025758995	0.041008659	0.04962172	0.041758824	0.036885068	0.05084978	0.043305043	0.024224866	0.038353678	0.038438741	0.019763153	0.037300538	0.040016707
	189349	0.06347914	0.027297225	0.010044404	0.059044164	0.04606412	0.009327907	0.031689398	0.039538022	0.023264615	0.024318879	0.051172134	0.023831166	0.016604846	0.037928049	0.036635246	0.011302103	0.04326582	0.037324797	0.063075148	0.02215502	0.004416772	0.058881231	0.040969107	0.003240942	0.044942673	0.042356074	0.020827906	0.036777217	0.057442222	0.021249836	0.005342788	0.054102104	0.058931116	-1.39E-05	0.052862052	0.060079936
	189450	0.065111004	0.028256191	0.00610779	0.064045899	0.040998954	0.005303113	0.022335207	0.03541965	0.02106056	0.013303279	0.041940272	0.021499006	-0.022638181	0.006512464	0.005505346	-0.026955344	0.003144281	0.006120922	0.089640759	0.021573789	0.020885186	0.091049708	0.038409445	0.020018062	0.056799095	0.023235161	0.032784212	0.050902195	0.037746288	0.032959029	0.004549967	0.02413181	0.039626237	-0.002465212	0.026231758	0.039656457
	190031	0.036486227	-0.009328288	-0.009801403	0.037877273	0.003488769	-0.010571503	0.018310677	-8.33E-05	0.00175217	0.018132411	0.005632841	0.001721116	0.014861946	-0.000825005	0.003478043	0.015052137	0.004183103	0.003481254	0.051449671	-0.015263057	-0.011609244	0.052323386	0.003952979	-0.012819625	0.038396988	0.026577448	0.022613496	0.036143731	0.035604738	0.023213228	0.023638656	0.012817936	0.016632114	0.025120748	0.016853614	0.017374134
	191336	0.087299459	0.071250588	0.050898094	0.085794866	0.084351495	0.052674543	0.039022993	0.047833201	0.045781139	0.038469683	0.047951788	0.047418579	0.030967476	0.034268167	0.040039621	0.03329232	0.032673325	0.040875275	0.076228477	0.054573767	0.042165034	0.077894963	0.062524356	0.043195482	0.057631709	0.06182218	0.048462197	0.058133475	0.062002838	0.050088104	0.034502532	0.035457004	0.0451863	0.036693163	0.033270352	0.046140589
	191437	0.004140306	-0.034030136	-0.010930296	0.008384586	-0.03022125	-0.012141739	0.027290253	0.032209143	0.016387662	0.023771068	0.035505429	0.016950829	0.014022961	0.026226567	0.021787614	0.012468314	0.023347808	0.022087852	0.019324159	0.025255712	-0.000798595	0.021554917	0.022097405	-0.001737049	0.03353738	0.062793456	0.014376128	0.029267522	0.062796496	0.014724602	0.008367191	0.029163094	0.017143231	0.008025894	0.025058135	0.017328274
	192540	0.041961811	0.011375929	-0.001271482	0.038745038	0.023986714	-0.001519811	0.038787544	0.0473359	0.018934013	0.035226904	0.052182786	0.019230403	0.014949046	0.036348183	0.026838571	0.010953081	0.037169334	0.027236456	0.058981657	0.047074754	0.009964115	0.057918444	0.05766182	0.010056851	0.05984778	0.084345005	0.033876438	0.0535064	0.091098055	0.034840394	0.009668037	0.058828376	0.04719045	0.00260059	0.057987817	0.048353754
	192843	-0.025275365	-0.025091372	0.010342087	-0.020717951	-0.027113067	0.009144315	0.055008136	0.060495656	0.02229646	0.042224694	0.074782334	0.023459293	0.046467446	0.059341453	0.027168598	0.036209464	0.068093367	0.0288298	-0.007086024	-0.0115219	-0.008577803	0.001971831	-0.01327025	-0.00952548	0.031560544	0.032871466	0.014664195	0.032417703	0.042414773	0.01459995	0.001280461	0.007707047	0.047891051	0.005467398	0.008528302	0.047541659
	193239	0.047988389	0.035055809	0.0293973	0.045114283	0.048104983	0.028044717	0.014360108	0.018064713	-0.000983505	0.017352667	0.014670445	-0.00127226	0.007207494	0.00707318	0.002202276	0.009703161	0.004520401	0.00176467	0.014925089	0.02271024	0.005270027	0.018720435	0.019575914	0.005522822	0.000739392	0.024826551	0.010121749	-0.002282483	0.025456402	0.011197397	-0.008590534	0.008887172	-0.007131044	-0.006599756	0.002646924	-0.006057028
	194140	0.034498435	-0.004503401	-0.009636906	0.040409036	-0.000106046	-0.010048482	0.019523263	0.023297189	0.014032576	0.022869255	0.021058012	0.014564495	0.005398999	0.022314407	0.019117674	0.003147619	0.021669999	0.019144222	0.024330102	0.01366322	0.012926619	0.0286489	0.01249871	0.012765764	0.021089403	0.04632676	0.028012559	0.01764605	0.044838406	0.028094832	0.009383964	0.032111712	0.028169248	0.006202023	0.030675407	0.028454395
	194645	0.052418508	-0.015619091	-0.010022244	0.0606323	-0.006134265	-0.010663883	0.021440487	0.016086921	0.006937768	0.021209819	0.018739508	0.007351453	0.015550056	0.010352527	0.009662483	0.015377454	0.014357274	0.010352571	0.051629547	-0.01756604	-0.011611714	0.05832345	-0.00627653	-0.012346569	0.057162251	0.021896282	0.00910388	0.054499477	0.038115848	0.008699682	0.027130838	0.019012785	0.01338567	0.025588455	0.028839815	0.014396752
	194847	0.05041204	0.010651691	-0.009915593	0.054091718	0.022536445	-0.008734162	0.047909737	0.047315393	0.015879543	0.04567318	0.056693595	0.017391676	0.009853911	0.023997389	0.034134794	0.008755229	0.022348506	0.034814045	0.034668632	0.010663629	0.001872503	0.03438035	0.020325175	0.002106322	0.044653058	0.042611618	0.019128421	0.042144842	0.05183138	0.020161755	0.00790597	0.026805621	0.035465516	0.003148936	0.030793071	0.036411807
	195041	0.042580508	0.025586359	-0.012760305	0.042577472	0.029355319	-0.012412786	0.010324646	0.009476181	0.006623845	0.008863538	0.010204166	0.006783125	0.004300029	0.010740165	0.02486732	0.003360369	0.010417842	0.025542071	0.03587573	0.01962265	-0.00111282	0.036010619	0.023599138	-0.000225892	0.036000066	0.03605102	0.026385706	0.030218124	0.04444167	0.027279414	0.01275014	0.026423918	0.034693826	0.008697118	0.027983993	0.035693821
	195849	0.086807579	0.042488679	-0.005109754	0.079653963	0.071216136	-0.004309064	0.028491696	0.043691251	0.007921348	0.022087749	0.04953859	0.009612445	-0.005032471	0.027252031	0.049569447	-0.00695475	0.018262412	0.050822999	0.059412401	0.034506723	0.000919494	0.051356275	0.056154288	0.001426702	0.026159126	0.037033841	-0.016916644	0.019996032	0.048926525	-0.016221415	-0.007405714	0.034382727	0.055527672	-0.011724376	0.028944157	0.056191385
	196144	0.024470283	0.024083894	-0.000330043	0.026342772	0.0199483	-0.000623581	0.033031806	0.065497302	0.031590972	0.029017596	0.063967705	0.03282224	0.011337554	0.026357206	0.013328508	0.009734413	0.022372156	0.013713814	0.038310159	0.050373215	0.037753761	0.036203273	0.050704286	0.039347284	0.020829754	0.045898277	0.020642504	0.017278662	0.046954304	0.021441234	-0.003212556	0.00985761	0.005913043	-0.00431763	0.006458242	0.00620151
	197348	0.022794904	0.002823437	0.001863136	0.018742271	0.011212263	0.00153093	0.010960983	0.013557209	0.016353708	0.010221531	0.012503202	0.016438669	0.001962159	0.012416757	0.021040728	0.001236148	0.009634882	0.02076029	0.0010828	-0.007802751	-0.009585156	-0.002978428	0.001118744	-0.010044422	0.015936799	0.012497199	0.00423782	0.008795761	0.02504159	0.004217732	0.00096394	0.009003622	0.020053232	-0.000204669	0.011233541	0.020358169
	198855	0.039187014	0.010950433	-0.017897939	0.038346592	0.020810902	-0.018237606	0.007578499	0.028660852	0.017968722	0.004410986	0.027544485	0.017852442	0.001319322	0.010424541	0.02119161	0.001219651	0.007590566	0.02082262	0.029076861	-0.009150214	-0.027223241	0.029647846	0.000784888	-0.027032284	0.002863937	0.01638459	0.015859332	9.22E-05	0.01749054	0.015903415	-0.001808524	0.006571381	0.026788196	-0.000794427	0.003615832	0.026899375
	199453	0.060796641	0.037936028	0.019035326	0.06130147	0.04138479	0.018635478	0.045922562	0.052819572	0.029643398	0.041565098	0.054219954	0.030335467	0.015434214	0.034648038	0.025874648	0.012215207	0.031389408	0.02607945	0.062238429	0.040880557	0.023633437	0.062099088	0.047195639	0.023344796	0.087764718	0.084545411	0.051169686	0.079321444	0.096005835	0.052064735	0.021943903	0.052718662	0.055023856	0.014763917	0.050491072	0.055296306
	199655	0.05577676	0.004090318	-0.00903568	0.062316991	0.013797932	-0.010991749	0.030819356	0.002508942	-0.007157091	0.035254724	0.005162293	-0.008214801	0.018857339	-0.001164756	-0.002055301	0.023841821	9.15E-05	-0.00307921	0.050369743	0.009184044	0.002373306	0.054720853	0.018369962	0.001245911	0.040363334	0.015755627	0.007041183	0.042990603	0.020165514	0.006160855	0.01177298	0.021603616	0.027264964	0.012691784	0.020862861	0.026905539
	199958	0.040904429	-0.004636809	0.00801982	0.044883516	-0.002680558	0.007820127	0.027540984	0.0349029	0.036109403	0.021105828	0.037490532	0.037284967	0.022628382	0.017135207	0.037238248	0.016176753	0.022800464	0.037420541	0.06001839	0.003677363	0.016406657	0.063378856	0.010596656	0.015491329	0.035899859	0.052182656	0.054751616	0.033063993	0.051342119	0.055454891	0.024890026	0.030865252	0.043570507	0.022836115	0.031672411	0.04424499
	200109	0.043212619	0.049338847	0.024765791	0.044146925	0.051430196	0.026297653	0.022228258	0.047352817	0.022888593	0.01719036	0.045388374	0.025074171	0.009920176	0.035900179	0.044488858	0.007964698	0.031147702	0.045921382	0.05018571	0.033325274	-0.00230984	0.051165797	0.041761819	-0.000736194	0.031091252	0.042651348	0.000907725	0.026839502	0.048788473	0.003094719	0.033512965	0.058908816	0.054868549	0.031906161	0.055178281	0.056515299
	200614	0.000306608	-0.017795719	-0.021819681	0.009723327	-0.023890348	-0.022270186	-0.007865975	-0.019825092	-0.011896664	0.000476885	-0.027522273	-0.012279958	-0.005149368	-0.018320048	-0.005995439	0.002520939	-0.02513838	-0.006254848	0.031026825	-0.005702714	0.003822842	0.03423512	0.000141166	0.002952959	0.006653897	-0.004474627	0.000387878	0.010618777	-0.005100349	-0.000195537	0.003275147	-0.01106511	0.002283513	0.010213777	-0.015966371	0.001886742
	201818	0.026783414	0.018984132	-0.011737577	0.023695692	0.024009818	-0.0117454	0.015184985	0.027593663	0.009197194	0.011604136	0.024191273	0.010102902	0.014941974	0.032099906	0.026598372	0.012962407	0.02674176	0.027674712	0.040295642	0.025405219	-0.002692952	0.035909932	0.034065813	-0.002393254	0.031518906	0.054090552	0.011212112	0.026177319	0.051026214	0.012737151	0.02181918	0.036406476	0.019550012	0.017553061	0.036021255	0.020422012
	203418	0.036585659	0.016235251	0.011638392	0.038355686	0.018638257	0.012269393	0.016582791	0.025739824	0.019612521	0.015012603	0.022034254	0.021084255	0.000930114	0.022678256	0.032943569	-0.000659113	0.014782794	0.034378115	0.04539571	0.020648904	0.009201345	0.047069374	0.030269999	0.009631045	0.03478365	0.039339669	0.012716752	0.032578554	0.042992339	0.014138536	-0.004257222	0.040413436	0.043642867	-0.007941318	0.031541042	0.045774177
	204016	0.016700979	0.005127837	-0.002720644	0.019795502	0.007537469	-0.00230392	0.015295587	0.022573277	0.030792659	0.01438339	0.024808256	0.031758517	-0.005612869	-0.002957462	0.022777328	-0.002964787	-0.006335	0.022384183	0.041680072	0.015574741	0.009260608	0.037047375	0.028695451	0.010032932	0.025935501	0.025733216	0.023426265	0.018096972	0.031467557	0.024879266	-0.0009924	0.010048942	0.03393897	-0.001815048	0.006496132	0.034254029
	204521	0.037517615	0.037000217	0.016328121	0.034991164	0.047060013	0.0173635	0.028468251	0.04803215	0.042288646	0.029353665	0.04452664	0.04383282	0.015602189	0.036387634	0.030488677	0.01533876	0.034572121	0.031610616	0.030300209	0.029512824	0.015820147	0.028722264	0.037467506	0.016655	0.02676942	0.049735863	0.04652828	0.02450362	0.052298266	0.047927797	0.01248409	0.034642249	0.039205261	0.011451099	0.033265598	0.040483981
	205119	0.010711303	0.015191742	-0.011218021	0.008504583	0.017209036	-0.010560727	0.024788242	0.021925738	0.014409863	0.023998028	0.028294755	0.014670054	0.014279786	0.004865264	-0.003270445	0.016156247	0.009869875	-0.003272267	0.013359902	0.018332003	-0.011507965	0.012207326	0.020779191	-0.010942224	0.006936889	0.034664314	-0.002247539	0.001210043	0.037421912	-0.000845156	0.008602812	0.011130059	-0.00024342	0.007899216	0.016238755	0.000368196
	205725	0.029657926	0.019227795	0.008249824	0.031048318	0.023310548	0.007832432	0.036499985	0.04859772	0.019273689	0.033829536	0.050489236	0.01992446	0.033702787	0.051073574	0.037330605	0.031303748	0.05042563	0.038708653	0.021308677	0.005512565	-0.009964478	0.020650826	0.013068791	-0.011113117	0.043662399	0.056257408	0.018630583	0.037700448	0.063186817	0.018603677	0.014575364	0.021477461	0.018138997	0.012615286	0.023815136	0.017990459
	208226	0.070023932	0.017369146	0.039163336	0.074023798	0.035933107	0.038944799	0.063792244	0.008906846	0.015225515	0.064787626	0.026372863	0.015247228	0.043227773	0.016307341	0.030328648	0.04421607	0.027500065	0.030210722	0.050918229	-0.021926781	-0.012621818	0.055758141	-0.007293262	-0.012916415	0.101249829	0.064864039	0.073291257	0.096937835	0.093121417	0.072931387	-0.037870836	0.022464033	0.010856107	-0.046076346	0.015886841	0.010947101
	208327	0.03281258	0.041967448	0.002298332	0.029973079	0.047865897	0.00242638	0.01281334	0.040090755	0.023843369	0.009725435	0.037942111	0.025037101	0.003682103	0.021196265	0.033640843	0.003580238	0.01696411	0.03474671	0.030860992	0.03063049	-0.002973924	0.031247612	0.035323132	-0.002307305	0.019750284	0.06655845	-0.000260553	0.013072638	0.070713937	0.00016469	0.00735831	0.034447946	0.038693696	0.006750572	0.031659659	0.039766043
	210011	0.058333267	0.033072662	-0.020992279	0.056644574	0.050486587	-0.021848856	0.026991222	0.039468318	-0.003707063	0.023260865	0.039794054	-0.003495279	-0.011986438	0.019040309	0.023249337	-0.011904028	0.008302055	0.024212364	0.063522696	0.031280238	-0.008884015	0.063217953	0.04489819	-0.010091471	0.027623225	0.038290318	-0.000982305	0.024088351	0.039006818	-0.000794791	-0.011534059	0.020741945	0.044880334	-0.008750311	0.003916197	0.045511972
	210415	0.016011344	0.010254649	-0.009120395	0.022106498	0.005378749	-0.010457284	0.00394839	0.01863884	0.007773267	0.008812868	0.010662447	0.007269842	-0.003940557	0.010420747	0.011037124	0.001804571	0.001350484	0.009996443	0.026401125	0.024251301	0.017550971	0.027815284	0.024592683	0.017774347	0.032073263	0.045610558	0.03862289	0.031300075	0.044476841	0.039849315	0.032468624	0.043236479	0.046226211	0.025384435	0.047266934	0.048589732
	210617	0.029122975	0.011183665	-0.030132251	0.023354074	0.024611928	-0.030046474	0.023301119	0.038723994	0.031834356	0.02016319	0.038378142	0.032892711	0.00519856	0.02429625	0.03305845	0.004127503	0.020586008	0.033584673	0.062468398	0.046017643	-0.026155284	0.053148128	0.067876227	-0.025669407	0.055530161	0.064449869	-0.015518093	0.044649944	0.085225493	-0.01544748	0.030827655	0.049675412	0.025331441	0.026659895	0.054103967	0.025967242
	211215	0.02231898	-0.010680514	-0.00491288	0.026294215	-0.005058395	-0.005140957	0.000790645	-0.015309393	-0.000654458	0.00318999	-0.013395681	-0.000278796	-0.002283161	-0.012215024	0.003614018	-0.000120805	-0.012132645	0.003827876	0.039577018	0.010979253	0.00466382	0.04134899	0.019333417	0.00459231	0.023933304	0.004909583	0.003145631	0.024781732	0.011132694	0.003284568	0.003282822	-0.021246841	-0.000428299	0.005885229	-0.016810631	0.000210044
	211316	0.022810727	0.001667166	0.021081703	0.019666336	0.004165315	0.021614814	0.010431397	0.022097819	0.02680267	0.007055327	0.020366399	0.027903251	0.022292785	0.023937678	0.03098115	0.022998719	0.022141714	0.031421512	0.052911129	-0.002296072	0.013423172	0.060007822	0.00228066	0.011962975	-0.003565511	-0.005446869	0.026332509	-0.005436442	-0.007752227	0.027289132	0.006723185	0.008531319	0.030405464	0.007057616	0.00330635	0.030688178
	211417	0.024997305	0.018387828	0.000562233	0.024477037	0.024091622	0.000779544	0.016698016	0.022990728	0.01139775	0.014427282	0.025463434	0.011656934	0.009026952	0.019894125	0.025101548	0.008017191	0.018033467	0.025739761	0.014302714	0.031532548	-0.006014478	0.012134255	0.033982474	-0.005412689	0.025489239	0.042953979	0.008047557	0.02233753	0.044155069	0.008302082	-0.00757945	0.018740874	0.029459603	-0.00610785	0.010950855	0.030457554
	211922	0.077611946	0.038525395	0.020643556	0.078227863	0.051960278	0.019217219	0.04928606	0.047369011	0.030510105	0.047364499	0.053509496	0.030231358	0.019855632	0.045533121	0.039335657	0.020871026	0.039133683	0.039954565	0.062706396	0.033327758	0.029543787	0.065274917	0.041270837	0.028798634	0.065774806	0.062385783	0.048850019	0.06310603	0.068595737	0.048836697	0.003006519	0.042438794	0.049882803	0.005212867	0.027635507	0.051194474
	212116	0.047640115	0.033104014	0.02211111	0.044681769	0.034555092	0.021703266	0.017147595	0.043729883	0.045645781	0.004437126	0.046801835	0.046530765	0.005585608	0.028650766	0.038890783	0.000240304	0.027371844	0.039559942	0.033259928	0.023829509	0.006432088	0.029877692	0.030402182	0.004874788	0.021594223	0.058258712	0.054283015	0.003860091	0.063157633	0.055226576	0.009944339	0.034285564	0.049973618	-0.001221806	0.036217567	0.051109441
	212217	0.032048881	0.005088698	-0.009961163	0.025117639	0.019673089	-0.009900139	0.017566241	0.018099353	0.025427945	0.01538681	0.01611401	0.026738938	0.005129334	0.009601555	0.03243551	0.004059786	0.006581082	0.033294104	0.042500909	0.008698829	-0.000922718	0.035961814	0.027698148	-0.001379502	0.032508999	0.024622781	0.012170582	0.028235672	0.033001266	0.012751024	0.01047338	0.012246643	0.031694125	0.009632603	0.013770083	0.032290965
	212318	0.022171857	0.002746178	-0.031384867	0.016612181	0.014219356	-0.031821128	0.009969722	0.02333777	-0.000646312	0.002116903	0.030080093	-0.000221811	-0.005181193	0.001571998	0.011964943	-0.005043061	-0.000575934	0.011549167	0.025135972	0.010708885	0.003416761	0.027311541	0.012463139	0.001975114	0.004273166	0.037131082	0.008610627	-0.002047528	0.040474478	0.007986761	-0.010441311	0.011750359	0.011955314	-0.011699196	0.009000445	0.011835509
	212419	0.070989795	0.061170068	0.021890642	0.066712961	0.074048296	0.021045504	0.044582546	0.061583623	0.016710231	0.040327854	0.067828536	0.016661655	0.010844483	0.041367859	0.037406709	0.009600692	0.035715397	0.037866943	0.086126171	0.087653808	0.029823313	0.079786427	0.103723101	0.029250685	0.058073375	0.07270842	0.014881187	0.052270945	0.084465198	0.014502917	0.036010172	0.067605168	0.045253336	0.033344291	0.067147844	0.046171263
	214019	0.037339646	0.011037532	-0.000998194	0.038694456	0.013135609	-0.002066553	0.023139168	0.035654757	0.019178692	0.018558988	0.037858028	0.019610139	-0.000422942	0.019287916	0.015076029	-0.001774965	0.014460648	0.015089625	0.038982753	0.005083594	0.006814438	0.038652193	0.011176354	0.00585926	0.036461912	0.039736181	0.012257883	0.031183125	0.044800766	0.012515938	0.0102699	-0.002722231	0.021294558	0.008245633	0.000939682	0.021754043
	214423	0.025417466	0.028870258	0.017288694	0.021636287	0.033286825	0.018406462	0.028407728	0.043200098	0.036639698	0.024094697	0.044722948	0.037540678	0.031865634	0.040761709	0.044118084	0.028324269	0.042425577	0.044563897	0.016807877	0.009657238	0.002136788	0.017203378	0.012203051	0.002540695	0.012066908	0.024217058	0.020377582	0.011015047	0.023305306	0.020960722	0.024486508	0.032079484	0.040264178	0.024368078	0.030682387	0.040365692
	217429	0.006040977	-0.003455427	-0.009925182	0.008568683	-0.003543719	-0.009470681	0.004712865	0.014893877	0.006338467	0.002078438	0.014808159	0.006997768	0.004468171	0.017138844	0.015670992	0.002167808	0.016091881	0.016403047	0.011074808	0.00150706	-0.005043465	0.01204813	0.003019723	-0.004670759	0.013101869	0.020828495	0.01613418	0.012100536	0.020104041	0.016628973	0.011877907	0.027219664	0.025579179	0.009925933	0.025459668	0.026413793
	221319	0.033229817	0.027424743	-0.003567246	0.030533487	0.034825411	-0.003977171	0.004419809	0.022694232	-0.002954485	0.004361896	0.022829795	-0.002984915	0.008522252	0.022711886	0.007852047	0.007890574	0.025531253	0.007852288	0.033167049	0.033775393	0.011399863	0.029195115	0.043136071	0.011866668	0.019999193	0.039304849	0.003514892	0.015440398	0.044833466	0.003661665	0.006009118	0.027923355	0.017680654	0.00155649	0.03171647	0.018719837
	224022	0.07206966	0.058964632	0.035841633	0.070453547	0.064896472	0.037700303	0.021095812	0.027593253	0.020999819	0.021646611	0.024273584	0.022130474	0.011058081	0.014750788	0.023284007	0.012429656	0.011181242	0.024142578	0.076313987	0.063911907	0.047654614	0.072956659	0.071916014	0.049580824	0.040729035	0.055738136	0.03819466	0.038510729	0.053370111	0.040265944	0.040848132	0.054967485	0.054899741	0.036943626	0.054335918	0.05709051
	231928	0.046339549	0.003056079	-0.027635982	0.048895005	0.011847247	-0.027387073	0.022899326	0.02470891	0.013487835	0.023190156	0.025867749	0.01459567	0.008288512	0.025072107	0.02379949	0.009250513	0.020373924	0.024280176	0.049512051	0.002235806	-0.026160298	0.05092641	0.012722501	-0.026111452	0.047812384	0.035813838	0.012474254	0.045908816	0.042665277	0.013596264	0.020874944	0.039214086	0.034248669	0.022932019	0.033587519	0.034894455
	239944	0.027159156	0.048057519	0.014153432	0.023010939	0.051482879	0.016298108	0.017583061	0.043850146	0.017025927	0.011581204	0.046908658	0.018224118	0.002999802	0.020810023	0.022065349	0.002331157	0.018015111	0.022668544	0.039846599	0.042060178	0.01564927	0.035754126	0.049377576	0.016962783	0.032542389	0.06116173	0.021165261	0.026217412	0.066700399	0.023114881	0.024964718	0.051274985	0.036053486	0.022768972	0.050922774	0.038610198
	245333	0.028310999	0.00732643	0.004976171	0.023964988	0.017350156	0.005852461	0.007348908	0.009821163	-0.001985698	0.004110459	0.011336114	-0.001097208	-3.57E-06	0.018493563	0.024603253	-0.000763131	0.013486437	0.025080455	0.0239108	0.02189154	-0.028261712	0.022743292	0.028299211	-0.028166087	0.020515839	0.045154233	0.000335156	0.014934719	0.045029707	0.00166209	0.000376632	0.021968989	0.01465803	0.000710522	0.016338151	0.014784968
	250427	0.055568825	0.006649362	-0.004482429	0.051686373	0.021499418	-0.00505783	0.021591915	0.040952392	0.016347617	0.014160153	0.044491123	0.017283289	0.0040963	0.025687555	0.018663552	0.004743643	0.02115564	0.018581113	0.03602938	0.008117609	-0.001137599	0.035207521	0.015530671	-0.001499407	0.028978834	0.044331431	0.014019931	0.019825893	0.051309861	0.014588737	0.011463595	0.0186611	0.018696046	0.013877117	0.016752709	0.018178133
	250932	0.074892275	0.044406164	-0.00799105	0.065615751	0.059445933	-0.009129194	0.028180247	0.038306009	0.008211358	0.02144159	0.04195584	0.008600581	0.010946885	0.03552847	0.022461627	0.009503211	0.030970011	0.022851925	0.074521467	0.031308401	-0.001217756	0.066561721	0.051158965	-0.002744331	0.021848401	0.071475156	0.030272081	0.012238754	0.073185891	0.032027777	-0.011002257	0.047931179	0.04034413	-0.01524521	0.040389601	0.042141747
	251833	0.043852881	0.033277079	0.00637731	0.041533638	0.042421952	0.006588466	0.027518844	0.023008836	0.012823888	0.027214155	0.024280662	0.012412705	0.018425308	0.01809953	0.020320317	0.019823482	0.01647798	0.019941205	0.036895674	0.020412141	-0.000901808	0.03660937	0.030232653	-0.001837081	0.029260706	0.032745916	0.017775552	0.027099798	0.036641974	0.017908119	0.013693236	0.016281346	0.025303237	0.014802568	0.015748246	0.025469964
	255639	0.052779522	0.033135626	-0.008675296	0.049796849	0.040463436	-0.007369362	0.010713063	0.023739023	0.001255281	0.009955934	0.023873452	0.001747198	0.014966054	0.028513826	0.02199392	0.014388097	0.026854938	0.022906763	0.053223718	0.048191346	0.019129436	0.050742403	0.053625703	0.020132612	0.040976875	0.0618327	0.023147885	0.036006905	0.067133971	0.023727065	0.01950386	0.042713381	0.024497218	0.017133415	0.043664403	0.025095997
	256540	0.040567201	-0.002766216	-0.027198054	0.044929288	0.004116231	-0.027634097	-0.004791099	-0.005743351	-0.015191971	-0.002733713	-0.00602528	-0.015215664	-0.012437087	0.005858534	0.008613053	-0.012883168	0.003097923	0.009266067	0.050339311	0.01470804	-0.014785892	0.052007496	0.02242066	-0.014615179	0.044437654	0.044522066	0.004387062	0.040202267	0.051714443	0.004338957	-0.005945983	0.021616302	0.028809104	-0.011249885	0.021655954	0.02898678
	268850	0.072751641	0.050384484	0.020840149	0.073355362	0.055131692	0.021303385	0.030732486	0.039089341	0.019135589	0.03106619	0.035884801	0.019559518	0.005718195	0.02125272	0.021070626	0.006058785	0.016572209	0.021286653	0.079394057	0.056418251	0.02162566	0.080591679	0.062316906	0.021865724	0.065827772	0.076712623	0.039760508	0.063587114	0.07806769	0.040307734	0.046311799	0.051250454	0.043862399	0.046521291	0.051041611	0.044153053
	280739	0.039746892	0.023306329	-0.008539095	0.038591117	0.03346746	-0.00882504	0.012054665	0.038180064	0.035688072	0.01181314	0.033885658	0.036803063	0.003383859	0.011812885	0.023932252	0.004402474	0.009463628	0.023945913	0.041687354	0.019708892	-0.013088096	0.037940111	0.030860284	-0.013449174	0.042981032	0.051473293	0.028676443	0.039731007	0.053180281	0.028558932	0.014074331	0.025753288	0.036733039	0.012859053	0.022788128	0.037091233
	285345	0.04873294	0.019448204	-0.021036711	0.042974856	0.031350702	-0.020450043	0.018353473	0.048615862	0.028389215	0.0134102	0.050129373	0.029547825	-0.001196655	0.024615284	0.03366923	-0.001054394	0.019502558	0.034551419	0.052717458	0.036202382	0.008040939	0.045432854	0.049281988	0.009063887	0.0412088	0.089058012	0.054666214	0.030715201	0.096568748	0.05591974	0.00442305	0.047751352	0.051671114	0.004714857	0.041218411	0.052435331
	285446	0.026586419	0.013224803	0.020315949	0.028951038	0.016678633	0.020304849	0.015406461	0.040465165	0.024425127	0.008577934	0.042289481	0.026024526	0.006868747	0.037279669	0.032322861	0.000651644	0.036894035	0.033581078	0.040830418	0.046377826	0.015206677	0.032439273	0.058099352	0.016030308	0.014571547	0.043671094	0.021730511	0.006943893	0.046831142	0.023291793	0.005945006	0.035399742	0.037464049	0.001645968	0.033990826	0.038677372
	289555	0.044315442	-0.020884583	-0.022379078	0.051722199	-0.013063402	-0.023703454	0.014247929	0.016333247	0.004735202	0.012408521	0.015440456	0.004993179	-0.00959707	0.008152979	0.015801925	-0.010718442	0.003810409	0.016256252	0.042242583	-0.000915407	-0.019466683	0.043805901	0.006993336	-0.020100914	0.024847824	0.031027604	-0.008115557	0.016742717	0.03938587	-0.007968646	0.006258535	0.015422112	0.004717882	0.002610035	0.016293887	0.005206709
	290136	0.054324716	0.016008595	-0.016456841	0.048890091	0.036230091	-0.016715564	0.032122385	0.027250607	0.011658878	0.028295487	0.033120088	0.011884211	0.007753768	0.031485561	0.037065774	0.00609418	0.025040684	0.037770472	0.06060053	0.021703569	0.00595584	0.057860281	0.033881929	0.005505438	0.050651528	0.034602158	0.006394689	0.04729851	0.045538329	0.006175986	0.016609531	0.041814018	0.051894989	0.016747551	0.033029262	0.052093439
	298051	-0.00795507	0.005157832	-0.040465225	-0.010930504	0.006342348	-0.039370671	2.88E-05	0.003598296	-0.025940999	-0.000777496	-0.003093226	-0.025971923	0.006149907	-0.006219237	0.096621811	0.014735392	-0.026476042	0.093993448	0.03203807	0.022205314	0.061219063	0.034751002	0.014161483	0.05941949	0.028071951	0.055927347	-0.020090261	0.022366866	0.063244767	-0.01823182	0.016521957	0.041530576	-0.049377229	0.009727853	0.057919826	-0.046518669
	303119	0.019747173	-0.014922482	-0.002669158	0.021276889	-0.016221453	-0.004812127	0.032059629	0.020157434	0.006619013	0.029751049	0.022842517	0.006562808	0.014626903	0.029852835	0.030242838	0.01266575	0.031378731	0.031239593	0.003564279	-0.009425955	-0.002668462	0.003525446	-0.010857459	-0.004128018	0.011154694	-0.008891422	-0.001260479	0.010009378	-0.01024651	-0.00341813	0.007870276	-0.006745787	0.009760492	0.007834504	-0.010341872	0.007794019
	304020	0.043541782	0.033264745	0.009599578	0.043864921	0.033720899	0.011024893	0.040720578	0.04245656	0.020464087	0.040389918	0.041749299	0.021826381	0.020836571	0.030732544	0.017743254	0.021533959	0.026183777	0.018723609	0.033435401	0.060696281	0.032116741	0.029176801	0.058429427	0.034228563	0.034867413	0.055455048	0.026326634	0.031599887	0.052229069	0.028170958	0.031692415	0.057830341	0.033976462	0.029670911	0.051278103	0.035976987
	307127	0.027284853	-0.001471538	-0.018884497	0.031702764	0.000447365	-0.019879431	0.01917921	0.023284024	0.003426225	0.017554207	0.026319198	0.003443023	0.005101327	0.023160106	0.01917458	0.005960659	0.01828381	0.019631382	0.036886901	0.013720865	-0.004184357	0.036528938	0.022560507	-0.004990353	0.029101577	0.034577295	0.005753953	0.023643948	0.041068196	0.005855023	-0.005387883	0.042982984	0.040052954	-0.005442794	0.03191445	0.041305173
	334635	0.052253135	0.012670699	0.026037229	0.05820132	0.017794643	0.024103044	0.039436813	0.010082766	0.024188302	0.044369746	0.013416503	0.022576671	0.03820163	0.018741233	0.026809365	0.041809969	0.021680743	0.025598103	0.045064185	0.015360755	0.028772473	0.049222536	0.020807739	0.027285617	0.043195955	0.008253955	0.02472567	0.048922837	0.012793108	0.022783723	0.044490844	0.01376029	0.030880669	0.050225131	0.017518627	0.0290839
	339847	0.012060262	0.002114708	0.017977651	0.010990848	0.007623079	0.017387014	-0.01413183	-0.005827625	0.021756213	-0.015930165	-0.00375561	0.021381317	-0.014140486	-0.009213618	0.019268023	-0.014560879	-0.008622433	0.018899512	0.040890578	0.022541434	-0.011959125	0.043393154	0.020180622	-0.011874499	0.020555543	0.026089147	0.006124503	0.015691668	0.035415825	0.006369715	-0.009288094	0.000651576	0.028159685	-0.009878663	0.000911072	0.02800931
	361941	0.024284568	0.016610809	-0.005824013	0.029102065	0.014562556	-0.006198353	0.003662046	0.045908358	0.092504546	0.000395619	0.035264216	0.093104295	-0.000772329	0.02747062	0.074731581	-0.001005701	0.017100358	0.075403668	0.03579516	-0.018738376	-0.068729185	0.035923976	-0.004429597	-0.069833323	0.052586053	0.030825302	0.054537602	0.044015821	0.041182466	0.05432827	0.01990597	0.012237759	0.041000191	0.013320047	0.017737513	0.040871449
	365343	0.040899009	0.012923818	-0.015013784	0.042624302	0.015355635	-0.016170772	0.03350712	0.042691197	-0.00278253	0.027630351	0.04386089	-0.002131114	0.016376978	0.041167282	0.012358208	0.010981291	0.040529191	0.013289504	0.016105566	0.00288214	-0.013848652	0.016279619	-8.66E-05	-0.013481761	0.031496294	0.039593939	-0.007461764	0.02482133	0.041265715	-0.006278335	-0.000619566	0.023855327	0.035446875	-0.001550974	0.018633109	0.036342066
	366042	0.030063046	0.015995011	0.00709761	0.027848637	0.02216625	0.00788842	0.018122407	0.028480159	0.015737895	0.015153253	0.028617825	0.016598612	0.013502135	0.020277599	0.017125996	0.011456769	0.02092823	0.017638499	0.046758723	0.01560834	0.011916454	0.045134343	0.023091838	0.012538834	0.037790205	0.050269283	0.028570702	0.031583332	0.053746521	0.029787846	0.01859487	0.040940285	0.034877721	0.013596487	0.040314332	0.035696074
	371843	0.019715235	0.005057134	-0.006045147	0.016255558	0.016767945	-0.006079256	0.011566835	0.015359267	0.020151785	0.011313748	0.016209604	0.020446848	0.009135362	0.020799613	0.03148083	0.008843313	0.020351494	0.031693421	0.017867673	0.030721406	-0.02186745	0.016287478	0.026022596	-0.021730775	0.024162292	0.049669985	0.043584675	0.020870196	0.048601244	0.042977687	0.009167396	0.039335728	0.056776922	0.010041377	0.031432308	0.056875017
	377451	0.041190092	-0.007686848	-0.037158538	0.044522163	0.000718205	-0.03748716	0.029894512	0.043934222	0.017916191	0.027769383	0.044239655	0.018990563	0.015937896	0.014833623	0.011719061	0.019192953	0.010520467	0.011809133	0.038745865	0.059332073	0.059773795	0.034456667	0.060263049	0.06143051	0.022032952	0.088194288	0.072272487	0.01272978	0.086802579	0.074868463	0.008787251	0.053408593	0.071949206	0.00895666	0.041139714	0.073272578
	380036	0.06276878	0.040362675	0.009673873	0.05887175	0.05516484	0.009396017	0.034552842	0.046247404	0.037638791	0.031754259	0.050471909	0.037861627	0.014077744	0.024396481	0.039250795	0.013989858	0.023641588	0.039141227	0.03761166	-0.000763599	-0.005054207	0.04156518	0.010038379	-0.005679477	0.041750401	0.06052817	0.028107272	0.034718018	0.070374429	0.02853913	0.023889942	0.038287938	0.045699902	0.021156281	0.041103166	0.045457512
	385450	0.0521948	0.034155402	0.010743066	0.045786958	0.052092277	0.012106699	0.019812351	0.047798023	0.022645872	0.012057568	0.052233387	0.024938432	0.002247854	0.016681938	0.041363828	0.001984739	0.012995764	0.042262223	0.053981505	0.038756363	0.001857084	0.048744727	0.053677998	0.002838275	0.037272494	0.04597839	0.026415354	0.030483292	0.054548603	0.027859943	-0.005063402	0.00921974	0.040127736	-0.007432285	0.006708254	0.04114262
	386250	0.058326196	0.043933544	0.02168661	0.056644809	0.051487833	0.023497177	0.017742338	0.043929614	0.019528039	0.01245414	0.045098603	0.020908328	0.01782367	0.050708305	0.033812094	0.009046577	0.053672809	0.034934711	0.047881264	0.029005259	0.012855387	0.050038673	0.033037856	0.014547691	0.033766743	0.026199648	0.010854849	0.036274835	0.027246965	0.01253827	0.038391821	0.089405939	0.058590636	0.024880756	0.096369155	0.061696231
	390645	0.043746233	0.018434621	0.025343034	0.04656006	0.029076446	0.024333101	0.023974489	0.042346343	0.039098546	0.021191314	0.040279899	0.040115874	0.008270219	0.025265357	0.025932511	0.00480542	0.021934791	0.026739627	0.042261913	0.017877113	0.022577163	0.045592885	0.028305117	0.021416767	0.04314756	0.064058714	0.054875821	0.040102992	0.06484133	0.055825166	0.001818783	0.033659354	0.028560333	-0.001455156	0.023208888	0.030051285
	395958	0.029991588	0.013438947	0.023094228	0.030378986	0.018504957	0.023839673	0.014363457	0.008473601	0.023805857	0.015847366	0.008254564	0.024600239	0.013184936	0.009671694	0.024791054	0.015785538	0.007633005	0.02506702	0.054539893	0.03405619	0.031664681	0.058249746	0.035721652	0.030633247	0.036095712	0.027094165	0.042992633	0.039729357	0.02646444	0.043653682	0.003916977	-0.00453099	0.02401131	0.004419327	-0.002095915	0.025609659
	397154	0.078141846	0.018092893	-0.029851222	0.085390642	0.027675964	-0.030113317	0.020061081	0.022149164	0.00099419	0.020627515	0.018287446	0.002751141	-0.022286637	-0.006359486	0.015678668	-0.023335291	-0.01123936	0.016693641	0.07699246	0.034919467	-0.016111335	0.081720412	0.042365503	-0.016511494	0.044132471	0.046052106	-0.009339384	0.041449606	0.050186336	-0.008863783	-0.016395491	0.020764899	0.035297386	-0.018917087	0.011573185	0.036864396
	397760	0.051764198	0.022303371	-0.013516175	0.05012368	0.030585015	-0.012595245	0.029906601	0.047494162	0.029681314	0.025466507	0.043576397	0.030988049	0.010603929	0.03905984	0.031152243	0.008939312	0.033007387	0.032349378	0.043820906	0.016754478	-0.013316372	0.043382153	0.025841594	-0.012500349	0.033678133	0.043966092	0.008631493	0.031633332	0.04638226	0.01055578	-0.000687687	0.01794976	0.01859485	-0.000961864	0.016602533	0.020022783
	397861	0.047618859	0.003861392	0.015440091	0.048040725	0.012072954	0.014102618	0.027657323	-0.013429883	0.008084113	0.029633047	-0.008763451	0.007197431	0.022043375	-0.010455436	0.011529876	0.02355771	-0.006695864	0.010913719	0.062542148	-0.027816471	0.012195683	0.067523114	-0.017843822	0.010159576	0.065477528	-0.011815525	0.023411445	0.065364942	0.002790756	0.021923102	0.046045784	0.008821661	0.025114147	0.043817431	0.018896354	0.024375565
	412528	0.048332613	0.018714318	0.005069956	0.048076618	0.029632295	0.005075816	0.01715108	0.029566387	0.013290979	0.013771556	0.032325611	0.013578135	0.010210235	0.031436604	0.030318335	0.006818742	0.030866168	0.031064937	0.058130469	0.01101377	-0.008262086	0.057543658	0.026771972	-0.008242697	0.024631198	0.055788692	0.022113442	0.017606396	0.057493944	0.022470005	0.006767098	0.055162862	0.069839202	-0.001928395	0.051706746	0.071200006
	414229	0.09865161	0.044187468	0.015210081	0.104240008	0.058151923	0.013712817	0.050246757	0.039523128	0.015647018	0.050133135	0.044322643	0.015987368	0.038021728	0.012953564	0.007902618	0.042127699	0.017883873	0.007461403	0.088569552	0.077084817	0.0348101	0.086496845	0.08542794	0.034823809	0.064066783	0.06384182	0.028868614	0.061090674	0.067931034	0.02981296	0.056571081	0.045812059	0.024769664	0.057594582	0.049195655	0.025369748
	415837	0.008909111	0.008324155	-0.048469935	0.010309442	0.013151222	-0.04956755	0.023429947	0.044928286	0.017306846	0.021561034	0.043644749	0.017664535	0.032016966	0.052436706	0.049304605	0.0321678	0.047365978	0.049601212	0.026908755	0.027118646	-0.027126122	0.031774078	0.028378725	-0.027742494	0.024273219	0.039433829	0.002618667	0.027962763	0.037244353	0.002764553	0.032808665	0.052455127	0.042686284	0.03659483	0.04580139	0.043190755
	422632	0.0208489	0.023157215	-0.007221446	0.014754866	0.037624344	-0.005466603	0.005157964	0.024474123	0.013224158	0.002520196	0.028081439	0.014765294	-0.01388282	0.002027053	0.016498378	-0.014115278	0.000419978	0.016348474	0.031535532	0.019027736	-0.006443935	0.027608668	0.032568671	-0.004620281	0.017683199	0.022995532	0.015267511	0.015662897	0.033194892	0.016440453	0.024321368	0.014538912	0.02199957	0.02440211	0.016056219	0.023372449
	436239	0.057358321	0.021788388	-0.033366121	0.055581681	0.035876833	-0.034079511	0.031614378	0.028950382	-0.003768542	0.028201832	0.035573922	-0.003136567	0.010930255	0.023243256	0.028721044	0.009823019	0.02324925	0.029937027	0.039830633	0.011760212	-0.027066864	0.040214233	0.022941744	-0.02797758	0.035055045	0.030866954	0.004372024	0.033067394	0.038431142	0.003647771	0.000912732	0.0104554	0.030137762	-0.000144522	0.010272752	0.030891757
	436845	0.020516859	0.009100439	-0.005223869	0.01826595	0.018861672	-0.005193457	0.008379574	0.019586073	0.011137431	0.006979946	0.020352906	0.012274479	0.01211401	0.027655119	0.023838513	0.011229036	0.024864675	0.024955785	0.027207552	0.010081498	0.003423068	0.029056987	0.018454708	0.003129881	0.030289616	0.058613781	0.040246565	0.030321309	0.055802885	0.042310193	0.017628139	0.049100339	0.052829619	0.016483556	0.041446175	0.054112431
	445543	0.05498242	0.036174666	0.010087411	0.058540396	0.042823356	0.010812504	0.027709382	0.047697257	0.034309704	0.025529785	0.048329953	0.035196837	0.012857965	0.038796902	0.042009536	0.012651932	0.03523875	0.042726945	0.034618475	0.013536762	-0.001779263	0.03726849	0.020788841	-0.00105936	0.049765695	0.057370957	0.031043414	0.047175616	0.063805856	0.032220952	0.010443795	0.047655564	0.060314272	0.009403724	0.042000271	0.061170168
	448347	0.032568879	0.026798476	0.018935073	0.032931846	0.030236803	0.019648982	0.014255872	0.028000677	0.028200243	0.012862119	0.025255702	0.029032867	0.013396909	0.020334484	0.02398742	0.01304345	0.019267352	0.02470948	0.039777368	0.030648401	0.020307751	0.042803828	0.033616971	0.021287836	0.021339798	0.039979741	0.034556907	0.019959651	0.036325391	0.035704385	0.022491004	0.048845675	0.048932821	0.022833167	0.041934241	0.050623909
	479762	0.032945119	0.028827613	0.017493699	0.031315263	0.035517599	0.017854782	0.014620156	0.029635862	0.024461912	0.011553599	0.0317972	0.025999883	0.013952258	0.029724339	0.031474251	0.013248108	0.02885692	0.032542549	0.036562718	0.026211599	0.020975266	0.033979345	0.034488369	0.022043241	0.03625622	0.045226473	0.03036071	0.029547334	0.05254532	0.03211835	0.021574086	0.025702186	0.035092868	0.020520339	0.026479924	0.036060255
	480141	0.035910212	0.00508361	0.006862876	0.037951451	0.010219093	0.006400405	0.010641491	0.007025629	0.013275599	0.012658808	0.00440215	0.013393167	0.008204364	0.003526727	0.012134838	0.010271739	0.001017087	0.012215326	0.062261317	0.023811145	0.014380997	0.064345345	0.033374067	0.013842499	0.031053785	0.039673083	0.03689535	0.03095594	0.037217867	0.037334669	0.019087596	0.052030217	0.063378967	0.018844368	0.041044317	0.064564049
	485757	0.050276067	0.000206058	0.006240381	0.056976575	0.015818637	0.004430174	0.039164051	0.050123539	0.031607457	0.032107908	0.059709303	0.031561617	0.031572618	0.029709859	0.021742921	0.028801786	0.032543302	0.021080704	0.039534763	0.019725088	0.025249805	0.045304764	0.020472797	0.025359398	0.025387341	0.053343289	0.036461182	0.019932648	0.05168575	0.037941564	0.012946199	0.033288494	0.030037487	0.010300335	0.029067112	0.031009289
	486759	0.045029599	0.016232656	-0.001179728	0.049446024	0.023404773	-0.001628945	0.024864396	0.022929261	0.001123443	0.026144607	0.025789911	0.001543583	0.004268722	0.01123259	0.013768375	0.007073523	0.008297898	0.014653135	0.046233341	0.017225636	0.001593431	0.047034319	0.029138999	0.000675492	0.038058329	0.04139033	0.010228346	0.036576342	0.048894431	0.010349344	0.01826157	0.039248116	0.03232437	0.015836818	0.041339349	0.03286906
	497865	0.044483684	0.043706484	-0.005105381	0.035619494	0.055739202	-0.005154906	0.009498329	0.031041926	0.015805472	0.002913225	0.031743586	0.016544096	-0.003221461	0.017764607	0.018331451	-0.007138602	0.015186795	0.019146133	0.043681003	0.043338869	-0.009319379	0.034872398	0.056370035	-0.009347648	0.002996275	0.034509227	0.016131816	-0.006331683	0.033390399	0.017466737	0.042694453	0.043081764	0.028817127	0.04066734	0.049461707	0.028743748
	499566	0.01053583	-0.008557785	0.010368245	0.014941353	-0.009251521	0.010434832	-0.004906221	0.007503423	0.017596547	-0.004977153	0.003530096	0.017929729	-0.00819813	0.001763552	0.018848736	-0.006787842	-0.003314114	0.019165857	0.033119716	0.009083775	0.020160563	0.034524817	0.01445907	0.01998101	0.003148276	0.020331133	0.033147275	0.002365338	0.016584177	0.033514526	-0.007415047	0.003874055	0.03120937	-0.003681057	-0.002826632	0.031430647
	500222	0.032503381	0.055247866	0.0171683	0.024597017	0.063371442	0.01837365	0.009485066	0.040498998	0.01339589	0.002326656	0.043846082	0.014452509	0.007666059	0.026788762	0.029845031	0.00515828	0.027108287	0.030639319	0.042235043	0.046111502	0.029207481	0.038578779	0.0511875	0.029892791	0.023208234	0.054113913	0.017712157	0.014296673	0.059971284	0.018631749	0.02478816	0.04177634	0.05266862	0.023976592	0.039121941	0.053042982
	510326	0.039173372	0.063244671	0.01953231	0.037002895	0.064593427	0.020545684	0.022818979	0.052112307	0.026054304	0.019889737	0.051292222	0.027123757	0.01047121	0.031625804	0.03113194	0.007410029	0.032628912	0.03161161	0.000917566	0.00613845	0.004749218	-0.000985478	0.008004472	0.004946091	0.001027639	0.013292162	0.008579608	-0.001482181	0.014097707	0.008988362	-0.00598408	0.005108615	0.017155722	-0.008427317	0.006029318	0.017362958
	522434	0.062630661	0.045173511	-0.012874341	0.059087489	0.059173156	-0.013466697	0.042697176	0.052242327	0.006602905	0.039881423	0.057148039	0.006274948	0.023026556	0.034146953	0.014172727	0.022502521	0.034336086	0.01387963	0.068092622	0.05761471	-0.001038434	0.063892983	0.071851261	-0.00140285	0.064020082	0.074559063	0.007548212	0.058813896	0.08361496	0.007266943	0.025749989	0.072852589	0.048144933	0.025945822	0.066183642	0.048494238
	530635	-0.00922184	-0.002969299	-0.039187625	-0.015285818	0.002165782	-0.03835015	-0.002370003	0.018282782	-0.02317371	-0.006559931	0.020508312	-0.022034131	0.002119582	0.01873574	0.022072269	0.002962786	0.010334141	0.022443077	0.026043903	0.00551543	-0.009216509	0.028858576	0.015958767	-0.010025325	0.022946538	0.04120091	0.034414563	0.022722522	0.045898929	0.034314211	0.022790857	0.021720475	0.019934556	0.025627092	0.027483743	0.019398985
	531536	0.044158611	0.014085717	-0.012906358	0.037454791	0.030257728	-0.01167798	0.012758105	0.026415979	-0.010845263	0.008015214	0.026370307	-0.00900962	-0.013056939	0.002042845	0.009238551	-0.010541599	-0.00630052	0.010110023	0.061408322	0.027137386	0.00267499	0.06015534	0.037144527	0.00274925	0.014296665	0.035431549	0.002997358	0.008490998	0.035652526	0.004613349	0.002599217	0.020480923	0.04762233	0.004415632	0.012458232	0.047491077
	540436	0.07157217	0.073423408	0.024334779	0.069208831	0.08002793	0.026084971	-0.010987997	-0.002739723	0.010496109	-0.0099106	-0.006671051	0.010913323	-0.009764795	-0.00655264	0.012271263	-0.007675235	-0.010779136	0.012324064	0.073619425	0.076856405	0.02909022	0.069972247	0.084430255	0.030851264	-0.000731265	0.016876167	0.027144143	-0.000130429	0.013412108	0.028014474	0.017062031	0.032570716	0.031878989	0.016313829	0.031347979	0.033201229
	541943	0.018902037	0.011372383	-0.015049342	0.021276625	0.00886242	-0.013864724	0.017226074	0.022512933	-0.004111171	0.015804278	0.022530043	-0.003143818	0.010120372	0.022738483	0.006090691	0.00903907	0.020790813	0.006993316	0.012535795	0.003070339	-0.015936298	0.016916046	-0.00176476	-0.014614562	0.017818442	0.028612776	-0.002855791	0.016741959	0.02702862	-0.00105254	-0.005456522	0.012936045	0.011803378	-0.00456	0.006817483	0.013232748
	545345	0.057030831	-0.010847881	-0.012885723	0.060100764	-0.00085327	-0.013281344	0.028087387	0.022195049	0.003834161	0.025123958	0.02747358	0.00452742	0.016312705	0.000691583	0.006774076	0.017822675	0.002675236	0.006956188	0.065367341	-0.020555886	-0.018159153	0.069824718	-0.010979409	-0.018819397	0.039226122	0.050992936	0.011164988	0.030373422	0.065391101	0.012046786	-0.008057547	0.044433065	0.038390528	-0.014707483	0.046240702	0.039583083
	547046	0.042425115	0.042057842	0.024967112	0.047151778	0.041744269	0.026019586	0.020649277	0.026910786	0.021088814	0.023510467	0.024688523	0.021981273	0.017418517	0.023446269	0.019760644	0.019469693	0.021685662	0.020517759	0.048425127	0.049012557	0.033586025	0.053241007	0.048201807	0.034709409	0.042794596	0.060464434	0.044448137	0.0480479	0.054764912	0.046194438	0.034941394	0.052006103	0.041991737	0.038053531	0.047853056	0.043572117
	559053	0.05112787	0.049613636	0.026160955	0.047050159	0.057752691	0.027398976	0.034508277	0.049755204	0.032779068	0.030031828	0.052315608	0.034015272	0.01831061	0.027150922	0.023507854	0.017175464	0.026711846	0.024099905	0.057644118	0.059960984	0.038682546	0.052857433	0.066609524	0.040763296	0.048130807	0.071803883	0.043725271	0.041373454	0.075653091	0.045700409	0.030759215	0.048501149	0.032982949	0.027448861	0.049749747	0.034055647
	562446	0.061507802	0.032747369	-0.014463618	0.057875846	0.046504527	-0.013321408	0.029388713	0.038249299	-0.006291656	0.025541369	0.04309551	-0.005573669	-0.002158256	0.028392965	0.052582715	-0.002456505	0.023076611	0.053017002	0.080273882	0.031565815	-0.012642587	0.077316239	0.049977455	-0.011770125	0.051248785	0.045320719	0.003542895	0.045292415	0.058967125	0.004060056	0.005314186	0.024238661	0.06246984	0.006051526	0.025404772	0.063036621
	565452	0.044375528	0.04026863	-0.014323821	0.039206408	0.054535329	-0.014665941	0.013738495	0.04582566	0.001162261	0.006288085	0.051067188	0.001593371	0.001031766	0.024463577	0.018638272	-0.002133509	0.02329167	0.019007333	0.037030313	0.019389965	-0.004433768	0.032488164	0.031986527	-0.004922866	-0.000609399	0.035356447	0.03790313	-0.00569531	0.033663563	0.039417226	0.000794526	0.020745195	0.038195182	-0.002684425	0.02000461	0.038491625
	566454	0.036491234	0.026767913	-0.008226092	0.033164199	0.027594693	-0.007348396	0.020722734	0.046271272	0.02764466	0.015021354	0.041973054	0.028890384	0.000957291	0.031687122	0.036554534	-0.000127848	0.023870042	0.037761547	0.035255797	0.035680592	-0.000828588	0.032018751	0.034585096	-0.000124008	0.024278989	0.030312719	0.020726083	0.021808201	0.032932092	0.020959543	0.002534311	0.026004147	0.033398721	0.002254075	0.021047521	0.034020662
	567052	0.072165973	0.049013898	0.006667192	0.072779149	0.056678433	0.004955123	0.028907198	0.041733265	0.006497571	0.022608053	0.049278889	0.006845666	0.013571048	0.026206639	0.02325768	0.012925843	0.023943443	0.02296856	0.032158278	-0.014202327	-0.019627485	0.033096872	-0.000387308	-0.020494238	0.037640564	0.030590799	-0.001398276	0.033554018	0.04110878	-0.001612986	0.019753147	0.03362928	0.03442492	0.019773984	0.02937874	0.033469651
	567961	0.059993904	0.026915327	-0.006788463	0.053391363	0.042510375	-0.006242345	0.033152219	0.041103642	-0.006372808	0.027437339	0.047877479	-0.004805491	0.014581364	0.038779084	0.043504387	0.01132547	0.037728976	0.043905266	0.044904489	0.027307024	0.000292141	0.04135729	0.038052443	0.000218454	0.036150333	0.052294325	0.002996927	0.028539564	0.059851155	0.004544521	0.019853361	0.046108808	0.038854267	0.01686875	0.048284415	0.039349154
	568963	0.013139132	-0.041043222	-0.047061782	0.021293858	-0.040087413	-0.047912735	0.025410894	0.037460443	-0.00295395	0.021851977	0.03869224	-0.002453486	0.009684402	0.045542151	0.02583028	0.00676673	0.03969866	0.026781496	0.024649838	-0.03725731	-0.048022348	0.031514239	-0.032551851	-0.049364775	0.049120761	0.071277559	0.000850171	0.039403543	0.081583239	0.00038392	0.00703862	0.048273541	0.035704587	0.003295752	0.045593008	0.035422485
	570243	0.035137549	0.005309666	-0.024305532	0.035400715	0.014986467	-0.024369586	0.017114149	0.030375535	-0.006708407	0.017106526	0.026831266	-0.006162033	0.011841571	0.021690782	0.015348442	0.01185815	0.018394858	0.015548735	0.037289497	0.004955138	-0.030718116	0.036171146	0.016696174	-0.031097084	0.037418004	0.033245239	-0.02399192	0.03384354	0.03904907	-0.023597294	0.000465589	0.019963322	0.031249398	8.42E-05	0.013838586	0.030991858
	571548	0.019251324	-0.009252327	0.007942163	0.023493553	-0.004786459	0.006720204	0.025770824	0.002003633	0.020994088	0.030986546	0.005230498	0.019061763	0.016039399	0.014669411	0.020114735	0.017666465	0.016704461	0.019488154	-0.005487174	0.01543696	-0.008103979	-0.010942706	0.020355891	-0.006757108	-0.012129858	0.044002239	-0.005999037	-0.02005613	0.042271018	-0.003796759	0.004988961	0.009047034	0.010727733	0.002500059	0.012566465	0.010973523
	573249	0.037284367	0.005367605	-0.018757595	0.041414134	0.009449208	-0.018157072	0.014533817	0.032111157	0.010664948	0.011561418	0.033291917	0.011187627	-0.015923973	-8.67E-05	0.01595119	-0.017369721	-0.001293334	0.016622037	0.037018128	0.011572206	-0.016849328	0.039714783	0.014988512	-0.016065216	0.050499357	0.032785028	-0.00036607	0.049312063	0.04012239	-0.00025831	-0.015454491	0.002176726	0.00028521	-0.016787017	0.00103586	0.001138284
	573451	0.018244479	-0.001624684	-0.008625771	0.018527566	0.005750628	-0.009357308	0.009869568	0.028438674	0.0179212	0.005749756	0.031169033	0.018089896	0.001866818	0.016369043	0.031967636	-0.00064006	0.018389821	0.032143064	0.015528381	-0.018755091	-0.003556139	0.017695852	-0.011321982	-0.004651209	0.020876998	0.014999231	0.008938745	0.017889945	0.021479988	0.008609531	0.002696482	0.011973594	0.053509787	0.000430198	0.012410179	0.053440802
	580044	0.05253673	0.038948365	0.044022433	0.053808384	0.041483022	0.044856578	0.005246089	0.004946041	0.008504721	0.004935415	0.004781133	0.009414127	0.001679262	0.015610731	0.022500774	-0.000134765	0.012639384	0.023854038	0.048679173	0.039192639	0.044299845	0.049294718	0.041364335	0.045222547	0.02060334	0.02450018	0.028707346	0.019195367	0.025031175	0.029989244	0.035328064	0.060329229	0.070786275	0.031155134	0.058625933	0.07311441
	580347	0.017480131	-0.009487719	-0.005967533	0.02145539	-0.004919996	-0.007464502	0.009138014	0.021028297	0.032326017	0.004792279	0.025301872	0.032163914	0.005113619	0.00803611	0.024116125	0.003180134	0.010150428	0.024025112	0.030367423	0.001135971	0.016130032	0.036227506	0.003406039	0.014615187	0.03160001	0.015149253	0.03076241	0.034208231	0.019555589	0.029178506	0.018953012	0.016243448	0.033718586	0.020506704	0.018020011	0.032708649
	581349	0.050187562	0.0383741	0.046231832	0.053200938	0.041214641	0.045106228	0.035931852	0.030256243	0.035437245	0.038542677	0.031711549	0.03459233	0.024006277	0.021998109	0.025902357	0.026563194	0.022358775	0.025233926	0.054957762	0.055224095	0.048585299	0.059393164	0.055048179	0.047368176	0.05115737	0.055257883	0.04655879	0.054732025	0.05405625	0.045777585	0.042776953	0.036688305	0.048445545	0.046578713	0.037889764	0.047393367
	583858	0.019127706	0.014427653	-0.015096094	0.015973132	0.024329387	-0.014181501	0.005014084	0.026480902	0.002940862	0.001477597	0.030146802	0.003824699	0.001241094	0.02148317	0.022343911	0.000378435	0.020337539	0.022812895	0.068901271	0.010252798	-0.032706775	0.065628007	0.029497147	-0.032386817	0.053848505	0.015073709	-0.024809925	0.050006431	0.033649273	-0.02443045	0.030002348	0.007127041	0.014274969	0.030757159	0.014744615	0.014814847
	586460	0.052053347	0.012842298	0.00876403	0.05525656	0.019545667	0.008669298	0.031456631	0.037783489	0.012004385	0.025188083	0.044699416	0.012992788	0.018881787	0.041434661	0.026161401	0.013062265	0.043522071	0.027053542	0.050948124	0.021766204	0.001586271	0.049029361	0.032985833	0.000876063	0.037931278	0.055455785	0.019225284	0.029335044	0.064312629	0.019974303	0.018679732	0.049103696	0.03862289	0.013511385	0.05044771	0.03911021
	594156	0.054211263	0.003052525	-0.043542527	0.052007742	0.024094414	-0.043410014	0.009902612	0.03685702	-0.003581929	0.00075374	0.042665973	-0.001955719	0.014806621	0.042249702	0.040992733	0.014413758	0.037369825	0.041347627	0.033433776	0.03383192	-0.019355409	0.024510855	0.046881288	-0.018233562	0.035390519	0.042752109	-0.011727815	0.024077592	0.055473395	-0.010728182	0.060852051	0.071171984	0.013866258	0.053856462	0.080363564	0.013878927
	598568	0.037264049	0.035290182	-0.011095298	0.039656591	0.033579342	-0.011095114	0.031780295	0.034076698	0.009074423	0.031729151	0.033774335	0.009304114	0.028023142	0.029544549	-0.000723516	0.03181937	0.024290733	-0.000878219	0.049038749	0.036142375	-0.000919262	0.056676351	0.029702742	-0.001724048	0.046503954	0.048130751	0.009163007	0.051028606	0.042395428	0.008795276	0.037940938	0.053784247	0.03353148	0.040755298	0.048023358	0.033291299
	599469	0.017262248	0.011879038	0.028462639	0.018473323	0.016474072	0.026473602	0.009146087	0.034886781	0.03785976	0.005769998	0.034379307	0.038112149	0.010515711	0.023431774	0.029910309	0.01188681	0.019998534	0.029979173	0.02073027	0.007570347	0.012243527	0.021106251	0.012775164	0.010114335	0.022299213	0.046226893	0.053205155	0.023526167	0.040087268	0.052600276	0.014754347	0.033300553	0.035765909	0.014050734	0.030370478	0.036252439
	613538	0.033698875	0.03689906	0.023683634	0.030977437	0.043525364	0.02468995	0.023723913	0.02790329	0.014340902	0.023010975	0.031316295	0.014977132	0.023783969	0.032258634	0.024086809	0.022716464	0.03514583	0.02467153	0.046517059	0.047461711	0.030747015	0.042267833	0.05739281	0.032184944	0.040030554	0.043801699	0.024419943	0.036848005	0.051379569	0.025527228	0.03400211	0.038012177	0.028086739	0.033190019	0.042928226	0.028859288
	622236	0.049079176	0.029293764	-0.011629678	0.045456823	0.040275209	-0.01142781	0.029434176	0.024787605	-0.008744004	0.026551504	0.028652124	-0.008080099	0.007160373	0.012586082	0.017475035	0.008881801	0.007360091	0.017428888	0.042387638	0.014805268	-0.000750052	0.039537143	0.023082888	-0.00038442	0.052428424	0.046223234	-0.009257378	0.045437358	0.057535797	-0.008425344	0.007246246	0.022146918	0.034181818	0.005974598	0.024818815	0.03480513
	623844	0.023291463	0.044834286	-0.015408213	0.02366998	0.032098293	-0.012824739	-0.007097912	0.043778758	-0.000268316	-0.006817181	0.024205631	0.002859825	0.002801197	-0.004014856	0.029850876	0.000816412	0.004044509	0.029904529	-0.004321728	0.056305703	-0.011132584	-0.001113901	0.026525337	-0.007240232	-0.003792156	0.053234439	0.011327584	-0.001837448	0.032036826	0.014794846	-0.021007843	-0.002950938	0.035401113	-0.019173685	-0.010041331	0.036144108
	627549	0.049950205	0.013193639	-0.007931245	0.050315328	0.018939553	-0.008301787	0.018393038	0.021315023	0.013183775	0.014803712	0.022713266	0.013134714	0.010961656	0.015662709	0.028353635	0.009529215	0.012118497	0.028274372	0.059184667	0.026811831	-0.012793278	0.060088441	0.036044974	-0.012969512	0.015429772	0.024942258	0.001397617	0.009997858	0.026464438	0.001122073	-0.009523913	0.021603728	0.040007673	-0.009975982	0.011960704	0.039604671
	638049	0.03307946	-0.000506229	-0.032718971	0.03383166	0.005610758	-0.032185186	0.040390484	0.03114688	-0.00885368	0.036521081	0.039482571	-0.0085333	0.014935371	0.026966378	0.027032368	0.013362065	0.02790737	0.028062696	0.04031983	0.013132999	-0.01403667	0.040090047	0.022438856	-0.013289378	0.047440413	0.038457207	0.000935157	0.04142265	0.050151683	0.001444735	-0.000825962	0.040059473	0.04632169	-0.003966486	0.035714433	0.047518991
	645551	0.049995657	0.007117623	-0.041284651	0.048516661	0.022367904	-0.040894419	0.016671412	0.043511719	-0.008334028	0.013602057	0.043702938	-0.008044518	-0.000870865	0.026359376	0.01940636	-0.00185478	0.022769751	0.01949265	0.047222584	0.022635782	-0.028305547	0.045953088	0.035326827	-0.028612744	0.029365977	0.067905821	0.018592758	0.025188722	0.072254986	0.018816747	-0.010118537	0.037572179	0.048166733	-0.011251081	0.030252505	0.048259798
	654754	0.049191739	0.037026085	-0.037743114	0.037672479	0.059248559	-0.036696274	0.022336286	0.026750775	-0.006247834	0.017338289	0.032526229	-0.005264324	0.010205541	0.022944245	0.019086223	0.008748615	0.019304084	0.020178976	0.066715255	0.054309901	-0.013465495	0.059493516	0.075944796	-0.01294216	0.045988504	0.054805897	0.002607227	0.041703999	0.062902533	0.003301413	0.025458867	0.039677754	0.000553234	0.021411791	0.045429792	0.001490044
	665254	0.048684407	0.026389461	0.002855862	0.046700269	0.036154993	0.002572182	0.03613003	0.032419376	0.010399806	0.032365113	0.039593928	0.010363411	0.02671349	0.028523132	0.018025316	0.024784986	0.032595448	0.018041825	0.068353996	0.030486446	-0.001295086	0.065493889	0.044952441	-0.001974391	0.059196301	0.050301116	0.012233429	0.05271554	0.061782129	0.012069487	0.01734608	0.048043456	0.028944014	0.012645232	0.047362875	0.029430777
	672756	0.051821314	0.040810782	-0.010997348	0.047817525	0.049866799	-0.01015848	0.01809225	0.036539957	-0.010598266	0.013914172	0.038472652	-0.009223449	0.015132301	0.028682852	0.012262923	0.012578127	0.03001987	0.0133511	0.037860978	0.035319634	-0.007750138	0.034619145	0.042888612	-0.007469631	0.0177627	0.039210793	0.000898616	0.014735833	0.040143009	0.001919989	-0.008873596	0.02844773	0.004042094	-0.01225401	0.024573766	0.004961689
	677968	0.030334312	0.011060839	0.010924955	0.031369925	0.016976736	0.010825958	0.01122325	0.037166849	0.040624201	0.009497281	0.035474557	0.041871056	0.007218842	0.021216098	0.029074594	0.006002733	0.021699857	0.029457008	0.033527527	0.014939656	0.003374082	0.033449668	0.021051591	0.003408631	0.027578117	0.047780212	0.045864183	0.025995044	0.049012106	0.046951987	0.010972752	0.032004554	0.041426223	0.011294711	0.029653916	0.042158805
	679568	0.04013576	0.031397834	-0.002296518	0.032954477	0.042343818	-0.002098134	0.02375224	0.034157038	0.008132881	0.016566914	0.041301027	0.008704442	0.007968307	0.020450164	0.024139578	0.005130637	0.020530486	0.024361247	0.050274547	0.041103508	0.006118301	0.041938398	0.057117634	0.005899228	0.039233547	0.060579438	0.01045966	0.027966257	0.071561947	0.010923374	0.016766762	0.033341005	0.035470255	0.014055477	0.033402126	0.035384048
	683256	0.049593065	0.020501766	-0.031329039	0.047540445	0.035593897	-0.032013576	0.011254692	0.026445573	0.010338048	0.00730462	0.025430815	0.011360833	-0.00862791	0.01205174	0.031963412	-0.008921915	0.005995424	0.032604553	0.055546254	0.024487907	-0.028547948	0.05326651	0.040221985	-0.029319027	0.040012483	0.046621688	-0.007969038	0.028525813	0.06028007	-0.007498636	-0.01204956	0.018207707	0.061992265	-0.013809755	0.013148261	0.062371649
	685058	0.04002535	0.03762541	-0.011614214	0.040237498	0.039836902	-0.01241662	0.015328562	0.029286027	0.008092665	0.016239114	0.02594327	0.007934125	0.013238368	0.015213844	-0.012731081	0.011071936	0.01573007	-0.011812775	0.03888128	0.017225428	-0.032749604	0.033037487	0.026892994	-0.032555275	0.013878913	0.014123562	-0.008810862	0.003909168	0.020008674	-0.006836771	0.015906816	0.017319769	-0.025807707	0.009343228	0.019013142	-0.024461571
	695768	0.039968695	0.010242632	0.0095177	0.03799177	0.023853224	0.011136693	0.024852229	0.035506226	0.022117149	0.020633996	0.039448254	0.023665871	0.015230653	-0.001612207	0.011055319	0.017536458	0.001627677	0.011204993	0.015542279	0.029433854	0.00250489	0.008136874	0.035229124	0.004346887	0.01326049	0.039892759	0.017034236	0.005691268	0.042238157	0.018815864	-0.000748722	0.043968562	0.02908911	-0.007372233	0.039404109	0.031069735
	704238	0.041946992	0.006198376	-0.022998443	0.042686004	0.014536486	-0.022410227	0.015289661	0.032583322	0.012972371	0.011287645	0.032809794	0.013364599	0.021088157	0.017681662	0.013650602	0.021249807	0.01799877	0.013283944	0.047561947	0.017065074	-0.016720217	0.048267998	0.02607719	-0.016269771	0.017365128	0.044528406	0.004340306	0.011930561	0.0443139	0.005438094	0.017753541	0.040586304	0.02674471	0.014331825	0.0409046	0.02697427
	705341	0.058839936	-0.009616244	-0.019503644	0.066272795	0.00041333	-0.019235047	0.038603656	0.038700413	0.011408535	0.038950719	0.041726984	0.011871525	0.01379298	0.002430391	0.00207937	0.015871182	0.003484738	0.002318819	0.030050145	0.034705497	0.026898198	0.027621858	0.038350087	0.027215874	0.043031007	0.053312179	0.035406325	0.040440071	0.059657715	0.035700869	0.004234546	0.043332241	0.040711142	0.000716466	0.041541178	0.041253671
	709551	0.040308651	0.026077168	-0.024977842	0.041031644	0.02617166	-0.024010047	0.009590389	0.034073602	0.004859157	0.006585155	0.03260963	0.005868626	-0.008969005	0.014193576	0.025507668	-0.008300861	0.007805374	0.025978448	0.03707115	0.03493809	-0.024226077	0.034632642	0.035571486	-0.02268316	0.031131133	0.05234706	0.008229996	0.025885092	0.053859852	0.009284034	0.003575444	0.03954301	0.041921705	-0.000317366	0.035344888	0.042965997
	713239	0.036830079	0.028975852	0.021806052	0.037424866	0.030065319	0.022144534	0.022949124	0.024605395	0.012944377	0.023480006	0.022234257	0.013541203	0.023173641	0.022818608	0.01659875	0.023563894	0.02117851	0.017193949	0.03567211	0.028753454	0.017834738	0.036328424	0.029464981	0.018222131	0.026972851	0.023205452	0.00621722	0.027620601	0.021447821	0.007044819	0.024327049	0.020854494	0.010636769	0.025053233	0.018086527	0.011419605
	715647	0.032326631	0.008071181	0.01427255	0.033573996	0.015373215	0.014529592	0.036132723	0.033623692	0.039772026	0.033094361	0.036103971	0.040229999	0.028753554	0.031921268	0.034031499	0.025782032	0.03458751	0.03443215	0.00711826	0.032241229	0.009351137	0.000391657	0.030666456	0.01149747	0.022248432	0.070622399	0.056206316	0.013084888	0.06202988	0.057559859	0.014051705	0.052222326	0.043747436	0.006294487	0.04589384	0.044762343
	729254	0.043835942	0.026750991	-0.044586748	0.038667403	0.040577296	-0.044021197	-0.001718025	0.008704018	-0.025430813	-0.000948367	0.008983593	-0.024282452	-0.00799164	0.013996787	0.004932136	-0.006421465	0.008757322	0.005750644	0.040366899	0.007484266	-0.005075537	0.035554893	0.018487247	-0.004451811	0.008299696	0.007962331	0.012037762	0.006533754	0.007299448	0.012705378	0.00233178	0.006645779	0.042538505	0.004980375	0.000254083	0.042855512
	729557	0.027130898	0.031772438	-0.023835612	0.026274508	0.031851195	-0.022093505	0.014234985	0.029201673	0.012495671	0.011470145	0.027924079	0.013404888	0.009517089	0.016085787	0.018035563	0.007995453	0.017208859	0.017817521	0.024303168	0.037574969	-0.000657699	0.021734975	0.040156346	0.00058378	0.01672278	0.045290157	0.03400299	0.012087857	0.047870938	0.0343602	0.0014922	0.033891764	0.026674462	-0.002007387	0.036133967	0.026853628
	732243	0.058669616	0.044598058	0.026481679	0.063004501	0.044364214	0.026993873	0.029175168	0.040344696	0.017546283	0.029329786	0.037651874	0.018131496	0.014695172	0.038783655	0.026364874	0.01414906	0.032784503	0.027351066	0.065151811	0.041375391	0.025128329	0.070267133	0.041461702	0.025772991	0.059972879	0.061428647	0.02967806	0.061920576	0.059046589	0.030484689	0.034301825	0.064109847	0.053819492	0.033060379	0.056308243	0.055223875
	734045	0.019649338	0.003873571	-0.035938039	0.015511351	0.014918274	-0.03520821	0.038974516	0.031681087	-0.001397728	0.034686178	0.038635291	-0.000283403	0.033167679	0.015698111	0.026678657	0.031442065	0.0170366	0.027136529	0.000571157	0.015400676	-0.005219604	0.000854279	0.015603481	-0.004628701	0.044357967	0.051802456	0.012066826	0.040029518	0.059116576	0.013198356	-0.01387545	0.021894973	0.045366999	-0.011360873	0.0088898	0.046459403
	742549	0.026771711	0.030777892	0.030874508	0.028789643	0.032657996	0.032464772	-0.001915229	0.01487145	0.013356414	-0.000433202	0.011321031	0.014651741	-0.003300958	0.013548306	0.023528153	-0.000525621	0.008299935	0.024699457	0.009504468	0.009590548	0.031440768	0.007077633	0.016260222	0.031553734	0.00933165	0.036576018	0.041611418	0.008382259	0.033970058	0.043361712	-0.001145597	0.021889668	0.038254339	0.000746443	0.015490493	0.039498314
	748258	0.071475983	0.001290024	-0.022515813	0.072575875	0.017959023	-0.023711476	0.013241085	0.05209187	0.014142796	0.006833715	0.052216701	0.015281671	0.003623014	0.02559788	0.026812354	0.003725527	0.020540534	0.027475581	0.052455269	0.036185645	-0.011855357	0.04586095	0.050906505	-0.011609159	0.0307105	0.086436518	0.011992785	0.017493825	0.093323559	0.01360065	0.008527268	0.04622969	0.026319632	0.005020568	0.042330503	0.026989823
	751348	0.042250745	0.029902523	0.044783663	0.039607853	0.031912275	0.045502704	0.029839233	0.032566305	0.030083906	0.029208962	0.030760434	0.030587731	0.016015641	0.014437282	0.028800456	0.019216847	0.01115688	0.028111368	0.017021036	0.005261166	-0.00983863	0.017238444	0.012769333	-0.0091315	0.015168417	0.024819922	0.002597675	0.012647406	0.031717081	0.003326952	0.001383351	0.006388207	-0.005494674	0.002857228	0.010352759	-0.00552393
	761957	0.084885851	0.027730245	0.008704968	0.081857912	0.046447836	0.008045211	0.022324543	0.031272799	0.01291265	0.017299248	0.030367445	0.013444012	0.00127448	0.021965224	0.032145452	-0.000138203	0.014645079	0.032326065	0.051266722	0.05137014	0.031500917	0.047373131	0.057443634	0.031054717	0.058907475	0.072852343	0.043564029	0.048730493	0.07783623	0.04377358	0.008515825	0.03239717	0.051919084	0.004200322	0.028531514	0.05218628
	771354	0.05764693	0.015328494	-0.013939412	0.057093836	0.024970911	-0.01351665	0.041094542	0.077332705	0.062517479	0.031888194	0.081671387	0.063355476	0.014367383	0.038480408	0.044408523	0.010542745	0.035932831	0.044353493	0.057367221	0.058120124	0.032862108	0.052556463	0.067060791	0.0336558	0.054122262	0.097270586	0.068268456	0.044287361	0.1038002	0.069075644	0.028722249	0.080842473	0.075290315	0.022147585	0.077827044	0.074696258
	779370	0.035752635	0.035463002	0.011637114	0.036525205	0.037584294	0.013242644	0.006888667	0.030470014	0.003249061	0.005281436	0.028373623	0.004764913	0.00163616	0.018428598	0.0119929	2.28E-05	0.017817361	0.013001207	0.044772524	0.061689045	0.033425733	0.042094022	0.0620391	0.035322782	0.023590066	0.064750664	0.024980152	0.021021793	0.058988359	0.027058028	0.01852493	0.043328129	0.051497903	0.016963704	0.038468607	0.052038342
	782561	0.04967979	0.019614708	0.003401925	0.049554639	0.027305188	0.003708318	0.022058221	0.033439197	0.009960101	0.019617895	0.036437731	0.010917784	0.010649397	0.030592062	0.023974039	0.00800337	0.031499922	0.024827141	0.051262468	0.025687141	0.012661111	0.049868863	0.034552515	0.01294027	0.036219347	0.04697093	0.012211895	0.030769473	0.055272833	0.0130925	0.021801842	0.045669332	0.037290543	0.016520271	0.050134469	0.038172312
	784565	0.041048009	0.035912849	0.03184716	0.04235971	0.037449528	0.032296736	0.024456084	0.025710387	0.019762719	0.02516718	0.025374046	0.020177038	0.019179747	0.016003018	0.026033133	0.021572625	0.014342696	0.025907453	0.057878762	0.039917123	0.037391175	0.059980284	0.043188512	0.037436284	0.044291809	0.042945217	0.035799332	0.045336809	0.043271072	0.036144868	0.029343022	0.017513569	0.035277791	0.033402279	0.016774872	0.034636639
	788876	0.019356074	-0.004066417	-0.002030592	0.020395415	-0.001242259	-0.002127886	0.01941975	0.033235572	0.024308944	0.014722739	0.036796175	0.025079209	0.005169878	0.022691658	0.029402584	0.002472775	0.022780716	0.029885933	0.033251226	-0.008053821	-0.005519303	0.035467155	0.001329835	-0.005746871	0.042062435	0.02702404	0.015168754	0.039047614	0.037040468	0.015381814	0.013535831	0.023117285	0.041540604	0.010993157	0.025348142	0.041995924
	789373	0.018737134	0.04848874	0.026860887	0.011392319	0.055343084	0.028192233	0.018750506	0.05153171	0.031589478	0.014392481	0.053997893	0.032494877	0.012815722	0.049451921	0.038488604	0.010661387	0.047982816	0.039159507	0.01982047	0.047917563	0.022653196	0.014887108	0.053690597	0.023475597	0.030848868	0.077571116	0.050304864	0.023309652	0.082194678	0.051327378	0.018161522	0.066151448	0.055969901	0.012880598	0.065111935	0.057020027
	802844	0.030338684	0.045356367	0.036921229	0.02766634	0.043251161	0.037996098	0.021216225	0.046720702	0.044286236	0.020035781	0.038299229	0.044874266	0.008094952	0.024479743	0.034794632	0.009290152	0.017904891	0.034907624	0.026268788	0.024968619	0.018796623	0.024791522	0.028127111	0.018567424	0.037773475	0.064050503	0.055068884	0.034432739	0.059521314	0.055339362	0.023624858	0.029411424	0.036859039	0.023701517	0.028542511	0.036833137
	816653	0.04825503	-0.007396727	-0.020262478	0.049180351	0.001850083	-0.020292724	0.010973167	0.035519596	0.017833648	0.005724675	0.035623178	0.018563751	0.000867915	0.021866059	0.039752208	0.000454531	0.016599437	0.040357113	0.046064395	-0.005335908	-0.018298035	0.046656732	0.004723606	-0.018463982	0.026506905	0.040781807	0.003852205	0.020701645	0.047162462	0.004199314	0.016651366	0.044612747	0.060434457	0.013788095	0.040866632	0.061523303
	826353	0.043727078	-0.038565092	-0.033145495	0.053354256	-0.028253146	-0.036963988	0.033011235	0.014390645	0.004922707	0.033591054	0.017022748	0.004113424	0.023425875	0.02128705	0.024406066	0.023743207	0.02063442	0.023974873	0.062852271	-0.016685503	-0.020238856	0.069521144	-0.002639305	-0.024056317	0.045414969	0.054397754	0.035087917	0.040040884	0.060272187	0.035499755	0.026316514	0.040014852	0.040295534	0.025347253	0.038785111	0.039982125
	833148	0.058420602	0.015449082	0.005745101	0.062213805	0.026786402	0.004454736	0.034876335	0.032537825	0.02422026	0.033016589	0.038835682	0.024615608	0.021992961	0.020685168	0.025592642	0.018406831	0.028481564	0.025799012	0.031289253	-0.016195618	-0.019084848	0.032224301	-0.006551951	-0.020984674	0.051598348	0.020715177	0.006444202	0.051531937	0.028377956	0.006223247	0.031046964	0.02303637	0.023257766	0.025041347	0.03657794	0.022767782
	837560	0.075631961	0.084820084	0.046753082	0.063625604	0.097655162	0.049331382	-0.004487575	0.026361231	0.029487951	-0.010979246	0.027374772	0.03126581	-0.008002524	0.021741711	0.030238338	-0.012967787	0.020866385	0.031917736	0.109822117	0.106444784	0.049647473	0.100071937	0.11955332	0.051022258	0.018431166	0.054350387	0.041505791	0.009248973	0.057423521	0.043425217	0.003213476	0.050374903	0.046731696	-0.005102458	0.049989279	0.0492213
	837964	0.021962509	0.041611239	0.012542834	0.01373445	0.049284462	0.013808743	0.045181226	0.032725435	0.038116369	0.04193946	0.041064523	0.038821261	0.047917016	0.049537499	0.017865676	0.052071102	0.050227273	0.017990559	-0.018861514	-0.05191575	0.001822704	-0.025539899	-0.044248696	0.000949803	-0.041711077	-0.024485458	-0.000574534	-0.049029876	-0.022173481	0.000148942	-0.032161616	-0.013734217	0.012765114	-0.03791276	-0.015605519	0.013945066
	845458	0.055072751	0.027177522	-0.0277026	0.055673793	0.03613637	-0.027547659	0.026404671	0.033589859	0.000659777	0.025341392	0.034822468	0.001222805	0.005215091	0.029877845	0.032405108	0.004668616	0.025006117	0.033050824	0.044952631	0.019335674	-0.031734925	0.043996058	0.029055139	-0.031923849	0.052419223	0.041157071	-0.018066831	0.050304979	0.049974564	-0.017788665	0.00266879	0.039703995	0.068141185	0.003349335	0.031612698	0.068749689
	849971	0.043689761	0.016090978	0.027890673	0.047705103	0.017045328	0.0278704	0.035216231	0.030195905	0.04216804	0.033445507	0.03286057	0.042790685	0.030294584	0.030359941	0.047953468	0.028770613	0.030750059	0.048535522	0.045379702	0.010808278	0.034141876	0.048566438	0.014690482	0.034221888	0.030960642	0.017175661	0.028472044	0.030293042	0.021733917	0.029118536	0.032981403	0.014483329	0.035395391	0.032404136	0.01873441	0.035843052
	856766	0.028756496	0.014696751	-0.008977326	0.027642835	0.026731186	-0.007981291	0.017347883	0.016009888	0.008667373	0.014872523	0.021680905	0.01011981	0.005439078	0.004637664	0.019428017	0.003870562	0.00734717	0.020981871	0.020413941	-0.005770115	-0.003052286	0.018737486	0.006389486	-0.00160132	0.023252796	0.017101545	0.023514172	0.019933807	0.025557833	0.024540963	0.004782401	-0.00419381	0.023922931	0.002775839	-0.000250725	0.025489159
	857263	0.050843257	0.034917787	-0.013199843	0.047531907	0.050117619	-0.013870331	0.052470498	0.043108705	-0.011276971	0.0484192	0.051527146	-0.011240315	0.026013523	0.034314021	0.032561436	0.02777246	0.029381873	0.032924309	0.040602759	0.0264595	-0.019044006	0.038036305	0.038788021	-0.020299314	0.029702332	0.032125775	-0.006491263	0.026305463	0.039899651	-0.007942335	-0.004043517	0.021781996	0.030852806	-0.000887428	0.016468296	0.030725831
	859671	0.026227379	0.019856237	-0.003686252	0.028205046	0.019916739	-0.003631565	0.029238246	0.044155907	0.015844997	0.028447593	0.041404366	0.01677805	0.002123077	0.019622305	0.032196816	0.002092815	0.016461127	0.032475937	0.025248459	0.012883622	-0.009512526	0.025305556	0.01488384	-0.009452376	0.00919679	0.019724913	0.021726672	0.010085128	0.016972229	0.020824654	-0.001152409	0.013167756	0.030921211	-0.002440389	0.010791811	0.031432394
	861456	-0.009337417	-0.018636575	-0.030390298	-0.010114905	-0.013606532	-0.031980067	-0.007373368	-0.009111066	-0.022745231	-0.008365437	-0.004775015	-0.023962351	0.000717968	-0.001267507	-0.004826412	0.000515468	0.000519884	-0.005383659	0.027872868	0.026512686	0.014975941	0.031715345	0.021556737	0.016282324	0.009163825	0.025868624	-0.01349173	0.010241064	0.025405413	-0.013947529	0.00973113	0.02437022	0.012202246	0.011203123	0.0211694	0.012957395
	865363	0.03730233	0.010405215	0.000157551	0.036860362	0.024213919	-0.000452281	0.030765813	0.037898686	0.02852384	0.027198924	0.04248536	0.02892158	0.017053746	0.025679506	0.028021742	0.015946222	0.023946323	0.028525792	0.044432994	0.026496438	0.018941918	0.043269161	0.03589024	0.018406287	0.035528246	0.053011242	0.039948516	0.030514343	0.05454129	0.040572867	0.024065834	0.041323747	0.04048926	0.018535635	0.041271288	0.041544527
	871762	0.028946025	-0.00121255	-0.018879522	0.033158615	0.003181388	-0.018434875	-0.005670181	0.016892847	0.009773871	-0.012201194	0.016781881	0.010747935	-0.014299993	-0.003921491	0.019010892	-0.016235374	-0.006975857	0.019303981	0.030400408	0.043433454	0.011039162	0.029361155	0.04614931	0.011952639	0.0518138	0.0628132	0.026449924	0.051419191	0.068198189	0.026927145	0.018187935	0.042350914	0.064734645	0.017920174	0.041961655	0.065525003
	871964	0.053291034	0.010202661	-0.028585732	0.052686919	0.02038422	-0.027549313	0.029105471	0.045856453	0.002792167	0.02262966	0.051689062	0.004744872	0.004262323	0.039924182	0.042122219	0.001977762	0.037041727	0.043164533	0.039896544	0.017066944	-0.011705555	0.040216032	0.024149533	-0.010778879	0.03523954	0.048711322	0.01051355	0.029384663	0.056989994	0.011360634	-0.002086129	0.019471066	0.056649808	-0.001230978	0.015392384	0.055830713
	872158	0.034805134	0.003212209	-0.008043871	0.0385166	0.009178631	-0.009767459	0.030515283	0.067150354	0.013738158	0.023874557	0.063928902	0.015485581	0.010913637	0.038684644	0.021289954	0.007740695	0.032681819	0.022859031	0.011947149	0.021493034	-0.015660943	0.010482774	0.025355622	-0.016980218	0.008799897	-0.024098545	0.006700982	0.00957133	-0.011038868	0.004903594	-0.006338866	0.026143841	0.007516151	-0.012263888	0.028139725	0.007378595
	877168	0.039268229	0.031100608	0.019225085	0.039357949	0.033262271	0.018156767	0.037956186	0.045427654	0.028459582	0.035443097	0.046238188	0.027966157	0.026929926	0.033070847	0.030330276	0.026775651	0.030883517	0.030393973	0.046836037	0.013822934	0.013808728	0.05362976	0.013519445	0.012738543	0.0454298	0.039707791	0.02039317	0.044367723	0.040992115	0.02012616	0.01656392	0.014872498	0.021436343	0.018058369	0.012167848	0.021835025
	877269	0.036333513	-0.004565312	-0.012698571	0.037072729	0.007693532	-0.013737976	0.023499645	-0.006247669	-0.013895033	0.024459675	0.001199933	-0.014690115	0.013640661	-0.009834448	-0.011196422	0.014526953	-0.004174802	-0.011647223	0.037478589	0.019176118	0.018866768	0.036543768	0.026556831	0.018083978	0.029207464	0.039700583	0.029777741	0.026505258	0.041424818	0.029103622	0.022301005	0.037026916	0.035672631	0.019646309	0.037922632	0.03537504
	885975	0.057964429	0.025934299	0.009026822	0.06189445	0.029553276	0.009570372	0.032172333	0.021449046	0.003455775	0.032246765	0.023862597	0.004029087	0.030281272	0.016990541	0.009077066	0.032139577	0.018261416	0.009527338	0.073180124	0.03785127	0.017895907	0.077883027	0.041159816	0.018192569	0.038957492	0.039730616	0.014523362	0.038748682	0.039116792	0.014921914	0.030441236	0.037601043	0.037701033	0.030919775	0.0348421	0.038021516
	887373	0.060036357	0.038692843	0.006328092	0.057035342	0.056489106	0.006602789	0.034708235	0.04842874	0.013160271	0.030378312	0.055244882	0.014201953	0.023031369	0.037346996	0.029509323	0.020608941	0.038483754	0.030145947	0.057100102	0.043494999	0.018088739	0.0523922	0.060361877	0.018317707	0.053004265	0.066577308	0.027986906	0.047171686	0.077562764	0.029186334	0.008034864	0.014666683	0.029739223	0.008358364	0.009812535	0.030428205
	889579	0.024390686	-0.008298754	0.007861474	0.019603224	0.002596681	0.008126451	0.025616571	0.040645931	0.03125177	0.01891074	0.043161921	0.032051116	0.010835145	0.018093407	0.032614239	0.006482345	0.018446451	0.033194907	0.022182142	0.018054191	0.009455888	0.018507369	0.023865778	0.009894231	0.028475961	0.034440342	0.016227914	0.023576759	0.03951811	0.016982306	0.013520318	0.04066414	0.027045209	0.011443746	0.037758302	0.027215786
	894673	0.045760114	0.03235006	0.024205137	0.046544529	0.035569802	0.025845578	0.024137754	0.023250464	0.018518295	0.022799822	0.025766391	0.01920229	0.021959534	0.01858509	0.024602676	0.021550918	0.019577265	0.025013519	0.047069255	0.023266016	0.007283713	0.046613142	0.029809749	0.007445778	0.035583604	0.028946318	0.026375862	0.033931419	0.036197208	0.02591395	0.021028282	0.032382485	0.027689068	0.018491391	0.029523952	0.029551793
	896879	0.038619086	0.053641979	0.00959444	0.029575555	0.067773648	0.010125558	0.022189729	0.045109857	0.02222494	0.014354048	0.050816271	0.022570109	0.017102966	0.036311813	0.044671629	0.013822795	0.036353853	0.044560775	0.046454515	0.057660013	0.024593497	0.03804573	0.071804501	0.024619156	0.029748851	0.062900327	0.026808061	0.020394119	0.070776142	0.027349766	0.015775604	0.039896607	0.054124601	0.015156327	0.036364689	0.054226
	898176	0.023227083	0.013584144	0.004122631	0.024148783	0.011077031	0.00642816	0.023581089	0.020008994	0.015527307	0.024068765	0.018228404	0.016861947	0.019120164	0.011924909	0.009362117	0.019870397	0.010842948	0.010039535	0.02535616	0.018623425	0.01992462	0.025243632	0.016718591	0.022582702	0.036481716	0.03704346	0.038471367	0.033712666	0.03965494	0.039511263	0.02958541	0.039433703	0.065245979	0.02864169	0.038091086	0.066594385
	899885	0.025366081	-0.006554744	-0.018483212	0.022892851	0.007074515	-0.018689763	0.003569166	-0.016238663	-0.011260406	0.004977637	-0.01355802	-0.011573671	-0.01709353	-0.011179859	0.005287963	-0.01456999	-0.015524318	0.005499552	0.115390711	0.10803733	0.021261599	0.096556231	0.138433486	0.020406337	0.090740971	0.096440956	0.023736611	0.073427752	0.120636858	0.023300862	0.026456188	0.068796299	0.046550099	0.021174612	0.065352954	0.046719301
	901139	0.029465258	0.019555606	-0.004190535	0.035007451	0.018197507	-0.004733793	0.022610173	0.028150497	0.018757831	0.027221341	0.021022042	0.018943014	0.015053695	0.015490132	0.008079523	0.019164421	0.011997323	0.007955196	0.037579987	0.021262864	-0.004597784	0.043239132	0.022902539	-0.005202149	0.03583318	0.03126369	0.009695635	0.041044272	0.029268591	0.009156218	0.017924732	0.002376151	-0.017204056	0.0223599	0.006039733	-0.017970804
	901442	0.043156594	-0.009965882	-0.012601689	0.050146654	-0.000672903	-0.014110124	0.042739842	0.038222767	0.032647401	0.037468385	0.050322786	0.031993389	0.014570775	0.015614702	0.025344074	0.014511877	0.018646291	0.025235675	0.03888429	-0.018796686	-0.021140255	0.047628794	-0.011141376	-0.022497304	0.066873811	0.027232448	0.020010628	0.066992223	0.046265483	0.018252788	0.014094372	0.009373601	0.031889882	0.01728504	0.012271411	0.031245742
	904044	0.046454497	-0.010397453	-0.037184037	0.048425507	0.007006301	-0.038441032	0.009747205	0.03614774	0.006703638	-0.000247908	0.037656195	0.00760867	0.003111253	0.035044678	0.016595293	-0.00437923	0.032204069	0.017602611	0.05163468	0.000217716	-0.028473536	0.050586142	0.01721587	-0.0295176	0.029329631	0.044608068	-0.000333231	0.01719426	0.052273881	0.000200371	0.010706546	0.01946147	0.02361979	0.007223251	0.019784885	0.023481116
	907656	0.032390155	-0.006627661	-0.000291913	0.036272421	-0.002689254	-0.000614454	0.031521976	0.025620028	0.025357649	0.030765658	0.028677756	0.025137588	0.021639314	0.021193651	0.025042625	0.022018787	0.020727662	0.024959179	0.033651259	0.004698826	0.00783976	0.035820197	0.009150387	0.00815425	0.029973421	0.032462794	0.030662842	0.027218947	0.036029261	0.030455811	0.022405373	0.021028867	0.045776378	0.022843543	0.018049736	0.045955122
	910241	0.040244184	0.045837488	0.023899162	0.040166494	0.05117064	0.023499364	0.029875074	0.044789873	0.030542716	0.029236877	0.046918087	0.030424722	0.012174536	0.044093583	0.047637127	0.011486651	0.038975962	0.048032511	0.030421481	0.034814175	0.021340385	0.030058404	0.040353104	0.021026412	0.035081968	0.042562313	0.029696189	0.035135318	0.045301408	0.029154001	0.026197631	0.039920233	0.045168646	0.027426394	0.036228407	0.045054298
	917255	0.06792929	-0.005824801	0.00330219	0.068313494	-0.002218039	0.003705684	0.034558799	0.03115301	0.019608937	0.028682251	0.03188407	0.021196144	0.021614334	0.024709536	0.027740125	0.018334927	0.023198763	0.028785881	0.06941478	0.002654359	0.006002629	0.068370931	0.006749209	0.006440495	0.03533826	0.048025988	0.02163177	0.028048228	0.048145305	0.023774782	0.020663561	0.044659231	0.035934262	0.017339177	0.043376841	0.037284646
	922854	0.075683743	0.002458394	-0.010033057	0.074101046	0.025091186	-0.011285535	0.067882963	0.035284042	0.018847616	0.060471885	0.052511819	0.019142251	0.024133191	0.044855706	0.042311888	0.018261326	0.051399235	0.043302573	0.04658334	0.002546723	-0.019183042	0.04520788	0.012937907	-0.019928502	0.052374355	0.048493866	0.023346968	0.045287572	0.057133522	0.024060048	0.022340178	0.027563609	0.021663975	0.024880443	0.029131053	0.022333652
	930449	0.009700159	0.012895921	0.040393353	0.009453728	0.015437772	0.039120171	0.001816584	0.001675787	0.024379706	0.001132522	0.002275192	0.023639878	0.000690686	0.001885372	0.022041505	0.000207788	0.001746219	0.021539653	0.002818328	0.003771997	0.030499626	0.001385074	0.005773447	0.029179281	-0.002879434	-0.002339278	0.02574566	-0.00434519	-0.001435469	0.024583887	-3.76E-06	0.003850427	0.030736206	-0.00162321	0.004800896	0.029882381
	932554	0.057388112	0.035388164	-0.014326337	0.052452039	0.05230847	-0.014677864	0.021413336	0.021811398	0.007632038	0.019913824	0.024625681	0.008026606	-0.007366707	0.014787273	0.034111854	-0.0054896	0.007168685	0.033944774	0.055779535	0.032101631	-0.015729014	0.050660416	0.048403762	-0.016412314	0.049365953	0.0361677	-0.00637022	0.041767631	0.054172117	-0.006625449	0.012063789	0.016573885	0.02706209	0.009819009	0.022404013	0.026464295
	937160	0.046050809	0.021263694	0.001880251	0.045160785	0.027851332	-0.001098859	0.035318576	0.012262875	0.004936418	0.036387023	0.01485536	0.002266198	0.034189872	0.006236916	0.006787624	0.036710966	0.008766842	0.004639654	0.068140797	0.014603973	-0.002079403	0.071592808	0.022078611	-0.005461308	-0.007516653	0.03103137	-0.004579792	-0.013661169	0.038526762	-0.00189208	0.054812077	0.020436412	0.011450665	0.059219308	0.025538467	0.009282946
	957974	0.057864595	0.037551891	-0.005790134	0.058673192	0.04552155	-0.006861348	0.003293788	0.022366546	0.014230452	0.003834024	0.016685262	0.013392891	0.004050153	0.005624432	0.008634984	0.00613947	0.002400472	0.007524491	0.060311254	0.044538002	0.001816028	0.061472319	0.048537154	0.001526008	0.028249832	0.062540375	0.028765338	0.025452338	0.055889759	0.028701711	0.027293935	0.067671947	0.062578164	0.024051674	0.060913403	0.063369393
	958976	0.054642159	0.033662856	0.017757265	0.050396513	0.044964012	0.018813558	0.031169692	0.032992668	0.030005416	0.0292861	0.033816218	0.030480579	0.006662773	0.010397234	0.01503807	0.007271413	0.007731083	0.015031974	0.051850382	0.043505687	0.034431081	0.050766807	0.048541114	0.03483206	0.047459982	0.054151058	0.057425708	0.044152405	0.054629125	0.057821702	0.026126413	0.035904907	0.053390861	0.023787549	0.035455469	0.053139836
	959574	0.037276495	0.045740347	-0.005465653	0.033447109	0.055871677	-0.005449647	0.013624043	0.052872594	0.034962606	0.006363786	0.053854346	0.036888391	0.008495426	0.015377836	0.03637623	0.006918307	0.013705688	0.037138727	0.046172872	0.059027608	0.009072478	0.04147476	0.069780484	0.009375322	0.031391732	0.085859694	0.055409674	0.023843735	0.086370543	0.057185575	0.00973649	0.029322786	0.047361899	0.005114103	0.029651305	0.048673138
	965367	0.013425071	0.022536699	-0.00860465	0.006668164	0.032395113	-0.007803519	0.011293343	0.01680808	0.008635803	0.007576449	0.020266723	0.008887636	0.00892385	0.004990652	0.014903066	0.007841518	0.004734271	0.0146522	0.019440472	0.027690385	-0.004450791	0.013754759	0.03588945	-0.003638509	0.019600917	0.03067841	0.02388059	0.019927915	0.023835965	0.024479708	0.013767799	0.01772452	0.04006061	0.017478915	0.006050612	0.040493626
	965771	0.072496071	0.047710806	0.050534192	0.074633092	0.056938924	0.051169116	0.037440434	0.042335954	0.056255035	0.037570041	0.043342862	0.057359293	0.023924135	0.025593905	0.048602324	0.024358116	0.026223391	0.049468257	0.064550363	0.042748801	0.052117087	0.066117734	0.051552754	0.052713044	0.057174169	0.062215403	0.074270941	0.056492869	0.066103101	0.075397499	0.060452268	0.06496679	0.092838868	0.060074244	0.069356479	0.094247162
	978578	0.07885807	0.054809846	0.011041554	0.078258611	0.070786223	0.012822796	0.036678419	0.051302556	0.02245507	0.03405397	0.054601267	0.024179393	0.032513138	0.05523549	0.030771025	0.030270278	0.055527315	0.032563012	0.068645701	0.052146789	0.010524694	0.064895883	0.068696178	0.010864584	0.045718063	0.04976128	0.017826129	0.044470649	0.056336604	0.019252487	0.042217098	0.050775483	0.029577652	0.043120116	0.053483095	0.031122366
	983773	0.050022326	0.017857274	-0.005493584	0.044809807	0.036096271	-0.004568157	0.028626362	0.03541318	-0.001793118	0.026593329	0.036911134	-0.000299555	0.019286362	0.040242821	0.036725145	0.015672345	0.046386931	0.038122512	-0.000374939	-0.016052382	-0.015623861	0.005352801	-0.02615694	-0.015528	0.014576526	0.016265083	-0.009237986	0.018939154	0.004227218	-0.008474344	0.001020436	0.008960338	0.019738827	0.006938513	-0.006039871	0.020323798
	987983	0.087180726	0.049222901	-0.003469468	0.087276943	0.062976032	-0.004037512	0.036355641	0.0348638	0.003673723	0.033627629	0.038607094	0.004114033	0.018945849	0.02967797	0.019604834	0.017609024	0.029078336	0.020281587	0.074326932	0.040884666	-0.008863966	0.074446075	0.054189406	-0.009667521	0.071088873	0.061123658	0.000454259	0.066180848	0.071647838	0.000804071	0.047887575	0.061253458	0.042229746	0.045535784	0.063659795	0.04329478
	991267	0.038400006	0.059575718	0.009829306	0.031691886	0.063759752	0.010945211	0.029723167	0.0617938	0.02682809	0.026045591	0.061831038	0.028493602	0.00549252	0.018908041	0.029436488	0.008822141	0.015839683	0.029206075	0.034788366	0.023165189	0.019272378	0.031815041	0.029379044	0.019595409	0.041622665	0.074784011	0.035077192	0.032093789	0.080466941	0.037139222	0.019428993	0.030907491	0.037441008	0.016600749	0.03145624	0.037447527
	992774	0.076072261	0.018713592	-0.015209574	0.080371283	0.031884346	-0.015961571	0.052252457	0.038104024	0.000824905	0.051354375	0.045067765	0.00141751	0.027829524	0.019092698	0.019932104	0.028673504	0.020741109	0.019623419	0.099032715	0.048632264	-0.000118148	0.101682104	0.064558215	-0.00010942	0.056165911	0.060556002	0.022276228	0.052924175	0.067291006	0.023209428	0.017661562	0.04422237	0.045234919	0.0157037	0.041221607	0.045744035
