# Supplementary material for: Microstructural organization of human insula is linked to its macrofunctional circuitry and predicts cognitive control
Source: eLife. 2020 Jun 4;9:e53470. doi: 10.7554/eLife.53470 (PMC7308087; doi:10.7554/eLife.53470)
Supplement: Figure 7—source data 1. [file elife-53470-fig7-data1.csv]

subjId	rPI	rdAI	rvAI	lPI	ldAI	lvAI
101410	2.85702037811	2.7005648613	2.39695239067	2.91172027588	2.68291139603	2.3565788269
101915	3.52087426186	3.51365637779	3.33192014694	3.61146235466	3.46020579338	3.32763767242
102311	3.26500988007	3.19188380241	2.97315859795	3.38288378716	3.11824393272	3.01596069336
102816	3.38299918175	3.0875711441	2.78894591331	3.51815056801	3.08480834961	2.75602769852
103111	3.38419556618	3.1556725502	2.82176375389	3.60902643204	3.09306192398	2.80595397949
103414	3.54894638062	3.40043115616	3.16602897644	3.70938754082	3.37363433838	3.09754276276
103818	3.76018333435	3.39070224762	3.19827342033	3.9405105114	3.3273806572	3.21638250351
104820	3.2339785099	3.15566372871	2.84279036522	3.34951448441	3.07687425613	2.85102033615
105115	3.44838547707	3.1840069294	2.92745304108	3.45552825928	3.15713906288	2.86297154427
105216	3.14615106583	2.94598317146	2.79692840576	3.3579852581	2.88898539543	2.78332471848
106016	2.9383687973	3.01735281944	2.84694766998	2.96959733963	2.95594954491	2.86304521561
106319	3.02953600883	2.92089915276	2.73375964165	3.12674832344	2.8710911274	2.76957702637
106521	2.91705274582	3.03676509857	2.85296654701	2.97262215614	2.9801800251	2.87905359268
107321	3.10737466812	2.85606408119	2.73494911194	3.19381093979	2.83225607872	2.74566578865
107422	3.49471664429	3.27206349373	2.87379050255	3.5351061821	3.28442764282	2.80242037773
108323	3.01375150681	2.82013344765	2.60906457901	3.13885855675	2.73899412155	2.65541267395
108525	3.11738705635	2.95217251778	2.81464719772	3.22807812691	2.93873500824	2.77346611023
108828	3.24317383766	3.13117265701	3.01089167595	3.31833338737	3.08801579475	3.0204334259
109123	3.2851588726	3.10821652412	3.07676100731	3.3450782299	3.12915730476	3.08380126953
110411	3.20154905319	2.98211169243	2.84872865677	3.20182991028	3.00694417953	2.78488469124
111312	3.27387070656	3.03020238876	2.90679168701	3.36810326576	2.99574446678	2.94172096252
111413	3.85249972343	3.49322986603	3.18453741074	3.84129095078	3.53355455399	3.10311841965
111716	3.70007491112	3.50062561035	3.34117746353	3.84053993225	3.51918196678	3.31572532654
113215	2.99703884125	2.96421265602	2.60806798935	3.10917639732	2.90737819672	2.58218193054
113922	3.18148589134	2.78237199783	2.777135849	3.35769486427	2.76296567917	2.79399776459
114419	3.48459291458	3.22772264481	3.10343790054	3.62279129028	3.18803668022	3.04716277122
115320	3.51090693474	3.42542695999	3.37479019165	3.67392516136	3.39375400543	3.39468932152
116524	3.70080018044	3.24207925797	2.92685270309	3.82072472572	3.2336359024	2.87689495087
117122	3.45621943474	3.23577809334	3.13306570053	3.57860851288	3.19953465462	3.17546415329
117324	2.90019750595	2.65312981606	2.6875846386	3.03914189339	2.65311360359	2.74176168442
118528	3.01201701164	2.82937884331	2.6151330471	3.13353824615	2.79007077217	2.61652946472
118730	2.98818159103	3.07806181908	2.92484235764	3.04179668427	3.02221345901	2.90152978897
118932	3.24885582924	3.10136294365	2.99226689339	3.28608250618	3.04402065277	2.98996305466
119833	3.30389618874	2.96990847588	2.63884830475	3.41298532486	2.93706607819	2.60413432121
120111	3.24677491188	3.33025217056	2.91922664642	3.44686102867	3.17204666138	2.96091580391
120212	3.73457431793	3.61083555222	3.40205597878	3.85630846024	3.60648202896	3.35210561752
120515	3.85263323784	3.43783378601	3.24968457222	4.02167463303	3.46516156197	3.20912384987
122317	3.50557041168	3.24716353416	2.83047175407	3.61102676392	3.1781566143	2.82335352898
122620	3.49226903915	3.43350625038	3.16856741905	3.50793290138	3.37045693398	3.15372443199
123117	3.44862246513	3.02870106697	2.75354719162	3.60165858269	2.99371409416	2.70467782021
123420	2.97438311577	3.02196478844	2.75181531906	2.95746970177	3.06586813927	2.6987683773
123925	3.48055195808	3.1728386879	2.91411662102	3.62480807304	3.18982696533	2.80443763733
124220	3.1193985939	3.17714476585	2.97616672516	3.17200469971	3.16147994995	2.95298671722
124422	3.59120869637	3.47044658661	3.27330446243	3.70031166077	3.38881087303	3.31310558319
124826	3.28106808662	3.02117753029	2.84860754013	3.40811038017	3.00374555588	2.85766673088
126325	3.50708866119	3.2694132328	3.23756742477	3.65877461433	3.28493666649	3.20991778374
127630	3.14773464203	3.05273962021	2.81957483292	3.28993272781	2.96087050438	2.85814261436
127933	3.05476689339	2.94311237335	2.67287826538	3.12062549591	2.91232466698	2.67443823814
128127	3.34640049934	2.93434357643	2.94420099258	3.50554275513	2.95531511307	2.98754906654
129028	2.98996758461	2.84756970406	2.5828204155	3.07201147079	2.82957363129	2.53111577034
130316	3.3041164875	3.2244181633	2.9386613369	3.49173593521	3.16424608231	2.93788957596
131217	3.62245082855	3.34537124634	3.24834704399	3.68375468254	3.33877110481	3.25893878937
131722	3.63050198555	3.48704910278	3.15994238853	3.71016716957	3.38575577736	3.1656498909
131924	3.04911971092	2.87116932869	2.79720497131	3.20103788376	2.83091926575	2.81733345985
133019	3.52548241615	3.05624437332	3.02008295059	3.6819794178	3.04671835899	3.06728839874
133625	2.84654712677	2.8440451622	2.66735887527	2.90487575531	2.85929727554	2.60253715515
133827	2.90542769432	2.87319326401	2.67383646965	2.90500569344	2.87178969383	2.65894532204
133928	3.10209941864	2.72498250008	2.46076726913	3.23433542252	2.69310665131	2.43422651291
135225	3.37048172951	3.17890119553	3.0875442028	3.52722716331	3.19105935097	3.11379313469
135528	3.38828969002	3.39470696449	3.05017375946	3.5084631443	3.32981872559	3.09196329117
135932	3.3021364212	3.10210084915	2.93567848206	3.42539644241	3.08229422569	2.93286275864
136227	2.87101340294	2.82382559776	2.60027289391	2.95903682709	2.74737405777	2.62877631187
136833	3.1732852459	3.00948786736	2.79242157936	3.29203510284	2.97087144852	2.75237226486
137633	3.08107829094	3.17495083809	3.01112174988	3.13135027885	3.13582420349	3.01283168793
138231	3.47326421738	3.13836336136	2.85226297379	3.64265275002	3.1246445179	2.80854940414
138534	2.93507647514	2.90574288368	2.63620352745	3.03709292412	2.84470200539	2.65885257721
139233	3.08515810966	3.009100914	2.91182637215	3.14757609367	3.0655977726	2.86707878113
139637	3.17517495155	3.10782933235	2.98244404793	3.20950269699	3.08813428879	2.99524092674
140117	3.16608905792	3.18359255791	3.05261325836	3.22894263268	3.13255977631	3.03181505203
140420	3.44404363632	3.45463132858	3.09572792053	3.596752882	3.36747169495	3.10073804855
140824	3.02760720253	2.9938929081	2.91843986511	3.05022001266	3.02562713623	2.87609767914
140925	3.3675057888	3.17253518105	2.88900899887	3.38133025169	3.13102173805	2.89046049118
141422	3.25299358368	3.36155962944	3.13384032249	3.35319495201	3.3154706955	3.09476900101
141826	3.51919746399	3.20037603378	3.1276113987	3.74091529846	3.19606399536	3.15444564819
143325	3.55890846252	3.40278458595	3.14983582497	3.78308701515	3.33823275566	3.13926243782
144226	3.37985110283	3.27434682846	3.2088997364	3.3714761734	3.28261208534	3.18416666985
144832	3.04043698311	2.70543122292	2.52792406082	3.1268863678	2.69709277153	2.49914240837
145834	3.75180673599	3.39500117302	3.14805746078	3.86684346199	3.38707947731	3.1379134655
146331	3.44615602493	3.46001243591	3.13780760765	3.58176398277	3.38685965538	3.09234309196
146432	3.27651143074	3.01016139984	2.69269132614	3.37820696831	2.9626159668	2.65813779831
147030	2.6468873024	2.85320711136	2.66972541809	2.68444514275	2.84433746338	2.61654806137
147737	3.4493329525	3.23486065865	3.14147639275	3.58474969864	3.23096847534	3.10071635246
148032	3.14975190163	2.99942541122	2.79111266136	3.27793908119	2.97870349884	2.76207137108
148335	3.19665336609	3.06799149513	2.97761917114	3.37369275093	3.02406334877	3.00107932091
148840	3.51047277451	3.29239392281	3.13459420204	3.4891576767	3.27678513527	3.12557053566
148941	3.22705292702	3.0231628418	3.37860393524	3.33640551567	3.04260921478	3.47168445587
149337	3.25372815132	2.87141823769	2.7545068264	3.28195118904	2.90076899529	2.69342088699
149539	3.38399124146	3.1022913456	2.95008468628	3.47360277176	3.12457990646	2.84464883804
149741	2.9316778183	2.83000779152	2.63562059402	3.05750155449	2.79837036133	2.59942865372
150625	3.16398096085	3.1870367527	2.96513772011	3.16175818443	3.12645983696	2.96756887436
150726	2.65599703789	2.58348846436	2.46118021011	2.72283840179	2.57006287575	2.42378973961
151223	2.9971883297	2.98459458351	2.7785422802	3.05969977379	2.92060923576	2.79163813591
151526	3.09003329277	2.99190926552	2.8954782486	3.24550151825	2.95640873909	2.89663672447
151627	3.44206500053	3.16845273972	2.97739243507	3.56541919708	3.15505766869	2.97738242149
151728	3.48436069489	3.30911660194	3.14570808411	3.58618474007	3.250841856	3.16704392433
152831	2.66587090492	2.56524062157	2.37848210335	2.74374914169	2.61249899864	2.30254220963
153025	3.56628990173	3.21487736702	3.02093935013	3.67900013924	3.21439123154	3.02087473869
153429	3.21753430367	2.95021367073	2.7507724762	3.27945256233	2.98836302757	2.66744470596
154431	3.7671995163	3.48086667061	3.240660429	3.86265945435	3.46606373787	3.22918605804
154734	3.333111763	3.0702123642	2.85485506058	3.35065603256	3.05881261826	2.84023118019
154835	3.39284777641	3.32769727707	3.26552987099	3.3471159935	3.3613820076	3.21676206589
154936	3.26576662064	3.03473424911	2.65640354156	3.37699007988	2.96720743179	2.65003180504
155231	3.4386844635	3.20366382599	2.95571613312	3.58626246452	3.17619752884	2.94315886497
155635	3.28595900536	3.03102660179	2.96609377861	3.39165234566	3.06021475792	2.95507836342
156233	3.35229802132	3.00427889824	2.56855034828	3.60065436363	2.9284183979	2.51217794418
156637	2.99656581879	2.79731965065	2.58561754227	3.01157832146	2.79469442368	2.56187224388
157336	4.01209402084	3.50405359268	3.27157711983	4.19696998596	3.51394152641	3.22367882729
157437	3.76537871361	3.61213946342	3.40381813049	3.98411846161	3.58471989632	3.39862537384
158035	3.10083508492	2.89521813393	2.78744864464	3.21167802811	2.85574769974	2.79745197296
158136	2.98788547516	2.85424375534	2.69552946091	2.98063802719	2.84820699692	2.66551232338
158540	3.25199985504	3.0992102623	2.92679238319	3.36873078346	3.08282327652	2.90660500526
159138	3.22568416595	3.0271525383	2.78915834427	3.34247112274	3.02609920502	2.71801424026
159239	3.13624572754	3.12809896469	3.17836785316	3.22593450546	3.14358377457	3.2055990696
159340	2.7036087513	2.64264345169	2.56864452362	2.73569250107	2.63441753387	2.60505700111
159441	3.07267403603	2.9779548645	2.84308695793	3.1197180748	2.99413156509	2.79334187508
160123	2.86145877838	2.76280474663	2.59648919106	2.96775746346	2.71365189552	2.61134529114
160830	3.52412772179	3.21343803406	3.02220582962	3.68739414215	3.17600822449	3.04484844208
161327	2.89430236816	2.75512981415	2.70005321503	2.99036741257	2.73907876015	2.69731283188
161630	3.28354620934	3.11305499077	2.99659276009	3.24851632118	3.0894215107	3.00343871117
161731	3.36818695068	3.22408604622	3.11817193031	3.51829242706	3.215955019	3.07475352287
162026	3.52086567879	3.71742200851	3.62929844856	3.62689781189	3.72500920296	3.58236074448
162228	3.01667451859	2.80759549141	2.68395709991	3.09327721596	2.73948955536	2.69166111946
162329	3.61184477806	3.25022602081	3.1546869278	3.74797797203	3.27386212349	3.126942873
162733	3.14993524551	3.07917499542	2.83483052254	3.1894402504	3.03065800667	2.7961602211
163129	2.984136343	3.01220655441	2.8809659481	3.11399722099	2.98065662384	2.90467453003
163331	2.79881596565	2.77144908905	2.73310136795	2.86985969543	2.73377490044	2.74438166618
163836	3.62615942955	3.19514012337	2.8985118866	3.7257270813	3.18662071228	2.83902525902
164030	2.90953612328	2.95665860176	2.75701165199	3.02933096886	2.9032330513	2.70875716209
164131	3.33885192871	2.9014673233	2.76073408127	3.39521217346	2.91629385948	2.70738053322
164939	3.15423536301	2.98573160172	2.64612817764	3.22987413406	2.92349791527	2.63976931572
165032	2.72393488884	2.62458467484	2.33505725861	2.7576982975	2.57118153572	2.31593799591
165840	3.05776047707	2.90922236443	2.84205389023	3.14038896561	2.90666556358	2.85430026054
166438	2.99666905403	2.85551023483	2.76247620583	3.12439203262	2.85574817657	2.72345685959
167036	3.42762231827	3.46073389053	3.1520755291	3.54081845284	3.40663766861	3.19657611847
168341	3.28545045853	3.38272190094	3.28522157669	3.40022921562	3.37812638283	3.20840978622
169343	3.40933871269	3.11042761803	2.898011446	3.49330663681	3.10476255417	2.87763738632
169444	3.61067175865	3.30494475365	3.06839036942	3.75129055977	3.25003409386	3.11487674713
170934	3.29743432999	3.10749411583	2.91022157669	3.39308667183	3.06966853142	2.89343166351
171633	3.74801635742	3.48071026802	3.37801384926	3.93186187744	3.47770237923	3.36811995506
172029	2.87256193161	2.77210521698	2.81436920166	2.99184393883	2.75373029709	2.81928420067
172130	3.42134809494	3.37196111679	3.1216943264	3.5221657753	3.32861733437	3.05672335625
172332	3.75544190407	3.43402099609	3.1456656456	3.89383816719	3.38455891609	3.12865209579
172534	3.87198281288	3.37281346321	3.25323367119	3.99794864655	3.39379310608	3.26468062401
172938	3.36371397972	3.14580988884	3.08801603317	3.43927097321	3.15932655334	3.07980918884
173334	3.27076673508	2.81045818329	2.82495427132	3.32967114449	2.83899831772	2.85232925415
173435	3.73735165596	3.30131340027	3.2545068264	3.89694333076	3.29998135567	3.28249716759
173536	3.20212364197	3.08928513527	3.05079579353	3.34297275543	3.11824774742	3.08784294128
173940	3.22916960716	3.20687437057	3.01505970955	3.30136013031	3.15806794167	2.99564027786
175035	2.8520591259	2.70914745331	2.49579453468	2.84765076637	2.71562767029	2.46534776688
175439	3.51347565651	3.22017931938	2.87533164024	3.66515493393	3.1841506958	2.83633518219
176542	3.29277634621	3.14297366142	2.84836697578	3.50684571266	3.08691763878	2.84048247337
177645	3.75094079971	3.51573467255	3.45141935349	3.96844434738	3.52952933311	3.44439482689
177746	3.53695249557	3.56404185295	3.16314506531	3.70607686043	3.45793485641	3.212464571
178142	3.33174586296	3.37590742111	3.10956573486	3.34399366379	3.35550260544	3.04881739616
178849	3.06266975403	3.08827519417	2.64047193527	3.03942799568	3.01961326599	2.56296777725
179346	3.78438234329	3.77664804459	3.08866524696	3.84468364716	3.6368792057	3.01185631752
180129	2.91577577591	2.81800365448	2.62183690071	3.05856871605	2.79708528519	2.58575487137
180432	3.37788677216	3.24609589577	3.07209920883	3.5029065609	3.17773342133	3.12198781967
180836	3.48174118996	3.36977934837	3.1572060585	3.60875058174	3.29833912849	3.15026330948
180937	2.93220806122	2.87166166306	2.68883371353	2.98707437515	2.84039711952	2.61894750595
181131	3.37789130211	3.25952792168	3.13651037216	3.51909565926	3.26212501526	3.06754732132
181232	3.360227108	2.89833760262	2.79876208305	3.52822232246	2.87654447556	2.82215356827
182739	3.51788926125	3.32061481476	3.21140527725	3.64637756348	3.31990432739	3.20204591751
182840	3.6245033741	3.16832137108	2.90785336494	3.7596309185	3.13702607155	2.87639594078
183034	3.09745001793	2.79064822197	2.73310232162	3.24702167511	2.74702525139	2.75184249878
185139	3.34895539284	3.10820055008	2.96861505508	3.45437932014	3.06370902061	3.0356156826
185442	3.13247060776	3.02849721909	2.70104312897	3.20427966118	2.99601054192	2.63316583633
186141	2.88552284241	2.76847243309	2.51791238785	2.9809346199	2.71937584877	2.52506327629
187547	3.61651754379	3.42433452606	3.27184486389	3.74384903908	3.42868971825	3.2883181572
187850	3.20228672028	3.01275420189	2.87024712563	3.31793045998	2.98323917389	2.84707379341
188347	4.03181123734	3.46906280518	3.28086900711	4.18279981613	3.49058699608	3.28466033936
189349	3.10644817352	2.95078063011	2.83746218681	3.32529139519	2.93181204796	2.81018233299
190031	3.54579997063	3.41214799881	2.96554017067	3.67299509048	3.34833335876	2.94050121307
191033	3.12297844887	3.12450695038	2.97845363617	3.30951666832	3.06746482849	3.00256061554
191336	3.27600622177	3.12740111351	2.83337330818	3.33855104446	3.07970070839	2.81051969528
191437	3.45187711716	3.19292283058	2.95860958099	3.60929536819	3.12865686417	3.01961874962
191841	3.32214832306	3.08392333984	2.85489296913	3.36566519737	3.05214452744	2.84729576111
192540	3.16631627083	3.0868461132	2.94679474831	3.21658658981	3.09008288383	2.92825126648
192843	3.0784099102	2.95946669579	2.82689452171	3.22977757454	2.91793441772	2.81824660301
194140	3.7972111702	3.53156208992	3.09853434563	3.88034725189	3.46451425552	3.06886458397
194645	2.90736341476	2.74709701538	2.51323032379	2.95572161674	2.68849611282	2.54688858986
194847	3.54767036438	3.40069818497	3.06578660011	3.67014741898	3.36979627609	3.0793607235
195041	3.55666804314	3.29823350906	3.08029508591	3.60230183601	3.27578902245	3.08671975136
195647	3.83827328682	3.71998953819	3.38100075722	4.02861356735	3.66467452049	3.36614012718
195849	2.98679447174	2.99193096161	2.65031194687	3.03914570808	2.90280890465	2.66571784019
196144	3.58438062668	3.71566128731	3.39742279053	3.5872092247	3.66551685333	3.35666251183
196750	3.08649015427	2.96892642975	2.80901908875	3.25791621208	2.95965242386	2.79749464989
197348	3.52147841454	3.31079387665	3.21129155159	3.71495747566	3.33747410774	3.15554881096
198350	3.1705467701	3.09398722649	3.02879691124	3.24978494644	3.08927249908	3.03480410576
198451	2.92436552048	2.70666432381	2.52237677574	3.01809811592	2.68121528625	2.54165863991
198855	3.10097408295	3.11031031609	2.84994029999	3.26086950302	3.06802344322	2.83477306366
199150	3.22298955917	3.02727937698	2.92545843124	3.29386734962	3.03498864174	2.89008021355
199453	3.45210814476	3.10708665848	2.74970173836	3.57766747475	3.07207250595	2.76100277901
199655	3.26418304443	3.05213999748	2.75525283813	3.3355178833	3.03114104271	2.72921204567
199958	3.1002805233	2.83111715317	2.84041547775	3.13263058662	2.8695640564	2.85273528099
200109	3.66658234596	3.35496544838	3.09591436386	3.78036379814	3.26099777222	3.10992980003
200614	3.63270020485	3.37261152267	3.16383266449	3.71844911575	3.36725640297	3.17041492462
201111	3.06119060516	2.8268032074	2.24652814865	3.23571705818	2.70497655869	2.22520589828
201414	3.36193203926	3.00302600861	2.70328950882	3.57895040512	2.9456217289	2.70151567459
201818	3.14415001869	3.32824420929	3.16133856773	3.11840724945	3.31198906898	3.14558553696
203418	3.1295466423	3.10707569122	2.82075738907	3.12605977058	3.06917929649	2.7977013588
204016	3.31470346451	3.5096988678	3.07384490967	3.40293979645	3.41387104988	3.06174397469
204521	3.66185379028	3.31277871132	3.10060977936	3.79427719116	3.29276847839	3.10136318207
205119	3.53254628181	3.01393604279	2.97279858589	3.5783662796	3.04159808159	2.95725679398
205220	3.57625102997	3.25336194038	3.01003336906	3.75008368492	3.20500230789	3.0008251667
205725	3.41107964516	3.1528878212	3.16248130798	3.53907823563	3.13357615471	3.16260695457
205826	3.3417942524	3.08269262314	2.95130491257	3.39906716347	3.06307816505	2.96433663368
208226	3.43824934959	3.00235366821	2.82668924332	3.60659456253	3.02152585983	2.82876443863
208327	2.97666597366	2.69975972176	2.59507012367	3.14470648766	2.69924616814	2.59296107292
209935	3.20368242264	2.8073527813	2.76771521568	3.27894330025	2.7891638279	2.79796624184
210011	2.80765867233	2.83052825928	2.72058320045	2.9478623867	2.81953525543	2.68906950951
210415	3.49386453629	3.40198230743	3.20521354675	3.60619354248	3.33833456039	3.18244433403
210617	3.54730629921	3.02233409882	3.10989642143	3.65761089325	3.02877449989	3.14704537392
211215	3.00415921211	2.81224012375	2.66866374016	3.13358259201	2.79966449738	2.61624455452
211316	2.95111131668	2.62938523293	2.46762371063	3.03527784348	2.62486386299	2.45408558846
211417	3.37796878815	3.46086573601	3.21708774567	3.449467659	3.47267603874	3.11731386185
211720	3.0747051239	3.04809188843	2.69252252579	3.13795781136	2.99010562897	2.61980104446
211922	3.50395536423	3.35073018074	3.11892366409	3.66175174713	3.32120895386	3.11884570122
212116	3.19293379784	2.98058772087	2.67216229439	3.3987197876	2.94665312767	2.62140727043
212217	3.54476976395	3.5045273304	3.4717643261	3.66402339935	3.47292351723	3.52017903328
212318	3.49758052826	3.03362417221	2.96175599098	3.51513552666	3.08321738243	2.96461510658
212419	3.55325388908	3.42066192627	3.01303815842	3.78350734711	3.32700157166	3.01565599442
214019	3.80110526085	3.46981930733	3.17741084099	3.99219989777	3.46882581711	3.13587164879
214221	3.42487454414	3.19858646393	2.87646794319	3.4302842617	3.13453316689	2.82903695107
214423	3.14904904366	2.90357422829	2.78634953499	3.20993685722	2.9248893261	2.79323005676
214726	3.33146357536	3.20537137985	2.91789484024	3.4630317688	3.15925145149	2.86489081383
217126	3.29260993004	2.88111996651	2.69199872017	3.30530834198	2.89932394028	2.66572904587
217429	3.70276355743	3.45459723473	3.1989467144	3.77165913582	3.46906280518	3.15345549583
221319	3.3732624054	3.30625367165	3.14957976341	3.45106673241	3.27893304825	3.1480679512
224022	3.13867545128	2.93355369568	2.79969859123	3.24030327797	2.92438387871	2.79167747498
231928	3.55441093445	3.10926246643	3.07015967369	3.80186390877	3.13900399208	3.07052111626
233326	3.72173976898	3.12911534309	2.97669458389	3.90225696564	3.14263534546	2.96066761017
239944	3.26370573044	3.06045174599	2.97048664093	3.44836544991	3.00779604912	3.00606918335
246133	3.2230656147	3.29110717773	2.95481872559	3.25925183296	3.2281897068	2.98446798325
250427	3.41929507256	3.04318666458	2.97513008118	3.5038485527	3.04990148544	2.95927262306
250932	3.62495088577	3.51101827621	3.28452539444	3.6820731163	3.52373361588	3.20969176292
251833	3.13690137863	3.01363897324	3.0244512558	3.30489683151	2.98730516434	3.05329203606
255639	2.96106076241	2.86928582191	2.85574293137	3.11834001541	2.86584019661	2.82066988945
256540	3.43872189522	3.23432350159	2.95455670357	3.57476234436	3.20493412018	2.89884352684
280739	3.49367570877	3.25758361816	3.07554125786	3.63772797585	3.22977972031	3.07770109177
284646	3.13848972321	2.95239830017	2.7797961235	3.2203567028	2.92662191391	2.78476428986
285345	3.42633581161	3.18357348442	2.6354739666	3.53150820732	3.08223176003	2.59106016159
285446	2.81298565865	2.81942820549	2.83732819557	2.87664866447	2.81469583511	2.86524319649
289555	3.42043447495	2.99608016014	2.86886453629	3.53808116913	2.99585652351	2.85331392288
290136	3.07326889038	3.02524900436	2.94114565849	3.1703774929	3.00639605522	2.91375827789
293748	3.4633872509	3.06524944305	2.99445748329	3.57545518875	3.07969713211	2.99848794937
298051	3.13695025444	3.10241746902	2.87413883209	3.27318048477	3.05780673027	2.85503745079
298455	2.97729253769	2.84349584579	2.64820218086	3.0983440876	2.79850387573	2.64075279236
303119	3.58224987984	3.36031699181	3.03833031654	3.72751927376	3.33244299889	3.02562594414
303624	3.52757334709	3.2342312336	3.05596375465	3.56454443932	3.20504331589	3.04602479935
304020	2.87275314331	2.7553293705	2.61281251907	3.00147366524	2.69697713852	2.61384510994
307127	3.22268915176	3.15827846527	2.78632950783	3.38146710396	3.09938693047	2.72119617462
308331	2.90231442451	2.79973077774	2.58219146729	2.90398716927	2.79788565636	2.5854344368
310621	3.25520467758	3.12654280663	3.10777020454	3.44774746895	3.07214164734	3.15733098984
316633	3.17904639244	3.07927751541	2.91600322723	3.32322239876	2.98427700996	2.98631834984
334635	2.94043207169	2.87330389023	2.64282560349	3.06373238564	2.85086631775	2.64184427261
339847	3.86098265648	3.72941493988	3.29484891891	4.06400537491	3.65536141396	3.20572137833
351938	3.5931327343	3.05890417099	2.93678832054	3.76670479774	3.04440665245	2.93704009056
352132	2.962900877	2.99111104012	2.89572763443	3.05232715607	2.96524834633	2.91628861427
361941	3.47632312775	3.22292280197	2.96584868431	3.59227967262	3.17469906807	2.93474292755
365343	3.07883834839	3.08842253685	2.988976717	3.19199442863	3.08861374855	2.97897410393
366042	2.97979140282	2.95172047615	2.70869493484	3.00418066978	2.92702817917	2.70127129555
366446	3.18587684631	2.91631484032	2.51687836647	3.29578351974	2.8556933403	2.48243331909
371843	3.29806542397	3.14091062546	2.63754248619	3.42828845978	3.05501246452	2.6060757637
377451	3.70593571663	3.39872789383	3.3691778183	3.88133168221	3.38798165321	3.37367153168
380036	2.94534015656	2.82389807701	2.55808663368	3.04528737068	2.77860283852	2.52614021301
385450	2.77917075157	2.77093958855	2.62495207787	2.77677559853	2.76120591164	2.61113286018
386250	2.92033696175	2.79608631134	2.66407155991	2.99606871605	2.74020624161	2.69791579247
390645	3.02723169327	2.87406921387	2.69316792488	3.14373588562	2.85073518753	2.70586252213
395958	3.22234535217	3.04533362389	2.85412049294	3.32309436798	3.01227045059	2.83457875252
397154	3.15651011467	2.96372509003	2.92715859413	3.22211122513	2.96181821823	2.94016885757
397760	3.20842766762	2.99308633804	2.89317941666	3.29447293282	3.01923918724	2.8575592041
397861	2.98729228973	2.92043685913	2.74570584297	3.03611397743	2.881909132	2.72529911995
412528	3.67516231537	3.40855765343	3.03909373283	3.75888252258	3.36136364937	3.00529098511
414229	2.99203491211	2.72914838791	2.51935839653	3.05718064308	2.74605798721	2.50438141823
415837	3.32827115059	3.11258339882	2.76182723045	3.39115571976	3.08415532112	2.75113415718
422632	3.33696842194	3.5095770359	3.35154867172	3.37066197395	3.44503712654	3.39281249046
433839	3.37425589561	3.17090082169	2.86334586143	3.43187975883	3.12743806839	2.85678434372
436239	3.43038535118	3.48173761368	3.23082351685	3.54096269608	3.40388584137	3.21752929688
436845	3.78846073151	3.76660823822	3.55461096764	3.84727621078	3.73869156837	3.52751064301
441939	3.37318325043	3.36091589928	2.95287370682	3.41324353218	3.33889389038	2.88092827797
445543	2.76429581642	2.68856358528	2.70936799049	2.8311252594	2.71027231216	2.70905470848
448347	2.81713962555	2.64888978004	2.53638243675	2.96884703636	2.62526369095	2.54585647583
465852	3.05772137642	2.95841145515	2.88167262077	3.17623662949	2.93096518517	2.94757008553
473952	3.30856013298	3.23175144196	3.10994005203	3.35273241997	3.2346997261	3.09501171112
479762	3.09001588821	3.05350637436	2.86812710762	3.22003221512	3.02020335197	2.82459950447
480141	3.4190454483	3.18209409714	2.96461319923	3.55482363701	3.14293003082	2.99659466743
485757	3.24945831299	2.94959497452	2.58649849892	3.39201807976	2.88478970528	2.5921022892
486759	2.69661808014	2.73053574562	2.61147618294	2.69210147858	2.70485591888	2.6253721714
497865	2.79690504074	2.65195894241	2.30698132515	2.88550448418	2.6032538414	2.27710437775
499566	3.2925157547	3.09709000587	2.92993950844	3.48992466927	3.08559083939	2.90968561172
500222	3.05628728867	3.02722096443	2.83394670486	3.12669992447	3.02619290352	2.79801702499
510326	4.08011102676	3.48623204231	3.3492910862	4.33684110641	3.48958182335	3.36052083969
519950	3.35816764832	3.1919169426	2.84028983116	3.49184703827	3.13565182686	2.81009507179
522434	3.4589972496	3.35261106491	3.09261012077	3.68195319176	3.25978565216	3.15767049789
530635	2.91262531281	2.75472545624	2.75742292404	2.94840216637	2.74020051956	2.7588186264
531536	3.17485952377	3.04070568085	2.87324118614	3.30849552155	3.01632165909	2.86872029305
540436	3.27150845528	3.1691391468	2.84872722626	3.38671302795	3.12328863144	2.84084248543
541943	3.56110095978	3.13304114342	2.84535622597	3.64705252647	3.12246584892	2.82427501678
545345	3.06453180313	2.77643013	2.62922930717	3.16378259659	2.77006387711	2.58734965324
547046	3.98240661621	3.48629140854	3.30482053757	4.06310606003	3.49419498444	3.30577421188
561242	3.19383764267	3.06118917465	2.783598423	3.33212518692	2.99431586266	2.76094007492
562446	3.41317939758	2.93068194389	2.82510948181	3.63300418854	2.92197155952	2.84545469284
565452	3.44410252571	3.43339824677	3.18219876289	3.53095793724	3.35769701004	3.2200448513
566454	3.33498096466	3.18801379204	2.94353556633	3.37904262543	3.14321517944	2.98709774017
567052	3.24038767815	3.28779792786	3.01489949226	3.25118517876	3.22505521774	3.00243616104
567961	3.51683354378	3.43393278122	3.07297873497	3.70234107971	3.34758901596	3.08461165428
568963	3.43509888649	3.25002217293	3.00078415871	3.61000680923	3.24862265587	2.97149896622
570243	3.4644575119	3.41431283951	3.28665995598	3.55062866211	3.39358305931	3.29633045197
571548	3.14140176773	2.72841906548	2.25709342957	3.32251858711	2.65633177757	2.19033932686
573451	3.20412063599	3.16305327415	2.84343767166	3.2224817276	3.07837891579	2.85271525383
580044	3.29233908653	3.32988882065	2.97965216637	3.44283294678	3.2329916954	3.01907396317
580347	3.50224304199	3.26322579384	3.06597924232	3.63369941711	3.24821996689	3.07042956352
581349	3.45359873772	3.11556172371	3.09421348572	3.59599781036	3.12262225151	3.10764908791
583858	3.16528725624	2.92729997635	2.87232756615	3.28195166588	2.92274355888	2.87546396255
586460	3.34702324867	3.21357226372	3.01609945297	3.52333188057	3.20131325722	2.97380304337
594156	3.03776836395	3.03496384621	2.77566313744	3.11026597023	3.00517678261	2.77869391441
598568	3.89307951927	3.21201562881	2.99800634384	4.10276985168	3.20732498169	2.9352581501
599469	3.95846033096	3.43606090546	3.27006077766	4.20591306686	3.38947463036	3.29357147217
599671	2.98856639862	2.89001011848	2.69588589668	3.04336905479	2.8434317112	2.67417383194
622236	3.06988787651	2.87906074524	2.63638734818	3.09301161766	2.86469101906	2.63900518417
623844	3.00307583809	2.88590288162	2.51125788689	3.07475185394	2.79327917099	2.51426148415
627549	3.26769185066	3.20375227928	2.88915538788	3.52080059052	3.11040997505	2.87062001228
638049	3.2546312809	3.11652898788	2.86198496819	3.23875117302	3.0816245079	2.82194781303
645551	3.03737139702	2.78560352325	2.42048430443	3.06491827965	2.78118777275	2.36921167374
665254	3.86693835258	3.69521713257	3.14331459999	4.03125476837	3.59430384636	3.10272550583
672756	3.34440422058	3.06010389328	2.90859031677	3.41279101372	3.11160898209	2.8352868557
673455	3.57522320747	3.67612791061	3.44691181183	3.70885276794	3.62234544754	3.4137814045
677968	3.65413212776	3.39733457565	3.29209327698	3.64436769485	3.44936800003	3.26249861717
679568	2.83929300308	2.68303632736	2.64368081093	2.94760847092	2.69304394722	2.67246699333
680957	3.49129271507	3.12901830673	2.75020551682	3.64499545097	3.05140852928	2.77302479744
683256	3.34086275101	3.21903634071	3.11742377281	3.4179289341	3.19126939774	3.10037541389
685058	2.97661089897	2.8363904953	2.57046198845	3.02811193466	2.79936408997	2.57849264145
687163	2.82379770279	2.79109859467	2.66475129128	2.88079190254	2.76070857048	2.67890262604
690152	3.22665762901	3.04940056801	2.73096084595	3.38358044624	2.99003005028	2.70775508881
695768	3.47932171822	3.0059928894	2.84311890602	3.66069412231	3.00972056389	2.8227045536
702133	2.9104039669	2.95280218124	2.69857859612	3.02340435982	2.89001059532	2.6989300251
704238	2.82176542282	2.77051854134	2.83968281746	2.91446137428	2.75879359245	2.85062050819
705341	2.87104225159	2.73095297813	2.40205764771	3.06628298759	2.61265826225	2.44004559517
709551	3.03152394295	2.96113348007	2.75470471382	3.12334156036	2.92016720772	2.75099873543
713239	3.62851500511	3.37945890427	3.11593818665	3.71745347977	3.33748197556	3.05214047432
715647	3.32136797905	3.1063079834	2.85059070587	3.42989349365	3.11421966553	2.81836414337
729254	3.18841123581	2.95862460136	2.83467721939	3.29161596298	2.94275403023	2.77565336227
729557	3.744576931	3.50097060204	3.37624502182	3.91581368446	3.46199059486	3.38000822067
732243	3.50667786598	3.38746404648	3.42492318153	3.62619233131	3.37404084206	3.4888792038
742549	2.93099594116	2.89870142937	2.7428612709	3.00788998604	2.82297706604	2.7310385704
748258	3.17538571358	3.18266844749	3.01492333412	3.20655560493	3.10878014565	3.01344251633
748662	3.40680885315	3.14165353775	2.89573431015	3.60686230659	3.15500307083	2.84172224998
751348	3.12248635292	3.1113049984	2.75700211525	3.26570510864	3.02281761169	2.73836255074
756055	3.06080889702	2.92518496513	2.59237670898	3.1772840023	2.84040975571	2.62333846092
759869	2.84666776657	2.76402878761	2.44099664688	2.93247938156	2.69817328453	2.40932846069
761957	4.01648950577	3.71623730659	3.44248747826	4.03444671631	3.7131857872	3.41780090332
765056	2.97162175179	3.03065943718	2.80501437187	3.01731157303	3.00384998322	2.79765176773
770352	2.88035964966	2.87554216385	2.78484678268	2.97189998627	2.82459878922	2.87305998802
771354	3.04939842224	2.99388861656	2.8636841774	3.09205627441	2.98759937286	2.85362744331
779370	3.33183145523	3.15612387657	2.7754471302	3.45995020866	3.11265516281	2.7103843689
782561	2.91207933426	2.82831978798	2.63048171997	3.02530932426	2.75991773605	2.6450920105
784565	3.45452928543	3.37311220169	2.99020195007	3.54867553711	3.32126450539	2.9347243309
786569	3.11061477661	2.83438682556	2.94876742363	3.23507404327	2.8025829792	3.05281043053
788876	3.09343934059	3.18252015114	2.96158194542	3.06868386269	3.16507697105	2.95145845413
789373	3.35148119926	3.39351391792	3.11278986931	3.47542214394	3.34164524078	3.06047749519
792564	3.68040156364	3.52984285355	3.35312175751	3.77846479416	3.52883648872	3.31645917892
802844	3.56839299202	3.19836878777	2.8173058033	3.74526238441	3.12899398804	2.7673842907
816653	3.34644842148	3.24693083763	2.87294721603	3.35649847984	3.1816534996	2.85288619995
826353	3.90169215202	3.61860132217	3.41889071465	3.95970249176	3.66671681404	3.37075853348
826454	3.35316634178	3.24932527542	2.86773085594	3.45933103561	3.24667549133	2.7875020504
833148	3.09454536438	2.87071681023	2.69506239891	3.13040614128	2.89428043365	2.64911055565
833249	3.01198244095	2.94907641411	2.74676203728	3.12856531143	2.87894010544	2.7425262928
837560	3.02088046074	2.88942050934	2.67981719971	3.17655777931	2.85251402855	2.67239999771
837964	3.4389770031	3.4020755291	3.24099063873	3.49843025208	3.42909646034	3.15590977669
845458	3.20625209808	3.0162088871	2.76172685623	3.26894330978	2.99727916718	2.75830960274
849971	2.93254685402	2.94396424294	2.99882936478	3.0152964592	2.93240571022	3.04917049408
856766	3.49982190132	3.34945774078	3.02858066559	3.59982061386	3.28837633133	3.0055334568
857263	3.14733695984	3.15257096291	2.95366406441	3.13335084915	3.10681414604	2.96295452118
859671	3.41671466827	3.19966864586	2.9374730587	3.47977519035	3.19974994659	2.90931844711
861456	3.70177865028	3.53150367737	3.15627336502	3.75413417816	3.48602986336	3.13788223267
865363	3.21529555321	3.14090943336	2.93905878067	3.3675467968	3.07311820984	2.95889902115
871762	3.16525268555	2.84086084366	2.72470235825	3.20881223679	2.85346341133	2.74033331871
871964	3.15750646591	3.13531827927	2.79092478752	3.22013831139	3.09500741959	2.73042297363
872158	3.1005923748	3.06721782684	2.78579282761	3.11663341522	3.02642321587	2.78394055367
877168	3.9823820591	3.51154351234	3.29872202873	4.09134149551	3.50529146194	3.26233243942
877269	3.64493107796	3.46834754944	3.03835582733	3.78162050247	3.42492222786	3.00185394287
885975	3.39556837082	3.06573796272	2.94269990921	3.44846510887	3.05979752541	2.93657040596
887373	3.5670876503	3.43059206009	2.94133257866	3.66494488716	3.3807451725	2.87938833237
889579	3.22667050362	2.99558401108	2.93036603928	3.33207607269	3.01573729515	2.90277814865
894673	3.55421090126	3.25786542892	3.12073254585	3.7369890213	3.22830796242	3.136936903
896778	3.15165710449	2.99148368835	2.6544470787	3.28078985214	2.96048283577	2.63305234909
896879	3.39823913574	3.16202688217	2.98857760429	3.52573084831	3.14441752434	2.96903562546
898176	2.93211174011	2.86639475822	2.83118629456	3.02254605293	2.85972929001	2.81309771538
899885	3.64601182938	3.28572463989	3.03549432755	3.75833773613	3.26356244087	3.02078032494
901139	3.55028915405	3.4995265007	3.17064523697	3.56211566925	3.43045043945	3.19482135773
901442	3.34311413765	3.00616836548	2.76576399803	3.52027416229	3.00179719925	2.7200782299
904044	3.72384405136	3.73779630661	3.36081290245	3.93578529358	3.6422829628	3.3742146492
907656	3.2387945652	3.10118126869	2.9929485321	3.37126111984	3.08739876747	2.95589566231
910241	2.86829257011	2.92109751701	2.66109728813	2.99346351624	2.83098912239	2.59974074364
912447	2.86330342293	2.92978405952	2.78943538666	2.95698976517	2.89576029778	2.7570502758
917255	3.40088176727	3.34352850914	2.99860143661	3.40068817139	3.3100874424	2.89649057388
922854	2.98102498055	2.99723362923	2.9309258461	3.11870455742	2.96840858459	2.91543769836
930449	3.2249956131	3.19288635254	2.96359014511	3.27319741249	3.15276837349	2.96643829346
932554	3.37495923042	3.13904190063	2.90641403198	3.46542716026	3.09248399734	2.91621184349
937160	3.18770360947	2.89098954201	2.75801873207	3.24469828606	2.85024785995	2.74181723595
957974	3.24194669724	3.31760191917	3.10361838341	3.31366109848	3.27542257309	3.06494808197
958976	3.19635891914	2.98871541023	2.82261061668	3.2915418148	2.94900274277	2.84585618973
959574	3.34114480019	3.15430474281	2.96110534668	3.41221618652	3.12551474571	2.96827507019
965367	2.96923851967	2.74647450447	2.55928421021	3.06886768341	2.66234016418	2.58344960213
965771	3.00745558739	3.04755449295	2.91447305679	3.09196281433	3.03046679497	2.87789154053
978578	3.34878945351	3.28313183784	2.90169739723	3.50140500069	3.24588298798	2.84825396538
983773	3.16416025162	2.92335677147	3.08861804008	3.26246142387	2.98795294762	3.08467435837
984472	3.40933418274	3.18205523491	3.23415088654	3.46667265892	3.26608562469	3.1419043541
987983	3.03040099144	3.01372528076	2.86804151535	3.05890536308	3.01785540581	2.83826088905
991267	3.05916380882	3.03498673439	2.91306781769	3.14675569534	3.04216527939	2.86885023117
992774	3.40069270134	3.26522421837	2.93455934525	3.59708142281	3.17707228661	2.90312671661
994273	3.44733095169	3.30711627007	3.02126812935	3.65561485291	3.27832984924	2.95439338684
