# Supplementary material for: Microstructural organization of human insula is linked to its macrofunctional circuitry and predicts cognitive control
Source: eLife. 2020 Jun 4;9:e53470. doi: 10.7554/eLife.53470 (PMC7308087; doi:10.7554/eLife.53470)
Supplement: Figure 7—source data 2. [file elife-53470-fig7-data2.csv]

subjId	rPI	rdAI	rvAI	lPI	ldAI	lvAI
101410	1.52421617508	1.54525315762	1.4195741415	1.52156317234	1.53334665298	1.41805267334
101915	2.01900792122	1.93166005611	1.9338234663	1.98151707649	1.9967867136	1.94303870201
102311	1.7583220005	1.70700871944	1.66205108166	1.76080739498	1.71225690842	1.66120481491
102816	1.70806050301	1.69992244244	1.54562234879	1.70636820793	1.71009635925	1.56082868576
103111	1.77163767815	1.6845883131	1.58799338341	1.79925477505	1.71180737019	1.60120522976
103414	1.84206926823	1.85081923008	1.67777431011	1.87440609932	1.81753015518	1.68926441669
103818	1.89904558659	1.82025361061	1.77996146679	1.91104447842	1.82690870762	1.78442358971
104820	1.74274897575	1.61093485355	1.60256040096	1.7331469059	1.63709557056	1.60919356346
105115	1.79060173035	1.67520880699	1.61467087269	1.79589366913	1.69774639606	1.62236702442
105216	1.6182384491	1.57261061668	1.54958236217	1.59265482426	1.61317026615	1.55767691135
106016	1.60415351391	1.55658352375	1.58896791935	1.59069395065	1.57694005966	1.58524668217
106319	1.57242810726	1.51349747181	1.5334559679	1.53490006924	1.56819725037	1.53773164749
106521	1.64960968494	1.58081746101	1.58039140701	1.63937807083	1.6338057518	1.59852337837
107321	1.62968409061	1.55507850647	1.54820501804	1.63891863823	1.56130230427	1.55323183537
107422	1.85745060444	1.74183356762	1.59218907356	1.86379206181	1.79632401466	1.568125844
108323	1.62032461166	1.51288342476	1.51721060276	1.62138140202	1.54500842094	1.51887762547
108525	1.66828095913	1.64118850231	1.59647524357	1.6513286829	1.66780245304	1.60284864902
108828	1.69206607342	1.58240020275	1.62940263748	1.68499577045	1.60988032818	1.64197146893
109123	1.73036134243	1.67442619801	1.69895553589	1.69888281822	1.71560072899	1.69599676132
110411	1.65702784061	1.52146077156	1.50699949265	1.657143116	1.5200933218	1.50419723988
111312	1.70921623707	1.65005671978	1.68180608749	1.67699801922	1.67843723297	1.68987035751
111413	2.0788269043	1.83849990368	1.78596401215	2.10022187233	1.85963928699	1.78185129166
111716	1.87396359444	1.85150814056	1.86667299271	1.85139608383	1.89101839066	1.85322988033
113215	1.70070099831	1.58655750751	1.47034609318	1.69674575329	1.59063994884	1.46803998947
113922	1.57550346851	1.6198759079	1.57274758816	1.57454144955	1.62095415592	1.57169985771
114419	1.73720824718	1.70088684559	1.71531188488	1.73998034	1.7020418644	1.72162020206
115320	1.86129236221	1.846560359	1.85065996647	1.86122429371	1.83290410042	1.85825908184
116524	1.86171710491	1.62452399731	1.67901802063	1.89020431042	1.67357540131	1.67161226273
117122	1.84718871117	1.74234998226	1.74259459972	1.83432757854	1.76716923714	1.74846708775
117324	1.50348937511	1.52938377857	1.52972745895	1.51867103577	1.47956645489	1.53661859035
118528	1.60608685017	1.45482623577	1.50555825233	1.59402751923	1.50189745426	1.50307226181
118730	1.75007355213	1.72480726242	1.62087762356	1.7422991991	1.74236941338	1.63479602337
118932	1.738240242	1.69108569622	1.71501410007	1.74306190014	1.71279060841	1.72240865231
119833	1.67442631721	1.5696310997	1.4953019619	1.66669487953	1.62400281429	1.49234068394
120111	1.75245213509	1.69229471684	1.62849056721	1.71815371513	1.76291978359	1.64533400536
120212	1.96363759041	1.93269097805	1.84776723385	1.95008552074	1.98235607147	1.84427773952
120515	1.99776875973	1.85938334465	1.8607032299	2.01685619354	1.87979352474	1.84542965889
122317	1.82826519012	1.63625884056	1.62144899368	1.82436919212	1.69965958595	1.61824393272
122620	1.8525904417	1.94242811203	1.80140626431	1.84410822392	1.92853820324	1.81293153763
123117	1.68759691715	1.6426756382	1.54618620872	1.67383515835	1.67151403427	1.54115974903
123420	1.57653081417	1.48215448856	1.51679754257	1.58018624783	1.52178812027	1.51558971405
123925	1.77571833134	1.73984014988	1.60245096684	1.78246724606	1.74869370461	1.59416007996
124220	1.67760920525	1.79355192184	1.63248813152	1.6552259922	1.8077300787	1.62477505207
124422	1.82633268833	1.78471183777	1.82702958584	1.8114528656	1.79865884781	1.8347735405
124826	1.66990411282	1.66361773014	1.57628846169	1.66864132881	1.66802477837	1.5853369236
126325	1.81194114685	1.8340638876	1.82767438889	1.80298924446	1.83637201786	1.82099723816
127630	1.7516118288	1.60074055195	1.64279448986	1.73210513592	1.66679596901	1.64511728287
127933	1.53525578976	1.51596581936	1.49814200401	1.5321726799	1.55502283573	1.49186837673
128127	1.73062980175	1.6550039053	1.71741914749	1.74552452564	1.66984033585	1.70883893967
129028	1.52435863018	1.55688965321	1.44877827168	1.51308643818	1.56684589386	1.45030927658
130316	1.76586484909	1.7617688179	1.68511128426	1.75446760654	1.79154479504	1.70256114006
131217	1.88039147854	1.80132317543	1.85022747517	1.90036118031	1.80043315887	1.84899795055
131722	1.90414881706	1.82000076771	1.76810514927	1.89955806732	1.85450768471	1.77131438255
131924	1.56935298443	1.60646104813	1.6143181324	1.54592096806	1.62982571125	1.61718416214
133019	1.72341096401	1.67249917984	1.69870090485	1.72720873356	1.69110310078	1.71295309067
133625	1.57713782787	1.5973482132	1.48355424404	1.55646455288	1.60418117046	1.47936320305
133827	1.54580724239	1.48983061314	1.46576905251	1.55387973785	1.46108651161	1.48047816753
133928	1.54319918156	1.39734768867	1.38497173786	1.53826034069	1.42890167236	1.38490009308
135225	1.82876050472	1.77901566029	1.75375282764	1.81737434864	1.78985381126	1.74308180809
135528	1.85714495182	1.80268490314	1.73084974289	1.83470880985	1.86617851257	1.71152937412
135932	1.69742178917	1.68862330914	1.66884350777	1.67615485191	1.74866628647	1.65872454643
136227	1.47907364368	1.45416212082	1.4484885931	1.46772122383	1.48042225838	1.45303738117
136833	1.68143749237	1.64760959148	1.56891572475	1.67943036556	1.67404294014	1.56029880047
137633	1.71053433418	1.68451178074	1.65920352936	1.67540431023	1.72048985958	1.67337727547
138231	1.75296270847	1.63585948944	1.56796765327	1.77108943462	1.65942513943	1.56860876083
138534	1.62275362015	1.46619927883	1.48956859112	1.61678934097	1.5044990778	1.48355138302
139233	1.6336915493	1.65808796883	1.59584784508	1.61865413189	1.66185200214	1.60372245312
139637	1.72015976906	1.70193243027	1.66695058346	1.7025282383	1.72805583477	1.6654869318
140117	1.70682561398	1.69041395187	1.7446013689	1.70221960545	1.70593082905	1.73069667816
140420	1.88949716091	1.77942025661	1.72634398937	1.88968789577	1.84554231167	1.73042488098
140824	1.59056293964	1.68415665627	1.57042121887	1.58258414268	1.64351379871	1.5732396841
140925	1.78761708736	1.67005741596	1.63444495201	1.81432199478	1.66947102547	1.62884473801
141422	1.81638491154	1.8383821249	1.63992917538	1.7881603241	1.83462238312	1.63772678375
141826	1.77139413357	1.76383554935	1.67251598835	1.78471398354	1.74504411221	1.67270064354
143325	1.88885462284	1.85284018517	1.77966761589	1.87204945087	1.87554788589	1.77327167988
144226	1.83127653599	1.85764849186	1.81272876263	1.81087839603	1.86306810379	1.81152200699
144832	1.58833789825	1.4135324955	1.38928163052	1.59400868416	1.47311842442	1.38689267635
145834	1.95976471901	1.8898422718	1.78115713596	1.97070217133	1.89539933205	1.79429042339
146331	1.92320156097	1.73972380161	1.75431311131	1.91672980785	1.80354356766	1.74845480919
146432	1.63343334198	1.63000535965	1.50621390343	1.6376106739	1.63169181347	1.50913870335
147030	1.50140047073	1.60939490795	1.45579051971	1.4814312458	1.59260606766	1.46395397186
147737	1.75426781178	1.74794113636	1.67377412319	1.72538936138	1.77131974697	1.67953550816
148032	1.67122459412	1.68530476093	1.55307340622	1.6743465662	1.66175198555	1.56801831722
148335	1.71064424515	1.62216508389	1.61902928352	1.68130135536	1.68359875679	1.61960148811
148840	1.83261942863	1.88355445862	1.72977471352	1.81792867184	1.92208361626	1.74006605148
148941	1.69007074833	1.77120745182	1.87465214729	1.69368445873	1.76111710072	1.87446308136
149337	1.65107607841	1.62360990047	1.49257302284	1.67823886871	1.62406730652	1.50354290009
149539	1.79733526707	1.7684969902	1.61503052711	1.76663601398	1.7925542593	1.61265063286
149741	1.64497494698	1.51744151115	1.46933662891	1.64572107792	1.54894948006	1.46750283241
150625	1.74183273315	1.71073460579	1.58833062649	1.74885725975	1.71515738964	1.59885418415
150726	1.42307841778	1.42310905457	1.32636773586	1.40943396091	1.42817020416	1.32458972931
151223	1.69882297516	1.5936923027	1.58727419376	1.67528486252	1.64679586887	1.60012948513
151526	1.65694224834	1.65022230148	1.5904006958	1.62129795551	1.69781064987	1.59379684925
151627	1.79989409447	1.69802320004	1.70080685616	1.79233360291	1.75077521801	1.70110285282
151728	1.85798418522	1.80811536312	1.75068259239	1.8502753973	1.83055567741	1.7531015873
152831	1.39757847786	1.37587070465	1.26707565784	1.41295325756	1.37303209305	1.25471246243
153025	1.83549010754	1.81720423698	1.76560592651	1.82382535934	1.84988117218	1.7606831789
153429	1.63194072247	1.56538975239	1.50402975082	1.63646602631	1.58143389225	1.51293456554
154431	1.85468113422	1.7793456316	1.83397507668	1.84024608135	1.81366932392	1.82985711098
154734	1.69111704826	1.63192462921	1.54184186459	1.71426129341	1.62443768978	1.54873669147
154835	1.89850723743	1.82012188435	1.78403866291	1.87806546688	1.85749864578	1.79126679897
154936	1.67367887497	1.56278395653	1.52371168137	1.66562724113	1.62259101868	1.51677155495
155231	1.81555557251	1.78351378441	1.67859566212	1.80779325962	1.80483579636	1.67889714241
155635	1.65233206749	1.68389892578	1.68944597244	1.64844548702	1.67889416218	1.69040596485
156233	1.71673929691	1.59286618233	1.43789112568	1.70797014236	1.62548863888	1.43428599834
156637	1.59118402004	1.45433533192	1.47254419327	1.59003400803	1.46868121624	1.45710992813
157336	1.9263150692	1.78280580044	1.83387827873	1.92741966248	1.81113088131	1.82183134556
157437	2.01624345779	2.02203249931	1.83282220364	1.98590648174	2.04789733887	1.85635113716
158035	1.58093965054	1.57771420479	1.56057572365	1.58345460892	1.57861471176	1.5615695715
158136	1.69572651386	1.52526521683	1.56606054306	1.69671654701	1.55487191677	1.56410264969
158540	1.72453451157	1.71992444992	1.67804825306	1.73035728931	1.72072374821	1.67248666286
159138	1.76426064968	1.57499313354	1.5492875576	1.77365136147	1.5872836113	1.55221319199
159239	1.69066619873	1.70379579067	1.77650010586	1.67815601826	1.69316482544	1.78469514847
159340	1.45818483829	1.45487093925	1.48507118225	1.45548582077	1.45072233677	1.49242854118
159441	1.66148388386	1.61457037926	1.60439503193	1.64948642254	1.62625801563	1.60773253441
160123	1.52480244637	1.5343132019	1.44519901276	1.50787866116	1.55460000038	1.45510351658
160830	1.85348463058	1.73872005939	1.75410413742	1.83242535591	1.78681266308	1.74471759796
161327	1.52990627289	1.44986355305	1.51511251926	1.51595342159	1.47940635681	1.51041388512
161630	1.70737099648	1.6622338295	1.68791544437	1.71729397774	1.67677545547	1.68423819542
161731	1.80775439739	1.70929288864	1.72853648663	1.81054723263	1.70506215096	1.72342073917
162026	1.96253585815	2.119535923	2.00762271881	1.93030250072	2.11450386047	2.0024971962
162228	1.59246349335	1.39450287819	1.54595899582	1.59872579575	1.43623757362	1.55524682999
162329	1.76894330978	1.82149672508	1.73667502403	1.75534820557	1.83973395824	1.73730695248
162733	1.71201121807	1.56252598763	1.57545030117	1.72220420837	1.59218525887	1.58241295815
163129	1.58775389194	1.64427912235	1.59003007412	1.54825091362	1.67398095131	1.58554518223
163331	1.44844889641	1.55126512051	1.49825274944	1.4352285862	1.55454242229	1.50710570812
163836	1.79230761528	1.70719575882	1.54598295689	1.81907725334	1.71101748943	1.54779744148
164030	1.57169127464	1.59748578072	1.51965248585	1.5422898531	1.65857625008	1.51707661152
164131	1.738540411	1.59886741638	1.61143493652	1.73813557625	1.61837422848	1.60417437553
164939	1.70458173752	1.61923205853	1.48585426807	1.70480501652	1.65669357777	1.49659049511
165032	1.49125087261	1.2337692976	1.33690142632	1.49877524376	1.29544842243	1.33639550209
165840	1.51426327229	1.56947946548	1.54583215714	1.49861633778	1.55753743649	1.55348706245
166438	1.62261033058	1.62162876129	1.5440839529	1.61134171486	1.64897406101	1.53937315941
167036	1.85744762421	1.79831540585	1.7670006752	1.87172985077	1.82314312458	1.76661574841
168341	1.76132726669	1.94046533108	1.75144815445	1.76602911949	1.92083883286	1.76015329361
169343	1.83306539059	1.72281038761	1.67383241653	1.83009552956	1.73478543758	1.68145775795
169444	1.83516538143	1.76329803467	1.75751376152	1.84132349491	1.79169368744	1.75562787056
170934	1.77841365337	1.75106835365	1.63342535496	1.76908624172	1.76183438301	1.63399064541
171633	1.95353853703	1.96085453033	1.86612343788	1.97082412243	1.96656048298	1.87955451012
172029	1.53879380226	1.65245699883	1.61615526676	1.51066243649	1.66624999046	1.62685918808
172130	1.79414355755	1.78381073475	1.71563374996	1.79530501366	1.78373968601	1.72279584408
172332	2.00198721886	1.72780656815	1.77989768982	2.02822422981	1.79341340065	1.78615427017
172534	1.93324577808	1.87214767933	1.811886549	1.93351399899	1.88210582733	1.81444132328
172938	1.73779928684	1.75228989124	1.73576259613	1.71812725067	1.80235111713	1.73259580135
173334	1.69169783592	1.56333136559	1.63862884045	1.69608163834	1.57394504547	1.65616309643
173435	1.89167463779	1.86821877956	1.85379731655	1.91026437283	1.83708965778	1.86010766029
173536	1.75242340565	1.68779587746	1.76604056358	1.74802720547	1.70930182934	1.75743913651
173940	1.7647100687	1.79063820839	1.67241203785	1.75942122936	1.83072388172	1.6790522337
175035	1.52579939365	1.40007436275	1.39470553398	1.55217647552	1.3851275444	1.39069855213
175439	1.85821688175	1.73189938068	1.63353276253	1.86215496063	1.78240227699	1.63826537132
176542	1.78133094311	1.69636702538	1.60931074619	1.78037858009	1.71099460125	1.61524522305
177645	1.90355360508	1.88850641251	1.94324445724	1.91972887516	1.86108875275	1.95668745041
177746	1.94187045097	1.83153569698	1.77046310902	1.93159711361	1.86172640324	1.77921974659
178142	1.80696034431	1.86312437057	1.68118047714	1.8198877573	1.85946977139	1.69485259056
178849	1.62593138218	1.56432819366	1.4511910677	1.59325969219	1.59504842758	1.46257126331
179346	2.09747672081	1.77699792385	1.73256087303	2.08453941345	1.8843870163	1.73930048943
180129	1.53670358658	1.49146783352	1.46368014812	1.51602697372	1.50673234463	1.47191166878
180432	1.79073619843	1.81483495235	1.77931642532	1.76667904854	1.86201369762	1.78440928459
180836	1.89701104164	1.8165293932	1.71463251114	1.90126693249	1.84996831417	1.73683857918
180937	1.57444226742	1.50249826908	1.47226774693	1.53580653667	1.58290684223	1.46919333935
181131	1.73332607746	1.754997015	1.66568124294	1.74203109741	1.721544981	1.67764031887
181232	1.70666575432	1.5702303648	1.6016548872	1.7147731781	1.58604383469	1.61124670506
182739	1.86005198956	1.77685463428	1.75811374187	1.88288164139	1.75482845306	1.79055821896
182840	1.7986073494	1.53952777386	1.58386945724	1.79628145695	1.58552622795	1.58233618736
183034	1.5728417635	1.47029352188	1.47002291679	1.57428479195	1.50765645504	1.47814691067
185139	1.78599345684	1.74507951736	1.77248203754	1.78546404839	1.7719810009	1.76472234726
185442	1.65951442719	1.63538324833	1.50395548344	1.64161622524	1.67803502083	1.50222933292
186141	1.55115640163	1.44468688965	1.44273650646	1.53709578514	1.49853742123	1.43016111851
187547	1.85930776596	1.83506274223	1.83734607697	1.85544979572	1.87112736702	1.82714986801
187850	1.63894557953	1.59670746326	1.62823045254	1.62351584435	1.64387214184	1.61735785007
188347	2.0238301754	1.83171963692	1.86358892918	2.01532149315	1.89518129826	1.87541913986
189349	1.67905282974	1.65716934204	1.58494913578	1.68632614613	1.6570751667	1.58897721767
190031	1.92882335186	1.78828477859	1.66369700432	1.92854356766	1.8072630167	1.65601682663
191033	1.65827012062	1.66841804981	1.56765389442	1.62139809132	1.69628155231	1.58038663864
191336	1.6621183157	1.59656119347	1.53541898727	1.64904212952	1.6141115427	1.53573095798
191437	1.73955869675	1.64902293682	1.68024659157	1.74333071709	1.67901968956	1.67987024784
191841	1.72019171715	1.64775919914	1.57170033455	1.70265173912	1.6816842556	1.57271552086
192540	1.70225298405	1.74793708324	1.65032804012	1.66950249672	1.78307425976	1.65983188152
192843	1.70660007	1.58376228809	1.59944629669	1.68536913395	1.60842907429	1.61153352261
194140	2.00582742691	1.79352176189	1.70593893528	2.02334451675	1.84855747223	1.70935082436
194645	1.55188512802	1.38772523403	1.44323754311	1.55255270004	1.42494916916	1.43516731262
194847	1.81303191185	1.80099868774	1.67168867588	1.80713570118	1.81198906898	1.68900990486
195041	1.91943705082	1.83920025826	1.79484713078	1.91993737221	1.87095141411	1.79248452187
195647	1.95131218433	1.94252955914	1.78242075443	1.93551707268	1.95264852047	1.78543281555
195849	1.65355348587	1.54234230518	1.521946311	1.64660477638	1.54943358898	1.52740490437
196144	1.98869073391	2.00836658478	1.88612389565	1.96282815933	2.04689908028	1.89294242859
196750	1.70565521717	1.68510353565	1.56769728661	1.68403112888	1.7231708765	1.58205091953
197348	1.80930221081	1.89252412319	1.66639590263	1.80184113979	1.87235081196	1.69260454178
198350	1.70992672443	1.71294748783	1.67673146725	1.69050252438	1.71960043907	1.67577028275
198451	1.56386876106	1.43494021893	1.45242547989	1.55480158329	1.47366392612	1.44812881947
198855	1.66813564301	1.68105959892	1.58768129349	1.64205038548	1.71036052704	1.58276903629
199150	1.62304830551	1.71032321453	1.62418162823	1.60845327377	1.70328688622	1.63551497459
199453	1.7819494009	1.62860608101	1.5701431036	1.77656793594	1.67453348637	1.57308268547
199655	1.67048025131	1.60309648514	1.57170271873	1.67398107052	1.62663698196	1.55848157406
199958	1.61491644382	1.55714452267	1.62910366058	1.62304985523	1.53190374374	1.63451743126
200109	1.92036020756	1.82509744167	1.74515557289	1.92121112347	1.84569621086	1.75753545761
200614	1.81607103348	1.779722929	1.69051086903	1.78962528706	1.80509078503	1.68730533123
201111	1.57990324497	1.39580595493	1.33363974094	1.58281099796	1.44504022598	1.33376848698
201414	1.81066167355	1.62886309624	1.57669210434	1.80193436146	1.6752127409	1.59259927273
201818	1.77386546135	1.88594484329	1.7567293644	1.76207876205	1.91853451729	1.76419496536
203418	1.73406457901	1.59862887859	1.56911289692	1.70914530754	1.64374673367	1.5783315897
204016	1.94983267784	1.83728969097	1.73336684704	1.90791237354	1.92389154434	1.7435182333
204521	1.84906458855	1.77016425133	1.77633750439	1.86418569088	1.80675506592	1.77496409416
205119	1.66653001308	1.68987190723	1.57521533966	1.67880451679	1.69519257545	1.58491563797
205220	1.78042829037	1.65130221844	1.66419780254	1.78750550747	1.6822206974	1.6569750309
205725	1.85818612576	1.80545949936	1.76569747925	1.84410381317	1.83199298382	1.77361798286
205826	1.77734160423	1.65314340591	1.68473482132	1.76775026321	1.68511891365	1.68679368496
208226	1.77085471153	1.64261817932	1.57746505737	1.76337623596	1.64910113811	1.58685219288
208327	1.52934551239	1.51577198505	1.42277407646	1.52221035957	1.5144661665	1.43548738956
209935	1.63491415977	1.59785926342	1.59443485737	1.63086724281	1.58194351196	1.58873641491
210011	1.54778850079	1.58553028107	1.52277994156	1.52942633629	1.58126366138	1.52905917168
210415	1.85763418674	1.92003571987	1.76813542843	1.87319755554	1.90814507008	1.77953159809
210617	1.77335429192	1.68193054199	1.74887502193	1.80255699158	1.65841090679	1.74601709843
211215	1.62740528584	1.53038263321	1.48162341118	1.61991357803	1.57545733452	1.47190845013
211316	1.57692289352	1.46174061298	1.3940230608	1.57442903519	1.49220705032	1.39366877079
211417	1.83016932011	1.77141976357	1.69950246811	1.80854022503	1.80028522015	1.70913732052
211720	1.70884215832	1.62568688393	1.50500655174	1.69647181034	1.66046786308	1.50488519669
211922	1.87572228909	1.86892724037	1.78409159184	1.84220433235	1.87933897972	1.8037737608
212116	1.60188913345	1.58862829208	1.47633135319	1.61190629005	1.58256030083	1.47669506073
212217	1.94008111954	1.98654568195	1.92723309994	1.9336861372	1.99907696247	1.92548751831
212318	1.76580286026	1.71666443348	1.62751173973	1.76132214069	1.70610296726	1.65360057354
212419	1.89901065826	1.7769677639	1.75744795799	1.90267431736	1.81634676456	1.76364171505
214019	1.90835666656	1.86598849297	1.81649458408	1.93205904961	1.84976804256	1.81883776188
214221	1.7946023941	1.7286709547	1.60730266571	1.786434412	1.73655879498	1.6090066433
214423	1.58482766151	1.59723341465	1.51161277294	1.58193731308	1.59821152687	1.51568901539
214726	1.742795825	1.71113395691	1.58308231831	1.76117026806	1.70681631565	1.59535264969
217126	1.61579442024	1.46844959259	1.43353736401	1.63375687599	1.5170930624	1.43570923805
217429	1.97890901566	1.85911118984	1.75266742706	1.9465597868	1.89658689499	1.76219534874
221319	1.79359579086	1.83423280716	1.71354997158	1.75889062881	1.8554224968	1.72965943813
224022	1.72922337055	1.55484044552	1.57523858547	1.73140394688	1.58393776417	1.57789778709
231928	1.79675853252	1.68529379368	1.69931793213	1.7990000248	1.69619262218	1.70925104618
233326	1.76619160175	1.68048632145	1.63864588737	1.78342747688	1.71238219738	1.62889814377
239944	1.69556462765	1.75694286823	1.66044819355	1.66932427883	1.78282833099	1.66352438927
246133	1.81333839893	1.79595196247	1.71348071098	1.78781545162	1.82449102402	1.71605813503
250427	1.70358884335	1.61400866508	1.61963379383	1.70176506042	1.65540730953	1.61365020275
250932	1.94443249702	1.86786663532	1.82523357868	1.94404661655	1.89767682552	1.81195855141
251833	1.61162555218	1.68084681034	1.68462133408	1.60324454308	1.68083488941	1.69796359539
255639	1.61383700371	1.58726203442	1.58255851269	1.57622826099	1.61134910583	1.57074654102
256540	1.72361934185	1.68323683739	1.56678843498	1.72107386589	1.6994664669	1.57751119137
280739	1.8202984333	1.73770940304	1.72918558121	1.79331815243	1.76852488518	1.73802626133
284646	1.63884162903	1.57828736305	1.59112095833	1.63623392582	1.59564375877	1.58175957203
285345	1.81446743011	1.58715057373	1.45988690853	1.8292375803	1.63228797913	1.44232666492
285446	1.55069005489	1.60050499439	1.62054312229	1.55086433887	1.58669447899	1.62941145897
289555	1.69515311718	1.5630171299	1.59534716606	1.68970787525	1.5886631012	1.5956094265
290136	1.62255942822	1.7641428709	1.60342252254	1.58450174332	1.75696516037	1.62025713921
293748	1.72064077854	1.73052275181	1.69131457806	1.70780110359	1.75716412067	1.69752705097
298051	1.69838690758	1.73289215565	1.65379071236	1.6874127388	1.74593472481	1.64666998386
298455	1.55907928944	1.51213681698	1.51300394535	1.55243301392	1.54341590405	1.52410244942
303119	1.8606210947	1.78617787361	1.6861345768	1.85893857479	1.80153203011	1.70616805553
303624	1.81290400028	1.64883112907	1.73633050919	1.83082211018	1.6921749115	1.72260665894
304020	1.55739653111	1.5074493885	1.48627567291	1.54915559292	1.52619123459	1.48720037937
307127	1.73148822784	1.61180055141	1.48436379433	1.7256834507	1.66132891178	1.48242485523
308331	1.56694233418	1.48703157902	1.50780975819	1.55920732021	1.53634476662	1.50246691704
310621	1.7496445179	1.65713429451	1.7374380827	1.7633317709	1.64368104935	1.73934412003
316633	1.68815839291	1.72091627121	1.65745556355	1.66700387001	1.72684693336	1.67552554607
334635	1.57261192799	1.50884819031	1.47216665745	1.57641136646	1.51981079578	1.47224473953
339847	2.10287094116	1.86563324928	1.79935729504	2.08743095398	1.9309450388	1.79616582394
351938	1.73715221882	1.65333855152	1.65707075596	1.73663198948	1.65823042393	1.66311872005
352132	1.59374034405	1.63061404228	1.56463873386	1.56285464764	1.64547801018	1.5778491497
361941	1.77819442749	1.64805996418	1.640873909	1.81209206581	1.66288495064	1.64347529411
365343	1.74844694138	1.78967499733	1.68862807751	1.70649778843	1.81227374077	1.69793140888
366042	1.6644423008	1.57175588608	1.55795609951	1.64412581921	1.61079633236	1.56356787682
366446	1.61773824692	1.51167631149	1.41099536419	1.61096262932	1.54531347752	1.41858553886
371843	1.74515664577	1.61616933346	1.49215710163	1.73385083675	1.65552854538	1.49694049358
377451	1.9452341795	1.86751115322	1.87595665455	1.95036196709	1.92688703537	1.87697124481
380036	1.5827780962	1.57183384895	1.45885622501	1.57922780514	1.58428514004	1.46919131279
385450	1.5329709053	1.58592557907	1.53888297081	1.50505495071	1.59463644028	1.54109859467
386250	1.61770522594	1.569419384	1.57892012596	1.62135076523	1.58311522007	1.58945965767
390645	1.61341917515	1.57709157467	1.53981792927	1.59297466278	1.60874521732	1.53924798965
395958	1.67523050308	1.63888311386	1.60336875916	1.66377174854	1.69579446316	1.60308980942
397154	1.68345868587	1.67465209961	1.65914201736	1.66467869282	1.67606174946	1.6592592001
397760	1.65358495712	1.62629914284	1.62143540382	1.64651036263	1.62027752399	1.61846768856
397861	1.56836628914	1.59347438812	1.52792096138	1.57707321644	1.59482336044	1.52663230896
412528	1.9527888298	1.79259288311	1.71597242355	1.95944666862	1.81048464775	1.71610736847
414229	1.45926654339	1.4888471365	1.43006706238	1.47132265568	1.44876253605	1.43022227287
415837	1.81989920139	1.73271775246	1.61173141003	1.81775605679	1.75144815445	1.61715865135
422632	1.8048183918	1.91330909729	1.91816437244	1.77811670303	1.9372202158	1.92384421825
433839	1.8052110672	1.76438701153	1.60571813583	1.79924821854	1.78768146038	1.60604536533
436239	1.81427383423	1.85790574551	1.80095732212	1.8002383709	1.8634275198	1.80342853069
436845	2.1080057621	1.93292379379	2.00810885429	2.08288025856	2.02645015717	1.98949861526
441939	1.79106533527	1.72089922428	1.64221072197	1.80138456821	1.74782073498	1.64392149448
445543	1.47711503506	1.45696210861	1.50065910816	1.47342681885	1.45870494843	1.4934233427
448347	1.50167179108	1.50607132912	1.46216607094	1.50397360325	1.50182723999	1.45729148388
465852	1.63500833511	1.67224025726	1.69744110107	1.60860586166	1.68027496338	1.68840026855
473952	1.7011026144	1.72003173828	1.66473829746	1.72087085247	1.72962355614	1.66216218472
479762	1.70684087276	1.68820154667	1.60993313789	1.70963144302	1.71412777901	1.61211526394
480141	1.73959076405	1.67925226688	1.67548263073	1.75874233246	1.68504858017	1.66386914253
485757	1.62922716141	1.51081383228	1.47761452198	1.61116099358	1.57049226761	1.4812732935
486759	1.48909235001	1.46722531319	1.4637670517	1.4816981554	1.51194572449	1.46205914021
497865	1.4923479557	1.43080723286	1.32750380039	1.48364663124	1.45444607735	1.32345092297
499566	1.8096293211	1.72400188446	1.63747143745	1.80275380611	1.73622739315	1.6454885006
500222	1.62414550781	1.67497825623	1.56394040585	1.61670923233	1.67761492729	1.56509768963
510326	1.92721295357	1.87143480778	1.79356181622	1.94228792191	1.86467576027	1.81530344486
519950	1.75715875626	1.83264040947	1.61725986004	1.74726831913	1.84448540211	1.63111925125
522434	1.83978462219	1.6694136858	1.71792840958	1.83200800419	1.70629251003	1.71574652195
530635	1.54438698292	1.5329939127	1.56921732426	1.52834260464	1.53275799751	1.56586551666
531536	1.71814608574	1.69368565083	1.64597177505	1.70035219193	1.72305607796	1.64959657192
540436	1.73479390144	1.6631026268	1.57374107838	1.73785507679	1.68414187431	1.59578156471
541943	1.79974496365	1.6967498064	1.60397326946	1.79523015022	1.73935461044	1.597245574
545345	1.60101175308	1.52788686752	1.50092637539	1.61379241943	1.51824772358	1.50046682358
547046	1.94794797897	1.89594221115	1.86408746243	1.9663746357	1.92046451569	1.85881078243
561242	1.75397384167	1.60719203949	1.57793462276	1.75278961658	1.65671312809	1.58046662807
562446	1.6969960928	1.55904376507	1.61044788361	1.69752776623	1.58588135242	1.61003446579
565452	1.90223193169	1.76629471779	1.79419469833	1.90886306763	1.82028460503	1.80767786503
566454	1.7667504549	1.62978172302	1.72622430325	1.7673920393	1.65874528885	1.71387398243
567052	1.74935042858	1.74953520298	1.61062598228	1.73797595501	1.77625608444	1.61496424675
567961	1.8960095644	1.89543497562	1.79175627232	1.9023475647	1.88759160042	1.79736793041
568963	1.74583649635	1.77346742153	1.6795514822	1.73547303677	1.79328680038	1.66963636875
570243	1.87258338928	1.8749037981	1.83691823483	1.88029050827	1.88024389744	1.81915462017
571548	1.58169329166	1.41053664684	1.2920486927	1.58864343166	1.4749506712	1.3005657196
573451	1.74722218513	1.57546448708	1.57798600197	1.74903190136	1.59632146358	1.57715630531
580044	1.83694028854	1.77998280525	1.69532895088	1.81120693684	1.86188614368	1.69385707378
580347	1.83942687511	1.74948906898	1.75094723701	1.82931959629	1.77578294277	1.74583721161
581349	1.6949763298	1.71093118191	1.74150443077	1.69889843464	1.69180583954	1.74355578423
583858	1.61833226681	1.56787192822	1.54547488689	1.5957890749	1.63817250729	1.54412472248
586460	1.81575167179	1.8314602375	1.64775764942	1.80093955994	1.85453116894	1.65619039536
594156	1.70182216167	1.65777122974	1.58598291874	1.69711697102	1.67818427086	1.59110164642
598568	1.86301338673	1.66388261318	1.64953827858	1.88325786591	1.66462934017	1.63907849789
599469	1.95573961735	1.87534105778	1.86243796349	1.97233390808	1.8941501379	1.85928654671
599671	1.55488884449	1.55842828751	1.47695970535	1.54973769188	1.58909523487	1.49641907215
622236	1.6505163908	1.56996369362	1.52303171158	1.66162800789	1.57324516773	1.52655017376
623844	1.54100894928	1.4862383604	1.41960382462	1.52136468887	1.52124345303	1.42039120197
627549	1.76816010475	1.63867521286	1.63223588467	1.7525639534	1.71183884144	1.62558829784
638049	1.74895167351	1.67726802826	1.58939504623	1.72692573071	1.70328974724	1.59629583359
645551	1.58948242664	1.4789352417	1.40226995945	1.58175396919	1.52061653137	1.40726971626
665254	1.99864768982	1.88226568699	1.70282351971	1.99086856842	1.89838862419	1.70783865452
672756	1.77202606201	1.6753013134	1.63476383686	1.76697874069	1.68929338455	1.620683074
673455	2.02482771873	2.0202395916	1.8780195713	1.96492421627	2.07026910782	1.87601661682
677968	1.96587383747	1.77492463589	1.79323041439	1.98472964764	1.80615186691	1.79049241543
679568	1.54885745049	1.51138949394	1.47871780396	1.54072010517	1.53163075447	1.49222898483
680957	1.76893174648	1.60324525833	1.55949616432	1.74938178062	1.67320787907	1.56765329838
683256	1.83723223209	1.75007927418	1.74942457676	1.83032655716	1.73988461494	1.75239372253
685058	1.53967392445	1.52983367443	1.45263552666	1.52529633045	1.57184636593	1.45771968365
687163	1.56840443611	1.51594305038	1.50952017307	1.55736720562	1.55470740795	1.51616215706
690152	1.66323721409	1.64549934864	1.58366549015	1.6360809803	1.67435824871	1.60006392002
695768	1.69127368927	1.64284873009	1.58099162579	1.68770086765	1.64244747162	1.58208370209
702133	1.61116623878	1.63214027882	1.51050496101	1.58744645119	1.64808690548	1.52481341362
704238	1.52260684967	1.49639356136	1.61918544769	1.48314726353	1.55643570423	1.61556196213
705341	1.47464430332	1.38958418369	1.38719391823	1.48566126823	1.41692256927	1.39172184467
709551	1.65361988544	1.59119224548	1.54919219017	1.65200078487	1.62346935272	1.55180203915
713239	1.94133710861	1.7818223238	1.72855043411	1.92371022701	1.75843536854	1.69310247898
715647	1.7500474453	1.66101050377	1.60598540306	1.75601363182	1.69423854351	1.61588776112
729254	1.69436585903	1.64003944397	1.58640253544	1.68051600456	1.68251788616	1.58205032349
729557	1.92037558556	1.87329483032	1.86794602871	1.86692130566	1.94524765015	1.86542499065
732243	1.90765750408	1.92222082615	1.99681663513	1.86832952499	1.92914617062	2.01893734932
742549	1.56999433041	1.58858311176	1.56557559967	1.53939068317	1.62375044823	1.56235229969
748258	1.72216165066	1.64583814144	1.67131865025	1.69307863712	1.67875945568	1.67912757397
748662	1.74434876442	1.69809782505	1.58782863617	1.71052193642	1.73466336727	1.58843970299
751348	1.69034659863	1.5852959156	1.56452345848	1.69544172287	1.63610839844	1.55604922771
756055	1.59455561638	1.50269043446	1.49956536293	1.58882045746	1.53555047512	1.50040125847
759869	1.51874017715	1.4721006155	1.40423130989	1.52250468731	1.49794745445	1.39875364304
761957	2.0420255661	1.94383001328	1.93677783012	2.04610013962	1.97223448753	1.94786286354
765056	1.69057512283	1.68949949741	1.60853004456	1.67606019974	1.69373703003	1.62016785145
770352	1.51467037201	1.55459475517	1.56322014332	1.49010813236	1.54698371887	1.57023203373
771354	1.6708971262	1.66233873367	1.61592686176	1.6444324255	1.69335448742	1.61637341976
779370	1.75545275211	1.64170563221	1.54134845734	1.73444461823	1.69493293762	1.55264949799
782561	1.54325640202	1.50521016121	1.49959456921	1.52582979202	1.5109038353	1.49852526188
784565	1.81742346287	1.76690471172	1.66191720963	1.81409430504	1.78833413124	1.65042448044
786569	1.59493017197	1.57834839821	1.68085312843	1.58634757996	1.63566768169	1.68323624134
788876	1.70814871788	1.68081986904	1.66644334793	1.71352028847	1.68554544449	1.66744041443
789373	1.79896056652	1.84702241421	1.71947169304	1.77599668503	1.86918866634	1.72952544689
792564	1.86309349537	1.87843382359	1.85302186012	1.86475360394	1.88163149357	1.85954678059
802844	1.86056280136	1.62721645832	1.59315752983	1.85545492172	1.71945512295	1.5928478241
816653	1.90295994282	1.78184020519	1.63817989826	1.88793778419	1.81432342529	1.64480650425
826353	2.05353856087	2.0164141655	1.90967869759	2.0563416481	2.05157852173	1.90996158123
826454	1.73168075085	1.84887695312	1.59837162495	1.72341692448	1.86779773235	1.61432898045
833148	1.58584618568	1.50982987881	1.49684476852	1.59746038914	1.52811837196	1.49534380436
833249	1.67506623268	1.55426633358	1.52824437618	1.67614400387	1.57073616982	1.5302811861
837560	1.5194517374	1.56378591061	1.46975827217	1.49678695202	1.5925270319	1.47095584869
837964	1.80890798569	1.87103617191	1.74083840847	1.79289865494	1.85772526264	1.74503278732
845458	1.6667368412	1.67280972004	1.56128156185	1.65106737614	1.68555557728	1.5667527914
849971	1.67002213001	1.66366672516	1.76029801369	1.63702356815	1.69306528568	1.75857555866
856766	1.79081225395	1.77309560776	1.71754646301	1.77787923813	1.80764174461	1.72247588634
857263	1.72457563877	1.67240536213	1.68040943146	1.7228281498	1.67846989632	1.68255233765
859671	1.78232336044	1.67402124405	1.6466935873	1.77679240704	1.71788370609	1.63280892372
861456	1.85653698444	1.85917723179	1.74747884274	1.84582221508	1.8860707283	1.75632810593
865363	1.76118099689	1.67167532444	1.68721532822	1.75214874744	1.73394954205	1.68135976791
871762	1.66182935238	1.61556613445	1.62975513935	1.66284132004	1.61200225353	1.62420904636
871964	1.77813088894	1.67241942883	1.51498711109	1.77510225773	1.69752693176	1.51119124889
872158	1.74240875244	1.66742193699	1.5833158493	1.71365654469	1.70030891895	1.60146915913
877168	2.04791855812	1.86428582668	1.79000937939	2.06220221519	1.85531234741	1.79772722721
877269	1.96618545055	1.74708640575	1.732665658	1.96165788174	1.80783164501	1.73204624653
885975	1.81972789764	1.66821658611	1.71390247345	1.84153604507	1.67326807976	1.70554339886
887373	1.94890677929	1.72323465347	1.66924035549	1.95763540268	1.79570710659	1.66977417469
889579	1.69829249382	1.63354194164	1.61771726608	1.69230663776	1.65454339981	1.62712085247
894673	1.84987092018	1.74998855591	1.75878310204	1.8385874033	1.80399572849	1.75628900528
896778	1.66558742523	1.58531856537	1.50030660629	1.63321340084	1.65787756443	1.49405634403
896879	1.73560595512	1.78076910973	1.65634739399	1.73355162144	1.75766098499	1.66257464886
898176	1.52297103405	1.55256152153	1.53386569023	1.50307738781	1.54204857349	1.54245138168
899885	1.82620084286	1.77506017685	1.6902641058	1.83771216869	1.77912950516	1.69850993156
901139	1.96523833275	1.85581099987	1.79006314278	1.93160796165	1.92214548588	1.81267559528
901442	1.63364183903	1.69531607628	1.50665402412	1.63438284397	1.66765415668	1.50770509243
904044	1.98694813251	1.96514797211	1.95560956001	1.97845613956	2.01941537857	1.95088708401
907656	1.68285405636	1.7479839325	1.65541052818	1.66895747185	1.74883782864	1.6630756855
910241	1.51515293121	1.51703643799	1.45118618011	1.47544491291	1.55687725544	1.45943069458
912447	1.62613713741	1.59454751015	1.59725105762	1.58057665825	1.66674458981	1.58755683899
917255	1.84354293346	1.74126708508	1.67202675343	1.83224785328	1.80133724213	1.6739205122
922854	1.65602350235	1.67785167694	1.64680707455	1.65207064152	1.687251091	1.64729881287
930449	1.77711689472	1.80432021618	1.63588476181	1.76855158806	1.7863278389	1.6364376545
932554	1.73811507225	1.7300632	1.60557198524	1.74400866032	1.72909152508	1.61553800106
937160	1.6610827446	1.57033002377	1.57672441006	1.67067265511	1.60144650936	1.57516741753
957974	1.76275730133	1.75063788891	1.7322934866	1.74571311474	1.80642771721	1.73222053051
958976	1.7429163456	1.54277157784	1.59543013573	1.73429834843	1.56704819202	1.60271573067
959574	1.75549054146	1.6140588522	1.666629076	1.74237394333	1.64481127262	1.66768431664
965367	1.55798971653	1.41362190247	1.42916738987	1.55662488937	1.45627892017	1.42137694359
965771	1.58015429974	1.57181763649	1.57061624527	1.56243479252	1.57125401497	1.57335925102
978578	1.76506626606	1.79786586761	1.60239923	1.72887313366	1.86355245113	1.61166667938
983773	1.66334724426	1.81345832348	1.71543955803	1.66965639591	1.78206646442	1.71969020367
984472	1.79400217533	1.84989130497	1.81140744686	1.80146825314	1.81119143963	1.81585848331
987983	1.67639124393	1.66427147388	1.54426527023	1.65577745438	1.70136272907	1.54219341278
991267	1.67521476746	1.7905356884	1.61592638493	1.67803108692	1.7634652853	1.62220466137
992774	1.81175136566	1.59094655514	1.69901561737	1.83414006233	1.6142424345	1.68246996403
994273	1.86661326885	1.86573266983	1.69462001324	1.86053609848	1.87477195263	1.69646406174
