# Supplementary material for: Microstructural organization of human insula is linked to its macrofunctional circuitry and predicts cognitive control
Source: eLife. 2020 Jun 4;9:e53470. doi: 10.7554/eLife.53470 (PMC7308087; doi:10.7554/eLife.53470)
Supplement: Figure 8—source data 1. [file elife-53470-fig8-data1.csv]

X_CANAxis1	Y_CanAxis1
1.399001764	-0.536961038
0.718346768	0.267520695
0.77973946	2.12651168
0.694553498	-0.478291867
-0.600736736	-1.555781993
-0.337490266	-0.155659336
-0.76767985	0.559706518
-0.260873086	1.449578324
-0.107586622	0.030121123
1.272902197	-1.607389863
-0.11924277	-1.022209592
-0.299325826	-2.174025753
0.831058055	1.108011748
-0.079583208	-1.067637213
-1.591063361	0.587067801
0.748372574	-1.136030652
1.85411841	0.530786822
-0.039164583	0.852419179
-1.556508267	-0.449286474
0.220818733	0.246710844
-1.342632099	-0.283239443
0.303114076	0.793837415
-1.00219844	-1.321488557
1.200408166	0.74597981
-0.342216332	-0.228205986
1.315981443	-0.346542708
-0.855588555	-0.768074417
-0.182870903	1.662051679
-1.209492253	-0.59695857
-0.644290465	-0.107667486
1.405112485	0.25160451
1.830129464	0.217660483
0.242558442	0.462259006
1.981938057	0.712128789
-0.372091524	-0.593052356
-1.813402633	-1.792922585
-1.95758265	-1.453254814
-0.139043162	-0.915349822
-0.925210181	1.456987779
0.758150054	1.074995555
0.392692224	-0.709241448
-1.157059621	-0.785502905
1.852846808	0.859548924
-1.413083339	-0.054160466
0.937389328	1.287440257
-0.025716609	-0.145341476
-0.146773365	-0.432476286
-0.078265661	0.190364865
-1.386428759	-0.349790426
0.100859127	-2.129092711
-0.614002798	0.11523844
-0.956504294	-2.030674433
-0.007027794	-0.121091766
-0.622805855	0.263075157
-1.089812041	-0.361610704
0.637355884	-0.868875977
0.660861563	0.305415462
0.58153266	-0.569519847
0.981074531	0.291398904
1.294967657	1.052896288
-0.218654961	-0.649310754
0.566317718	0.654876615
0.323174615	-0.73521319
-0.010342156	-0.487380556
-0.269162851	0.075328124
0.20043332	1.346797183
-0.106160412	0.433585555
-0.207972753	-2.446060439
-0.442564076	-0.432945578
-0.16928579	-1.148239565
0.858809856	1.602543443
-1.16352805	-0.827576991
-0.186438958	0.724142606
-0.284415424	0.113461674
1.181318884	1.935152915
1.879230284	-1.45216883
-0.529573728	-0.683637362
0.789569119	2.16447025
0.321708294	0.876369003
-0.059570864	-0.078431485
-0.364696206	0.035186608
0.919334438	1.069116648
-0.703180425	0.332218904
-0.576193567	0.375669599
0.055543301	0.74862767
-0.295389599	-1.211625458
0.446392319	0.012368347
0.210129677	0.195936247
0.859168059	-0.426564747
1.547137476	-0.556771958
0.601999667	0.132431537
-1.052289814	0.097528678
0.987383628	0.485488436
0.155263772	0.904940766
-1.385250745	0.021531439
-0.862129719	0.337063497
-0.832954232	1.141851974
1.002775856	-0.294788959
-0.395062654	0.070995129
0.926807025	0.779600359
-0.938726987	0.117572708
-0.325884607	-0.556644263
0.787698201	1.956395036
1.803160705	0.264262738
-2.581059351	-1.287953462
-1.57068107	0.15548786
-0.916702834	-0.449440164
0.469016348	0.63810785
-1.109690508	0.025977344
1.447203897	0.470666949
-1.379034507	0.791951852
0.271987825	0.300564592
-0.262840805	-0.072109097
0.200937525	0.143189716
-0.603947907	-0.002727749
1.55765598	1.438766741
-0.030742077	0.173658425
0.164295086	-1.524552604
-1.565048415	-1.713695488
1.520861037	0.666991545
-0.775489271	-0.357805468
0.799158054	-0.937808896
0.472770653	0.881383856
0.237529736	1.951713233
-0.152535017	-0.516125426
0.676745035	-0.053184127
1.6863612	-0.266610717
0.165723443	0.779194929
0.684573054	-0.497378781
-0.661840173	1.055085617
0.771737556	-0.127352874
-2.075628836	-2.505100623
-2.116711229	0.383080987
-2.561532815	-1.481593665
0.220434523	0.566792363
-0.138968433	0.582132188
0.898312836	0.463838038
-1.091253818	-0.312881137
0.390320508	0.154049372
-3.408310967	-1.495086691
0.158337901	0.562549313
0.296139082	0.903479808
-2.081829651	-0.38882194
0.376746641	-2.093312508
-1.640911273	-1.608353954
1.589626562	0.410234563
0.192467556	-0.803714332
0.31950733	0.299225393
-0.585297411	-1.190219994
-1.257923121	0.365392464
0.86289821	-0.57576357
1.652925317	-0.106209244
-0.160906653	0.804207109
0.575970415	1.437342049
-2.229618245	-1.882776387
1.643880266	0.549722411
0.224281486	-1.506280491
-0.630046057	0.73186723
-0.808158343	0.322784698
1.206463911	1.630941021
1.228283506	1.225663166
-0.150603818	1.520765817
1.14559286	0.691337935
0.507292298	1.426856131
-1.636704254	-0.351574677
1.874465578	0.90599816
-0.368773125	0.050411427
-0.273335394	0.093543231
-0.875954592	-1.469961048
0.06051573	-1.258999485
0.541252453	1.274846703
-2.098356516	0.041702266
-0.084303758	0.980413589
-0.042589147	-0.461445991
1.717311803	0.873989858
-0.211865002	1.652367224
1.496428795	0.073909617
-1.084105089	-1.567471982
0.349442944	-0.175409181
-1.522564301	-1.143314261
0.45565984	-0.201620943
-1.446957814	0.581826971
-0.178653108	0.631787087
0.960429566	-1.337090226
-0.104997013	0.164752023
-0.084314187	1.542257045
-0.980970776	-1.203251644
-0.513148209	-0.259458851
-0.436990086	-0.21579888
-0.132354049	-0.756111161
-0.208395384	0.029678549
-0.361315269	-0.065684948
0.321135898	-0.661782442
0.377659983	-0.745560297
0.859665484	-0.047221936
-1.590505795	-0.62554805
-0.227511872	-1.184097042
0.808563489	-0.88582178
-0.183060857	-0.573747027
0.668975487	2.643644039
0.106485858	-0.318887994
-1.277000245	0.686728617
-0.047317059	0.864439736
-1.476820361	-1.518859257
1.407989793	1.61699945
1.861089172	1.012480454
-0.684896604	-0.18996056
0.079681483	0.053792675
0.046047701	0.53956525
1.093881179	0.471962501
2.056000119	-0.190755394
-0.254145156	0.614449744
-0.189069633	0.197074078
0.156562344	-0.462183121
0.850791125	1.546427044
-0.643063816	0.179342547
0.187954637	1.412101175
0.681104539	-0.150538758
-0.874453556	0.137553544
0.967481511	-0.60057988
0.233157107	-0.403082737
0.964228651	0.223833057
0.352093309	-0.719946683
-0.342866513	0.644152146
1.204531458	1.859261837
-0.463042672	0.244775768
0.54053272	0.709205961
1.030817184	-0.082003292
-0.998192989	-1.578638346
-0.943689526	-0.765786166
-1.133631243	0.281172763
-0.902177392	-2.102526216
-0.389961255	-0.45366201
1.182342402	-1.135864793
0.757906389	1.349906872
0.679143407	0.419970259
1.508402337	-0.056336205
-0.721763732	0.856702043
-0.674035823	0.339344267
0.170067409	-0.622020219
-1.280776308	0.385439501
0.605391245	-0.183617414
1.845515929	0.571945849
2.091554708	-0.021552308
0.164987903	-1.553902659
0.6485623	2.153505436
0.772770174	0.21427649
1.309316624	-0.677283699
-2.143439367	0.065116026
-1.133241279	-0.307296773
0.636181493	0.578951743
-0.685722036	-1.26490968
-1.683764702	-1.21587581
0.302093369	-0.482318736
0.070176551	-0.502598844
0.846279774	-0.76203282
-0.413831825	-0.452224922
-0.136952174	0.56740333
-0.579561851	-0.867580075
-1.446448447	-2.045126434
0.436954984	-1.500738467
0.320037672	-1.604143916
1.841321861	1.743401591
0.749356902	2.104408377
0.219542738	1.568078664
-1.499460869	-0.842985226
0.530708502	0.836027022
0.650004409	0.60190112
0.076433055	0.213862886
1.136500561	-0.418007183
-0.865102482	-0.696807288
0.026873524	1.646123975
0.129864642	0.63893912
-0.628814818	-1.842169878
0.572403312	-0.98472167
-0.546244498	-0.569867451
1.159013479	0.786478335
0.284161456	-0.256167763
1.379296237	-0.154815988
0.05638499	0.939237247
-0.094652943	1.769363503
0.738177444	-0.151794953
0.446293083	-0.103617443
0.820992678	-0.339213613
1.473843971	2.507938731
0.13090909	1.16994883
-1.005234494	-0.999324696
-2.837499592	-0.997803976
-0.5795508	-0.424621676
-1.688106744	-0.558895783
0.676423901	0.100034352
-0.25414405	1.050572572
0.116674157	2.032214102
-2.114076639	0.828548811
0.677636337	0.402473193
-1.724737122	-0.603324123
-0.064705113	-2.290301033
0.136553348	-0.273285601
-0.129008195	-0.624901095
0.346313063	-1.333972975
-1.566427176	-0.995850972
0.060303391	0.0814538
0.132037656	0.338901119
-2.679392515	-0.921583733
-1.546043332	-1.456438535
-1.622455357	0.115094461
1.240832866	0.949735899
-0.913172135	-0.350498762
0.268230439	-0.473484917
-1.222169563	-0.989191019
-0.113917073	1.724447156
-1.597050386	-0.541378809
-1.61621208	0.39957394
0.526603157	1.493523824
0.6479192	-0.011301509
1.008736599	-0.153773864
0.39889712	-1.078626136
0.027871456	-1.215599877
-0.097804012	-1.948269333
0.213745454	0.240307874
0.342922506	1.69937494
-1.331879698	-1.758175031
-0.639746484	-0.585064474
1.058841456	-0.570384814
1.479792076	1.449894598
-0.719963245	-0.350400398
-0.529945475	-0.203580571
0.126815497	-2.116803468
-0.850921522	1.278448894
-0.043444704	0.618823098
0.770569092	-2.08386276
-0.010786144	-0.285012464
1.182110736	-0.880487725
1.250621318	0.484607605
-0.250315836	-0.06121947
0.090737361	-1.084275175
-0.860987654	1.759725402
0.330141896	2.809044903
0.431000641	-1.179490095
0.315002122	1.674811471
-0.163996277	1.252717009
0.74137922	-0.653960534
0.023205871	-0.2141142
-0.252542683	-0.638128183
1.663362346	0.608748381
-0.683246403	-0.432164535
1.196679141	0.798364109
0.465768137	-0.088636845
1.75246343	-1.637087765
0.456378306	-1.843383911
-0.460736372	-0.39652659
-1.892823865	-1.321414127
-1.40868715	0.284747313
-0.050091537	1.370665044
-0.153119613	-0.016461086
-0.72933712	0.179692826
1.687091564	0.833705625
-0.379328943	0.203704236
-2.272630068	-2.491410813
-1.658405062	-0.006727448
-0.074015669	1.104548972
0.805778784	1.499666925
0.276559821	0.910732478
1.229625061	1.083924178
-0.235018082	-1.053654726
-0.451369718	-0.815451341
0.507045158	0.190255467
-1.237397385	0.08954699
1.067400117	1.488044571
-0.097532041	0.739186057
-0.422635551	0.072821756
1.877237826	-0.69938173
1.942962762	1.104907314
0.322280962	1.129934619
-1.100735642	0.448739546
-0.939784196	0.023283812
-1.046037441	-0.819739496
-0.207094648	-0.265887577
-0.4593028	0.779913757
-0.726316981	0.543511966
-0.172502889	-0.339610851
-0.122915085	-0.821061949
1.228942493	1.284670126
0.874585099	0.159279147
-1.647672722	-0.882768106
0.734906753	-0.157344449
0.235480279	-0.900131183
0.36001361	0.460462233
0.696688179	-0.694839084
1.844413462	0.836586029
-0.653694742	0.218920902
1.586690892	-0.264670829
-0.742213771	-0.510537833
0.727839521	-0.069245606
0.04726587	2.106725024
-0.692979797	-0.295360732
0.391005547	0.010373413
0.172582875	-1.005275314
1.836131608	-0.590116596
0.847142048	0.250136052
-0.008025272	-1.049391574
1.120630983	0.824579629
-0.456571465	-1.606803299
0.310054595	0.780841584
0.0188569	1.107009421
-2.09976838	0.548371242
0.057425494	2.480594733
