# Supplementary material for: Microstructural organization of human insula is linked to its macrofunctional circuitry and predicts cognitive control
Source: eLife. 2020 Jun 4;9:e53470. doi: 10.7554/eLife.53470 (PMC7308087; doi:10.7554/eLife.53470)
Supplement: Figure 8—source data 2. [file elife-53470-fig8-data2.csv]

X_pred	Y_pred
0.307062394	-0.070971384
0.327146015	-0.142722648
0.293999947	-0.029311964
0.371870586	0.022003199
0.35920904	-0.044131045
0.39258135	-0.086317212
0.343140387	-0.131410578
0.346187049	-0.055028964
0.247273051	0.047326072
0.354305945	-0.004084783
0.372513961	0.07570575
0.298334254	-0.0967584
0.351259374	0.000837547
0.45922141	-0.106505872
0.327522095	0.029013412
0.260968607	-0.100282361
0.342230061	-0.096882978
0.41725084	-0.064632163
0.332515997	-0.064536577
0.403448129	-0.056169575
0.331370244	-0.097785631
0.37642586	0.012975035
0.28341516	-0.075242255
0.35969521	-0.046867104
0.213482872	-0.053022627
0.372744249	-0.022008694
0.358757374	-0.126947987
0.397527729	-0.04635175
0.37483208	-0.044038323
0.271777337	-0.054474663
0.253946706	-0.057785314
0.330438333	-0.075625978
0.253739021	-0.085771082
0.359652397	-0.023415244
0.39881041	0.025955087
0.435330003	0.021460172
0.349114178	-0.002779392
0.400500307	-0.133106066
0.306387055	-0.1089907
0.315722251	-0.017572938
0.394964236	-0.037339315
0.266951789	-0.058877699
0.414514418	-0.036372957
0.302668068	-0.116197782
0.339924025	-0.048138347
0.352140795	-0.036323654
0.348230982	-0.064718578
0.416954523	-0.033939707
0.350115113	0.066314044
0.376030367	-0.055531434
0.357436043	0.036613352
0.340458042	-0.047998057
0.376726302	-0.064669164
0.397420529	-0.031749603
0.309949034	0.006010253
0.30467879	-0.077400837
0.316935996	-0.027879935
0.297445979	-0.055486578
0.289038024	-0.088902464
0.34950143	-0.023402215
0.312677256	-0.08905572
0.316584081	-0.029323122
0.341053034	-0.028150344
0.355804256	-0.055351082
0.321510202	-0.126661326
0.346058349	-0.077384279
0.346640094	0.065547003
0.362668066	-0.031357215
0.340823555	0.004859854
0.298333216	-0.133811469
0.402397404	-0.021413696
0.359116699	-0.085054522
0.357496652	-0.061019574
0.320720605	-0.15254954
0.277705644	0.024782282
0.371414348	-0.011498811
0.299970126	-0.169934716
0.31870497	-0.099265708
0.34678539	-0.050136779
0.360829582	-0.059200857
0.29770858	-0.112137906
0.37325096	-0.089443494
0.36754749	-0.080602799
0.332560004	-0.097343233
0.355137128	0.007467192
0.320415545	-0.056075565
0.332633933	-0.064388058
0.308320497	-0.014146674
0.268716453	-0.03262892
0.31010272	-0.053169739
0.400074868	-0.063702498
0.292949139	-0.075154334
0.325238353	-0.099172615
0.413371752	-0.055627528
0.386363017	-0.091135813
0.401898176	-0.118628835
0.290824849	-0.026499131
0.359998337	-0.057931208
0.289906547	-0.094192748
0.389123579	-0.061407711
0.359494406	-0.026214604
0.303965418	-0.154732769
0.242461441	-0.091604522
0.48110876	0.001658618
0.420566306	-0.078240373
0.391966949	-0.031151257
0.31833115	-0.092788443
0.402970679	-0.070913111
0.261945461	-0.0829923
0.417331107	-0.117517983
0.32703806	-0.072532141
0.355436404	-0.047458133
0.332459782	-0.061654348
0.369429014	-0.054243928
0.263117145	-0.105640686
0.342593274	-0.061366561
0.317409936	0.021798971
0.407125181	0.038565532
0.265827127	-0.08866619
0.380650917	-0.033673771
0.304832198	-0.002716615
0.317420322	-0.101985025
0.32098371	-0.16739781
0.351513301	-0.028308206
0.310184214	-0.037257601
0.253561039	-0.022998476
0.331622881	-0.091286843
0.304904733	-0.032327244
0.37399508	-0.109687
0.303859446	-0.053200028
0.44357361	0.08768353
0.439821574	-0.084497081
0.473079906	0.034034696
0.329466578	-0.080379082
0.352786655	-0.085631233
0.308188237	-0.066111744
0.398295956	-0.036428343
0.324472645	-0.064102432
0.508831641	0.01180532
0.338289121	-0.080756384
0.327699433	-0.099344642
0.452804828	-0.030084457
0.315644365	0.069366332
0.431650041	0.02657239
0.261827909	-0.09432502
0.33004765	-0.016848989
0.327527174	-0.071106769
0.363697864	0.007516985
0.413893383	-0.07767464
0.286729831	-0.013391011
0.254073812	-0.026347395
0.360131298	-0.099309892
0.319658503	-0.122735407
0.455146953	-0.004020158
0.265054521	-0.102564826
0.317262761	0.011465162
0.376089928	-0.091060772
0.40976477	-0.058309853
0.287273356	-0.128483593
0.282051942	-0.102968445
0.357931939	-0.135638939
0.283684226	-0.08080275
0.313764053	-0.12784456
0.434184034	-0.037195489
0.254481252	-0.093217775
0.365631509	-0.054689711
0.356722902	-0.058224579
0.384358232	0.014554643
0.334051394	0.007361357
0.320651655	-0.118418039
0.438605856	-0.051208412
0.349235198	-0.101129335
0.343292404	-0.028421738
0.255848177	-0.090899171
0.385207566	-0.11414553
0.263947208	-0.029239708
0.391126162	0.020635457
0.318159017	-0.050024871
0.409395409	0.006378942
0.321121418	-0.037821106
0.426647395	-0.093426521
0.35108845	-0.092640507
0.29004781	0.016061848
0.346887517	-0.065748765
0.326548431	-0.148314751
0.397885492	0.018547691
0.366135168	-0.037259148
0.360146197	-0.055838123
0.349223538	-0.016408842
0.351746452	-0.056618522
0.361140186	-0.059913802
0.31776429	-0.025906804
0.335943672	-0.017817993
0.297679123	-0.055163086
0.425769854	-0.009388416
0.361460094	0.00828995
0.290267569	-0.004790504
0.348857584	-0.023908655
0.308379794	-0.195883701
0.336640235	-0.038126866
0.398680391	-0.125929614
0.344499346	-0.099510952
0.405666223	0.002235094
0.265576774	-0.131797212
0.256143214	-0.057599788
0.378324737	-0.047923347
0.33834565	-0.058041152
0.343027178	-0.081365751
0.282891434	-0.059593419
0.260555352	-0.015983301
0.358165816	-0.086739703
0.354096286	-0.05718462
0.332576142	-0.026669631
0.30110473	-0.127714824
0.3853624	-0.054053418
0.33674031	-0.12354415
0.303472748	-0.028028684
0.396063176	-0.075629091
0.304148937	-0.026339963
0.334279657	-0.02895754
0.289507341	-0.059454646
0.333314822	-0.024504712
0.362131493	-0.093211288
0.291145282	-0.130286703
0.366905826	-0.068761471
0.316278956	-0.089581034
0.279632294	-0.030055258
0.398192251	0.031391301
0.393683967	-0.00486082
0.40803509	-0.074755936
0.367774314	0.045572035
0.36304567	-0.031511157
0.268234758	0.002138204
0.313317907	-0.11599554
0.312989924	-0.077004708
0.252501992	-0.062282465
0.376008791	-0.12196803
0.374045152	-0.071336222
0.335901002	-0.020475164
0.406168209	-0.075343436
0.307519683	-0.048712784
0.261578493	-0.090921044
0.215526644	-0.063969094
0.309052406	0.014183379
0.301769034	-0.16301847
0.308890055	-0.06793383
0.288765092	-0.041763306
0.451278544	-0.077075104
0.395083704	-0.063324684
0.306275887	-0.087922609
0.363055626	0.004765014
0.428836158	-0.000888987
0.330571077	-0.031003976
0.33749517	-0.030822312
0.301290192	-0.000382068
0.365069546	-0.036764152
0.347265399	-0.084573193
0.373363184	-0.009791476
0.399022652	0.032772996
0.320243644	0.026390776
0.336092282	0.026545997
0.24786989	-0.146135117
0.294730687	-0.165671551
0.332177913	-0.127879011
0.415911803	-0.025863358
0.321982293	-0.094575952
0.308858354	-0.084479678
0.34011777	-0.062155841
0.287108428	-0.025068698
0.388050209	-0.025615106
0.350245889	-0.144864274
0.331219597	-0.084624174
0.354054651	0.03569023
0.295965265	-7.27E-05
0.368069667	-0.029253081
0.281162647	-0.091786468
0.332575037	-0.03206764
0.266411109	-0.062615499
0.349549366	-0.093738156
0.334132807	-0.154619601
0.305916431	-0.043654079
0.322543177	-0.046550994
0.309325712	-0.038939652
0.251402662	-0.182833973
0.345875902	-0.113055456
0.3945502	-0.008914174
0.493354916	0.016943421
0.370302894	-0.035080546
0.423250351	-0.053225482
0.302635928	-0.054117474
0.354345779	-0.115485974
0.331622245	-0.176440682
0.443169294	-0.084941375
0.307764126	-0.077120949
0.431844571	-0.023585437
0.362066093	0.078058953
0.331672712	-0.043095901
0.347866446	-0.026001391
0.319236712	0.015200412
0.421028155	-0.0264387
0.33852854	-0.059159711
0.337473988	-0.069591192
0.487754809	-0.004809646
0.431119851	0.012208232
0.420129781	-0.057818414
0.295667735	-0.081248571
0.386267047	-0.048664235
0.32828405	-0.032915449
0.412344396	-0.00113244
0.352477049	-0.156465768
0.414209339	-0.057278188
0.442280536	-0.061627419
0.3154414	-0.124644978
0.311472653	-0.052192364
0.298183461	-0.030587273
0.323876738	-0.000458326
0.324774104	-0.001188337
0.358452099	0.056139126
0.333228419	-0.06375034
0.32738784	-0.139934655
0.388571896	0.026747732
0.371722072	-0.027842604
0.292465384	-0.020772755
0.272842581	-0.098630197
0.370699603	-0.044443347
0.36818561	-0.047455107
0.334581812	0.048961456
0.377939511	-0.162903115
0.347984028	-0.084982609
0.302077796	0.055128024
0.344641174	-0.038398889
0.284289098	-0.010046503
0.281666846	-0.060518938
0.351951476	-0.053883393
0.335602354	0.002221528
0.394247944	-0.127904035
0.380012272	-0.191221313
0.307251318	0.004114219
0.31965757	-0.141695346
0.339223088	-0.135677881
0.289388511	-0.025319727
0.34103092	-0.041997921
0.363574348	-0.016281839
0.261332013	-0.078075579
0.376111989	-0.038288091
0.282678324	-0.092847112
0.315036339	-0.053427882
0.243255714	0.065529946
0.300643825	0.026661178
0.365577008	-0.036874951
0.431606666	0.006985948
0.418876223	-0.036236749
0.347361558	-0.113903053
0.352153754	-0.056126571
0.384115509	-0.059629376
0.261801149	-0.060264332
0.357916228	-0.072021784
0.410492801	0.040837091
0.424563812	-0.071381187
0.340083871	-0.106547841
0.295307477	-0.127438254
0.325085281	-0.098594
0.303072404	-0.089671948
0.35486663	0.001372005
0.365435849	-0.010922335
0.319282535	-0.065928133
0.397617598	-0.049188324
0.292672506	-0.127532202
0.354285034	-0.091807468
0.365254494	-0.057194481
0.235796622	-0.016331544
0.241779334	-0.083557255
0.338453618	-0.10561445
0.418338314	-0.074477152
0.388948064	-0.050712954
0.395103554	-0.015543829
0.353398675	-0.040197874
0.356963	-0.102309166
0.377272035	-0.086147789
0.353545707	-0.0360781
0.347914036	-0.007432823
0.284052282	-0.106935072
0.29643446	-0.048415842
0.422612155	-0.018862175
0.298126854	-0.045992197
0.312306751	-0.014691018
0.326916214	-0.073851584
0.302293148	-0.010907698
0.258175265	-0.108142746
0.373695038	-0.070089406
0.266914414	-0.021552584
0.380456985	-0.030867855
0.30287848	-0.051769564
0.369800689	-0.173590429
0.374573283	-0.043702935
0.325376097	-0.051560017
0.326559084	-0.006063785
0.256314551	-0.010362379
0.304627452	-0.077410772
0.339804462	0.00336168
0.285968072	-0.092598448
0.353198661	0.020658491
0.322680155	-0.093016228
0.342980233	-0.113639789
0.449827189	-0.076436609
0.362747627	-0.169561578
