# Supplementary material for: Microstructural organization of human insula is linked to its macrofunctional circuitry and predicts cognitive control
Source: eLife. 2020 Jun 4;9:e53470. doi: 10.7554/eLife.53470 (PMC7308087; doi:10.7554/eLife.53470)
Supplement: Figure 8—source data 3. [file elife-53470-fig8-data3.csv]

X_CANAxis1	Y_CanAxis1
1.630088523	-0.215303663
-0.015443882	0.146325365
0.575990946	1.415580033
-0.555683377	0.380935453
0.323831928	-1.445080999
-0.487673616	-0.137537283
-1.691569173	0.182897945
0.568387594	0.560363016
-0.031220238	-0.041837746
0.038315549	-0.825583685
0.724379514	-0.965432134
0.749097395	-1.843696805
1.065928867	1.050119908
0.305076414	-1.142236274
-1.290571571	1.089998495
1.45282152	-1.80381578
1.462657645	-0.004679469
0.245819976	0.816992098
-1.413574976	-0.434886631
-0.366340225	0.055834142
-0.959269544	-0.782227958
-0.054271586	0.257143268
-1.83843062	-1.767449785
0.942966661	0.653671802
0.817934982	-0.367972068
0.335796896	0.680878425
-1.012717891	-1.373412179
0.107429561	1.767235511
-1.13176283	-0.765530068
0.602028029	0.282409588
1.62804187	0.448372415
0.610778765	-0.155896906
0.941021064	0.531772672
0.617775943	0.505900447
-0.595932324	-0.109313638
-1.080144636	-1.907801969
-1.505998943	-1.532637245
-0.360494692	-0.567586522
-1.009691931	1.173684844
0.4550045	1.412192005
0.502636671	-0.802506786
0.318823951	-1.329878598
0.381505102	0.121286641
-1.592872829	-0.285457791
0.410424313	1.189432118
-0.382169498	-0.216363175
0.805660392	-0.779098004
0.710445544	0.578386993
-0.380108471	0.096059795
0.236035999	-1.445934366
-0.511070397	0.639070072
-1.967356346	-1.80347264
0.377110758	-0.730252491
0.850978611	0.837435743
-0.667440893	-0.41924684
0.174397879	-0.68291447
1.146525529	0.865277742
1.070167358	-0.779072895
-1.30066167	-0.118959097
0.366912059	0.565756562
-0.401291026	-0.823056734
1.024068411	0.310666237
0.308686633	-0.918827283
0.3646117	0.733976372
-0.091760589	0.49219017
1.608323742	1.4818762
0.75114596	0.400187752
-0.08015191	-2.053107606
-0.045257906	-0.24987783
-0.416541194	-0.810639449
1.431152751	0.886130103
-0.353143795	-1.145481878
-0.821542574	0.708937999
-0.774494161	-0.363484156
-0.553279925	1.580563732
2.717331238	-1.668920397
-0.157892599	-0.832916039
0.695433429	1.819613004
0.815937657	0.496727075
-0.990811619	0.074215592
0.042983835	0.466927206
0.800519788	0.553557064
-0.562847925	-0.105409858
-0.094416281	-0.064724385
0.99847617	0.053203882
0.482582641	-0.851417055
1.017546759	0.231252441
-0.927816433	-0.080480488
0.889138444	-0.690040113
1.491936054	-0.611651731
0.335012204	0.254496926
-1.069796144	0.134450005
-0.329821773	0.53761768
1.292677025	1.295020971
-1.377935932	-0.156446726
-0.279225462	0.54510126
-0.930809642	0.851405249
0.513744869	0.207104375
0.113411071	-0.334097077
1.445492368	1.561959947
-0.213068601	0.425844252
-0.248683126	-0.442063761
1.198768368	1.567034504
0.611732333	0.404388379
-2.084626882	-0.553350735
-2.386879508	-0.673297
0.283291576	-0.148945879
1.277529075	0.42967242
-0.205966266	0.759231906
0.190192518	0.591902316
-1.685363126	0.753409098
1.768834965	0.158446899
0.20794825	0.054138191
0.479653665	0.226003806
-0.639638386	-0.27953903
2.020000999	1.582202684
-0.692456551	0.385004796
0.133494572	-1.164699418
-1.626939352	-1.571038734
0.925388825	0.477571215
-1.728686756	-0.117759286
1.175250032	-1.31324074
0.536091292	0.114427168
1.500173601	1.509970935
0.362341009	-0.480889068
0.584022906	0.051790609
1.137905273	0.009992911
0.932454925	1.05194677
1.371112226	0.062528541
0.421121146	1.157975387
0.805192049	0.117439291
-1.038819316	-2.192160007
-0.464711488	0.284344175
-2.275652852	-1.318267865
0.935380428	0.744529802
-0.235337436	0.318774814
1.086155445	-0.688302265
-1.196995414	-0.264458569
-0.49505177	-0.120504218
-2.158468972	-1.511418269
0.541448251	0.287861283
-0.085129448	0.980286415
-2.501163312	-0.424824088
0.234856827	-1.619374059
-1.110849413	-1.637465977
2.367876007	0.896466235
0.204588937	-0.925216985
0.547041298	-0.089203184
-1.532302981	-1.139917
-1.400458136	0.412509425
-0.003459252	-0.666972903
0.819952166	0.446892765
-0.985234633	0.935830503
1.120225163	1.112720284
-1.672205466	-1.678697476
-1.364106906	-0.245676709
-0.234234199	-1.817680141
0.503461244	0.878731709
-1.450611134	0.903108889
0.12459197	2.145165814
0.150467144	1.45029865
0.502820232	1.490156176
1.10120461	0.581122786
1.087075065	1.369148515
-1.562378886	-0.450357569
0.991968921	0.800331622
-0.674880045	0.580656349
0.181277652	0.145359371
-0.985988767	-1.166465237
0.158618446	-0.79471374
-0.144985037	0.340931736
-0.908741755	-0.356947537
0.007248209	1.139709612
-0.786165334	0.053616499
1.273041128	1.132449464
-0.511949034	1.493573202
1.370524096	0.817928428
-1.468508239	-1.447813757
-0.961279506	-0.10128716
-1.929946854	-1.274863787
1.324340871	0.034088356
-1.775018699	0.15861366
0.21684098	1.169496209
-0.254310733	-1.315466523
-1.213038957	-0.348731028
1.193878036	0.754357147
0.56994852	-0.956800222
-0.677550493	-0.012153742
-0.785726147	-0.414207677
-0.059743837	-0.451365847
0.792855755	0.25521203
-1.016205184	0.074983423
-2.058167837	-1.346403591
1.369499266	-1.034417612
1.4847596	-0.049217109
-0.838824037	-0.33519935
1.058251889	-1.371486819
-0.11983627	-1.162051513
-0.332906462	-0.710703779
0.797099867	2.024103495
0.672778242	0.055141982
-0.093615279	0.517319192
-0.86500221	0.155228677
-0.16696586	-1.500578512
1.518705128	1.813407058
2.124284783	0.891758535
1.078353479	0.125290642
-0.424932405	-0.017508359
-0.230111924	0.182982029
1.171414956	0.760644167
1.196478184	-0.547767448
-0.314943134	0.753025188
-0.086228407	1.283299196
-0.01766115	-1.157040783
0.972345038	1.601442107
-1.233878024	0.66051564
0.121781317	1.388498569
-0.161683953	0.032688962
-1.78879669	0.348559682
0.044447386	-1.17000468
1.4749626	-0.220703004
0.549675987	0.463051585
0.13087273	-0.971444456
-0.871519384	0.067064943
0.930772394	2.426986222
0.530308634	0.799521325
-0.527981388	1.209128067
0.332374809	0.010843728
-0.665597385	-1.472702506
0.149092368	-0.246168682
-0.845708605	0.225330547
-1.92776989	-2.309360339
-0.145950377	-0.511064257
1.227152142	-1.078272693
0.338113132	1.59763169
0.264365728	-0.008832601
0.88608272	0.505607959
0.493628384	1.886315559
-0.016038367	0.105208842
-0.571450268	-0.401787009
0.299612211	0.709989833
-0.15944109	-0.104973611
1.649098736	-0.191682726
0.344139149	0.252742262
0.183990041	-1.199186144
1.496503374	1.950647101
0.643275205	-0.26460076
2.19092553	-0.950825887
-1.083758161	0.238352095
-1.114656725	-0.709600962
1.386466309	0.838854284
-0.962848747	-1.499760314
-1.647577084	-0.814168227
0.321542413	-0.923904128
0.195952317	-0.759295449
0.2002995	-0.717054488
0.45978077	-0.455064091
0.956195252	0.858322413
0.105293443	-0.698472179
-1.674151127	-2.212573448
0.052725618	-1.464600126
0.653556499	-1.205168354
0.992933834	2.305677255
0.74932008	2.079649714
0.584120028	1.958913367
-1.009067563	-0.869267009
0.664891919	0.605343604
0.526286013	0.831388766
-0.8606013	0.523135294
0.995254105	-0.619868068
0.137443139	-0.674715677
-0.534935396	0.848049499
-0.031290601	0.762701879
-1.121864457	-1.920987674
-2.364195982	-1.926380689
-0.13285716	-0.226127619
1.52714175	0.669654851
1.207546744	-0.566398211
0.058520531	0.163337746
-0.424172418	1.614342037
0.687766358	1.06448837
-0.027085005	-0.086108568
0.491518595	0.13670959
1.322281424	-0.630426367
1.46488743	2.423433857
-0.061473224	0.761347324
-0.454333113	-0.692818368
-3.227216907	-0.906624858
-0.328628247	-0.583180045
-1.229486902	-0.348927051
0.895970904	0.796578471
-0.193287462	1.102167678
0.670195517	2.549485288
-1.068382967	1.165780229
1.108755439	0.195913593
-2.655965071	-0.76667981
0.223188285	-2.630416548
0.473177238	0.169497064
0.2635591	-1.062907924
0.004913756	-1.512974994
-0.459367395	-0.922441935
-0.272112121	-0.09331807
-0.380660631	0.661702289
-1.371705264	-0.293531077
-1.400603874	-0.866294083
-0.964679352	-0.153797677
0.032129013	-0.036285413
-1.359177357	-0.662593648
0.067642439	-0.523606949
-1.047783176	-0.049341706
0.555278482	2.360413193
-0.745677871	-0.608409179
-1.428571413	0.540922901
2.124782982	1.150989328
0.600754524	0.310894168
1.35703007	-0.590079472
0.086820627	-1.215752615
-0.025852878	-1.09171536
0.890349228	-1.483640468
-0.944763659	0.601722273
-0.609866203	1.231958924
-1.06678743	-1.793910629
-0.68170119	-0.713148001
1.652839663	0.12343806
-0.868177221	1.28574812
-1.516863068	-0.88571249
0.969172472	-0.203739446
1.225736457	-1.642879238
-0.147797746	1.225570466
-0.821555027	0.882096821
0.621007826	-1.799499709
0.808137348	-0.238962812
1.521307146	-0.473133244
0.707809922	0.388380798
-0.561828635	-0.230567484
0.052867144	-1.026864603
0.428007602	1.841513202
-0.604145634	2.826482769
-1.023233458	-1.251273736
1.252111246	1.17098898
-0.831224494	-0.094568413
-0.431191428	-0.965514485
0.641571649	-0.484961612
1.361148922	-0.193303054
1.176430428	0.030872187
-2.076431715	-0.299444529
0.774496371	0.60146669
-0.934739679	-0.027176707
0.685849261	-1.287567765
0.456906844	-2.213108382
0.207103608	-0.292628602
-1.529097973	-1.463834455
-1.551393769	0.067178596
0.027322302	1.948333815
-0.071784763	0.337614195
-0.915002335	0.069466854
1.003684467	0.882474869
-0.313470555	-0.412994294
-2.290333914	-2.633684923
-0.69996741	0.040423864
0.751121719	0.903561137
0.996507309	2.905869508
0.717804103	1.138647345
-0.177620723	0.060798712
-0.315891392	-1.160638514
0.095979514	-0.558314924
-0.246180758	0.196900592
-0.454223103	-0.390708429
0.318637098	1.199747236
-2.191781985	0.418052483
0.121494213	0.151928848
1.293875276	-0.291952444
1.12214173	0.821564081
0.036612586	0.893403411
-2.255900914	0.294997463
-0.615675948	-0.159313835
-0.895433381	-0.685728208
0.275284787	0.173686451
0.39982125	0.387253141
-0.04813075	0.066695572
-0.639227559	0.055521049
-0.081890006	0.263023039
1.425090451	1.280233404
-0.431902166	-0.418712249
-1.508824023	-1.250121568
0.065495329	0.451452378
-1.870797106	-1.058968808
-0.007779569	-0.238758139
0.371383856	-0.218271035
1.10947298	0.406878213
-0.518400718	0.043998229
0.416836647	-0.380190612
-0.370387175	-0.512576959
-0.060486204	0.085130041
-0.062275916	2.371615762
-0.775650527	-0.655154764
0.249690248	-0.37919529
-0.445054916	-0.787845938
2.052848293	-0.463100245
1.042775869	0.053172064
-0.189135212	-1.12676486
1.495510694	0.675583773
-0.988806791	-1.130095495
0.305203305	1.304130033
0.189630801	0.97259234
-1.029807507	0.436666218
-0.574857239	2.300719311
