# Supplementary material for: Microstructural organization of human insula is linked to its macrofunctional circuitry and predicts cognitive control
Source: eLife. 2020 Jun 4;9:e53470. doi: 10.7554/eLife.53470 (PMC7308087; doi:10.7554/eLife.53470)
Supplement: Figure 8—source data 4. [file elife-53470-fig8-data4.csv]

X_pred	Y_pred
0.575229887	-0.00667899
0.545889774	-0.079662972
0.599768056	-0.02101756
0.538905831	0.063150679
0.596026561	0.009672578
0.657996926	-0.023805831
0.54361978	-0.03723829
0.574601965	0.002676948
0.566412995	0.052786566
0.541190937	0.054605373
0.53283705	0.152029898
0.520353179	-0.017598935
0.566204224	0.069241827
0.645068015	-0.086493312
0.522104056	0.129534295
0.504581261	-0.024873903
0.559244858	-0.037417267
0.644504953	-0.008392024
0.591517678	-0.004889235
0.620591964	0.035668701
0.577914739	-0.015672742
0.64725491	0.099124817
0.530217685	-0.020311533
0.528733062	0.035748933
0.561742219	-0.027843984
0.613697344	0.06012085
0.576610022	-0.083291644
0.627890198	0.020468232
0.542801942	-0.015487251
0.492211225	-0.002178391
0.540595919	0.009097845
0.527206957	-0.018603266
0.543300039	-0.029589341
0.601411425	0.010054567
0.592164167	0.082896157
0.65094146	0.074805226
0.591617236	0.027044395
0.624429941	-0.061450838
0.564923104	-0.063333926
0.531110519	0.038243556
0.550974657	0.07726225
0.554671554	-7.47E-05
0.654645417	0.034749204
0.554774558	-0.069240355
0.588607992	0.011540706
0.53738623	0.065905194
0.539609883	-0.020865209
0.592329962	-0.005151096
0.56416469	0.087172034
0.600908696	-0.032747431
0.673283374	0.078306089
0.551534573	0.045269786
0.53135545	-0.037284814
0.609834506	0.022826829
0.55859437	0.048552376
0.512193366	-0.05343795
0.520447623	0.030628756
0.639618754	-0.018263446
0.562397693	-0.034049371
0.5891756	0.046908653
0.52194407	-0.021667601
0.554202956	0.036910891
0.556066172	-0.03206847
0.578685335	-0.020605682
0.49089214	-0.065842489
0.53632264	-0.020133706
0.571258474	0.093538061
0.57459224	0.012852941
0.59005445	0.039194359
0.511836477	-0.050234406
0.585292621	0.05256733
0.618498664	-0.02923163
0.608055398	0.018043246
0.605283272	-0.083049399
0.44590141	0.096320972
0.578325966	0.042055545
0.540574411	-0.087245499
0.532990775	-0.031760247
0.626834523	-0.012244647
0.56870099	-0.024384709
0.536275912	-0.03616722
0.598494191	-0.00762571
0.577343823	0.001043943
0.525439493	-0.009107692
0.544924912	0.054116044
0.52189624	-0.013912788
0.619001256	0.004796248
0.534143203	0.054065499
0.49791876	0.032842234
0.555530647	-0.005835538
0.628863379	-0.016592356
0.592990189	-0.029033976
0.505967024	-0.052954642
0.639721626	0.009366555
0.58821587	-0.035172456
0.62594047	-0.04574134
0.547195573	-0.001440715
0.559314584	0.016145187
0.498264673	-0.068930218
0.584850579	-0.021448151
0.582774263	0.025885413
0.516442723	-0.046943135
0.540304115	-0.02630059
0.688230527	0.015395693
0.694029647	0.026485842
0.562521873	0.007270825
0.508935839	-0.047146609
0.584521108	-0.045198807
0.564939219	-0.032368536
0.660881257	-0.068307569
0.48439908	-0.034556959
0.561633135	0.000144718
0.549986778	-0.01077454
0.603672312	0.014415021
0.47448479	-0.044883637
0.607446165	-0.02342066
0.553458667	0.065715912
0.646811014	0.080333529
0.528736995	-0.023654147
0.659893372	0.016048951
0.511875893	0.066488496
0.546718734	-0.00866361
0.510937015	-0.039318184
0.557367691	0.015664545
0.544299339	0.012648005
0.506811305	0.018596061
0.526184319	-0.051007895
0.498971431	-0.005366523
0.555201255	-0.05414799
0.53115311	-0.008386132
0.617096985	0.119939011
0.597163382	-0.012118805
0.694956932	0.082228734
0.527686596	-0.046209223
0.584325309	-0.018891232
0.527838122	0.043128681
0.631506082	0.018787103
0.596085932	0.008454208
0.679469192	0.076199906
0.547447685	-0.011457315
0.574610311	-0.064929497
0.700938302	0.026470768
0.558095608	0.086492647
0.635876511	0.081055578
0.450387975	-0.079452963
0.560137303	0.048593589
0.546404445	0.000831458
0.649493052	0.049292242
0.645349196	-0.031405202
0.556727181	0.039330228
0.528731855	-0.005384507
0.628981961	-0.033558893
0.521566814	-0.062963121
0.661226009	0.051093457
0.638023117	0.02605153
0.582680947	0.08698336
0.549726526	-0.043724881
0.674400304	-0.029939086
0.578458238	-0.11022605
0.5613862	-0.086233813
0.562404089	-0.071064727
0.519794422	-0.022280097
0.517542219	-0.092107328
0.654000878	0.018655181
0.529770739	-0.038741104
0.618852756	-0.022462547
0.564503798	-0.005910159
0.624347833	0.043260435
0.556362869	0.042480145
0.579297258	-0.023083033
0.616873619	0.022559953
0.573457358	-0.058601495
0.612084005	-0.015246534
0.510754536	-0.052859041
0.617857823	-0.051994214
0.498836816	-0.003645305
0.637798785	0.059562645
0.619792812	0.008541364
0.672443904	0.071837765
0.50088753	0.014393058
0.667859331	-0.027959088
0.566655718	-0.052864582
0.588923267	0.070034064
0.628287442	0.006213512
0.517117109	-0.032200471
0.539505002	0.019682769
0.606223855	0.009975575
0.609192956	-0.000566839
0.575522148	0.02109713
0.532544867	-0.007818604
0.623527622	-0.029659578
0.66669799	0.061195468
0.515094303	0.039622463
0.491807016	-0.002162905
0.617560672	0.023832319
0.501722526	0.069585693
0.572776082	0.050390085
0.585807636	0.035050142
0.536924187	-0.094926383
0.537075938	-0.000756025
0.57659716	-0.029752514
0.612329832	-0.012858234
0.581137456	0.067535431
0.497462746	-0.090312232
0.47095292	0.023965503
0.520714072	0.000908495
0.592213153	-0.004166817
0.583738852	-0.012756956
0.516022678	-0.014039312
0.52229529	0.04311148
0.58839109	-0.038357448
0.574621819	-0.045494834
0.56478647	0.058664694
0.527676439	-0.079342917
0.643027996	-0.026082342
0.568369357	-0.071386367
0.580304737	-0.003662065
0.676975718	-0.064157848
0.560371175	0.050648034
0.497104919	0.036934627
0.545385919	-0.018630966
0.57333643	0.040919971
0.614678492	-0.015107471
0.541062609	-0.108559042
0.548572718	-0.035478334
0.601681872	-0.056042062
0.552466539	0.009237484
0.600439072	0.081658205
0.56006405	0.011356253
0.618413146	-0.021579478
0.668667023	0.100823277
0.580300381	0.025975766
0.457889105	0.082149276
0.557684894	-0.091691796
0.55959496	-0.00329526
0.524823392	-0.025819768
0.545811248	-0.092049693
0.574780218	-0.006425194
0.602818521	0.010729093
0.558043428	-0.037427312
0.577946062	0.005527207
0.491613906	-0.010657903
0.553296467	-0.014705668
0.540589652	0.083255283
0.499833895	-0.087813569
0.536856418	0.000175672
0.459191725	-0.00136934
0.62758313	-0.026237006
0.630825175	0.020179516
0.50236586	-0.054604744
0.608134194	0.06055427
0.655769008	0.02628763
0.557282398	0.036480682
0.557861331	0.033123922
0.559271828	0.041076063
0.553338086	0.038853937
0.524327936	-0.033790431
0.567187952	0.032522881
0.639086627	0.107663459
0.575932146	0.069085211
0.543005373	0.063369734
0.521678656	-0.113187861
0.524449974	-0.117877154
0.550311139	-0.118889321
0.624259783	0.035985745
0.541833321	-0.031105449
0.548773288	-0.03329977
0.622016553	-0.029734503
0.527827273	0.039053883
0.565649458	0.040844986
0.610255126	-0.05311924
0.573294132	-0.031830392
0.617739353	0.104910317
0.645974444	0.082047245
0.577611027	0.012718924
0.497145725	-0.026392626
0.522376998	0.061150513
0.569199137	-0.009774249
0.596665931	-0.050521009
0.540220996	-0.047362733
0.573774262	0.005008816
0.548648187	-0.006692665
0.512834919	0.022872372
0.49510362	-0.119155505
0.582713293	-0.047119014
0.596731221	0.033613169
0.749731075	0.068704848
0.591860673	0.030319703
0.632765423	-0.002407384
0.525095471	-0.027808297
0.586201483	-0.061771663
0.552281494	-0.135395609
0.622709332	-0.045657458
0.516503269	-0.015542207
0.715096448	0.035737382
0.572352174	0.134567258
0.546286417	-0.010088623
0.56100928	0.049021048
0.565655921	0.082376328
0.59298517	0.042967603
0.582613953	0.004813079
0.592474218	-0.037050689
0.644779177	0.016353745
0.647939371	0.031727941
0.622401741	0.010659125
0.570450173	-0.000749719
0.639844066	0.01618918
0.567866647	0.031441333
0.630299576	0.005507214
0.562944371	-0.129000241
0.606964829	0.018805887
0.655369298	-0.016237044
0.474687241	-0.033214737
0.541908904	-0.012506704
0.507742641	0.058810013
0.571141419	0.060851047
0.563201591	0.051311414
0.525259302	0.083142522
0.631570935	-0.039593648
0.60037108	-0.06148721
0.60986366	0.070782195
0.603971115	0.026636256
0.492223595	0.004004159
0.612982203	-0.127206714
0.64328055	0.036184002
0.52719343	0.017855322
0.492667129	0.073987384
0.57642509	-0.085205754
0.608848064	-0.054851405
0.529387445	0.09898577
0.531355357	0.012935758
0.49779705	0.010253377
0.538094414	-0.009890702
0.597730442	0.006952207
0.568166352	0.05029062
0.565782388	-0.0842756
0.653356554	-0.147852833
0.624167768	0.064981636
0.513440243	-0.053222969
0.609491904	-0.013179029
0.591273001	0.0502569
0.543237699	0.03461161
0.507738317	0.002896563
0.519606525	0.001234733
0.682298345	-0.011777371
0.535502075	-0.028534678
0.620636862	0.007000875
0.543387065	0.08319267
0.498893793	0.112057278
0.565560148	0.01723467
0.648339259	0.075847393
0.652139335	0.020955832
0.570707422	-0.09685899
0.577490116	-0.018053668
0.623722879	0.002080022
0.523538717	-0.02032225
0.58249146	0.01838716
0.679020449	0.105933978
0.608120058	-0.009461104
0.53406169	-0.057147035
0.523164795	-0.126393113
0.537128076	-0.062000652
0.581951044	-0.007759928
0.587468811	0.067949388
0.562264266	0.02904497
0.586167343	-0.007837778
0.596388132	0.022020637
0.559722995	-0.060807187
0.678450587	-0.052522692
0.566465455	-0.005976838
0.499133354	0.029395779
0.516730526	-0.017993555
0.577982277	-0.042244173
0.693141684	-0.02045511
0.604868902	0.010133354
0.618550553	0.032704383
0.558741385	-0.004036157
0.556360491	-0.015792612
0.574681095	-0.003690729
0.605480202	-0.006885775
0.575756671	-0.014846158
0.510848709	-0.046871158
0.591340383	0.012777767
0.65211565	0.054817996
0.570049057	-0.023543602
0.670093907	0.071633195
0.573577958	0.01111785
0.555715832	0.021706096
0.520030826	-0.031847214
0.598823714	-0.005372127
0.552048944	0.025591548
0.592696019	0.022865786
0.575472236	-0.003248168
0.606219546	-0.145381487
0.61230395	0.030071098
0.563897991	0.022671248
0.592939815	0.038420178
0.456801076	0.040580516
0.524928244	-0.025412394
0.57612073	0.042910273
0.501492483	-0.031557417
0.62146779	0.045298021
0.552688758	-0.06289368
0.570526485	-0.04154145
0.626265318	-0.014860476
0.593993952	-0.108886728
